# Supplementary material for: Organogelating and narcissistic self-sorting behaviour of non-preorganized oligoamides
Source: Royal Society of Chemistry journal article supplement (doi:10.1039/c9sc00861f), 2019-01-01

## Supporting Information

### Organogelating and Narcissistic Self-Sorting Behaviour of Non-Preorganized Oligoamides

Kun Zheng, Huaizhen Wang and Hak-Fun Chow

*Department of Chemistry*

*The Chinese University of Hong Kong, Shatin, HKSAR*

#### Contents

|                                                                                  |     |
|----------------------------------------------------------------------------------|-----|
| 1. General information                                                           | S2  |
| 2. Synthesis                                                                     | S4  |
| 3. Gel photos                                                                    | S32 |
| 4. Fourier transformed infrared spectroscopy                                     | S33 |
| 5. Small angle powdered X-ray diffraction                                        | S34 |
| 6. Determination of dimerization constant - $^1\text{H}$ NMR dilution experiment | S35 |
| 7. DSC thermograms                                                               | S36 |
| 8. SEM images                                                                    | S44 |
| 9. $^1\text{H}$ NMR spectra of annealed samples                                  | S45 |
| 10. $^1\text{H}$ NMR spectral end group analysis                                 | S46 |
| 11. List of spectra                                                              | S48 |

## 1. General information

$^1\text{H}$  NMR (400 MHz) and  $^{13}\text{C}$  NMR (100 MHz) spectra were recorded on a Bruker Avance DPX 400 spectrometer. Other  $^1\text{H}$  NMR (500 MHz) and  $^{13}\text{C}$  NMR (125 MHz) spectra were recorded on a Bruker Avance DPX 500 spectrometer. All measurements were performed at 25 °C in  $\text{CDCl}_3$  unless otherwise stated. Chemical shifts were reported in ppm ( $\delta$ ) and coupling constants (J) were reported in hertz. Mass spectra were obtained from a ThermoFinnigan MAT 95 XL double focusing sector mass spectrometer with electron spray ionization (ESI) technique or a Bruker Daltonics Autoflex MALDI-TOF mass spectrometer. Melting points were measured on an Electrothermal® 9100 digital melting point apparatus and were uncorrected. All reactions were performed under  $\text{N}_2$  unless specified. Reactions were monitored by thin layer chromatography (TLC) performed on Merck pre-coated silica gel 60F254 plates. Compounds were visualized by ultra-violet radiation, followed by heating after immersing in 5% (w/v) dodecamolybdophosphoric acid in ethanol. Flash chromatography was carried out on columns of Merck Keiselgel 60 (230–400 mesh). Unless otherwise specified, all reagents were purchased from commercial suppliers and used without further purification. Prior to be used, THF was distilled from sodium/benzophenone ketyl under  $\text{N}_2$ . Toluene was freshly distilled from sodium under  $\text{N}_2$  and  $\text{CH}_2\text{Cl}_2$  was freshly distilled from  $\text{CaH}_2$ . DIPEA was distilled from  $\text{NaOH}$  under  $\text{N}_2$  and stored in molecular sieve.

Infra-red spectroscopic (FTIR) experiments were performed using a Bruker Vertex 70 Fourier-transform spectrometer fitted with a globar source, a  $\text{CaF}_2$  beam splitter, and a liquid nitrogen cooled  $\text{HgCdTe}$  detector. All FTIR spectra were recorded at  $0.2\text{ cm}^{-1}$  resolution. The sample cell was made of a 0.5 mm Teflon spacer sandwiched by two 4-mm thick  $\text{CaF}_2$  disks of 25 mm in diameter, with 0.1 mm optical path. Built-in ‘atmospheric compensation’ routine from the spectrometer was used to minimize the background noise due to atmosphere and solvent (*p*-xylene). All FTIR experiments were performed using spectrophotometric grade *p*-xylene at 20 °C.

Scanning electron microscopy (SEM) was carried out by a FEI Quanta 400F field emission scanning electron microscope. All samples were xerogels prepared by freeze-

drying of the corresponding wet gel in *p*-xylene. The sample analyzed was stuck on the sample holder using a piece of double-sided adhesive tape and was sputter-deposited with minute amount of gold to prevent charging during analysis.

Differential scanning calorimetry (DSC) experiments were performed using a Mettler Toledo DSC StarIII calorimeter. Xerogels were prepared by freezing wet gels in *p*-xylene in liquid nitrogen and then removing the solvent using freeze-dry machine. Unless otherwise specified, all measurements on xerogels were performed by introducing 2~3 mg samples into the cell, followed by heating from 40 °C to 200 °C at 10 °C/min, annealing at 200 °C for 5 min and cooling down to 40 °C at 5 °C/min. After annealed once the sample was heated to 200 °C at 10 °C/min again and then cooled down to 40 °C at 10 °C/min. For the wet gels in *p*-xylene, after transferred into the cell, the sample was annealed at 100 °C for 5 min, cooled down at 5 °C/min to 25 °C. After stabilized at 25 °C for 20 min, it was heated to 100 °C at 5 °C/min to furnish the heating curve. The heat capacitance data given were the results after baseline corrections.

## 2. Synthesis

### (a) Synthesis of key intermediates **13–17**

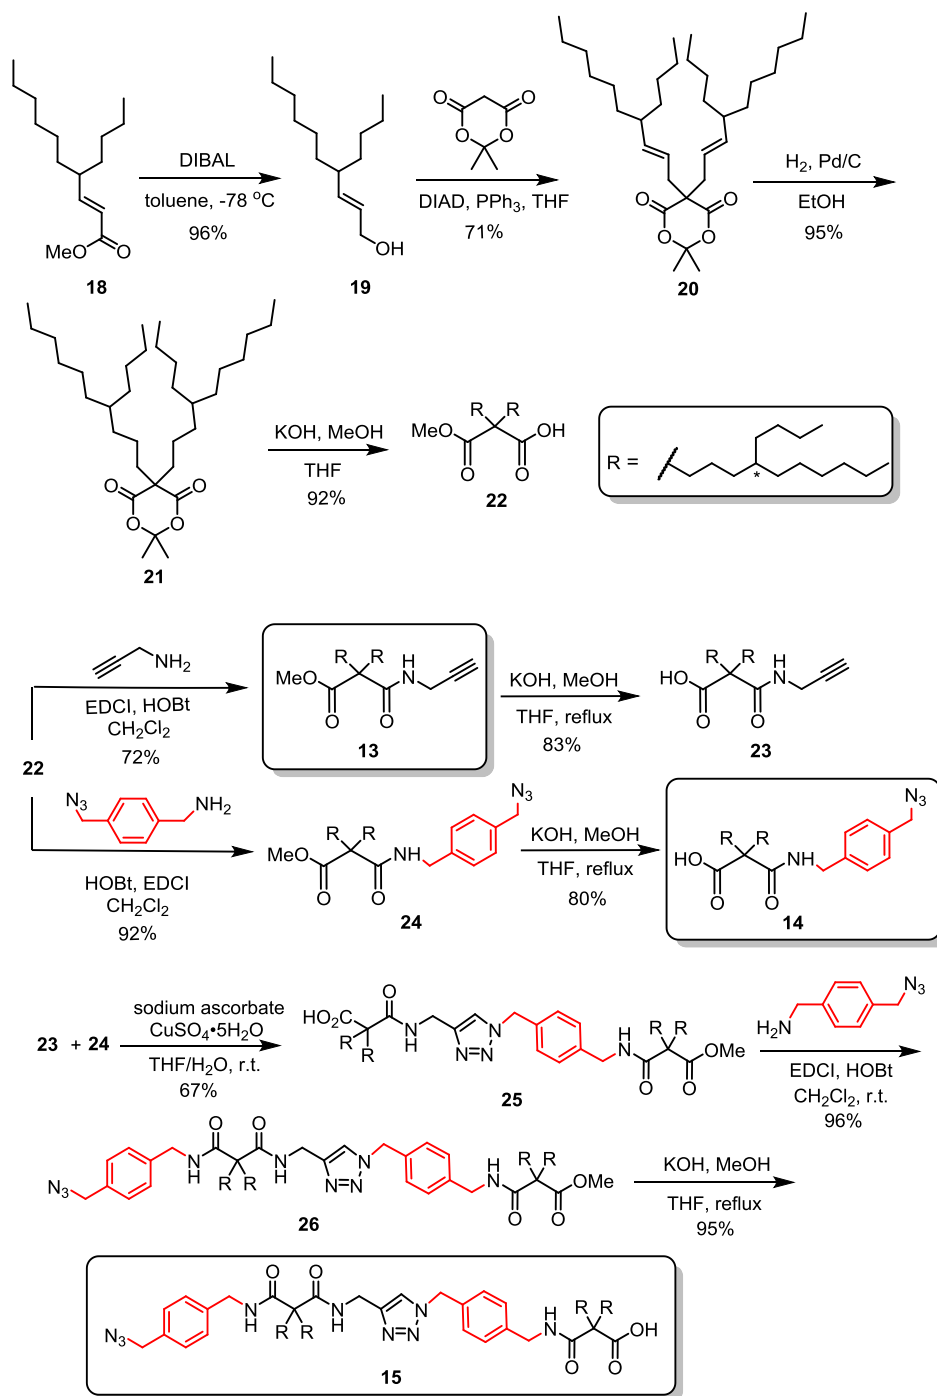

Compound (*E*)-**19**: DIBAL (52.6 mL, 1 M in hexane, 52.6 mmol) was added in small portions to a stirred solution of compound **18**<sup>1</sup> (6.32 g, 26.3 mmol) in toluene (100 mL) at  $-78\text{ }^\circ\text{C}$ . After stirring 8 h at room temperature, the reaction was quenched by pouring into ice-water and kept stirring for 30 min. HCl (1.2 M, 50 mL) was then added to the

<sup>1</sup> Leung, C.-F.; Chow, H. F. *Chem. Eur. J.* **2017**, *23*, 4827.

mixture, and extracted with Et<sub>2</sub>O (3 × 150 mL). The combined extracts were washed with brine, dried (NaSO<sub>4</sub>), filtered and concentrated *in vacuo* to give a colorless oil which was purified by chromatography (eluent: hexane/EtOAc = 9/1) to afford the target compound (*E*)-**19** (5.34 g, 96%) as a colorless oil. *R*<sub>f</sub> = 0.35; <sup>1</sup>H NMR (400 MHz, CDCl<sub>3</sub>): δ = 5.57 (dt, CH=CHCH<sub>2</sub>OH, *J* = 15.3 and 5.9 Hz, 1 H), 5.41 (dd, CH=CHCH<sub>2</sub>OH, *J* = 15.4 and 8.7 Hz, 1 H), 4.10 (t, CH<sub>2</sub>OH, *J* = 5.7 Hz, 2 H), 2.00–1.90 (m, CHCH=CH, 1 H), 1.34–1.20 (m, 17 H), 0.89–0.86 ppm (m, CH<sub>3</sub>, 6 H); <sup>13</sup>C NMR (100 MHz, CDCl<sub>3</sub>): δ = 137.7, 128.7, 63.6, 42.5, 35.3, 35.0, 31.9, 29.6, 29.5, 27.2, 22.9, 22.8, 14.1 ppm; accurate mass (ESI) calcd for [C<sub>14</sub>H<sub>28</sub>O – H]<sup>–</sup>: 221.2067; found: 221.2067.

Compound (*E,E*)-**20**: DIAD (5.71 mL, 27.6 mmol) was added dropwise to a stirred solution of the allylic alcohol **19** (5.34 g, 25.1 mmol), PPh<sub>3</sub> (7.24 g, 27.6 mmol) and recrystallized Meldrum's acid (1.65 g, 11.4 mmol) in toluene (50 mL) at –10 °C. The solution was stirred at room temperature for 12 h and concentrated under reduced pressure. Hexane (50 mL) was then added to precipitate the Ph<sub>3</sub>PO out. The mixture was filtered through a pad of Celite and the filtrate was concentrated *in vacuo* to give a pale oil which was purified by chromatography (eluent: hexane/Et<sub>2</sub>O = 30/1) to afford the target compound (*E,E*)-**20** (4.35 g, 71%) as a colorless oil. *R*<sub>f</sub> = 0.38; <sup>1</sup>H NMR (400 MHz, CDCl<sub>3</sub>): δ = 5.30 (dd, CH<sub>2</sub>CH=CH, *J* = 15.2 and 8.7 Hz, 2 H), 5.17 (dt, CH<sub>2</sub>CH=CH, *J* = 15.2 and 7.2 Hz, 2 H), 2.63 (d, CH<sub>2</sub>C=C, *J* = 7.2 Hz, 4 H), 1.81 (m, CHCH=CH, 2 H), 1.63 (s, CCH<sub>3</sub>, 6 H), 1.23–1.08 (m, 32 H), 0.83–0.79 ppm (m, CH<sub>3</sub>, 12 H); <sup>13</sup>C NMR (100 MHz, CDCl<sub>3</sub>): δ = 168.9, 142.3, 121.7, 105.3, 55.8, 42.9, 42.5, 35.2, 34.8, 31.9, 30.0, 29.55, 29.54, 27.3, 22.9, 22.7, 14.12, 14.09 ppm; accurate mass (ESI) calcd for [C<sub>34</sub>H<sub>60</sub>O<sub>4</sub> + Na]<sup>+</sup>: 555.4384; found: 555.4379.

Compound **21**: 10% Pd/C (0.36 g) was added to a solution of compound **20** (3.60 g, 6.7 mmol) in ethanol (50 mL) and the mixture was stirred under H<sub>2</sub> (1 atm) at room temperature for 12 h. The reaction mixture was then filtered through a pad of Celite and the filtrate was evaporated *in vacuo* to afford the target compound **21** (3.41 g, 95%) as

a colorless oil.  $R_f = 0.35$  (hexane/EtOAc = 20/1);  $^1\text{H NMR}$  (400 MHz,  $\text{CDCl}_3$ ):  $\delta = 1.96\text{--}1.92$  (m,  $\text{CCH}_2$ , 4 H), 1.71 (s,  $\text{CCH}_3$ , 6 H), 1.20–1.16 (m, 42 H), 0.87–0.84 ppm (m,  $\text{CH}_3$ , 12 H);  $^{13}\text{C NMR}$  (100 MHz,  $\text{CDCl}_3$ ):  $\delta = 169.7, 105.5, 55.1, 40.0, 37.2, 33.7, 33.6, 33.3, 32.0, 29.9, 29.8, 28.9, 26.7, 23.3, 23.2, 22.8, 14.2$  ppm; accurate mass (ESI) calcd for  $[\text{C}_{34}\text{H}_{64}\text{O}_4 + \text{Na}]^+$ : 559.4697; found: 559.4691.

Compound **22**: KOH (1.50 mL, 2.5 M) was added to the Meldrum's acid **21** (0.51 g, 0.93 mmol) in THF/MeOH ( $v/v = 1/5$ , 24 mL). The reaction mixture was stirred at 25 °C for 24 h. Aqueous HCl (50 mL, 1.2 M) was added to the solution and the mixture was extracted with  $\text{Et}_2\text{O}$  ( $3 \times 20$  mL). The combined extracts were dried with  $\text{Na}_2\text{SO}_4$ , filtered and concentrated *in vacuo* to give a pale yellow oil which was purified by chromatography (eluent: hexane/EtOAc/HOAc = 240/30/1) to afford the target compound **22** (0.46 g, 92%) as a colorless oil.  $R_f = 0.29$ ;  $^1\text{H NMR}$  (400 MHz,  $\text{CDCl}_3$ ,  $\text{CO}_2\text{H}$  signal too broad to be observed):  $\delta = 3.78$  (s,  $\text{OCH}_3$ , 3 H), 1.96–1.80 (m,  $\text{CCH}_2$ , 4 H), 1.25–1.18 (m, 42 H), 0.89–0.86 ppm (m,  $\text{CH}_3$ , 12 H);  $^{13}\text{C NMR}$  (100 MHz,  $\text{CDCl}_3$ ):  $\delta = 175.7, 175.2, 58.0, 53.0, 37.1, 35.5, 33.8, 33.7, 33.6, 33.3, 33.2, 32.1, 29.9, 28.9, 26.7, 23.3, 22.8, 21.9, 14.29, 14.26$  ppm; accurate mass (ESI) calcd for  $[\text{C}_{32}\text{H}_{62}\text{O}_4 + \text{Na}]^+$ : 533.4540; found: 533.4551.

Compound **13**: HOBt (0.14 g, 1.02 mmol) and EDCI (0.31 g, 1.02 mmol) were added in succession to a stirred solution of compound **22** (0.40 g, 0.78 mmol) in dichloromethane (DCM) (20 mL) at 0 °C. After 10 min, propargylamine (0.10 mL, 1.57 mmol) was added to the mixture. The reaction was allowed to stir at 25 °C for 12 h.  $\text{H}_2\text{O}$  (5 mL) was then poured into the solution and the reaction mixture was extracted with DCM ( $3 \times 20$  mL). The combined organic layers were washed with saturated  $\text{NaHCO}_3$  ( $2 \times 10$  mL), saturated  $\text{NaHSO}_4$  ( $2 \times 10$  mL), dried over  $\text{Na}_2\text{SO}_4$ , filtered, and concentrated *in vacuo*. Chromatography of the residue over silica gel (eluent: hexane/ $\text{Et}_2\text{O} = 8/1$ ) afforded the compound **13** as a pale yellow oil (0.31 g, 72%).  $R_f = 0.28$ ;  $^1\text{H NMR}$  (400 MHz,  $\text{CDCl}_3$ ):  $\delta = 8.33$  (t, NH,  $J = 4.8$  Hz, 1 H), 4.07 (dd,  $\text{CH}=\text{CCH}_2$ ,  $J = 4.8$  and 2.4 Hz, 2 H), 3.73 (s,  $\text{OCH}_3$ , 3 H), 2.18 (t,  $\text{C}\equiv\text{CH}$ ,  $J = 2.4$  Hz,

1 H), 2.01–1.95 (m, CCH<sub>2</sub>, 2 H), 1.75–1.69 (m, CCH<sub>2</sub>, 2 H), 1.21–1.16 (m, 42 H), 0.88–0.85 (m, CH<sub>3</sub>, 12 H); <sup>13</sup>C NMR (100 MHz, CDCl<sub>3</sub>): δ = 176.3, 171.2, 79.8, 71.2, 58.2, 52.4, 38.3, 37.1, 33.72, 33.69, 33.57, 33.31, 33.21, 32.1, 29.9, 29.2, 28.94, 28.91, 26.69, 26.65, 23.3, 22.8, 22.6, 14.29, 14.25 ppm; accurate mass (ESI) calcd for [C<sub>35</sub>H<sub>65</sub>NO<sub>3</sub> + Na]<sup>+</sup>: 570.4857; found: 570.4867.

Compound **23**: KOH (2.50 mL, 2.5 M) was added to compound **13** (0.41 g, 0.73 mmol) in THF/MeOH (*v/v* = 1/1, 20 mL). The reaction mixture was heated to reflux and stirred for 12 h. After cooling down to room temperature, the solution was quenched with aqueous HCl (10 mL, 1.2 M) and extracted with Et<sub>2</sub>O (3 × 20 mL). The combined extracts were dried with Na<sub>2</sub>SO<sub>4</sub>, filtered and concentrated *in vacuo* to give a pale yellow oil which was purified by chromatography (eluent: hexane/EtOAc/HOAc = 400/40/1) to afford the target compound **23** (0.32 g, 83%) as a colorless oil. *R*<sub>f</sub> = 0.21; <sup>1</sup>H NMR (400 MHz, CDCl<sub>3</sub>, CO<sub>2</sub>H signal too broad to be observed): δ = 6.83 (br s, NH, 1 H), 4.12 (dd, CH≡CCH<sub>2</sub>, *J* = 5.3 and 2.5 Hz, 2 H), 2.25 (t, C≡CH, *J* = 2.5 Hz, 1 H), 2.10–2.04 (m, CCH<sub>2</sub>, 2 H), 1.66–1.61 (m, CCH<sub>2</sub>, 2 H), 1.29–1.17 (m, 42 H), 0.89–0.85 (m, CH<sub>3</sub>, 12 H); <sup>13</sup>C NMR (100 MHz, CDCl<sub>3</sub>): δ = 175.5, 78.6, 72.2, 56.8, 39.8, 37.3, 33.8, 33.63, 33.61, 33.24, 33.21, 32.1, 29.9, 29.7, 29.0, 28.9, 26.73, 26.72, 23.2, 22.8, 22.6, 14.30, 14.26 ppm; accurate mass (ESI) calcd for [C<sub>34</sub>H<sub>63</sub>NO<sub>3</sub> + Na]<sup>+</sup>: 556.4700; found: 556.4719.

Compound **24**: HOBt (0.95 g, 7.05 mmol) and EDCI (2.10 g, 7.05 mmol) were added in succession to a stirred solution of compound **22** (2.77 g, 5.42 mmol) in DCM (50 mL) at 0 °C. After 10 min, 4-(azidomethyl)benzylamine<sup>2</sup> (1.38 g, 8.51 mmol) was added to the mixture. The reaction solution was allowed to stir for 12 h at 25 °C. The reaction was quenched with water (20 mL) and extracted with DCM (3 × 40 mL). The organic layer was washed with saturated NaHCO<sub>3</sub> (2 × 30 mL), saturated NaHSO<sub>4</sub> (2 × 30 mL), dried over Na<sub>2</sub>SO<sub>4</sub>, filtered, and concentrated *in vacuo*. Chromatography of

<sup>2</sup> Lau, K.-N.; Chow, H.-F.; Chan, M.-C.; Wong, K.-W. *Angew. Chem. Int. Ed.* **2008**, *47*, 6912.

the residue over silica gel (eluent: hexane/Et<sub>2</sub>O = 8/1) afforded compound **24** as a colorless oil (3.25 g, 92%).  $R_f = 0.31$ ; <sup>1</sup>H NMR (400 MHz, CDCl<sub>3</sub>):  $\delta = 8.43$  (t, NH,  $J = 5.6$  Hz, 1 H), 7.32–7.25 (m, ArH, 4 H), 4.51 (d, NHCH<sub>2</sub>Ar,  $J = 5.7$  Hz, 2 H), 4.32 (s, ArCH<sub>2</sub>N<sub>3</sub>, 2 H), 3.73 (s, OCH<sub>3</sub>, 3 H), 2.06–1.99 (m, CCH<sub>2</sub>, 2 H), 1.78–1.71 (m, CCH<sub>2</sub>, 2 H), 1.31–1.23 (m, 40 H), 1.05–1.02 (m, CHCH<sub>2</sub>CH<sub>2</sub>, 2 H), 0.90–0.86 (m, CH<sub>3</sub>, 12 H); <sup>13</sup>C NMR (100 MHz, CDCl<sub>3</sub>):  $\delta = 176.5, 171.3, 139.0, 134.5, 128.6, 128.2, 58.3, 54.6, 52.4, 43.3, 38.1, 37.2, 33.8, 33.7, 33.6, 33.3, 33.2, 32.1, 30.0, 29.9, 29.0, 28.9, 26.72, 26.68, 23.3, 22.8, 22.7, 14.31, 14.26$  ppm; accurate mass (ESI) calcd for [C<sub>40</sub>H<sub>70</sub>N<sub>4</sub>O<sub>3</sub> + Na]<sup>+</sup>: 677.5340; found: 677.5357.

Compound **14**: KOH (2.50 mL, 2.5 M) was added to compound **24** (0.37 g, 0.57 mmol) in THF/MeOH ( $v/v = 1/1$ , 20 mL). The reaction mixture was heated to reflux for 12 h. After cooling down to room temperature, the solution was quenched with aqueous HCl (10 mL, 1.2 M) and extracted with Et<sub>2</sub>O (3 × 20 mL). The combined extracts were dried with Na<sub>2</sub>SO<sub>4</sub>, filtered and concentrated *in vacuo* to give a pale yellow oil which was purified by chromatography (eluent: hexane/EtOAc/HOAc = 240/30/1) to afford the target compound **14** (0.29 g, 80%) as a colorless oil.  $R_f = 0.25$ ; <sup>1</sup>H NMR (400 MHz, CDCl<sub>3</sub>, CO<sub>2</sub>H signal too broad to be observed):  $\delta = 7.32$ –7.27 (m, ArH, 4 H), 6.85 (br s, NH, 1 H), 4.53 (d, NHCH<sub>2</sub>Ar,  $J = 5.6$  Hz, 2 H), 4.34 (s, ArCH<sub>2</sub>N<sub>3</sub>, 2 H), 2.12–2.01 (m, CCH<sub>2</sub>, 2 H), 1.63–1.57 (m, CCH<sub>2</sub>, 2 H), 1.30–1.17 (m, 42 H), 0.90–0.87 (m, CH<sub>3</sub>, 12 H); <sup>13</sup>C NMR (100 MHz, CDCl<sub>3</sub>):  $\delta = 176.1, 175.3, 137.4, 135.3, 128.8, 128.3, 56.6, 54.5, 43.7, 40.1, 37.3, 33.9, 33.6, 33.2, 32.1, 29.9, 29.0, 28.9, 26.8, 26.7, 23.2, 22.8, 22.7, 14.30, 14.26$  ppm; accurate mass (ESI) calcd for [C<sub>39</sub>H<sub>68</sub>N<sub>4</sub>O<sub>3</sub> – H]<sup>–</sup>: 639.5219; found: 639.5219.

Compound **25**: Sodium ascorbate (0.23 g, 1.11 mmol) and CuSO<sub>4</sub>·5H<sub>2</sub>O (0.15 g, 0.46 mmol) were added to a solution of compound **24** (1.50 g, 2.29 mmol) and **23** (1.23 g, 2.29 mmol) in THF/H<sub>2</sub>O ( $v/v = 9/1$ , 30 mL). The mixture was stirred at 25 °C for 12 h. Aqueous HCl (20 mL, 0.2 M) was poured into the solution and the reaction mixture was extracted with DCM (3 × 20 mL). The combined organic layers were washed with



H<sub>2</sub>O (2 × 20 mL), dried over Na<sub>2</sub>SO<sub>4</sub>, filtered, and concentrated *in vacuo*. Chromatography of the residue over silica gel (eluent: hexane/EtOAc/HOAc = 150/100/1) afforded compound **25** as a white solid (1.82 g, 67%). *R<sub>f</sub>* = 0.35; M.p. 59–64 °C; <sup>1</sup>H NMR (400 MHz, CDCl<sub>3</sub>, CO<sub>2</sub>H signal too broad to be observed): δ = 8.49 (t, NH, *J* = 5.3 Hz, 1 H), 8.04 (br s, NH, 1 H), 7.46 (s, TriazH, 1 H), 7.31–7.20 (m, ArH, 4 H), 5.45 (s, ArCH<sub>2</sub>Triaz, 2 H), 4.53–4.49 (m, NHCH<sub>2</sub>Triaz and NHCH<sub>2</sub>Ar, 4 H), 3.73 (s, OCH<sub>3</sub>, 3 H), 2.05–1.95 (m, CCH<sub>2</sub>, 4 H), 1.78–1.72 (m, CCH<sub>2</sub>, 4 H), 1.24–1.00 (m, 84 H), 0.89–0.84 (m, CH<sub>3</sub>, 24 H); <sup>13</sup>C NMR (100 MHz, CDCl<sub>3</sub>): δ = 176.5, 171.5, 144.5, 139.8, 133.0, 128.6, 128.5, 122.5, 58.3, 57.2, 54.3, 52.4, 43.2, 38.5, 38.2, 37.19, 37.18, 37.09, 37.07, 34.3, 33.9, 33.7, 33.59, 33.57, 33.5, 33.3, 33.2, 33.1, 32.10, 32.08, 29.96, 29.9, 28.92, 28.89, 26.72, 26.69, 26.6, 23.29, 23.27, 23.25, 22.8, 22.7, 22.6, 22.45, 22.42, 14.34, 14.29 ppm; accurate mass (ESI) calcd for [C<sub>74</sub>H<sub>133</sub>N<sub>5</sub>O<sub>6</sub> – H]<sup>–</sup>: 1187.0183; found: 1187.0183.

Compound **26**: COMU (0.26 g, 0.60 mmol) and DIPEA (0.20 mL, 1.10 mmol) were added in succession to a stirred solution of compound **25** (0.65 g, 0.55 mmol) in DCM (20 mL) under nitrogen at 0 °C. After 10 min, 4-(azidomethyl)benzylamine (0.27 g, 1.64 mmol) was added to the mixture. The reaction solution was allowed to stir at 25 °C for 12 h. H<sub>2</sub>O (5 mL) was poured into the solution and the reaction mixture was extracted with DCM (3 × 20 mL). The combined organic layers were washed with saturated NaHCO<sub>3</sub> (2 × 10 mL), saturated NaHSO<sub>4</sub> (2 × 10 mL), dried over Na<sub>2</sub>SO<sub>4</sub>, filtered, and concentrated *in vacuo*. Chromatography of the residue over silica gel (eluent: hexane/EtOAc = 2.5/1) afforded compound **26** as a colorless liquid (0.70 g, 96%). *R<sub>f</sub>* = 0.32; <sup>1</sup>H NMR (400 MHz, CDCl<sub>3</sub>): δ = 8.44 (t, NH, *J* = 5.4 Hz, 1 H), 7.77 (t, NH, *J* = 5.5 Hz, 1 H), 7.46 (t, NH, *J* = 5.3 Hz, 1 H), 7.40 (s, TriazH, 1 H), 7.29–7.19 (m, ArH, 8 H), 5.44 (s, ArCH<sub>2</sub>Triaz, 2 H), 4.50–4.45 (m, NHCH<sub>2</sub>Triaz and NHCH<sub>2</sub>Ar, 6 H), 4.31 (s, N<sub>3</sub>CH<sub>2</sub>Ar, 2 H), 3.72 (s, OCH<sub>3</sub>, 3 H), 2.04–1.98 (m, CCH<sub>2</sub>, 2 H), 1.90–1.84 (m, CCH<sub>2</sub>, 2 H), 1.77–1.67 (m, CCH<sub>2</sub>, 4 H), 1.29–0.99 (m, 84 H), 0.89–0.86 (m, CH<sub>3</sub>, 24 H); <sup>13</sup>C NMR (100 MHz, CDCl<sub>3</sub>): δ = 176.5, 174.0, 172.9, 171.4, 144.8, 139.6, 138.7, 134.6, 133.6, 128.6, 128.5, 128.4, 128.2, 121.8, 58.3, 57.2, 54.6, 54.0, 52.4, 43.3,

43.2, 38.1, 37.2, 37.12, 37.09, 35.4, 34.1, 33.73, 33.71, 33.65, 33.59, 33.3, 33.2, 32.10, 32.07, 29.95, 29.93, 28.94, 28.92, 26.73, 26.70, 26.66, 23.3, 22.8, 22.7, 22.6, 22.3, 22.2, 14.33, 14.32, 14.27 ppm; accurate mass (ESI) calcd for  $[C_{82}H_{141}N_9O_5 - H]^-$ : 1355.0948; found: 1355.0951.

Compound **15**: KOH (0.50 mL, 2.5 M) was added to compound **26** (0.29 g, 0.22 mmol) in THF/MeOH ( $v/v = 1/1$ , 30 mL). The reaction mixture was heated to reflux and stirred for 12 h. After cooling down to room temperature, the solution was quenched with aqueous HCl (10 mL, 1.2 M) and extracted with DCM ( $3 \times 15$  mL). The combined extracts were dried with  $Na_2SO_4$ , filtered and concentrated *in vacuo* to give a pale yellow oil which was purified by chromatography (eluent: hexane/EtOAc/HOAc = 250/100/1) to afford the target compound **15** (0.27 g, 95%) as a colorless liquid.  $R_f = 0.24$ ;  $^1H$  NMR (400 MHz,  $CDCl_3$ ,  $CO_2H$  signal too broad to be observed):  $\delta = 7.67$ – $7.64$  (m, NH, 2 H), 7.41 (s, TriazH, 1 H), 7.27–7.20 (m, ArH, 8 H), 7.03 (br s, NH, 1 H), 5.44 (s, Ar $CH_2$ Triaz, 2 H), 4.50–4.47 (m, NHCH $_2$ Ar, 4 H), 4.44 (d, NHCH $_2$ Triaz,  $J = 5.6$  Hz, 2 H), 4.31 (s, N $_3$ CH $_2$ Ar, 2 H), 2.08–2.02 (m, CCH $_2$ , 2 H), 1.88–1.64 (m, CCH $_2$ , 6 H), 1.25–1.17 (m, 84 H), 0.89–0.85 (m, CH $_3$ , 24 H);  $^{13}C$  NMR (100 MHz,  $CDCl_3$ ):  $\delta = 177.1, 174.2, 173.9, 172.9, 144.7, 139.2, 138.5, 134.5, 133.4, 128.5, 128.4, 128.3, 128.0, 122.1, 57.3, 57.0, 54.4, 54.0, 43.2, 38.6, 37.7, 37.2, 37.1, 34.6, 34.0, 33.9, 33.6, 33.5, 33.14, 33.08, 32.0, 31.98, 29.9, 28.8, 26.6, 23.2, 22.7, 22.6, 22.1, 14.23, 14.17$  ppm; accurate mass (ESI) calcd for  $[C_{81}H_{139}N_9O_5 - H]^-$ : 1317.0826; found: 1317.0827.

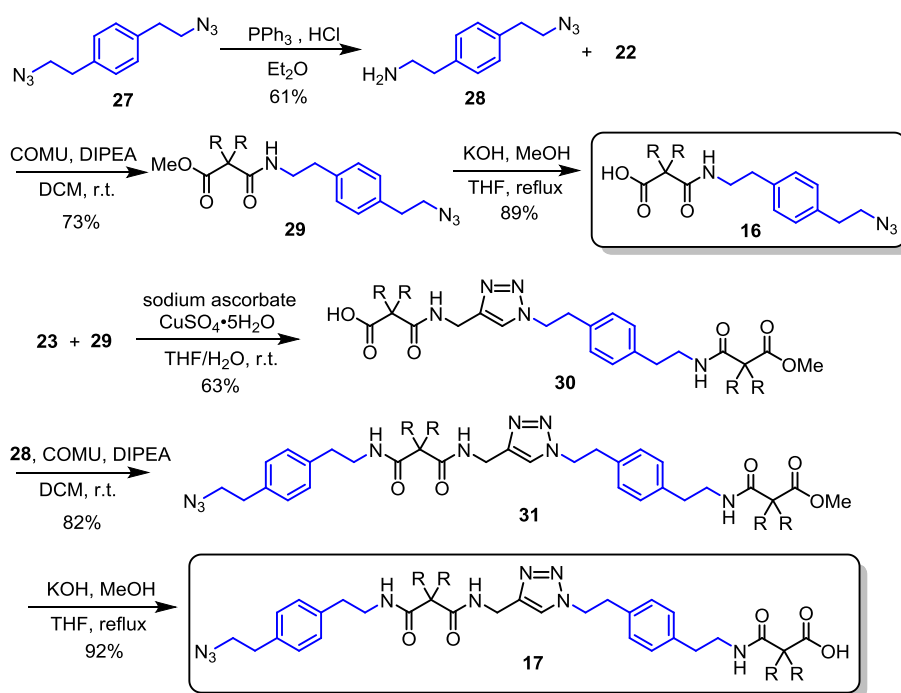

Compound **28**:  $\text{PPh}_3$  (2.89 g, 11.02 mmol) was added to a mixture of 1,4-bis-(2-azidoethyl)benzene **27**<sup>3</sup> (1.59 g, 8.45 mmol) in  $\text{Et}_2\text{O}$  (40 mL) and  $\text{HCl}$  (30 mL, 1 M) and the heterogeneous mixture was stirred vigorously at 25 °C for 24 h. The organic layer was then separated and the aqueous layer was extracted with  $\text{Et}_2\text{O}$  ( $3 \times 50$  mL) to remove the  $\text{Ph}_3\text{PO}$  and remaining starting materials. The pH of the aqueous layer was adjusted to 10 by adding  $\text{KOH}$  solution (2.5 M) and then extracted with  $\text{DCM}$  ( $4 \times 50$  mL). The combined extracts were washed with brine, dried  $\text{Mg}_2\text{SO}_4$ , filtered and evaporated in vacuo to give the product **28** as a pale yellow oil (0.84 g, 61%). It was used in the next reaction without further purification.

Compound **29**: COMU (2.62 g, 6.10 mmol) and DIPEA (1.32 g, 0.01 mol) were added in succession to a stirred solution of **22** (2.60 g, 5 mmol) in  $\text{DCM}$  (40 mL) at 0 °C. After 10 min, compound **28** (1.45 g, 7.64 mmol) was added to the mixture. The reaction solution was allowed to stir at 25 °C for 24 h.  $\text{H}_2\text{O}$  (10 mL) was poured to the solution and the reaction mixture was extracted with  $\text{DCM}$  ( $3 \times 30$  mL). The combined organic

<sup>3</sup> Schulz, M.; Christoffers, J. *Tetrahedron* **2013**, *69*, 802.

layers were washed with saturated NaHCO<sub>3</sub> (2 × 20 mL), saturated NaHSO<sub>4</sub> (2 × 20 mL), dried over Na<sub>2</sub>SO<sub>4</sub>, filtered, and concentrated *in vacuo*. Chromatography of the residue over silica gel (eluent: hexane/EtOAc = 15/1) afforded **29** as a colorless liquid (2.50 g, 73%). *R*<sub>f</sub> = 0.25; <sup>1</sup>H NMR (400 MHz, CDCl<sub>3</sub>): δ = 7.98 (t, NH, *J* = 5.6 Hz, 1 H), 7.18–7.13 (m, ArH, 4 H), 3.70 (s, OCH<sub>3</sub>, 3 H), 3.55–3.47 (m, NHCH<sub>2</sub>CH<sub>2</sub> and CH<sub>2</sub>CH<sub>2</sub>N<sub>3</sub>, 4 H), 2.88–2.79 (m, CH<sub>2</sub>CH<sub>2</sub>Ar, 4 H), 2.00–1.93 (m, CCH<sub>2</sub>, 2 H), 1.73–1.66 (m, CCH<sub>2</sub>, 2 H), 1.25–1.17 (m, 42 H), 0.88–0.85 (m, CH<sub>2</sub>CH<sub>3</sub>, 12 H); <sup>13</sup>C NMR (100 MHz, CDCl<sub>3</sub>): δ = 176.3, 171.2, 137.8, 136.1, 129.1, 129.0, 58.1, 52.6, 52.3, 41.1, 37.7, 37.1, 35.6, 35.1, 33.8, 33.7, 33.6, 33.34, 33.27, 32.1, 30.0, 29.8, 28.94, 28.91, 26.70, 26.67, 23.3, 22.8, 22.5, 14.30, 14.25 ppm; accurate mass (ESI) calcd for [C<sub>42</sub>H<sub>74</sub>N<sub>4</sub>O<sub>3</sub> + Na]<sup>+</sup>: 705.5653; found: 705.5647.

Compound **16**: KOH (17 mL, 2.5 M) was added to compound **29** (5.94 g, 8.70 mmol) in THF/MeOH (*v/v* = 1/1, 100 mL). The reaction mixture was heated to reflux and stirred for 12 h. After cooling down to room temperature, the solution was quenched with aqueous HCl (40 mL, 1.2 M) and extracted with Et<sub>2</sub>O (3 × 30 mL). The combined extracts were dried with Na<sub>2</sub>SO<sub>4</sub>, filtered and concentrated *in vacuo* to give a pale yellow oil which was purified by chromatography (eluent: hexane/EtOAc/HOAc = 240/30/1) to afford the target compound **16** (5.20 g, 89%) as a colorless oil. *R*<sub>f</sub> = 0.22; <sup>1</sup>H NMR (400 MHz, CDCl<sub>3</sub>, CO<sub>2</sub>H signal too broad to be observed): δ = 7.20–7.13 (m, ArH, 4 H), 6.40 (br s, NH, 1 H), 3.55–3.47 (q, NHCH<sub>2</sub>CH<sub>2</sub>, *J* ~ 6.4 Hz, 2 H), 3.49 (t, CH<sub>2</sub>CH<sub>2</sub>N<sub>3</sub>, *J* = 7.0 Hz, 2 H), 2.88 (t, ArCH<sub>2</sub>CH<sub>2</sub>, *J* = 7.0 Hz, 2 H), 2.83 (t, CH<sub>2</sub>CH<sub>2</sub>Ar, *J* = 6.9 Hz, 2 H), 2.07–2.01 (m, CCH<sub>2</sub>, 2 H), 1.46–1.40 (m, CCH<sub>2</sub>, 2 H), 1.23–1.07 (m, 42 H), 0.88–0.85 (m, CH<sub>2</sub>CH<sub>3</sub>, 12 H); <sup>13</sup>C NMR (100 MHz, CDCl<sub>3</sub>): δ = 176.4, 175.7, 136.8, 136.7, 129.3, 129.0, 56.3, 52.5, 41.3, 39.9, 37.23, 37.22, 35.2, 35.1, 33.8, 33.6, 33.18, 33.16, 32.0, 29.9, 28.89, 28.85, 26.7, 26.6, 23.2, 22.8, 22.7, 22.6, 14.3, 14.2 ppm; accurate mass (ESI) calcd for [C<sub>41</sub>H<sub>72</sub>N<sub>4</sub>O<sub>3</sub> – H]<sup>–</sup>: 667.5532; found: 667.5534.

Compound **30**: Sodium ascorbate (0.074 g, 0.37 mmol) and CuSO<sub>4</sub>·5H<sub>2</sub>O (0.02 g, 0.08 mmol) were added to a solution of compounds **29** (0.28 g, 0.41 mmol) and **23** (0.20 g,

0.38 mmol) in THF/H<sub>2</sub>O (v/v = 9/1, 15 mL). The mixture was stirred at 25 °C for 12 h. Aqueous HCl (10 mL, 0.2 M) was poured into the solution and the reaction mixture was extracted with DCM (3 × 10 mL). The combined organic layers were washed with H<sub>2</sub>O (2 × 10 mL), dried over Na<sub>2</sub>SO<sub>4</sub>, filtered, and concentrated *in vacuo*. Chromatography of the residue over silica gel (eluent: hexane/EtOAc/HOAc = 150/100/1) afforded compound **30** as a colorless liquid (0.29 g, 63%). *R<sub>f</sub>* = 0.32; <sup>1</sup>H NMR (400 MHz, CDCl<sub>3</sub>, CO<sub>2</sub>H signal too broad to be observed): δ = 8.70 (br s, NH, 1 H), 8.22 (t, NH, *J* = 5.4 Hz, 1 H), 7.28 (s, TriazH, 1 H), 7.14 (d, ArH, *J* = 7.9 Hz, 2 H), 6.98 (d, *J* = 7.9 Hz, ArH, 2 H), 4.51–4.48 (m, TriazCH<sub>2</sub>CH<sub>2</sub> and NHCH<sub>2</sub>Triaz, 4 H), 3.70 (s, OCH<sub>3</sub>, 3 H), 3.52 (q, CH<sub>2</sub>CH<sub>2</sub>NH, *J* ~ 6.9 Hz, 2 H), 3.13 (t, ArCH<sub>2</sub>, *J* = 7.1 Hz, 2 H), 2.80 (t, ArCH<sub>2</sub>, *J* = 7.4 Hz, 2 H), 1.99–1.68 (m, 8 H), 1.21–1.12 (m, 84 H), 0.86–0.84 (m, CH<sub>2</sub>CH<sub>3</sub>, 24 H); <sup>13</sup>C NMR (100 MHz, CDCl<sub>3</sub>): δ = 177.3, 176.3, 173.2, 171.5, 144.3, 138.1, 134.7, 129.3, 128.8, 123.0, 58.1, 57.4, 52.3, 52.1, 41.1, 38.1, 37.8, 37.2, 37.1, 36.4, 35.6, 34.1, 34.0, 33.70, 33.66, 33.62, 33.58, 33.3, 33.19, 33.16, 33.1, 32.1, 32.0, 29.92, 29.91, 28.89, 28.86, 26.68, 26.65, 26.6, 23.2, 22.8, 22.5, 22.4, 14.29, 14.26, 14.23, 14.22 ppm; accurate mass (ESI) calcd for [C<sub>76</sub>H<sub>137</sub>N<sub>5</sub>O<sub>6</sub> + Na]<sup>+</sup>: 1239.0461; found: 1239.0463.

Compound **31**: COMU (0.13 g, 0.30 mmol) and DIPEA (0.10 mL, 0.57 mmol) were added in succession to a stirred solution of compound **30** (0.29 g, 0.24 mmol) in DCM (10 mL) under nitrogen at 0 °C. After 10 min, 4-(azidoethyl)phenethylamine **28** (0.18 g, 0.96 mmol) was added to the mixture. The reaction solution was allowed to stir at 25 °C for 12 h. H<sub>2</sub>O (5 mL) was poured into the solution and the reaction mixture was extracted with DCM (3 × 10 mL). The combined organic layers were washed with saturated NaHCO<sub>3</sub> (2 × 10 mL), saturated NaHSO<sub>4</sub> (2 × 10 mL), dried over Na<sub>2</sub>SO<sub>4</sub>, filtered, and concentrated *in vacuo*. Chromatography of the residue over silica gel (eluent: hexane/EtOAc = 2/1) afforded compound **31** as a colorless liquid (0.27 g, 82%). *R<sub>f</sub>* = 0.35; <sup>1</sup>H NMR (400 MHz, CDCl<sub>3</sub>): δ = 8.05 (t, NH, *J* = 5.6 Hz, 1 H), 7.76 (t, NH, *J* = 5.4 Hz, 1 H), 7.35 (s, TriazH, 1 H), 7.17–7.05 (m, ArH and NH, 9 H), 4.52–4.48 (m, TriazCH<sub>2</sub>CH<sub>2</sub> and NHCH<sub>2</sub>Triaz, 4 H), 3.70 (s, OCH<sub>3</sub>, 3 H), 3.52–3.46 (m, CH<sub>2</sub>CH<sub>2</sub>NH

and  $\text{N}_3\text{CH}_2\text{CH}_2$ , 6 H), 3.15 (t,  $\text{ArCH}_2$ ,  $J = 7.8$  Hz, 2 H), 2.90–2.73 (m, 6 H), 2.00–1.94 (m,  $\text{CCH}_2$ , 2 H), 1.74–1.71 (m,  $\text{CCH}_2$ , 6 H), 1.22–1.17 (m, 84 H), 0.88–0.84 (m,  $\text{CH}_2\text{CH}_3$ , 24 H);  $^{13}\text{C}$  NMR (100 MHz,  $\text{CDCl}_3$ ):  $\delta = 176.4, 173.6, 173.2, 171.2, 144.6, 138.2, 137.5, 136.4, 135.0, 129.4, 129.2, 129.1, 128.9, 122.0, 58.2, 57.2, 52.6, 52.3, 51.8, 41.12, 41.04, 37.9, 37.8, 37.3, 37.1, 36.6, 35.7, 35.6, 35.3, 35.1, 34.1, 33.8, 33.73, 33.68, 33.35, 33.27, 32.1, 30.0, 29.8, 28.95, 28.92, 26.74, 26.71, 26.67, 23.3, 22.8, 22.5, 22.2, 14.31, 14.26$  ppm; accurate mass (ESI) calcd for  $[\text{C}_{86}\text{H}_{149}\text{N}_9\text{O}_5 + \text{Na}]^+$ : 1411.1574; found: 1411.1564.

Compound **17**: KOH (0.50 mL, 2.5 M) was added to compound **31** (0.27 g, 0.19 mmol) in THF/MeOH ( $v/v = 1/1$ , 20 mL). The reaction mixture was heated to reflux and stirred for 12 h. After cooling down to room temperature, the solution was quenched with aqueous HCl (10 mL, 1.2 M) and extracted with DCM ( $3 \times 10$  mL). The combined extracts were dried with  $\text{Na}_2\text{SO}_4$ , filtered and concentrated *in vacuo* to give a pale yellow oil which was purified by chromatography (eluent: hexane/EtOAc/HOAc = 150/100/1) to afford the target compound **17** (0.24 g, 92%) as a colorless oil.  $R_f = 0.24$ ;  $^1\text{H}$  NMR (400 MHz,  $\text{CDCl}_3$ ,  $\text{CO}_2\text{H}$  signal too broad to be observed):  $\delta = 8.63$  (br s, NH, 1 H), 7.64 (br s, NH, 1 H), 7.17–7.01 (m, TriazH and ArH, 7 H), 6.89 (d, ArH,  $J = 7.8$  Hz, 2 H), 6.53 (br s, NH, 1 H), 4.55 (t, Triaz $\text{CH}_2\text{CH}_2$ ,  $J = 6.1$  Hz, 2 H), 4.46 (d,  $\text{NHCH}_2\text{Triaz}$ ,  $J = 5.6$  Hz, 2 H), 3.63 (q,  $\text{CH}_2\text{CH}_2\text{NH}$ ,  $J \sim 5.9$  Hz, 2 H), 3.50–3.45 (m,  $\text{CH}_2\text{CH}_2\text{NH}$ , 4 H), 3.10 (t,  $\text{ArCH}_2$ ,  $J = 6.1$  Hz, 2 H), 2.86 (t,  $\text{ArCH}_2$ ,  $J = 7.1$  Hz, 2 H), 2.80–2.73 (m,  $\text{ArCH}_2$ , 4 H), 1.83–1.81 (m,  $\text{CCH}_2$ , 6 H), 1.58–1.51 (m,  $\text{CCH}_2$ , 2 H), 1.22–1.18 (m, 84 H), 0.88–0.85 (m,  $\text{CH}_2\text{CH}_3$ , 24 H);  $^{13}\text{C}$  NMR (100 MHz,  $\text{CDCl}_3$ ):  $\delta = 177.0, 173.8, 173.4, 143.9, 137.9, 137.3, 136.5, 135.5, 129.3, 129.24, 129.15, 129.06, 123.1, 57.3, 57.0, 52.6, 52.0, 41.0, 40.3, 39.0, 38.0, 37.4, 37.34, 37.28, 37.25, 36.7, 35.5, 35.3, 35.1, 35.0, 34.1, 33.8, 33.7, 33.6, 33.32, 33.28, 33.2, 32.1, 30.0, 28.95, 28.88, 26.8, 26.72, 26.68, 23.29, 23.27, 22.8, 22.2, 22.1, 14.32, 14.26$  ppm; accurate mass (ESI) calcd for  $[\text{C}_{85}\text{H}_{147}\text{N}_9\text{O}_5 + \text{Na}]^+$ : 1397.1417; found: 1397.1413.

(b) Synthesis of **OAT-CO<sub>2</sub>H-2n**, **OAT-COPrg(2n+1)** and **OAT-H-2n**

**OAT-CO<sub>2</sub>H-2**: Sodium ascorbate (44 mg, 0.22 mmol) and CuSO<sub>4</sub>·5H<sub>2</sub>O (12 mg, 0.05 mmol) were added to a solution of compound **14** (0.29 g, 0.44 mmol) and **13** (0.31 g, 0.57 mmol) in THF/H<sub>2</sub>O (v/v = 9/1, 20 mL). The mixture was stirred at 25 °C for 12 h. Aqueous HCl (10 mL, 0.2 M) was poured into the solution and the reaction mixture was extracted with DCM (3 × 20 mL). The combined organic layers were washed with H<sub>2</sub>O (2 × 10 mL), dried over Na<sub>2</sub>SO<sub>4</sub>, filtered, and concentrated *in vacuo*. Chromatography of the residue over silica gel (eluent: hexane/EtOAc/HOAc = 150/100/1) afforded **OAT-CO<sub>2</sub>H-2** as a colorless oil (0.45 g, 86%). *R<sub>f</sub>* = 0.28; <sup>1</sup>H NMR (400 MHz, CDCl<sub>3</sub>, CO<sub>2</sub>H signal too broad to be observed): δ = 8.47 (t, NH, *J* = 5.4 Hz, 1 H), 7.45 (s, TriazH, 1 H), 7.34 (br s, NH, 1 H), 7.28–7.20 (m, ArH, 4 H), 5.44 (s, ArCH<sub>2</sub>Triaz, 2 H), 4.51–4.49 (d, NHCH<sub>2</sub>Triaz and NHCH<sub>2</sub>Ar, 4 H), 3.69 (s, OCH<sub>3</sub>, 3 H), 2.03–1.88 (m, CCH<sub>2</sub>, 4 H), 1.76–1.69 (m, CCH<sub>2</sub>, 4 H), 1.25–1.17 (m, 84 H), 0.89–0.86 (m, CH<sub>3</sub>, 24 H); <sup>13</sup>C NMR (100 MHz, CDCl<sub>3</sub>): δ = 175.7, 175.5, 175.4, 171.8, 145.3, 138.4, 134.2, 128.63, 128.58, 122.4, 58.1, 56.9, 53.9, 52.4, 43.6, 39.5, 37.4, 37.28, 37.25, 37.03, 37.00, 35.2, 33.91, 33.89, 33.80, 33.77, 33.7, 33.62, 33.56, 33.24, 33.21, 33.16, 32.1, 29.9, 29.8, 28.95, 28.91, 28.87, 26.74, 26.72, 26.68, 26.6, 23.2, 22.8, 22.72, 22.66, 22.4, 22.3, 14.31, 14.26 ppm; accurate mass (ESI) calcd for [C<sub>74</sub>H<sub>133</sub>N<sub>5</sub>O<sub>6</sub> – H]<sup>–</sup>: 1187.0183; found: 1187.0179.

**OAT-COPrg-3**: EDCI (0.95 g, 3.20 mmol) and HOBt (0.44 g, 3.20 mmol) were added in succession to a stirred solution of **OAT-CO<sub>2</sub>H-2** (2.54 g, 2.14 mmol) in DCM (20 mL) at 0 °C. After 10 min, propargylamine (0.30 mL, 4.27 mmol) was added to the mixture. The reaction solution was allowed to stir at 25 °C for 12 h. H<sub>2</sub>O (10 mL) was poured to the solution and the reaction mixture was extracted with DCM (3 × 30 mL). The combined organic layers were washed with saturated NaHCO<sub>3</sub> (2 × 20 mL), saturated NaHSO<sub>4</sub> (2 × 20 mL), dried over Na<sub>2</sub>SO<sub>4</sub>, filtered, and concentrated *in vacuo*. Chromatography of the residue over silica gel (eluent: hexane/EtOAc = 3/1) afforded **OAT-COPrg-3** as a pale yellow oil (1.70 g, 65%). *R<sub>f</sub>* = 0.35; <sup>1</sup>H NMR (400 MHz, CDCl<sub>3</sub>): δ = 8.36 (t, NH, *J* = 5.3 Hz, 1 H), 7.62 (t, NH, *J* = 5.5 Hz, 1 H), 7.44 (s, TriazH,

1 H), 7.31 (br s, NH, 1 H), 7.31–7.19 (m, ArH, 4 H), 5.45 (s, ArCH<sub>2</sub>Triaz, 2 H), 4.52 (d, NHCH<sub>2</sub>Ar, *J* = 5.4 Hz, 2 H), 4.46 (d, NHCH<sub>2</sub>Triaz, *J* = 5.5 Hz, 2 H), 4.04 (dd, CH≡CCH<sub>2</sub>, *J* = 5.1 and 2.4 Hz, 2 H), 3.70 (s, OCH<sub>3</sub>, 3 H), 2.19 (t, *J* = 2.4 Hz, C≡CH, 1 H), 1.97–1.69 (m, CCH<sub>2</sub>, 8 H), 1.29–1.00 (m, 84 H), 0.89–0.86 (m, CH<sub>3</sub>, 24 H). <sup>13</sup>C NMR (100 MHz, CDCl<sub>3</sub>): δ = 175.7, 173.5, 173.1, 171.5, 145.4, 139.1, 133.9, 128.5, 128.4, 122.1, 79.4, 71.6, 58.1, 57.2, 53.9, 52.4, 43.4, 38.5, 37.4, 37.28, 37.27, 37.03, 37.01, 35.4, 34.0, 33.8, 33.7, 33.6, 33.26, 33.18, 32.1, 29.9, 29.4, 29.0, 28.91, 28.88, 26.74, 26.73, 26.7, 26.6, 23.3, 22.8, 22.39, 22.36, 22.23, 22.20, 14.30, 14.25 ppm; accurate mass (ESI) calcd for [C<sub>77</sub>H<sub>136</sub>N<sub>6</sub>O<sub>5</sub> + Na]<sup>+</sup>: 1248.0464; found: 1248.0461.

**OAT-CO<sub>2</sub>H-4**: Sodium ascorbate (0.13 g, 0.66 mmol) and CuSO<sub>4</sub>·5H<sub>2</sub>O (0.04 g, 0.13 mmol) were added to a solution of **OAT-COPrg-3** (1.6 g, 1.31 mmol) and compound **14** (0.86 g, 1.31 mmol) in THF/H<sub>2</sub>O (*v/v* = 9/1, 30 mL). The mixture was stirred at 25 °C for 12h. Aqueous HCl (20 mL, 0.2 M) was poured into the solution and the reaction mixture was extracted with DCM (3 × 30 mL). The combined organic layers were washed with H<sub>2</sub>O (2 × 20 mL), dried over Na<sub>2</sub>SO<sub>4</sub>, filtered, and concentrated *in vacuo*. Chromatography of the residue over silica gel (eluent: hexane/EtOAc/HOAc = 300/200/1) afforded **OAT-CO<sub>2</sub>H-4** as a white solid (1.90 g, 79%). *R*<sub>f</sub> = 0.25; M.p. 69–73 °C; <sup>1</sup>H NMR (400 MHz, CDCl<sub>3</sub>, CO<sub>2</sub>H signal too broad to be observed): δ = 8.48 (t, NH, *J* = 5.3 Hz, 1 H), 8.13 (br s, NH, 1 H), 8.07 (br s, NH, 1 H), 7.56 (br s, NH, 1 H), 7.50 (s, TriazH, 1 H), 7.41 (s, TriazH, 1 H), 7.29–7.16 (m, ArH, 8 H), 5.43 (s, TriazCH<sub>2</sub>Ar, 2 H), 5.42 (s, TriazCH<sub>2</sub>Ar, 2 H), 4.50–4.41 (m, NHCH<sub>2</sub>Triaz and ArCH<sub>2</sub>NH, 8 H), 3.68 (s, OCH<sub>3</sub>, 3 H), 1.96–1.89 (m, CCH<sub>2</sub>, 8 H), 1.77–1.72 (m, CCH<sub>2</sub>, 4 H), 1.24–1.00 (m, 126 H), 0.89–0.85 (m, CH<sub>3</sub>, 36 H); <sup>13</sup>C NMR (100 MHz, CDCl<sub>3</sub>): δ = 177.2, 175.4, 174.2, 173.5, 172.8, 171.7, 145.1, 144.6, 139.4, 139.3, 133.5, 133.3, 128.32, 128.26, 128.2, 122.3, 121.9, 58.0, 57.4, 57.1, 53.9, 52.2, 43.1, 38.5, 37.7, 37.1, 37.0, 36.9, 35.0, 34.8, 33.9, 33.7, 33.6, 33.5, 33.4, 33.12, 33.08, 33.0, 31.9, 29.8, 28.8, 26.6, 26.5, 23.1, 22.7, 22.6, 22.13, 22.06, 14.2, 14.1 ppm; accurate mass (ESI) calcd for [C<sub>116</sub>H<sub>204</sub>N<sub>10</sub>O<sub>8</sub> + 2Na]<sup>2+</sup>: 956.2840; found: 956.2832.



**OAT-COPrg-5:** EDCI (0.51 g, 1.70 mmol) and HOBt (0.23 g, 1.70 mmol) were added in succession to a stirred solution of **OAT-CO<sub>2</sub>H-4** (2.01 g, 1.10 mmol) in DCM (30 mL) at 0 °C. After 10 min, propargylamine (0.15 mL, 2.20 mmol) was added to the mixture. The reaction solution was allowed to stir for 12 h at 25 °C. H<sub>2</sub>O (10 mL) was poured into the solution and the reaction mixture was extracted with DCM (3 × 30 mL). The combined organic layers were washed with saturated NaHCO<sub>3</sub> (2 × 20 mL), saturated NaHSO<sub>4</sub> (2 × 20 mL), dried over Na<sub>2</sub>SO<sub>4</sub>, filtered, and concentrated *in vacuo*. Chromatography of the residue over silica gel (eluent: hexane/EtOAc = 2/1) afforded **OAT-COPrg-5** as a white solid (1.60 g, 78%). *R<sub>f</sub>* = 0.25; M.p. 107–110 °C; <sup>1</sup>H NMR (400 MHz, CDCl<sub>3</sub>): δ = 8.36 (t, NH, *J* = 5.4 Hz, 1 H), 7.80 (t, NH, *J* = 5.3 Hz, 1 H), 7.71, (t, NH, *J* = 5.3 Hz, 1 H), 7.44 (s, TriazH, 1 H), 7.39 (s, TriazH, 1 H), 7.39 (br s, NH, 1 H), 7.27–7.17 (m, ArH and NH, 9 H), 5.443 (s, ArCH<sub>2</sub>Triaz, 2 H), 5.442 (s, ArCH<sub>2</sub>Triaz, 2 H), 4.52–4.42 (m, NHCH<sub>2</sub>Ar and NHCH<sub>2</sub>Triaz, 8 H), 4.04 (dd, CH=CCH<sub>2</sub>, *J* = 5.2 and 2.5 Hz, 2 H), 3.69 (s, OCH<sub>3</sub>, 3 H), 2.19 (t, *J* = 2.5 Hz, C≡CH, 1 H), 1.97–1.64 (m, CCH<sub>2</sub>, 12 H), 1.29–1.15 (m, 126 H), 0.89–0.85 (m, CH<sub>3</sub>, 36 H); <sup>13</sup>C NMR (100 MHz, CDCl<sub>3</sub>): δ = 175.7, 174.0, 173.5, 173.1, 172.9, 171.6, 145.4, 144.7, 139.3, 133.8, 133.7, 128.5, 128.40, 128.38, 122.2, 121.8, 79.4, 71.6, 58.1, 57.3, 57.2, 54.0, 53.9, 52.4, 43.32, 43.30, 38.4, 37.9, 37.34, 37.29, 37.27, 37.21, 37.02, 37.00, 35.36, 35.33, 34.0, 33.8, 33.65, 33.56, 33.3, 33.21, 33.20, 33.17, 32.1, 29.9, 29.4, 29.0, 28.91, 28.87, 26.74, 26.70, 26.6, 23.3, 22.8, 22.4, 22.3, 22.2, 14.31, 14.26 ppm; accurate mass (ESI) calcd for [C<sub>119</sub>H<sub>207</sub>N<sub>11</sub>O<sub>7</sub> + Na]<sup>+</sup>: 1926.6104; found: 1926.6097.

**OAT-CO<sub>2</sub>H-6:** Sodium ascorbate (81 mg, 0.41 mmol) and CuSO<sub>4</sub>·5H<sub>2</sub>O (30 mg, 0.12 mmol) were added to a solution of **OAT-COPrg-3** (1.01 g, 0.82 mmol) and **15** (1.30 g, 0.98 mmol) in THF/H<sub>2</sub>O (*v/v* = 9/1, 30 mL). The solution was stirred at 25 °C for 24 h. Aqueous HCl (20 mL, 0.2 M) was poured into the solution and the reaction mixture was extracted with DCM (3 × 30 mL). The combined organic layers were washed with H<sub>2</sub>O (2 × 20 mL), dried over Na<sub>2</sub>SO<sub>4</sub>, filtered, and concentrated *in vacuo*. Chromatography of the residue over silica gel (eluent: CHCl<sub>3</sub>/MeOH = 20/1) afforded **OAT-CO<sub>2</sub>H-6** as a white solid (1.85 g, 89%). *R<sub>f</sub>* = 0.35; M.p. 104–108 °C; <sup>1</sup>H NMR

(400 MHz, CDCl<sub>3</sub>, CO<sub>2</sub>H signal too broad to be observed):  $\delta$  = 8.40 (t, NH,  $J$  = 5.2 Hz, 1 H), 8.04 (br s, NH, 1 H), 7.93 (br s, NH, 1 H), 7.89 (br s, NH, 1 H), 7.68 (br s, NH, 1 H), 7.46–7.45 (m, NH and TriazH, 3 H), 7.40 (s, TriazH, 1 H), 7.28–7.16 (m, ArH, 12 H), 5.43–5.42 (m, TriazCH<sub>2</sub>Ar, 6 H), 4.51–4.41 (m, NHCH<sub>2</sub>Triaz and ArCH<sub>2</sub>NH, 12 H), 3.67 (s, OCH<sub>3</sub>, 3 H), 1.93–1.87 (m, CCH<sub>2</sub>, 12 H), 1.76–1.74 (m, CCH<sub>2</sub>, 4 H), 1.22–1.15 (m, 168 H), 0.89–0.85 (m, CH<sub>3</sub>, 48 H); <sup>13</sup>C NMR (100 MHz, CDCl<sub>3</sub>):  $\delta$  = 176.7, 175.6, 174.13, 174.06, 172.9, 172.8, 171.6, 145.3, 144.71, 144.68, 139.4, 139.22, 139.19, 133.7, 133.6, 133.5, 128.5, 128.42, 128.38, 128.37, 128.34, 128.31, 122.2, 122.0, 121.9, 58.1, 57.4, 57.22, 57.18, 54.0, 53.94, 53.89, 52.3, 43.26, 43.21, 38.6, 37.8, 37.6, 37.21, 37.18, 36.98, 36.96, 35.23, 35.15, 35.0, 34.0, 33.8, 33.7, 33.6, 33.5, 33.21, 33.17, 32.0, 29.9, 28.9, 26.7, 26.6, 23.2, 22.8, 22.6, 22.30, 22.26, 22.2, 14.3, 14.2 ppm; accurate mass (ESI) calcd for [C<sub>158</sub>H<sub>275</sub>N<sub>15</sub>O<sub>10</sub> – H + 2Na]<sup>+</sup>: 2589.1215; found: 2589.1205.

**OAT-COPrg-7**: COMU (0.21 g, 0.48 mmol) and DIPEA (0.14 mL, 0.80 mmol) were added in succession to a stirred solution of **OAT-CO<sub>2</sub>H-6** (1.01 g, 0.40 mmol) in DCM (30 mL) at 0 °C. After 10 min, propargylamine (0.25 mL, 4.10 mmol) was added to the mixture. The reaction solution was allowed to stir for 24 h at 25 °C. H<sub>2</sub>O (10 mL) was poured into the solution and the reaction mixture was extracted with DCM (3 × 30 mL). The combined organic layers were washed with saturated NaHCO<sub>3</sub> (2 × 20 mL), saturated NaHSO<sub>4</sub> (2 × 20 mL), dried over Na<sub>2</sub>SO<sub>4</sub>, filtered, and concentrated *in vacuo*. Chromatography of the residue over silica gel (eluent: CHCl<sub>3</sub>/MeOH = 25/1) afforded **OAT-COPrg-7** as a white solid (0.82 g, 80%).  $R_f$  = 0.31; M.p. 123–128 °C; <sup>1</sup>H NMR (400 MHz, CDCl<sub>3</sub>):  $\delta$  = 8.36 (t, NH,  $J$  = 5.3 Hz, 1 H), 7.89 (t, NH,  $J$  = 5.6 Hz, 1 H), 7.84 (t, NH,  $J$  = 5.4 Hz, 1 H), 7.77 (t, NH,  $J$  = 5.6 Hz, 1 H), 7.48 (br s, NH, 1 H), 7.44 (s, TriazH, 1 H), 7.40 (br s, NH and 2 TriazH, 3 H), 7.27–7.17 (m, NH and ArH, 13 H), 5.44 (s, ArCH<sub>2</sub>Triaz, 6 H), 4.52–4.42 (m, NHCH<sub>2</sub>Ar and NHCH<sub>2</sub>Triaz, 12 H), 4.04 (dd, CH≡CCH<sub>2</sub>,  $J$  = 5.2 and 2.5 Hz, 2 H), 3.69 (s, OCH<sub>3</sub>, 3 H), 2.19 (t,  $J$  = 2.5 Hz, C≡CH, 1 H), 1.97–1.74 (m, CCH<sub>2</sub>, 16 H), 1.22–1.15 (m, 168 H), 0.89–0.85 (m, CH<sub>3</sub>, 48 H); <sup>13</sup>C NMR (100 MHz, CDCl<sub>3</sub>):  $\delta$  = 175.7, 174.00, 173.97, 173.6, 173.1, 172.9, 171.5,

145.4, 144.70, 144.65, 139.5, 139.3, 133.8, 133.7, 133.6, 128.5, 128.40, 128.38, 122.1, 121.74, 121.71, 79.4, 71.6, 58.1, 57.25, 57.18, 53.95, 53.88, 52.4, 43.3, 38.3, 37.9, 37.34, 37.28, 37.2, 37.02, 36.99, 35.4, 34.0, 33.8, 33.65, 33.56, 33.3, 33.2, 32.1, 29.9, 29.4, 29.0, 28.90, 28.87, 26.7, 26.6, 23.3, 22.8, 22.4, 22.3, 22.2, 14.32, 14.26 ppm; accurate mass (ESI) calcd for  $[C_{161}H_{278}N_{16}O_9 + Na]^+$ : 2604.1712; found: 2604.1719.

**OAT-CO<sub>2</sub>H-8**: Sodium ascorbate (23 mg, 0.12 mmol) and CuSO<sub>4</sub>·5H<sub>2</sub>O (14 mg, 0.05 mmol) were added to a solution of **OAT-COPrg-5** (0.44 g, 0.24 mmol) and compound **15** (0.50 g, 0.38 mmol) in THF/H<sub>2</sub>O (v/v = 9/1, 20 mL). The mixture was stirred at 25 °C for 24 h. Aqueous HCl (10 mL, 0.2 M) was poured into the solution and the reaction mixture was extracted with DCM (3 × 20 mL). The combined organic layers were washed with H<sub>2</sub>O (2 × 10 mL), dried over Na<sub>2</sub>SO<sub>4</sub>, filtered, and concentrated *in vacuo*. Chromatography of the residue over silica gel (eluent: CHCl<sub>3</sub>/MeOH = 20/1) afforded **OAT-CO<sub>2</sub>H-8** as a white solid (0.74 g, 96%). *R<sub>f</sub>* = 0.31; M.p. 128–130 °C; <sup>1</sup>H NMR (400 MHz, CDCl<sub>3</sub>, CO<sub>2</sub>H signal too broad to be observed): δ = 8.39 (t, NH, *J* = 5.4 Hz, 1 H), 7.98 (br s, NH, 1 H), 7.89 (br s, NH, 1 H), 7.81 (br s, NH, 1 H), 7.74 (br s, NH, 1 H), 7.63 (br s, NH, 1 H), 7.58 (br s, NH, 1 H), 7.45 (s, TriazH, 1 H), 7.44 (s, TriazH, 1 H), 7.42 (s, TriazH, 1 H), 7.39 (br s, NH and TriazH, 2 H), 7.27–7.16 (m, ArH, 16 H), 5.43–5.42 (m, TriazCH<sub>2</sub>Ar, 8 H), 4.51–4.41 (m, NHCH<sub>2</sub>Triaz and ArCH<sub>2</sub>NH, 16 H), 3.68 (s, OCH<sub>3</sub>, 3 H), 1.97–1.87 (m, CCH<sub>2</sub>, 14 H), 1.76–1.74 (m, CCH<sub>2</sub>, 6 H), 1.21–1.15 (m, 210 H), 0.89–0.85 (m, CH<sub>3</sub>, 60 H); <sup>13</sup>C NMR (100 MHz, CDCl<sub>3</sub>): δ = 176.5, 175.6, 174.10, 174.07, 174.0, 172.94, 172.90, 172.8, 171.6, 145.3, 144.7, 139.5, 139.4, 139.3, 139.2, 133.74, 133.67, 133.6, 133.5, 128.5, 128.41, 128.39, 128.37, 128.3, 122.2, 122.0, 121.9, 58.1, 57.4, 57.3, 54.03, 53.97, 53.9, 52.3, 43.3, 43.2, 38.5, 37.8, 37.7, 37.4, 37.2, 37.01, 36.99, 35.3, 35.23, 35.15, 35.1, 34.1, 33.8, 33.63, 33.55, 33.24, 33.19, 32.1, 29.92, 28.89, 28.86, 26.7, 26.6, 23.2, 22.8, 22.6, 22.33, 22.29, 22.2, 22.1, 14.3, 14.2 ppm; accurate mass (ESI) calcd for  $[C_{200}H_{346}N_{20}O_{12} - H + 3Na]^{2+}$ : 1645.3373; found: 1645.3368.

**OAT-COPrg-9**: COMU (97 mg, 0.23 mmol) and DIPEA (0.07 mL, 0.38 mmol) were

added in succession to a stirred solution of **OAT-CO<sub>2</sub>H-8** (0.60 g, 0.19 mmol) in DCM (20 mL) at 0 °C. After 10 min, propargylamine (0.24 mL, 3.60 mmol) was added to the mixture. The reaction solution was allowed to stir at 25 °C for 48 h. H<sub>2</sub>O (5 mL) was poured into the solution and the reaction mixture was extracted with DCM (3 × 20 mL). The combined organic layers were washed with saturated NaHCO<sub>3</sub> (2 × 10 mL), saturated NaHSO<sub>4</sub> (2 × 10 mL), dried over Na<sub>2</sub>SO<sub>4</sub>, filtered, and concentrated *in vacuo*. Chromatography of the residue over silica gel (eluent: CHCl<sub>3</sub>/MeOH = 25/1) afforded **OAT-COPrg-9** as a white solid (0.49 g, 79%). *R<sub>f</sub>* = 0.28; M.p. 139–143 °C; <sup>1</sup>H NMR (400 MHz, CDCl<sub>3</sub>): δ = 8.35 (t, NH, *J* = 5.3 Hz, 1 H), 7.88 (br s, NH, 2 H), 7.82 (br s, NH, 2 H), 7.74 (t, NH, *J* = 5.6 Hz, 1 H), 7.49–7.42 (m, NH and TriazH, 3 H), 7.39–7.36 (m, NH and TriazH, 5 H), 7.25–7.17 (m, ArH, 16 H), 5.43 (br s, ArCH<sub>2</sub>Triaz, 8 H), 4.51–4.42 (m, NHCH<sub>2</sub>Ar and NHCH<sub>2</sub>Triaz, 16 H), 4.03 (dd, CH≡CCH<sub>2</sub>, *J* = 5.0 and 2.3 Hz, 2 H), 3.68 (s, OCH<sub>3</sub>, 3 H), 2.19 (t, C≡CH, *J* = 2.4 Hz, 1 H), 1.97–1.60 (m, CCH<sub>2</sub>, 20 H), 1.28–1.15 (m, 210 H), 0.88–0.84 (m, CH<sub>3</sub>, 60 H); <sup>13</sup>C NMR (100 MHz, CDCl<sub>3</sub>): δ = 175.6, 174.0, 173.6, 173.1, 172.9, 171.5, 145.3, 144.72, 144.67, 139.5, 139.34, 139.31, 133.8, 133.64, 133.58, 132.2, 132.11, 132.07, 132.04, 128.7, 128.5, 128.44, 128.37, 128.3, 122.1, 121.7, 79.4, 71.5, 58.1, 57.3, 57.2, 53.92, 53.86, 52.3, 43.3, 43.2, 38.2, 37.8, 37.3, 37.2, 37.01, 36.99, 35.33, 35.29, 34.0, 33.8, 33.64, 33.56, 33.25, 33.2, 32.0, 29.9, 29.3, 28.93, 28.89, 26.7, 26.6, 23.2, 22.8, 22.32, 22.28, 22.2, 14.3, 14.2 ppm; accurate mass (MALDI) calcd for [C<sub>203</sub>H<sub>349</sub>N<sub>21</sub>O<sub>11</sub> + Na]<sup>+</sup>: 3282.7351; found: 3282.7380.

**OAT-CO<sub>2</sub>H-10**: Sodium ascorbate (30 mg, 0.15 mmol) and CuSO<sub>4</sub>·5H<sub>2</sub>O (20 mg, 0.08 mmol) were added to a solution of **OAT-COPrg-7** (0.70 g, 0.27 mmol) and **15** (0.24 g, 0.31 mmol) in THF/H<sub>2</sub>O (*v/v* = 9/1, 20 mL). The mixture was stirred at 25 °C for 48 h. Aqueous HCl (10 mL, 0.2 M) was poured into the solution and the reaction mixture was extracted with DCM (3 × 20 mL). The combined organic layers were washed with H<sub>2</sub>O (2 × 10 mL), dried over Na<sub>2</sub>SO<sub>4</sub>, filtered, and concentrated *in vacuo*. Chromatography of the residue over silica gel (eluent: CHCl<sub>3</sub>/MeOH = 20/1) afforded **OAT-CO<sub>2</sub>H-10** as a white solid (0.84 g, 80%). *R<sub>f</sub>* = 0.21; M.p. 144–152 °C; <sup>1</sup>H NMR

(400 MHz, CDCl<sub>3</sub>, CO<sub>2</sub>H signal too broad to be observed):  $\delta$  = 8.37 (br s, NH, 1 H), 7.94–7.88 (m, NH, 4 H), 7.74 (br s, NH, 1 H), 7.59–7.54 (m, NH, 3 H), 7.45–7.39 (m, NH and TriazH, 6 H), 7.27–7.17 (m, ArH, 20 H), 5.43 (br s, TriazCH<sub>2</sub>Ar, 10 H), 4.51–4.41 (m, NHCH<sub>2</sub>Triaz and ArCH<sub>2</sub>NH, 20 H), 3.68 (s, OCH<sub>3</sub>, 3 H), 1.97–1.74 (m, CCH<sub>2</sub>, 24 H), 1.21–1.15 (m, 252 H), 0.89–0.85 (m, CH<sub>3</sub>, 72 H); <sup>13</sup>C NMR (125 MHz, CDCl<sub>3</sub>):  $\delta$  = 174.12, 174.10, 174.07, 174.04, 172.94, 172.91, 171.6, 145.3, 144.7, 139.5, 139.4, 139.3, 133.8, 133.6, 133.5, 128.5, 128.41, 128.37, 128.32, 122.2, 122.0, 121.9, 58.1, 57.4, 57.3, 57.2, 54.02, 53.97, 53.9, 52.4, 43.32, 43.27, 43.24, 37.9, 37.8, 37.6, 37.4, 37.2, 37.01, 36.99, 35.3, 35.2, 34.0, 33.78, 33.76, 33.7, 33.63, 33.55, 33.24, 33.19, 33.18, 32.1, 29.9, 28.90, 28.86, 26.70, 26.69, 26.6, 23.2, 22.8, 22.6, 22.34, 22.30, 22.2, 22.1, 14.31, 14.26 ppm; accurate mass (ESI) calcd for [C<sub>242</sub>H<sub>417</sub>N<sub>25</sub>O<sub>14</sub> + 2Na]<sup>2+</sup>: 1973.1268; found: 1973.1260.

**OAT-COPrg-11**: COMU (14 mg, 0.033 mmol) and DIPEA (0.01 mL, 0.06 mmol) were added in succession to a stirred solution of **OAT-CO<sub>2</sub>H-10** (0.10 g, 0.026 mmol) in DMF (10 mL) at 0 °C. After 10 min, propargylamine (0.02 mL, 0.30 mmol) was added to the mixture. The reaction solution was allowed to stir at 50 °C for 48 h. H<sub>2</sub>O (3 mL) was poured into the solution and the reaction mixture was extracted with DCM (3 × 10 mL). The combined organic layers were washed with saturated NaHCO<sub>3</sub> (2 × 10 mL), saturated NaHSO<sub>4</sub> (2 × 10 mL), dried over Na<sub>2</sub>SO<sub>4</sub>, filtered, and concentrated *in vacuo*. Chromatography of the residue over silica gel (eluent: CHCl<sub>3</sub>/MeOH = 20/1) afforded **OAT-COPrg-11** as a white solid (0.08 g, 78%). *R*<sub>f</sub> = 0.25; M.p. 151–155 °C; <sup>1</sup>H NMR (400 MHz, CDCl<sub>3</sub>):  $\delta$  = 8.34 (br s, NH, 1 H), 7.90 (br s, NH, 3 H), 7.84 (br s, NH, 1 H), 7.76 (br s, NH, 1 H), 7.43–7.39 (m, NH and TriazH, 10 H), 7.24–7.16 (m, ArH, 20 H), 5.42 (br s, ArCH<sub>2</sub>Triaz, 10 H), 4.50–4.41 (m, NHCH<sub>2</sub>Ar and NHCH<sub>2</sub>Triaz, 20 H), 4.03 (br s, CH≡CCH<sub>2</sub>, 2 H), 3.67 (s, OCH<sub>3</sub>, 3 H), 2.18 (br s, C≡CH, 1 H), 1.87–1.73 (m, CCH<sub>2</sub>, 24 H), 1.20–1.14 (m, 252 H), 0.88–0.85 (m, CH<sub>3</sub>, 72 H); <sup>13</sup>C NMR (100 MHz, CDCl<sub>3</sub>):  $\delta$  = 175.7, 174.0, 173.6, 173.1, 172.9, 171.6, 145.4, 144.7, 139.5, 139.3, 133.8, 133.65, 133.59, 128.5, 128.40, 128.38, 122.1, 121.8, 79.4, 71.6, 58.1, 57.25, 57.19, 53.95, 53.90, 52.4, 43.3, 38.3, 37.9, 37.8, 37.3, 37.2, 37.0, 35.3, 34.0, 33.8, 33.6, 33.2,

32.1, 29.9, 29.4, 28.9, 26.7, 23.2, 22.8, 22.3, 22.2, 14.30, 14.26 ppm; accurate mass (ESI) calcd for  $[C_{245}H_{420}N_{26}O_{13} + 2Na]^{2+}$ : 1991.6426; found: 1991.6429.

**OAT-CO<sub>2</sub>H-12**: Sodium ascorbate (8 mg, 0.04 mmol) and CuSO<sub>4</sub>·5H<sub>2</sub>O (4 mg, 0.02 mmol) were added to a solution of **OAT-COPrg-9** (0.21 g, 0.06 mmol) and compound **15** (86 mg, 0.065 mmol) in THF/H<sub>2</sub>O (*v/v* = 9/1, 5 mL). The mixture was stirred at 25 °C for 3 d. Aqueous HCl (5 mL, 0.2 M) was poured into the solution and the reaction mixture was extracted with CHCl<sub>3</sub> (3 × 10 mL). The combined organic layers were washed with H<sub>2</sub>O (2 × 10 mL), dried over Na<sub>2</sub>SO<sub>4</sub>, filtered, and concentrated *in vacuo*. Chromatography of the residue over silica gel (eluent: CHCl<sub>3</sub>/MeOH = 20/1) afforded **OAT-CO<sub>2</sub>H-12** as a white solid (0.18 g, 66%). *R<sub>f</sub>* = 0.21; M.p. 156–161 °C; <sup>1</sup>H NMR (400 MHz, CDCl<sub>3</sub>, CO<sub>2</sub>H signal too broad to be observed): δ = 8.36 (br s, NH, 1 H), 7.92 (2 br s, NH, 5 H), 7.59 (br s, NH, 2 H), 7.51 (3 br s, NH, 3 H), 7.44–7.38 (m, NH and TriazH, 7 H), 7.27–7.17 (m, ArH, 24 H), 5.42 (br s, TriazCH<sub>2</sub>Ar, 12 H), 4.51–4.41 (m, NHCH<sub>2</sub>Triaz and ArCH<sub>2</sub>NH, 24 H), 3.68 (s, OCH<sub>3</sub>, 3 H), 1.87–1.74 (m, CCH<sub>2</sub>, 28 H), 1.21–1.15 (m, 294 H), 0.87–0.85 (m, CH<sub>3</sub>, 84 H); <sup>13</sup>C NMR (400 MHz, CDCl<sub>3</sub>): δ = 175.7, 174.08, 174.06, 174.0, 172.9, 172.7, 171.6, 145.3, 144.72, 144.70, 139.44, 139.38, 139.3, 139.0, 133.8, 133.7, 133.6, 133.5, 128.5, 128.42, 128.38, 128.33, 128.30, 122.2, 122.1, 121.9, 121.8, 58.1, 57.4, 57.3, 57.2, 54.02, 53.95, 53.9, 52.4, 43.33, 43.27, 43.2, 38.5, 37.9, 37.8, 37.71, 37.6, 37.3, 37.2, 36.99, 36.96, 35.3, 35.23, 35.18, 35.0, 34.0, 33.74, 33.72, 33.66, 33.6, 33.5, 33.22, 33.17, 33.15, 32.1, 30.0, 29.8, 28.89, 28.85, 26.69, 26.68, 26.66, 26.6, 23.3, 22.9, 22.6, 22.34, 22.30, 22.2, 22.1, 14.4, 14.3 ppm; accurate mass (ESI) calcd for  $[C_{284}H_{488}N_{30}O_{16} + 2Na]^{2+}$ : 2312.4087; found: 2312.4092.

**OAT-COProp-7**: *N*-(3-Dimethylaminopropyl)-*N'*-ethylcarbodiimide hydrochloride (9.4 mg, 0.05 mmol) and HOBt (5.10 mg, 0.038 mmol) were added in succession to a stirred solution of **OAT-CO<sub>2</sub>H-6** (95 mg, 0.038 mmol) in DCM (10 mL) at 0 °C. After 10 min, propylamine (0.062 mL, 0.75 mmol) was added to the mixture. The reaction solution was allowed to stir at 40 °C for 12 h. H<sub>2</sub>O (5 mL) was poured into the solution and the reaction mixture was extracted with DCM (3 × 10 mL). The combined organic

layers were washed with saturated NaHCO<sub>3</sub> (2 × 10 mL), saturated NaHSO<sub>4</sub> (2 × 10 mL), dried over Na<sub>2</sub>SO<sub>4</sub>, filtered, and concentrated *in vacuo*. Chromatography of the residue over silica gel (eluent: CHCl<sub>3</sub>/EtOAc = 4/1) afforded **OAT-COProp-7** as a white solid (83 mg, 85%). *R*<sub>f</sub> = 0.34; M.p. 124–128 °C; <sup>1</sup>H NMR (400 MHz, CDCl<sub>3</sub>): δ = 8.34 (br s, NH, 1 H), 8.12 (br s, NH, 1 H), 7.91 (br s, NH, 1 H), 7.84 (br s, NH, 1 H), 7.43 (br s, NH and TriazH, 2 H), 7.39–7.38 (m, NH and TriazH, 3 H), 7.24–7.16 (2 m, ArH, 12 H), 6.66 (br s, NH, 1 H), 5.43 (m, TriazCH<sub>2</sub>Ar, 6 H), 4.51–4.41 (m, NHCH<sub>2</sub>Triaz and ArCH<sub>2</sub>NH, 12 H), 3.68 (s, OCH<sub>3</sub>, 3 H), 3.21 (q, NHCH<sub>2</sub>CH<sub>2</sub>CH<sub>3</sub>, *J* ~ 6.5 Hz, 2 H), 1.92–1.60 (m, 16 H), 1.54–1.49 (m, NHCH<sub>2</sub>CH<sub>2</sub>CH<sub>3</sub>, 2 H), 1.25–1.15 (m, 168 H), 0.89–0.85 (m, CH<sub>2</sub>CH<sub>3</sub>, 51 H); <sup>13</sup>C NMR (100 MHz, CDCl<sub>3</sub>): δ = 176.1, 175.7, 174.0, 173.8, 173.2, 172.9, 171.5, 145.4, 144.7, 144.6, 139.52, 139.47, 139.3, 133.8, 133.6, 133.5, 128.4, 122.1, 121.75, 121.68, 58.1, 57.2, 57.1, 53.94, 53.88, 52.3, 43.2, 41.4, 38.3, 37.9, 37.3, 37.2, 37.0, 35.3, 34.0, 33.8, 33.6, 33.5, 33.3, 33.23, 33.19, 32.1, 29.9, 29.0, 28.9, 26.74, 26.68, 26.6, 23.2, 22.8, 22.3, 22.2, 14.3, 14.2, 11.5 ppm; accurate mass (MALDI) calcd for [C<sub>161</sub>H<sub>282</sub>N<sub>16</sub>O<sub>9</sub> + Na]<sup>+</sup>: 2586.2206; found: 2586.2221.

**OAT-H-6**: The compound was recovered from a xerogel sample of **OAT-CO<sub>2</sub>H-6** after it was subjected to annealing at 200 °C for 5 min in the DSC instrument. <sup>1</sup>H NMR (400 MHz, CDCl<sub>3</sub>): δ = 8.35 (t, NH, *J* = 5.3 Hz, 1 H), 7.80 and 7.79 (2 br s, NH, 2 H), 7.43–7.39 (m, NH and TriazH, 5 H), 7.28–7.17 (m, ArH, 12 H), 5.74 (t, NH, *J* = 6.0 Hz, 1 H), 5.44–5.43 (m, TriazCH<sub>2</sub>Ar, 6 H), 4.51–4.42 (m, NHCH<sub>2</sub>Triaz and ArCH<sub>2</sub>NH, 12 H), 3.68 (s, OCH<sub>3</sub>, 3 H), 2.04 (br s, CH, 1 H), 1.92–1.63 (m, CCH<sub>2</sub>, 16 H), 1.20–1.14 (m, 168 H), 0.88–0.86 (m, CH<sub>3</sub>, 48 H); <sup>13</sup>C NMR (100 MHz, CDCl<sub>3</sub>): δ = 176.2, 175.8, 174.0, 173.0, 171.6, 145.5, 144.7, 139.7, 139.5, 133.9, 128.6, 128.5, 128.43, 128.40, 122.2, 121.8, 58.2, 57.3, 54.0, 52.4, 48.3, 43.1, 37.9, 37.5, 37.2, 37.1, 35.4, 34.1, 33.9, 33.8, 33.7, 33.42, 33.39, 33.2, 32.1, 30.0, 29.0, 28.9, 26.8, 26.7, 25.1, 23.3, 22.9, 22.4, 22.2, 14.33, 14.28 ppm; accurate mass (MALDI) calcd for [C<sub>157</sub>H<sub>275</sub>N<sub>15</sub>O<sub>8</sub> + Na]<sup>+</sup>: 2523.1497; found: 2523.1495.

**OAT-H-8:** The compound was recovered from a xerogel sample of **OAT-CO<sub>2</sub>H-8** after it was subjected to annealing at 200 °C for 5 min in the DSC instrument. <sup>1</sup>H NMR (400 MHz, CDCl<sub>3</sub>): δ = 8.35 (t, NH, *J* = 5.3 Hz, 1 H), 7.86 (t, NH, *J* = 5.3 Hz, 1 H), 7.82 (t, NH, *J* = 5.8 Hz, 2 H), 7.44–7.39 (m, NH and TriazH, 7 H), 7.28–7.17 (m, ArH, 16 H), 5.74 (t, NH, *J* = 5.7 Hz, 1 H), 5.44–5.43 (m, TriazCH<sub>2</sub>Ar, 8 H), 4.51–4.42 (m, NHCH<sub>2</sub>Triaz and ArCH<sub>2</sub>NH, 16 H), 3.68 (s, OCH<sub>3</sub>, 3 H), 2.04 (br s, CH, 1 H), 2.02–1.74 (m, CCH<sub>2</sub>, 20 H), 1.20–1.14 (m, 210 H), 0.88–0.86 (m, CH<sub>3</sub>, 60 H); accurate mass (MALDI) calcd for [C<sub>199</sub>H<sub>346</sub>N<sub>20</sub>O<sub>10</sub> + Na]<sup>+</sup>: 3201.7137; found: 3201.7151.

**OAT-H-10:** The compound was recovered from a xerogel sample of **OAT-CO<sub>2</sub>H-10** after it was subjected to annealing at 200 °C for 5 min in the DSC instrument. <sup>1</sup>H NMR (400 MHz, CDCl<sub>3</sub>): δ = 8.35 (t, NH, *J* = 5.5 Hz, 1 H), 7.89–7.81 (m, NH, 4 H), 7.46–7.39 (m, NH and TriazH, 9 H), 7.46–7.16 (m, ArH, 20 H), 5.74 (t, NH, *J* = 5.7 Hz, 1 H), 5.44–5.43 (m, TriazCH<sub>2</sub>Ar, 10 H), 4.51–4.41 (m, NHCH<sub>2</sub>Triaz and ArCH<sub>2</sub>NH, 20 H), 3.68 (s, OCH<sub>3</sub>, 3 H), 2.04–2.03 (br s, CH, 1 H), 1.92–1.73 (m, CCH<sub>2</sub>, 24 H), 1.24–1.14 (m, 252 H), 0.88–0.84 (m, CH<sub>3</sub>, 72 H); accurate mass (MALDI) calcd for [C<sub>241</sub>H<sub>417</sub>N<sub>25</sub>O<sub>12</sub> + Na]<sup>+</sup>: 3879.2745; found: 3879.2670.

**OAT-H-12:** The compound was recovered from a xerogel sample of **OAT-CO<sub>2</sub>H-10** after it was subjected to annealing at 200 °C for 5 min in the DSC instrument. <sup>1</sup>H NMR (400 MHz, CDCl<sub>3</sub>): δ = 8.35 (br s, NH, 1 H), 7.90–7.82 (m, NH, 5 H), 7.44–7.39 (m, NH and TriazH, 11 H), 7.28–7.16 (m, ArH, 24 H), 5.74 (t, NH, *J* = 6.0 Hz, 1 H), 5.44–5.43 (m, TriazCH<sub>2</sub>Ar, 12 H), 4.51–4.41 (m, NHCH<sub>2</sub>Triaz and ArCH<sub>2</sub>NH, 24 H), 3.68 (s, OCH<sub>3</sub>, 3 H), 2.04 (br s, CH, 1 H), 1.87–1.73 (m, CCH<sub>2</sub>, 28 H), 1.24–1.14 (m, 294 H), 0.88–0.84 (m, CH<sub>3</sub>, 84 H).

(c) Synthesis of **OATe-CO<sub>2</sub>H-2n** and **OATe-COPrg-(2n+1)**

**OATe-CO<sub>2</sub>H-2:** Sodium ascorbate (0.42 g, 2.00 mmol) and CuSO<sub>4</sub>·5H<sub>2</sub>O (0.2 g, 0.84 mmol) were added to a solution of compounds **16** (2.76 g, 5.00 mmol) and **13** (2.80 g, 4.20 mmol) in THF/H<sub>2</sub>O (v/v = 9/1, 30 mL). The mixture was stirred at 25 °C for 12 h.



Aqueous HCl (20 mL, 0.2 M) was poured into the solution and the reaction mixture was extracted with DCM (3 × 20 mL). The combined organic layers were washed with H<sub>2</sub>O (2 × 20 mL), dried over Na<sub>2</sub>SO<sub>4</sub>, filtered, and concentrated *in vacuo*. Chromatography of the residue over silica gel (eluent: hexane/EtOAc/HOAc = 200/40/1) afforded **OATe-CO<sub>2</sub>H-2** as a colorless oil (4.19 g, 82%). *R*<sub>f</sub> = 0.21; <sup>1</sup>H NMR (400 MHz, CDCl<sub>3</sub>, CO<sub>2</sub>H signal too broad to be observed): δ = 8.76 (br s, NH, 1 H), 8.00 (br s, NH, 1 H), 7.15 (s, TriazH, 1 H), 7.09 (d, *J* = 7.9 Hz, ArH, 2 H), 6.89 (d, ArH, *J* = 7.9 Hz, 2 H), 4.55 (t, TriazCH<sub>2</sub>CH<sub>2</sub>, *J* = 6.0 Hz, 2 H), 4.46 (d, NHCH<sub>2</sub>Triaz, *J* = 5.6 Hz, 2 H), 3.68 (s, OCH<sub>3</sub>, 3 H), 3.65–3.60 (m, CH<sub>2</sub>CH<sub>2</sub>NH, 2 H), 3.09 (t, ArCH<sub>2</sub>, *J* = 6.0 Hz, 2 H), 2.78 (t, ArCH<sub>2</sub>, *J* = 6.0 Hz, 2 H), 1.84–1.68 (m, 8 H), 1.21–1.17 (m, 84 H), 0.87–0.83 (m, CH<sub>2</sub>CH<sub>3</sub>, 24 H); <sup>13</sup>C NMR (100 MHz, CDCl<sub>3</sub>): δ = 177.2, 175.4, 173.0, 172.5, 143.7, 137.9, 135.4, 129.3, 129.1, 123.6, 58.0, 57.2, 52.4, 52.0, 40.1, 39.0, 37.5, 37.33, 37.29, 37.0, 36.9, 36.7, 35.3, 35.0, 34.0, 33.9, 33.70, 33.67, 33.6, 33.5, 33.3, 33.2, 33.1, 33.0, 32.0, 29.94, 29.89, 29.88, 28.88, 28.85, 28.8, 26.71, 26.67, 26.65, 26.56, 23.25, 23.2, 22.9, 22.8, 22.31, 22.26, 14.3, 14.2 ppm; accurate mass (ESI) calcd for [C<sub>76</sub>H<sub>137</sub>N<sub>5</sub>O<sub>6</sub> + Na]<sup>+</sup>: 1239.0461; found: 1239.0446.

**OATe-COPrg-3**: COMU (0.45 g, 1.05 mmol) and DIPEA (0.31 mL, 1.74 mmol) were added in succession to a stirred solution of **OATe-CO<sub>2</sub>H-2** (1.06 g, 0.87 mmol) in DCM (15 mL) at 0 °C. After 10 min, propargylamine (0.17 mL, 2.61 mmol) was added to the mixture. The reaction solution was allowed to stir at 25 °C for 12 h. H<sub>2</sub>O (10 mL) was poured into the solution and the reaction mixture was extracted with DCM (3 × 20 mL). The combined organic layers were washed with saturated NaHCO<sub>3</sub> (2 × 10 mL), saturated NaHSO<sub>4</sub> (2 × 10 mL), dried over Na<sub>2</sub>SO<sub>4</sub>, filtered, and concentrated *in vacuo*. Chromatography of the residue over silica gel (eluent: hexane/EtOAc = 3/1) afforded **OATe-COPrg-3** as a pale yellow oil (0.77 g, 73%). *R*<sub>f</sub> = 0.33; <sup>1</sup>H NMR (500 MHz, CDCl<sub>3</sub>): δ = 8.35 (t, NH, *J* = 5.5 Hz, 1 H), 7.75 (t, NH, *J* = 5.3 Hz, 1 H), 7.33 (s, TriazH, 1 H), 7.19 (t, NH, *J* = 5.8 Hz, 1 H), 7.09 (d, ArH, *J* = 6.4 Hz, 2 H), 7.01 (d, ArH, *J* = 6.4 Hz, 2 H), 4.48–4.45 (m, TriazCH<sub>2</sub>CH<sub>2</sub> and NHCH<sub>2</sub>Triaz, 4 H), 3.99 (dd, CH≡CCH<sub>2</sub>, *J* = 5.5 and 2.5 Hz, 2 H), 3.67 (s, OCH<sub>3</sub>, 3 H), 3.47 (q, CH<sub>2</sub>CH<sub>2</sub>NH, *J* ~ 6.5 Hz, 2 H),

3.11 (t, ArCH<sub>2</sub>, *J* = 7.5 Hz, 2 H), 2.76 (t, ArCH<sub>2</sub>, *J* = 7.3 Hz, 2 H), 2.14 (t, C≡CH, *J* = 2.5 Hz, 1 H), 1.93–1.87 (m, CCH<sub>2</sub>, 2 H), 1.79–1.67 (m, CCH<sub>2</sub>, 6 H), 1.19–1.13 (m, 84 H), 0.84–0.83 (m, CH<sub>2</sub>CH<sub>3</sub>, 24 H); <sup>13</sup>C NMR (125 MHz, CDCl<sub>3</sub>): δ = 175.6, 173.33, 173.25, 171.5, 144.7, 137.8, 135.1, 129.2, 128.9, 122.4, 79.6, 71.2, 58.0, 56.9, 52.3, 51.6, 41.0, 38.2, 37.3, 37.2, 37.0, 36.9, 36.5, 35.4, 35.2, 34.0, 33.71, 33.70, 33.55, 33.46, 33.2, 33.15, 33.08, 31.96, 29.84, 29.81, 29.2, 28.84, 28.81, 28.76, 26.62, 26.61, 26.57, 26.5, 23.1, 22.7, 22.29, 22.26, 22.1, 14.2, 14.1 ppm; accurate mass (ESI) calcd for [C<sub>79</sub>H<sub>140</sub>N<sub>6</sub>O<sub>5</sub> + Na]<sup>+</sup>: 1276.0777; found: 1276.0753.

**OATe-CO<sub>2</sub>H-4**: Sodium ascorbate (0.06 g, 0.30 mmol) and CuSO<sub>4</sub>·5H<sub>2</sub>O (0.03 g, 0.12 mmol) were added to a solution of **OATe-COPrg-3** (0.72 g, 0.58 mmol) and compound **16** (0.39 g, 0.57 mmol) in THF/H<sub>2</sub>O (*v/v* = 9/1, 20 mL). The mixture was stirred at 25 °C for 12 h. Aqueous HCl (10 mL, 0.2 M) was poured into the solution and the reaction mixture was extracted with DCM (3 × 20 mL). The combined organic layers were washed with H<sub>2</sub>O (2 × 15 mL), dried over Na<sub>2</sub>SO<sub>4</sub>, filtered, and concentrated *in vacuo*. Chromatography of the residue over silica gel (eluent: hexane/EtOAc/HOAc = 300/200/1) afforded **OATe-CO<sub>2</sub>H-4** as a colorless liquid (1.30 g, 85%). *R*<sub>f</sub> = 0.24; <sup>1</sup>H NMR (400 MHz, CDCl<sub>3</sub>, CO<sub>2</sub>H signal too broad to be observed): δ = 8.58 (br s, NH, 1 H), 8.40 (br s, NH, 1 H), 7.60 (br s, NH, 1 H), 7.39 (s, TriazH, 1 H), 7.18 (s, TriazH, 1 H), 7.12–7.04 (m, ArH, 6 H), 6.89 (d, ArH, *J* = 7.8 Hz, 2 H), 6.70 (br s, NH, 1 H), 4.57–4.46 (m, TriazCH<sub>2</sub>CH<sub>2</sub> and NHCH<sub>2</sub>Triaz, 8 H), 3.70 (s, OCH<sub>3</sub>, 3 H), 3.63 (q, CH<sub>2</sub>CH<sub>2</sub>NH, *J* ~ 6.0 Hz, 2 H), 3.47 (q, CH<sub>2</sub>CH<sub>2</sub>NH, *J* ~ 6.8 Hz, 2 H), 3.17–3.10 (m, ArCH<sub>2</sub>, 4 H), 2.80–2.73 (m, ArCH<sub>2</sub>, 4 H), 1.98–1.56 (m, 12 H), 1.22–1.18 (m, 126 H), 0.88–0.85 (m, CH<sub>2</sub>CH<sub>3</sub>, 36 H); <sup>13</sup>C NMR (125 MHz, CDCl<sub>3</sub>): δ = 176.9, 175.7, 173.9, 173.4, 173.2, 171.6, 144.9, 143.9, 137.9, 137.7, 135.4, 135.2, 129.3, 129.2, 129.1, 129.0, 123.0, 122.4, 58.1, 57.3, 57.0, 52.4, 52.0, 51.7, 41.1, 40.3, 38.9, 38.0, 37.4, 37.34, 37.30, 37.25, 37.2, 37.10, 37.07, 37.05, 36.69, 36.6, 35.5, 35.3, 35.0, 34.1, 34.0, 33.81, 33.80, 33.73, 33.69, 33.65, 33.62, 33.56, 33.3, 33.25, 33.17, 32.07, 32.06, 30.0, 29.9, 28.92, 28.86, 26.74, 26.70, 26.68, 26.66, 26.6, 23.3, 23.2, 22.8, 22.7, 22.41, 22.38, 22.2, 22.1, 14.30, 14.29, 14.2 ppm; accurate mass (ESI) calcd for [C<sub>120</sub>H<sub>212</sub>N<sub>10</sub>O<sub>8</sub> + Na]<sup>+</sup>:

1945.6414; found: 1945.6435.

**OATe-COPrg-5:** COMU (0.35 g, 0.82 mmol) and DIPEA (0.24 mL, 1.36 mmol) were added in succession to a stirred solution of **OATe-CO<sub>2</sub>H-4** (1.30 g, 0.68 mmol) in DCM (30 mL) at 0 °C. After 10 min, propargylamine (0.22 mL, 3.40 mmol) was added to the mixture. The reaction solution was allowed to stir at 25 °C for 24 h. H<sub>2</sub>O (10 mL) was poured into the solution and the reaction mixture was extracted with DCM (3 × 20 mL). The combined organic layers were washed with saturated NaHCO<sub>3</sub> (2 × 10 mL), saturated NaHSO<sub>4</sub> (2 × 10 mL), dried over Na<sub>2</sub>SO<sub>4</sub>, filtered, and concentrated *in vacuo*. Chromatography of the residue over silica gel (eluent: hexane/EtOAc = 2/1) afforded **OATe-COPrg-5** as a colorless liquid (0.88 g, 66%). *R*<sub>f</sub> = 0.25; <sup>1</sup>H NMR (400 MHz, CDCl<sub>3</sub>): δ = 8.38 (br s, NH, 1 H), 7.75 (br s, NH, 1 H), 7.56 (br s, NH, 1 H), 7.39 (s, TriazH, 1 H), 7.35 (s, TriazH, 1 H), 7.19 (br s, NH, 1 H), 7.13–7.04 (m, NH and ArH, 9 H), 4.52–4.48 (m, TriazCH<sub>2</sub>CH<sub>2</sub> and NHCH<sub>2</sub>Triaz, 8 H), 4.03 (dd, CH≡CCH<sub>2</sub>, *J* = 5.0 and 2.4 Hz, 2 H), 3.70 (s, OCH<sub>3</sub>, 3 H), 3.50–3.47 (m, CH<sub>2</sub>CH<sub>2</sub>NH, 4 H), 3.17–3.12 (m, ArCH<sub>2</sub>, 4 H), 2.80–2.75 (m, ArCH<sub>2</sub>, 4 H), 2.19 (t, C≡CH, *J* = 2.3 Hz, 1 H), 1.96–1.73 (m, CCH<sub>2</sub>, 12 H), 1.21–1.15 (m, 126 H), 0.87–0.83 (m, CH<sub>2</sub>CH<sub>3</sub>, 36 H); <sup>13</sup>C NMR (125 MHz, CDCl<sub>3</sub>): δ = 175.7, 173.7, 173.3, 173.2, 173.1, 171.6, 144.9, 144.5, 137.91, 137.87, 135.2, 129.3, 129.00, 128.98, 122.4, 122.0, 79.6, 71.5, 58.1, 57.14, 57.09, 52.4, 51.69, 51.67, 41.1, 38.3, 37.9, 37.5, 37.3, 37.09, 37.07, 36.59, 36.56, 35.6, 35.4, 34.10, 34.06, 33.83, 33.82, 33.7, 33.6, 33.30, 33.27, 33.2, 32.1, 30.0, 29.9, 29.3, 29.0, 28.94, 28.91, 28.88, 26.74, 26.69, 26.6, 23.3, 22.8, 22.44, 22.40, 22.2, 22.1, 14.30, 14.25 ppm; accurate mass (ESI) calcd for [C<sub>123</sub>H<sub>215</sub>N<sub>11</sub>O<sub>7</sub> + Na]<sup>+</sup>: 1982.6730; found: 1982.6731.

**OATe-CO<sub>2</sub>H-6:** Sodium ascorbate (0.05 g, 0.25 mmol) and CuSO<sub>4</sub>·5H<sub>2</sub>O (0.03 g, 0.12 mmol) were added to a solution of **OATe-COPrg-5** (0.88 g, 0.45 mmol) and **16** (0.30 g, 0.45 mmol) in THF/H<sub>2</sub>O (*v/v* = 9/1, 30 mL). The mixture was stirred at 25 °C for 24 h. Aqueous HCl (20 mL, 0.2 M) was poured into the solution and the reaction mixture was extracted with DCM (3 × 30 mL). The combined organic layers were washed with H<sub>2</sub>O (2 × 20 mL), dried over Na<sub>2</sub>SO<sub>4</sub>, filtered, and concentrated *in vacuo*.

Chromatography of the residue over silica gel (eluent: CHCl<sub>3</sub>/MeOH = 20/1) afforded **OATe-CO<sub>2</sub>H-6** as a white solid (0.91 g, 77%). *R<sub>f</sub>* = 0.35; M.p. 72–77 °C; <sup>1</sup>H NMR (400 MHz, CDCl<sub>3</sub>, CO<sub>2</sub>H signal too broad to be observed): δ = 8.47 (br s, NH, 1 H), 8.39 (br s, NH, 1 H), 7.84 (br s, NH, 1 H), 7.67 (br s, NH, 1 H), 7.39 (s, TriazH, 1 H), 7.38 (s, TriazH, 1 H), 7.21 (br s, NH, 1 H), 7.19 (s, TriazH, 1 H), 7.12–7.04 (m, ArH, 10 H), 6.90 (d, ArH, *J* = 7.8 Hz, 2 H), 6.80 (br s, NH, 1 H), 4.56–4.44 (m, TriazCH<sub>2</sub>CH<sub>2</sub> and NHCH<sub>2</sub>Triaz, 12 H), 3.70 (s, OCH<sub>3</sub>, 3 H), 3.61–3.60 (m, CH<sub>2</sub>CH<sub>2</sub>NH, 2 H), 3.48–3.45 (m, CH<sub>2</sub>CH<sub>2</sub>NH, 4 H), 3.16–3.08 (m, ArCH<sub>2</sub>, 6 H), 2.78–2.72 (m, ArCH<sub>2</sub>, 6 H), 1.96–1.61 (m, 16 H), 1.21–1.14 (m, 168 H), 0.86–0.84 (m, CH<sub>2</sub>CH<sub>3</sub>, 48 H); <sup>13</sup>C NMR (100 MHz, CDCl<sub>3</sub>): δ = 175.7, 173.9, 173.7, 173.3, 173.2, 171.6, 137.9, 137.8, 135.4, 135.1, 129.33, 129.26, 129.1, 129.0, 58.1, 57.14, 57.06, 51.7, 41.1, 38.8, 37.9, 37.4, 37.34, 37.26, 37.1, 36.7, 36.6, 35.6, 35.3, 34.1, 33.8, 33.7, 33.6, 33.3, 33.2, 32.1, 29.9, 28.93, 28.88, 26.74, 26.68, 26.6, 23.2, 22.8, 22.4, 22.2, 14.3, 14.2 ppm; accurate mass (ESI) calcd for [C<sub>164</sub>H<sub>287</sub>N<sub>15</sub>O<sub>10</sub> + 2Na]<sup>2+</sup>: 1326.1204; found: 1236.1201.

**OATe-COPrg-7**: COMU (0.18 g, 0.42 mmol) and DIPEA (0.12 mL, 0.84 mmol) were added in succession to a stirred solution of **OATe-CO<sub>2</sub>H-6** (0.88 g, 0.34 mmol) in DCM (30 mL) at 0 °C. After 10 min, propargylamine (0.20 mL, 3.28 mmol) was added to the mixture. The reaction solution was allowed to stir at 25 °C for 24 h. H<sub>2</sub>O (5 mL) was poured into the solution and the reaction mixture was extracted with DCM (3 × 30 mL). The combined organic layers were washed with saturated NaHCO<sub>3</sub> (2 × 20 mL), saturated NaHSO<sub>4</sub> (2 × 20 mL), dried over Na<sub>2</sub>SO<sub>4</sub>, filtered, and concentrated *in vacuo*. Chromatography of the residue over silica gel (eluent: CHCl<sub>3</sub>/MeOH = 25/1) afforded **OATe-COPrg-7** as a white solid (0.83 g, 92%). *R<sub>f</sub>* = 0.34; M.p. 95–100 °C; <sup>1</sup>H NMR (400 MHz, CDCl<sub>3</sub>): δ = 8.38 (br s, NH, 1 H), 7.78 (br s, NH, 1 H), 7.70 (br s, NH, 1 H), 7.53 (br s, NH, 1 H), 7.39 (s, TriazH, 1 H), 7.38 (s, TriazH, 1 H), 7.36 (s, TriazH, 1 H), 7.20 (br s, NH, 2 H), 7.14–7.05 (2 m, NH and ArH, 13 H), 4.52–4.48 (m, TriazCH<sub>2</sub>CH<sub>2</sub> and NHCH<sub>2</sub>Triaz, 12 H), 4.03 (br s, CH≡CCH<sub>2</sub>, 2 H), 3.70 (s, OCH<sub>3</sub>, 3 H), 3.51–3.47 (m, CH<sub>2</sub>CH<sub>2</sub>NH, 6 H), 3.20–3.10 (m, ArCH<sub>2</sub>, 6 H), 2.79–2.76 (m, ArCH<sub>2</sub>, 6 H), 2.19 (br s, C≡CH, 1 H), 1.96–1.74 (m, CCH<sub>2</sub>, 16 H), 1.25–1.15 (m, 168 H), 0.88–0.83 (m,

CH<sub>2</sub>CH<sub>3</sub>, 48 H); <sup>13</sup>C NMR (176 MHz, CDCl<sub>3</sub>): δ = 175.8, 173.7, 173.31, 173.26, 171.6, 144.9, 137.9, 135.13, 135.09, 129.3, 129.0, 122.5, 122.1, 79.5, 71.5, 58.1, 57.11, 57.06, 52.4, 51.7, 41.1, 38.3, 38.0, 37.5, 37.3, 37.1, 37.0, 36.6, 35.6, 35.3, 34.1, 34.0, 33.8, 33.6, 33.5, 33.3, 33.24, 33.21, 33.16, 32.1, 30.3, 30.0, 29.95, 29.86, 29.5, 29.3, 28.93, 28.89, 28.87, 26.73, 26.68, 26.6, 23.3, 22.8, 22.43, 22.40, 22.2, 22.13, 14.35, 14.3 ppm; accurate mass (MALDI) calcd for [C<sub>167</sub>H<sub>290</sub>N<sub>16</sub>O<sub>9</sub> + Na]<sup>+</sup>: 2688.2651; found: 2688.2665.

**OATe-CO<sub>2</sub>H-8**: Sodium ascorbate (12 mg, 0.061 mmol) and CuSO<sub>4</sub>·5H<sub>2</sub>O (4.00 mg, 0.016 mmol) were added to a solution of **OATe-COPrg-5** (0.14 g, 0.072 mmol) and **17** (0.10 g, 0.073 mmol) in THF/H<sub>2</sub>O (v/v = 9/1, 10 mL). The solution was stirred at 50 °C for 12 h. After cooling down to room temperature, aqueous HCl (5 mL, 0.2 M) was poured into the solution and the reaction mixture was extracted with DCM (3 × 10 mL). The combined organic layers were washed with H<sub>2</sub>O (2 × 10 mL), dried over Na<sub>2</sub>SO<sub>4</sub>, filtered, and concentrated *in vacuo*. Chromatography of the residue over silica gel (eluent: CHCl<sub>3</sub>/MeOH = 20/1) afforded **OATe-CO<sub>2</sub>H-8** as a white solid (0.21 g, 88%). *R*<sub>f</sub> = 0.34; M.p. 105–111 °C; <sup>1</sup>H NMR (400 MHz, CDCl<sub>3</sub>, CO<sub>2</sub>H signal too broad to be observed): δ = 8.49 (br s, NH, 1 H), 8.39 (br s, NH, 1 H), 7.85–7.75 (m, NH, 2 H), 7.59 (br s, NH, 1 H), 7.39 (s, TriazH, 1 H), 7.38 (s, TriazH, 2 H), 7.19 (br s, NH and TriazH, 2 H), 7.14–7.05 (m, NH and ArH, 15 H), 6.89 (d, ArH, *J* = 7.8 Hz, 2 H), 6.75 (br s, NH, 1 H), 4.55–4.45 (m, TriazCH<sub>2</sub>CH<sub>2</sub> and NHCH<sub>2</sub>Triaz, 16 H), 3.70 (s, OCH<sub>3</sub>, 3 H), 3.63–3.61 (m, CH<sub>2</sub>CH<sub>2</sub>NH, 2 H), 3.49–3.45 (m, CH<sub>2</sub>CH<sub>2</sub>NH, 6 H), 3.17–3.10 (m, ArCH<sub>2</sub>, 8 H), 2.79–2.77 (m, ArCH<sub>2</sub>, 8 H), 1.96–1.65 (m, 20 H), 1.25–1.15 (m, 210 H), 0.86–0.83 (m, CH<sub>2</sub>CH<sub>3</sub>, 60 H); <sup>13</sup>C NMR (125 MHz, CDCl<sub>3</sub>): δ = 177.0, 175.6, 173.9, 173.8, 173.2, 173.11, 173.07, 171.5, 144.8, 144.5, 144.0, 137.89, 137.87, 137.8, 135.2, 135.1, 135.0, 129.3, 129.2, 129.0, 128.9, 122.8, 122.4, 122.0, 58.1, 57.3, 57.1, 57.0, 52.3, 51.9, 51.6, 41.0, 40.4, 38.6, 37.8, 37.7, 37.3, 37.2, 37.00, 36.99, 36.6, 36.50, 36.47, 35.53, 35.50, 35.3, 35.22, 35.17, 35.0, 34.03, 33.96, 33.76, 33.75, 33.7, 33.64, 33.58, 33.5, 33.24, 33.19, 33.17, 33.1, 32.0, 29.9, 29.8, 28.9, 28.83, 28.81, 26.7, 26.63, 26.61, 26.6, 25.7, 23.2, 22.8, 22.7, 22.32, 22.29, 22.1, 14.23, 14.17 ppm; accurate mass (ESI) calcd for

[C<sub>208</sub>H<sub>362</sub>N<sub>20</sub>O<sub>12</sub> + 2Na]<sup>2+</sup>: 1690.4090; found: 1690.4091.

**OATe-COPrg-9**: COMU (0.04 g, 0.23 mmol) and DIPEA (0.03 mL, 0.38 mmol) were added in succession to a stirred solution of **OATe-CO<sub>2</sub>H-8** (0.20 g, 0.06 mmol) in DCM (10 mL) at 0 °C. After 10 min, propargylamine (0.08 mL, 1.21 mmol) was added to the mixture. The reaction solution was allowed to stir at 25 °C for 48 h. H<sub>2</sub>O (3 mL) was poured into the solution and the reaction mixture was extracted with DCM (3 × 10 mL). The combined organic layers were washed with saturated NaHCO<sub>3</sub> (2 × 10 mL), saturated NaHSO<sub>4</sub> (2 × 10 mL), dried over Na<sub>2</sub>SO<sub>4</sub>, filtered, and concentrated *in vacuo*. Chromatography of the residue over silica gel (eluent: CHCl<sub>3</sub>/MeOH = 25/1) afforded **OATe-COPrg-9** as a white solid (0.15 g, 74%). *R*<sub>f</sub> = 0.28; M.p. 119–126 °C; <sup>1</sup>H NMR (400 MHz, CDCl<sub>3</sub>): δ = 8.38 (br s, NH, 1 H), 7.80 (br s, NH, 1 H), 7.76 (br s, NH, 1 H), 7.72 (br s, NH, 1 H), 7.55 (br s, NH, 1 H), 7.39 (s, TriazH, 1 H), 7.37 (s, TriazH, 2 H), 7.35 (s, TriazH, 1 H), 7.23–7.22 (m, NH, 3 H), 7.13–7.04 (m, NH and ArH, 17 H), 4.52–4.48 (m, TriazCH<sub>2</sub>CH<sub>2</sub> and NHCH<sub>2</sub>Triaz, 16 H), 4.02 (dd, CH≡CCH<sub>2</sub>, *J* = 5.0 and 2.4 Hz, 2 H), 3.70 (s, OCH<sub>3</sub>, 3 H), 3.50–3.47 (m, CH<sub>2</sub>CH<sub>2</sub>NH, 8 H), 3.16–3.13 (m, ArCH<sub>2</sub>, 8 H), 2.78–2.75 (m, ArCH<sub>2</sub>, 8 H), 2.18 (t, C≡CH, *J* = 2.5 Hz, 1 H), 1.96–1.73 (m, CCH<sub>2</sub>, 20 H), 1.21–1.14 (m, 210 H), 0.87–0.82 (m, CH<sub>2</sub>CH<sub>3</sub>, 60 H); <sup>13</sup>C NMR (125 MHz, CDCl<sub>3</sub>): δ = 175.7, 173.74, 173.72, 173.3, 173.2, 173.16, 173.10, 173.07, 171.6, 144.9, 144.54, 144.51, 144.46, 137.94, 137.90, 137.88, 135.14, 135.09, 129.4, 129.3, 129.0, 122.4, 122.0, 79.6, 71.4, 58.1, 57.13, 57.08, 52.4, 51.7, 41.1, 38.2, 37.95, 37.88, 37.8, 37.5, 37.4, 37.3, 37.07, 37.05, 36.6, 35.60, 35.58, 35.3, 34.1, 34.0, 33.81, 33.80, 33.7, 33.6, 33.28, 33.26, 33.23, 33.18, 32.1, 29.95, 29.92, 29.8, 29.3, 28.93, 28.90, 28.87, 26.72, 26.68, 26.6, 23.3, 22.8, 22.42, 22.39, 22.2, 22.1, 14.31, 14.25 ppm; accurate mass (MALDI) calcd for [C<sub>211</sub>H<sub>365</sub>N<sub>21</sub>O<sub>11</sub> + Na]<sup>+</sup>: 3394.8604; found: 3394.8627.

**OATe-CO<sub>2</sub>H-10**: Sodium ascorbate (0.02 g, 0.10 mmol) and CuSO<sub>4</sub>·5H<sub>2</sub>O (0.01 g, 0.04 mmol) were added to a solution of **OATe-COPrg-7** (0.30 g, 0.12 mmol) and **17** (0.17 g, 0.12 mmol) in THF/H<sub>2</sub>O (*v/v* = 9/1, 15 mL). The solution was stirred at 50 °C for 48 h. Aqueous HCl (10 mL, 0.2 M) was poured into the solution and the reaction

mixture was extracted with DCM ( $3 \times 15$  mL). The combined organic layers were washed with H<sub>2</sub>O ( $2 \times 10$  mL), dried over Na<sub>2</sub>SO<sub>4</sub>, filtered, and concentrated *in vacuo*. Chromatography of the residue over silica gel (eluent: CHCl<sub>3</sub>/MeOH = 20/1) afforded **OATe-CO<sub>2</sub>H-10** as a white solid (0.42 g, 87%).  $R_f = 0.22$ ; M.p. 127–136 °C; <sup>1</sup>H NMR (400 MHz, CDCl<sub>3</sub>, CO<sub>2</sub>H signal too broad to be observed):  $\delta = 8.49$  (br s, NH, 1 H), 8.39 (br s, NH, 1 H), 7.80–7.77 (m, NH, 3 H), 7.61 (br s, NH, 1 H), 7.39 (s, TriazH, 1 H), 7.38 (s, TriazH, 3 H), 7.22–7.18 (m, NH and TriazH, 4 H), 7.14–7.05 (m, ArH, 18 H), 6.89 (d, ArH,  $J = 7.8$  Hz, 2 H), 6.75 (br s, NH, 1 H), 4.56–4.45 (m, TriazCH<sub>2</sub>CH<sub>2</sub> and NHCH<sub>2</sub>Triaz, 20 H), 3.70 (s, OCH<sub>3</sub>, 3 H), 3.63–3.61 (m, CH<sub>2</sub>CH<sub>2</sub>NH, 2 H), 3.50–3.45 (m, CH<sub>2</sub>CH<sub>2</sub>NH, 8 H), 3.17–3.08 (m, ArCH<sub>2</sub>, 10 H), 2.79–2.73 (m, ArCH<sub>2</sub>, 10 H), 1.96–1.67 (m, 24 H), 1.25–1.15 (m, 252 H), 0.86–0.83 (m, CH<sub>2</sub>CH<sub>3</sub>, 72 H); <sup>13</sup>C NMR (125 MHz, CDCl<sub>3</sub>):  $\delta = 175.8, 173.9, 173.7, 173.3, 173.2, 173.1, 171.6, 144.9, 144.6, 144.5, 143.9, 137.94, 137.92, 137.8, 135.4, 135.2, 135.1, 129.4, 129.29, 129.26, 129.1, 129.00, 128.97, 123.0, 122.4, 122.0, 58.1, 57.3, 57.1, 57.0, 52.4, 52.0, 51.7, 41.1, 40.3, 38.8, 38.0, 37.9, 37.5, 37.4, 37.32, 37.26, 37.09, 37.06, 36.7, 36.6, 35.6, 35.5, 35.3, 35.0, 34.1, 33.67, 33.66, 33.3, 33.2, 32.1, 30.0, 29.8, 28.94, 28.91, 28.89, 26.8, 26.74, 26.69, 26.6, 23.3, 22.8, 22.44, 22.40, 22.2, 14.32, 14.27$  ppm; accurate mass (ESI) calcd for [C<sub>252</sub>H<sub>437</sub>N<sub>25</sub>O<sub>14</sub> + 2Na]<sup>2+</sup>: 2043.2050; found: 2043.2098.

### 3. Gel photos

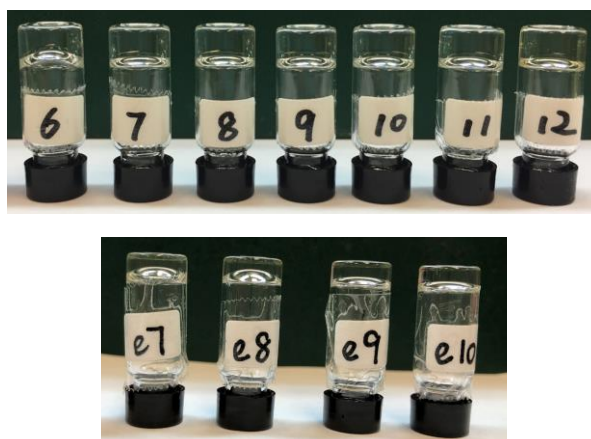

**Figure S1.** Photos of transparent *p*-xylene gels (2.5% w/v). (top) From left to right: **OAT-CO<sub>2</sub>H-6**, **OAT-COPrg-7**, **OAT-CO<sub>2</sub>H-8**, **OAT-COPrg-9**, **OAT-CO<sub>2</sub>H-10**, **OAT-COPrg-11** and **OAT-CO<sub>2</sub>H-12**. (bottom) From left to right: **OATe-COPrg-7**, **OATe-CO<sub>2</sub>H-8**, **OATe-COPrg-9** and **OATe-CO<sub>2</sub>H-10**.



#### 4. Fourier transformed infrared spectroscopy

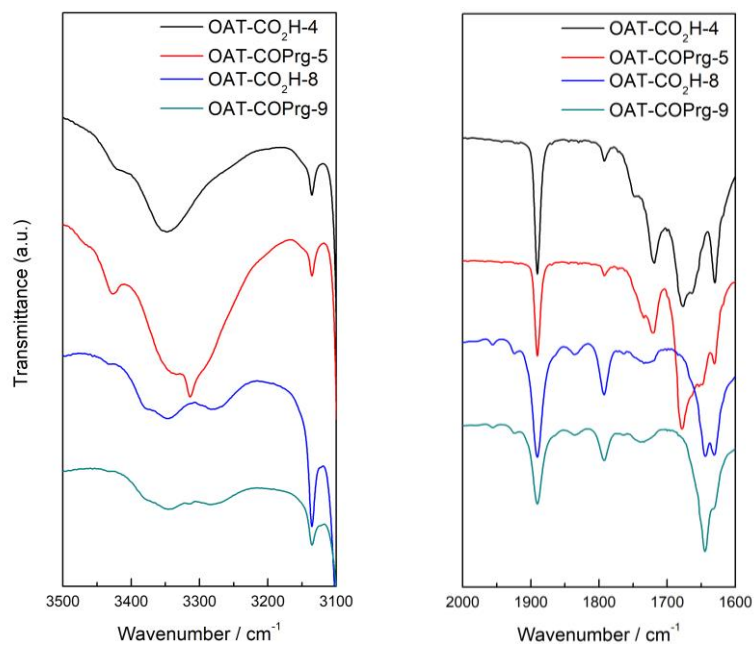

**Figure S2.** Stacked partial FTIR (2.5% w/v in *p*-xylene) spectra of oligomers (from top to bottom: OAT-CO<sub>2</sub>H-4, OAT-COPrg-5, OAT-CO<sub>2</sub>H-8 and OAT-COPrg-9).

## 5. Small angle powdered X-ray diffraction

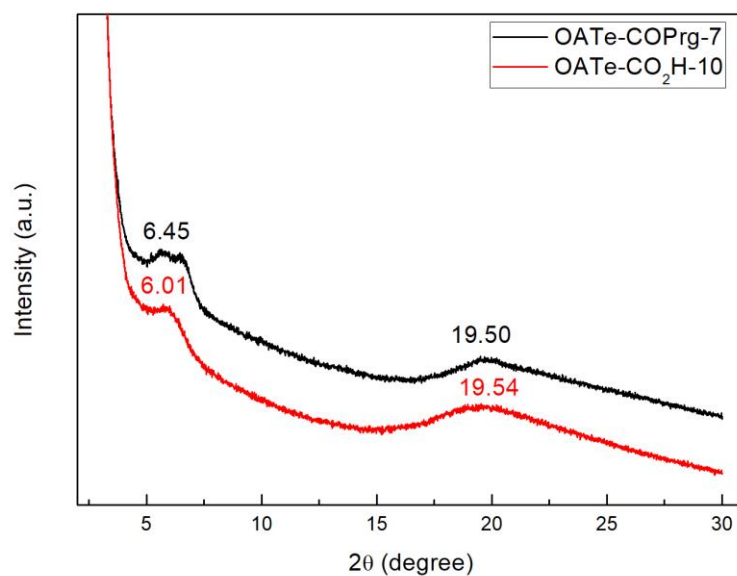

**Figure S3.** SAXRD patterns of 2.5% *w/v* xerogels from *p*-xylene of **OATe-COPrg-7** (black) and **OATe-CO<sub>2</sub>H-10** (red). The positions of two peaks were very similar to those of the **OAT** series.

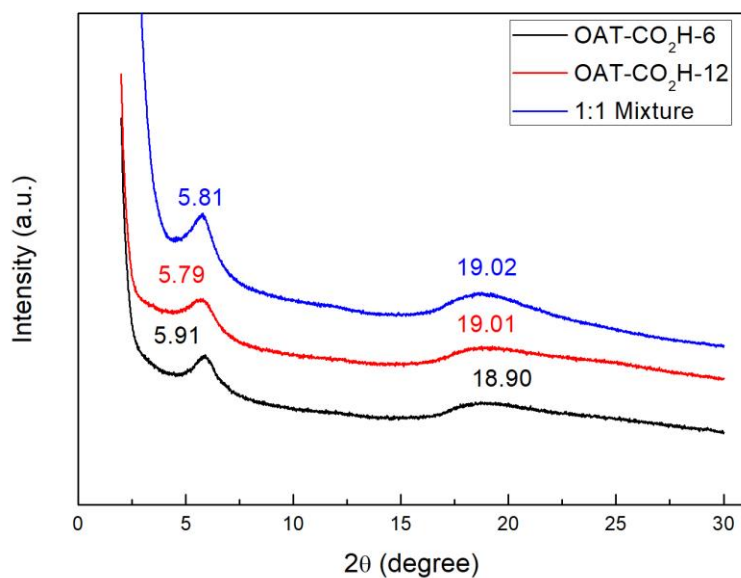

**Figure S4.** SAXRD patterns of 2.5% *w/v* xerogels from *p*-xylene of **OAT-CO<sub>2</sub>H-6** (black), **OAT-CO<sub>2</sub>H-12** (red) and their 1:1 mixture (blue).

## 6. Determination of dimerization constant - $^1\text{H}$ NMR dilution experiment

$^1\text{H}$  NMR dilution experiment was carried out using **OAT-CO<sub>2</sub>H-6** in  $\text{CDCl}_3$ . Two CONH signals exhibited significant shifting of chemical shift (Figure S4). The data were fitted into the dimerization model described by Hunter.<sup>4</sup> The fitting results were listed in Table S1.

$$\sigma_{obs} = \sigma_d - (\sigma_d - \sigma_m) \frac{-1 + \sqrt{1 + 8K_{dim}c_t}}{4K_{dim}c_t}$$

where

$\sigma_{obs}$  is the observed chemical shift of a NMR signal,

$\sigma_d$  is the chemical shift of dimer  $\text{A}_2$ ,

$\sigma_m$  is the chemical shift of monomer  $\text{A}$ ,

$c_t$  is the total concentration of  $\text{A}$

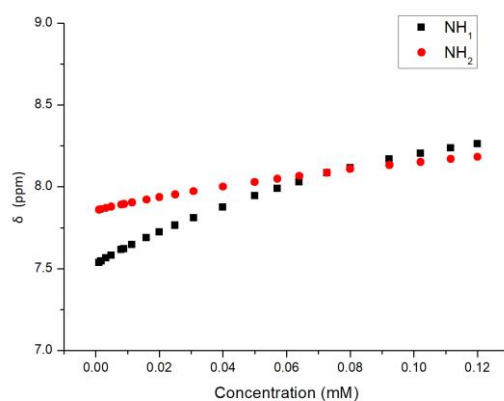

**Figure S5.** Concentration-dependent variation of chemical shifts of two CONHs of **OAT-CO<sub>2</sub>H-6** (700 MHz,  $\text{CDCl}_3$ , 25 °C).

**Table S1.** Summary of the parameters obtained from the best fit of concentration-dependent  $^1\text{H}$  NMR chemical shift variation of two NH signals of **OAT-CO<sub>2</sub>H-6**.

|                               | NH <sub>1</sub>  | NH <sub>2</sub>  |
|-------------------------------|------------------|------------------|
| $r^2$                         | 0.9996           | 0.9998           |
| $K_{dim}$ ( $\text{M}^{-1}$ ) | $2.1 \pm 0.1$    | $1.5 \pm 0.05$   |
| $\delta_m$ (ppm)              | $7.53 \pm 0.003$ | $7.86 \pm 0.001$ |
| $\delta_d$ (ppm)              | $10.28 \pm 0.08$ | $9.38 \pm 0.04$  |

<sup>4</sup> Hunter, C. A. et al. *J. Am. Chem. Soc.* **2000**, *122*, 8856–8868.

## 7. DSC thermograms

### (a) Pure wet gels

DSC profile of the wet gels all showed only one endothermic peak upon heating indicated that the gel state was homogeneous involving mainly one single phase transition (Figures S5–S6).

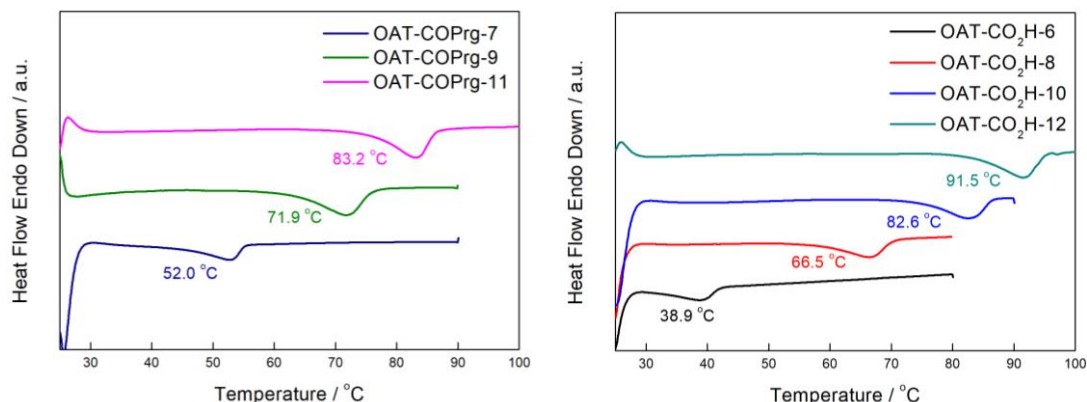

**Figure S6.** DSC thermograms of wet gels in *p*-xylene (2.5% w/v), left: **OAT-COPrg-(2n+1)** series; right: **OAT-CO<sub>2</sub>H-2n** series. The value of endothermic peak represents the gel-to-sol temperature ( $T_{gs}$ ).

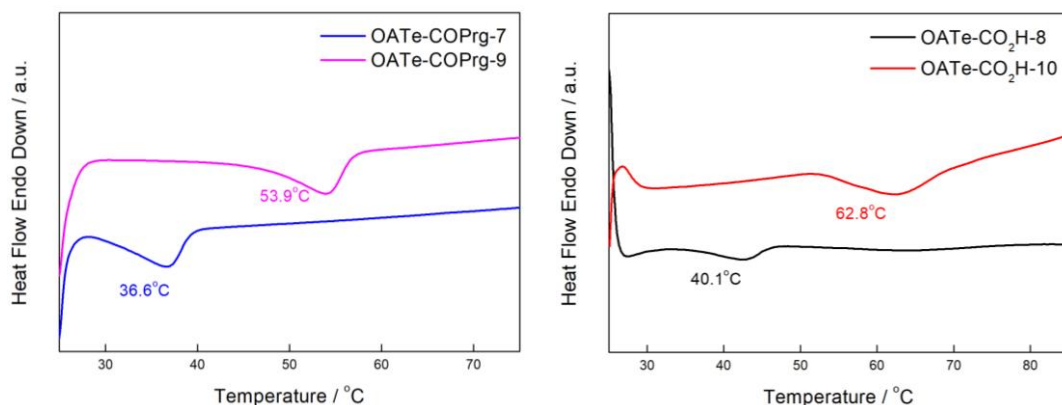

**Figure S7.** DSC thermograms of wet gels in *p*-xylene (2.5% w/v), left: **OATe-CO<sub>2</sub>Prg-(2n+1)** series; right: **OATe-CO<sub>2</sub>H-2n** series. The value of endothermic peak represents the gel-to-sol temperature ( $T_{gs}$ ).

### (b) Xerogels

(i) *N*-Propargyl amide terminated oligomers: A xerogel sample of **OAT-COPrg-(2n+1)** or **OATe-COPrg-(2n+1)** (2.5% in *p*-xylene) was subjected to first heating (rate = 10 °C/min) to give one solid-to-liquid melting peak ( $T_m$ ) (Figures S7 and S8). After annealing at 200 °C for 5 min, cooling down to 40 °C (rate = -5 °C/min) and reheating (rate = 10 °C/min) again generated the second heating curve. For the **OAT-**

**COPrg(2n+1)** series, one melting peak was identified, but the  $\Delta H_m$  and  $\Delta S_m$  values decreased sharply as compared to those of the first cycle (Table S2). On the other hand, no peak could be found in the second heating profile for the **OATe-COPrg(2n+1)** series.

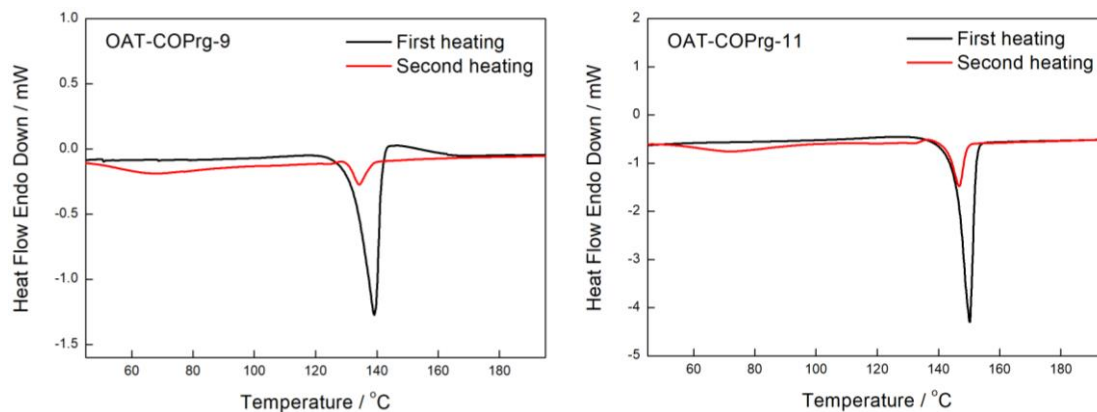

**Figure S8.** DSC thermograms of xerogels of **OAT-COPrg-(2n+1)**.

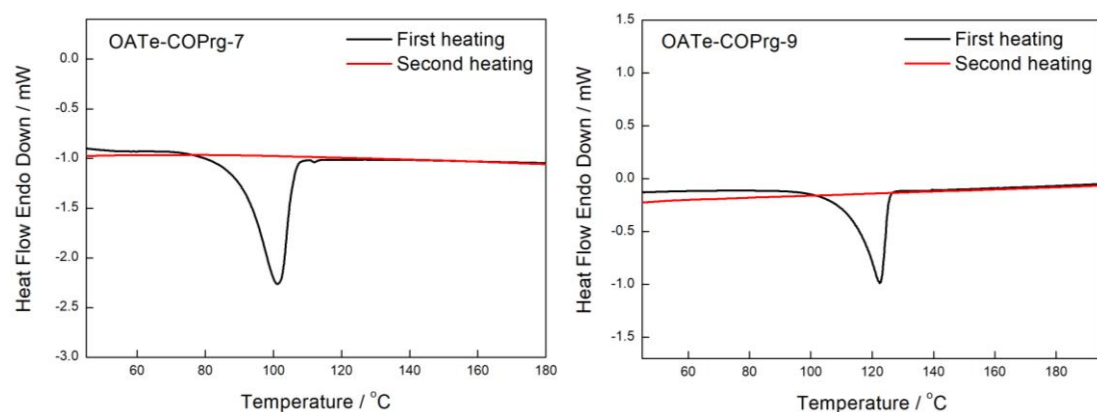

**Figure S9.** DSC thermograms of xerogels of **OATe-COPrg-(2n+1)**.

**Table S2.**  $T_m$ ,  $\Delta H_m$  and  $\Delta S_s$  values of xerogels of **OAT-COPrg-(2n+1)** and **OATe-COPrg-(2n+1)** before and after annealing.

| Compound            | First heating cycle |                                      |                                                                         | Second heating cycle |                                      |                                                                         |
|---------------------|---------------------|--------------------------------------|-------------------------------------------------------------------------|----------------------|--------------------------------------|-------------------------------------------------------------------------|
|                     | $T_m$<br>(°C)       | $\Delta H_m$<br>(J·g <sup>-1</sup> ) | $\Delta S_m$<br>(J·g <sup>-1</sup> ·K <sup>-1</sup> ) × 10 <sup>3</sup> | $T_m$<br>(°C)        | $\Delta H_m$<br>(J·g <sup>-1</sup> ) | $\Delta S_m$<br>(J·g <sup>-1</sup> ·K <sup>-1</sup> ) × 10 <sup>3</sup> |
| <b>OAT-COPrg-7</b>  | 123                 | 34.2                                 | 87.9                                                                    | 118                  | 5.2                                  | 11.3                                                                    |
| <b>OAT-COPrg-9</b>  | 139                 | 31.6                                 | 74.1                                                                    | 134                  | 3.0                                  | 7.3                                                                     |
| <b>OAT-COPrg-11</b> | 150                 | 36.1                                 | 86.8                                                                    | 147                  | 8.2                                  | 19.5                                                                    |
| <b>OATe-COPrg-7</b> | 101                 | 33.9                                 | 89.5                                                                    | —                    | —                                    | —                                                                       |
| <b>OATe-COPrg-9</b> | 122                 | 34.9                                 | 88.8                                                                    | —                    | —                                    | —                                                                       |

(ii) Effect of cooling profile on the DSC thermograms of **OAT-COPrg-(2n+1)**: DSC experiments on **OAT-COPrg-7** and **OAT-COPrg-9** following different cooling protocols were conducted (Scheme S1) and the corresponding  $\Delta H_m$  values were listed (Table S3).

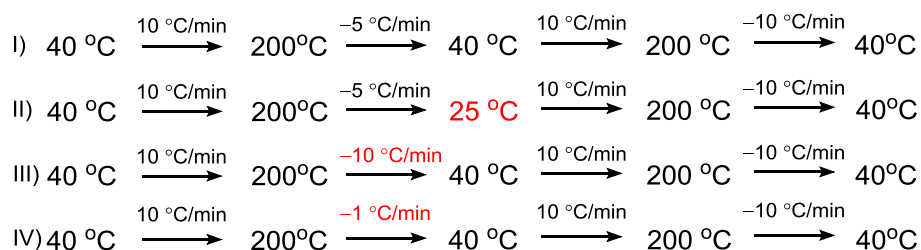

**Scheme S1.** DSC cooling protocols.

**Table S3.**  $\Delta H_m$  value changes of **OAT-COPrg-7** and **OAT-COPrg-9** under different cooling protocols.<sup>a</sup>

| Cooling protocol | <b>OAT-COPrg-7</b>                                  |                                                     |                               | <b>OAT-COPrg-9</b>                                  |                                                     |                               |
|------------------|-----------------------------------------------------|-----------------------------------------------------|-------------------------------|-----------------------------------------------------|-----------------------------------------------------|-------------------------------|
|                  | $\Delta H_{m1}$<br>( $\text{J}\cdot\text{g}^{-1}$ ) | $\Delta H_{m2}$<br>( $\text{J}\cdot\text{g}^{-1}$ ) | $\Delta H_{m2}/\Delta H_{m1}$ | $\Delta H_{m1}$<br>( $\text{J}\cdot\text{g}^{-1}$ ) | $\Delta H_{m2}$<br>( $\text{J}\cdot\text{g}^{-1}$ ) | $\Delta H_{m2}/\Delta H_{m1}$ |
| I                | 34.3                                                | 5.0                                                 | 14.6%                         | 30.7                                                | 2.9                                                 | 9.6%                          |
| II               | 28.2                                                | 3.2                                                 | 11.2%                         | 32.0                                                | 3.4                                                 | 10.7%                         |
| III              | 33.0                                                | 2.9                                                 | 8.8%                          | 29.87                                               | 1.9                                                 | 6.3%                          |
| IV               | 29.3                                                | 10.4                                                | 35.6%                         | 39.64                                               | 12.9                                                | 32.5%                         |

<sup>a</sup>  $\Delta H_{m1}$  and  $\Delta H_{m2}$  are the enthalpy of solid-to-liquid melting values of the first and second heating, respectively.

(iii) Carboxylic acid- and hydride-terminated oligomers: A xerogel sample of **OAT-CO<sub>2</sub>H-2n** or **OATe-CO<sub>2</sub>H-2n** (2.5% in *p*-xylene) was subjected to first heating (rate = 10 °C/min) to give one solid-to-liquid melting peak ( $T_m$ ) (Figures S9 and S10). After annealing at 200 °C for 5 min, cooling down (rate = -5 °C/min) to 40 °C and reheating (rate = 10 °C/min) again generated the second heating curve. In the second scanning profile, a decarboxylation reaction occurred and the DSC profile was, accordingly, that of **OAT-H-2n** or **OATe-H-2n**, respectively. The  $T_m$ ,  $\Delta H_m$  and  $\Delta S_m$  values were tabulated (Table S4).

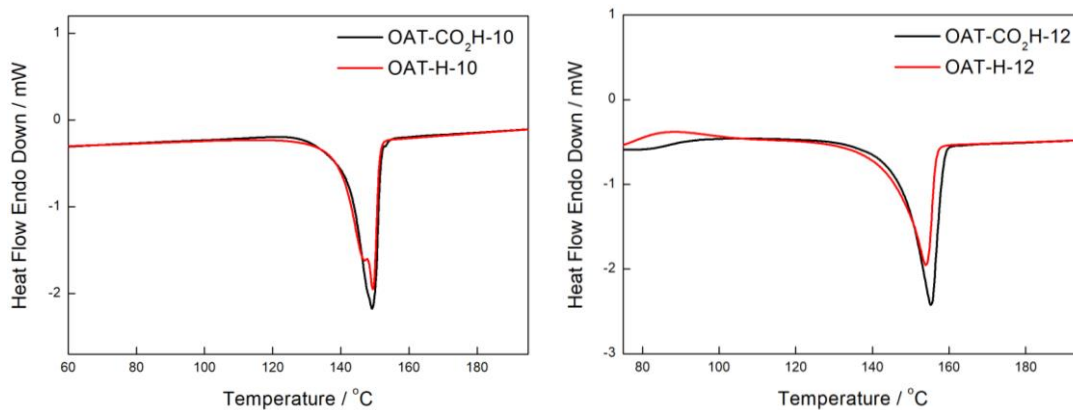

**Figure S10.** DSC thermograms of xerogels of **OAT-CO<sub>2</sub>H-2n** and **OAT-H-2n** series.

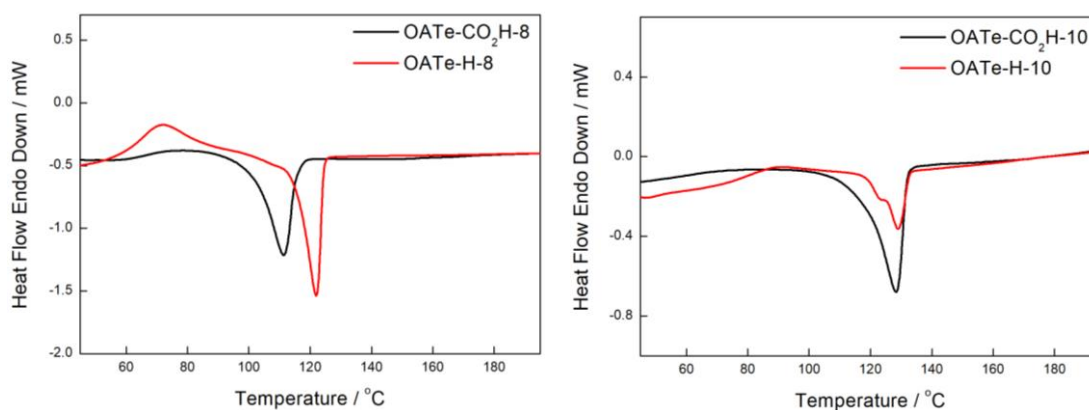

**Figure S11.** DSC thermograms of xerogels of **OATe-CO<sub>2</sub>H-2n** and **OATe-H-2n** series.

**Table S4.**  $T_m$ ,  $\Delta H_m$  and  $\Delta S_m$  values of xerogels of **OAT-CO<sub>2</sub>H-2n**, **OATe-CO<sub>2</sub>H-2n**, **OAT-H-2n** and **OATe-H-2n**.

| Compound                       | $T_m$<br>(°C) | $\Delta H_m$<br>(J·g <sup>-1</sup> ) | $\Delta S_m$<br>(J·g <sup>-1</sup> ·K <sup>-1</sup> )<br>× 10 <sup>3</sup> | Compound         | $T_m$<br>(°C) | $\Delta H_m$<br>(J·g <sup>-1</sup> ) | $\Delta S_m$<br>(J·g <sup>-1</sup> ·K <sup>-1</sup> )<br>× 10 <sup>3</sup> |
|--------------------------------|---------------|--------------------------------------|----------------------------------------------------------------------------|------------------|---------------|--------------------------------------|----------------------------------------------------------------------------|
| <b>OAT-CO<sub>2</sub>H-6</b>   | 100           | 21.0                                 | 55.5                                                                       | <b>OAT-H-6</b>   | 117           | 20.3                                 | 48.5                                                                       |
| <b>OAT-CO<sub>2</sub>H-8</b>   | 132           | 25.0                                 | 65.6                                                                       | <b>OAT-H-8</b>   | 137           | 24.8                                 | 57.8                                                                       |
| <b>OAT-CO<sub>2</sub>H-10</b>  | 149           | 29.9                                 | 73.6                                                                       | <b>OAT-H-10</b>  | 149           | 27.2                                 | 63.0                                                                       |
| <b>OAT-CO<sub>2</sub>H-12</b>  | 155           | 30.7                                 | 74.6                                                                       | <b>OAT-H-12</b>  | 154           | 24.8                                 | 60.4                                                                       |
|                                |               |                                      |                                                                            |                  |               |                                      |                                                                            |
| <b>OATe-CO<sub>2</sub>H-8</b>  | 111           | 21.3                                 | 57.5                                                                       | <b>OATe-H-8</b>  | 122           | 20.9                                 | 57.8                                                                       |
| <b>OATe-CO<sub>2</sub>H-10</b> | 128           | 18.9                                 | 48.0                                                                       | <b>OATe-H-10</b> | 129           | 7.5                                  | 20.5                                                                       |

(c) Self-sorting of mixed xerogels

(i) **OAT-CO<sub>2</sub>H-6/OAT-CO<sub>2</sub>H-10** and **OAT-H-6/OAT-H-10**

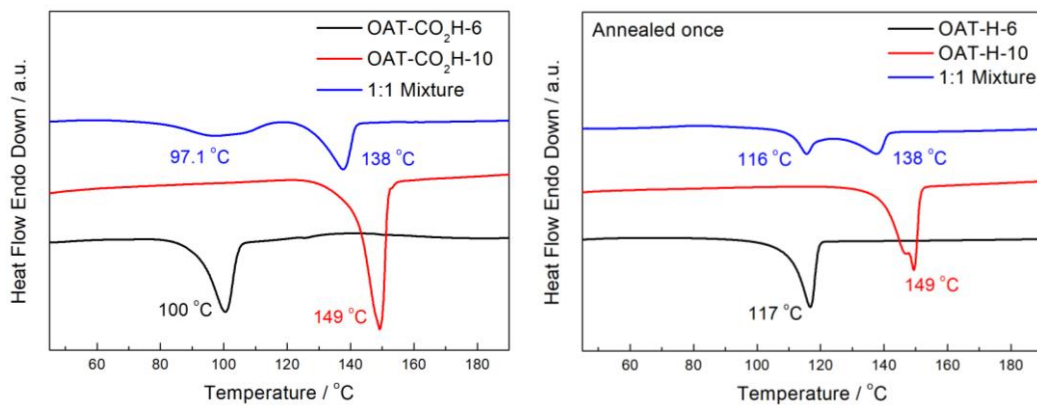

**Figure S12.** Left: DSC thermograms of xerogels (2.5 % *w/v* in *p*-xylene) of a 1:1 mixture of **OAT-CO<sub>2</sub>H-6/OAT-CO<sub>2</sub>H-10** (blue), pure **OAT-CO<sub>2</sub>H-10** (red), and pure **OAT-CO<sub>2</sub>H-6** (black); Right: DSC thermograms of xerogels of a 1:1 mixture of **OAT-H-6/OAT-H-10** (blue), pure **OAT-H-10** (red), and pure **OAT-H-6** (black).



(ii) **OAT-CO<sub>2</sub>H-2m/OAT-COPrg-(2n+1)** and **OAT-H-2m/OAT-COPrg-(2n+1)**

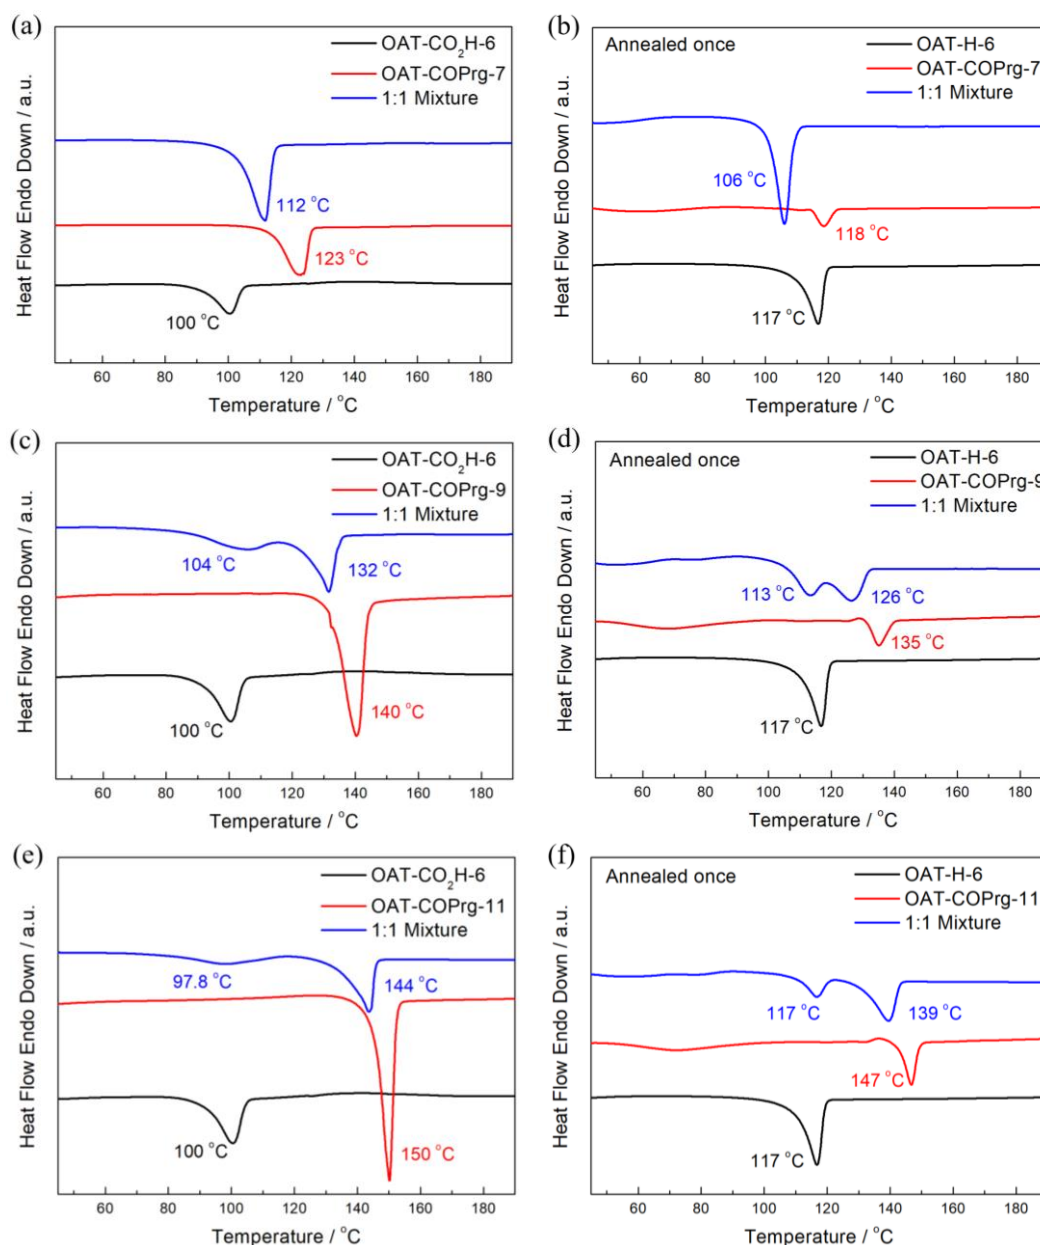

**Figure S13.** (a) DSC thermograms of xerogels (2.5 % w/v in *p*-xylene) of a 1:1 mixture of **OAT-CO<sub>2</sub>H-6/OAT-COPrg-7** (blue), pure **OAT-COPrg-7** (red), and pure **OAT-CO<sub>2</sub>H-6** (black); (b) DSC thermograms of xerogels of a 1:1 mixture of **OAT-H-6/OAT-COPrg-7** (blue), pure **OAT-COPrg-7** (red), and pure **OAT-H-6** (black); (c) DSC thermograms of xerogels (2.5 % w/v in *p*-xylene) of a 1:1 mixture of **OAT-CO<sub>2</sub>H-6/OAT-COPrg-9** (blue), pure **OAT-COPrg-9** (red), and pure **OAT-CO<sub>2</sub>H-6** (black); (d) DSC thermograms of xerogels of a 1:1 mixture of **OAT-H-6/OAT-COPrg-9** (blue), pure **OAT-COPrg-9** (red), and pure **OAT-H-6** (black); (e) DSC thermograms of xerogels (2.5 % w/v in *p*-xylene) of a 1:1 mixture of **OAT-CO<sub>2</sub>H-6/OAT-COPrg-11** (blue), pure **OAT-COPrg-11** (red), and pure **OAT-CO<sub>2</sub>H-6** (black); (f) DSC thermograms of xerogels of a 1:1 mixture of **OAT-H-6/OAT-COPrg-11** (blue), pure **OAT-COPrg-11** (red), and pure **OAT-H-6** (black).

(d) Semi-quantitative assessment of self-sorting: In the xerogel phase diagrams of these oligomers, it was noticed that the eutectic temperature was very close to the  $T_m$  of the lower oligomer, such that the terminal solid solution zone was too narrow to be represented on the phase diagram. In such a simplified case where the terminal solid solution zone is not observable, we could make the following rationalizations.

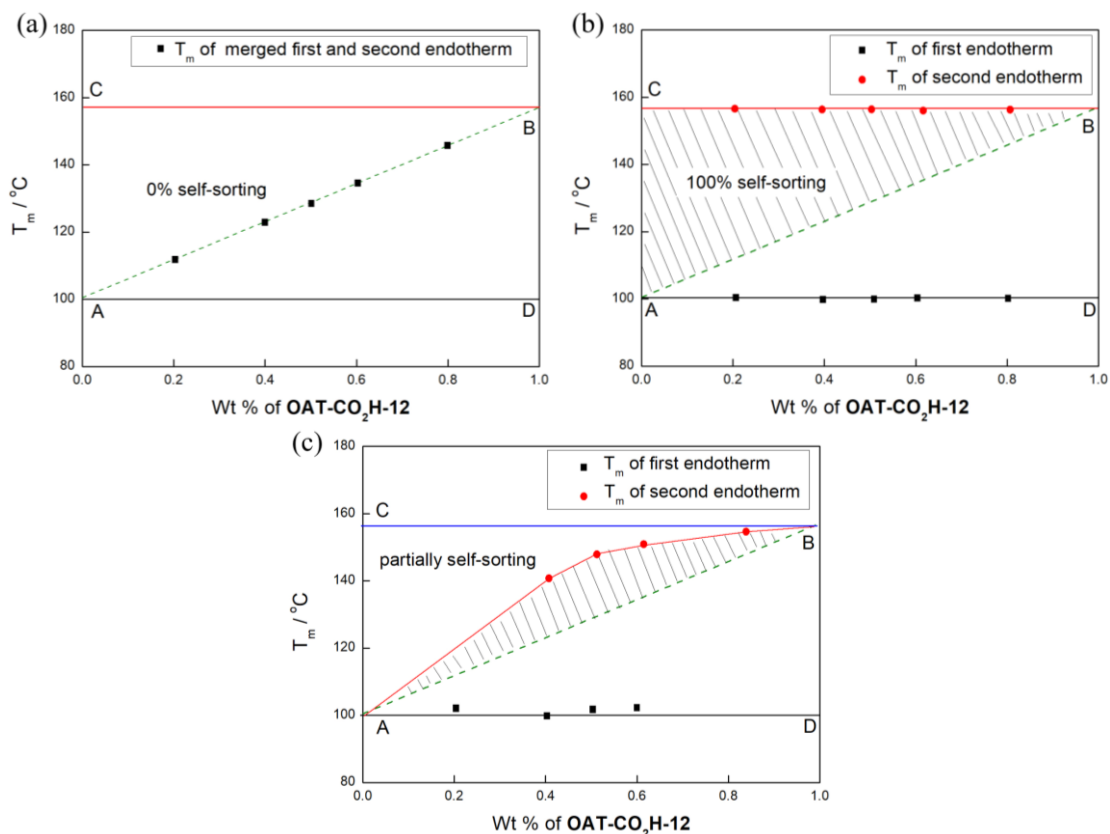

**Figure S14.** Hypothetical phase diagrams of (a) 0% self-sorted, (b) 100% self-sorted and (c) partially self-sorted systems.

(i) In a completely non-self-sorted system, the first and second endotherm peaks will merge together, and only one  $T_m$ , whose value will depend upon the molecular composition, will show up on the green dash line  $AB$  (Figure S13a).

(ii) In a hypothetical 100% self-sorted mixed gel system, two  $T_m$  points, each corresponds to the  $T_m$  of the two pure samples, should always be observed and they appear as the horizontal lines  $AD$  (black) and  $CB$  (red) (Figure S13b).

(iii) While for a partially self-sorted mixture, in some composition range only one  $T_m$  can be identified (*i.e.* non-self-sorted composition), and in another composition range, two  $T_m$  values can be found (*i.e.* fully or partially self-sorted composition), and

the higher  $T_m$  value will locate within any position inside the triangle  $\Delta ABC$  (Figure S13c). As a result, the polygonal red line  $AFB$  is always on the top of the dashed line  $AB$ . According to above elaborations, we proposed the ratio ( $\beta$ ) of the area of the shadowed polygon to the area of the triangle ( $ABC$ ) can be used to represent the degree of self-sorting in the binary mixture. The extents of self-sorting of the various mixed xerogels were then calculated from the corresponding phase diagrams (Figure S14).

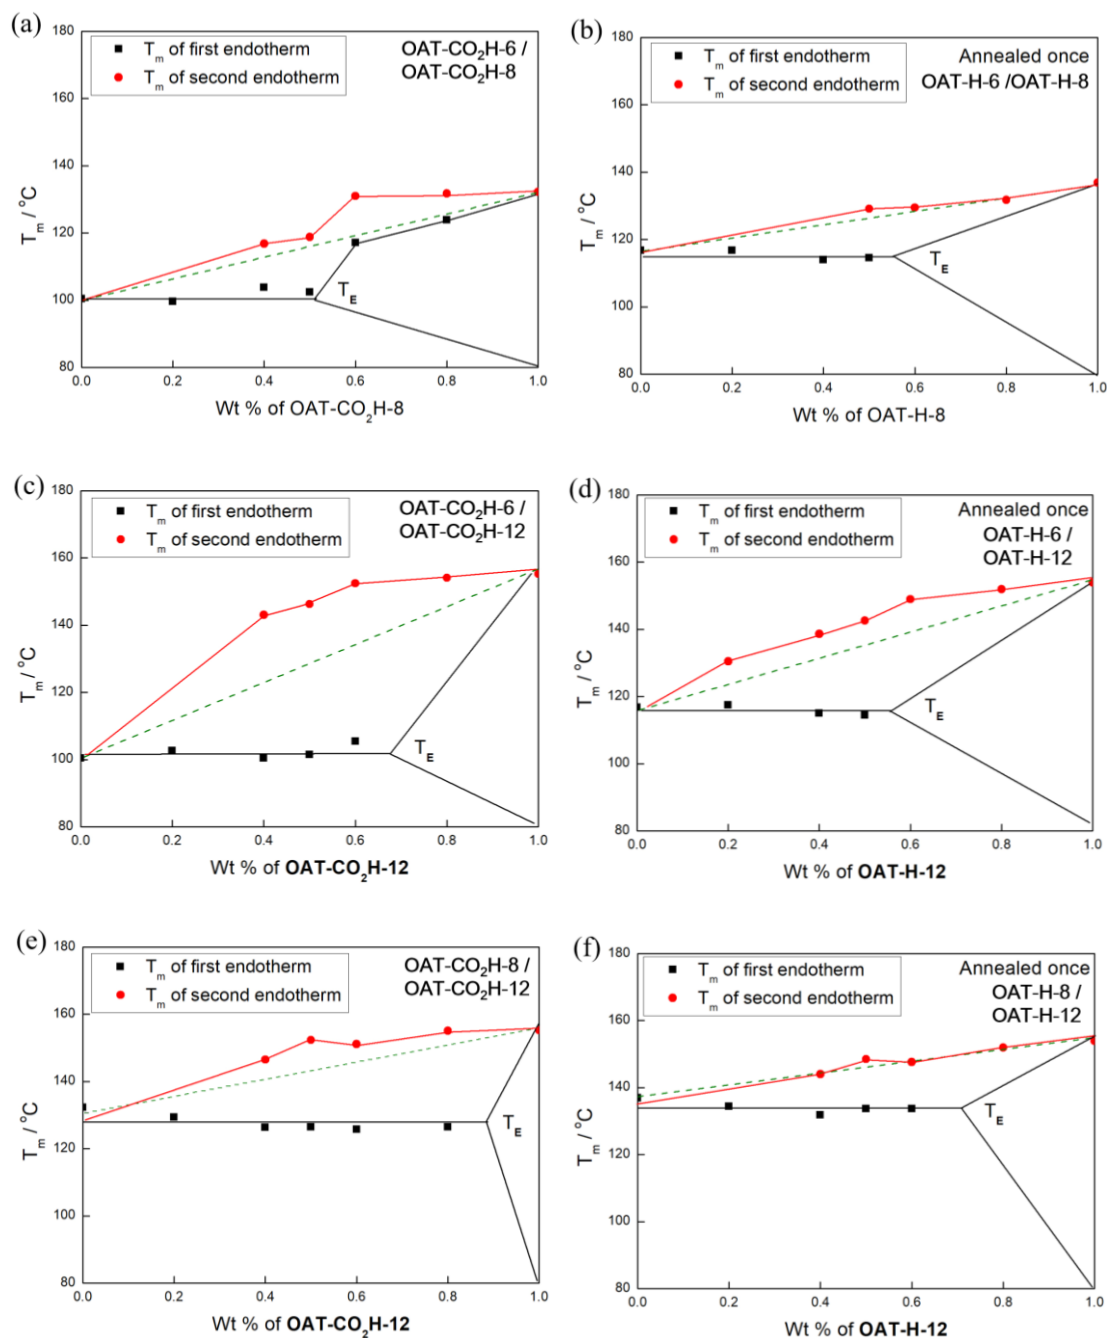

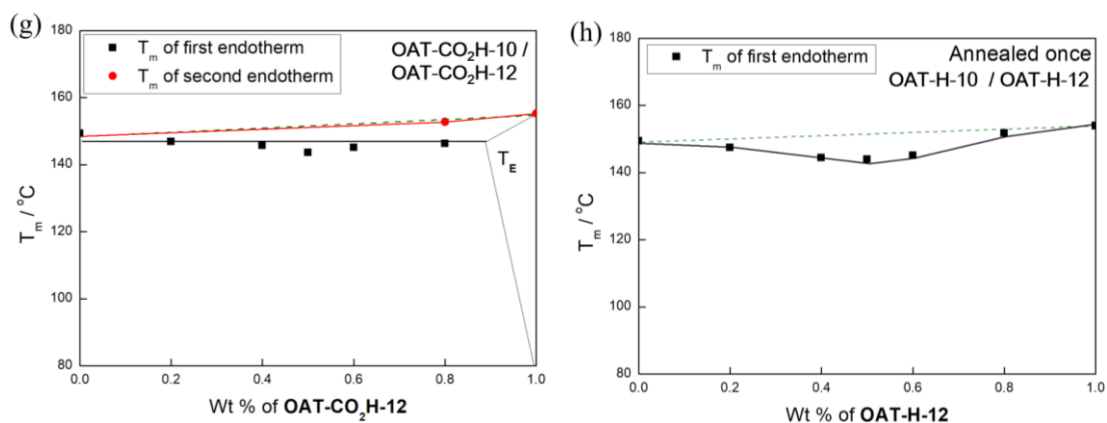

**Figure S15.** Melting temperatures ( $T_m$ ) at various compositions and the miscibility curve (---) for (a) xerogels of OAT-CO<sub>2</sub>H-6/OAT-CO<sub>2</sub>H-8, (b) annealed blends of OAT-H-6/OAT-H-8, (c) xerogels of OAT-CO<sub>2</sub>H-8/OAT-CO<sub>2</sub>H-12, (d) annealed blends of OAT-H-6/OAT-H-12, (e) xerogels of OAT-CO<sub>2</sub>H-8/OAT-CO<sub>2</sub>H-12, (f) annealed blends of OAT-H-8/OAT-H-12, (g) xerogels of OAT-CO<sub>2</sub>H-10/OAT-CO<sub>2</sub>H-12, (h) annealed blends of OAT-H-10/OAT-H-12. The black and red symbols represent the  $T_m$  of first and second endothermic peak, respectively, and  $T_E$  denotes the eutectic temperature.

## 8. SEM images

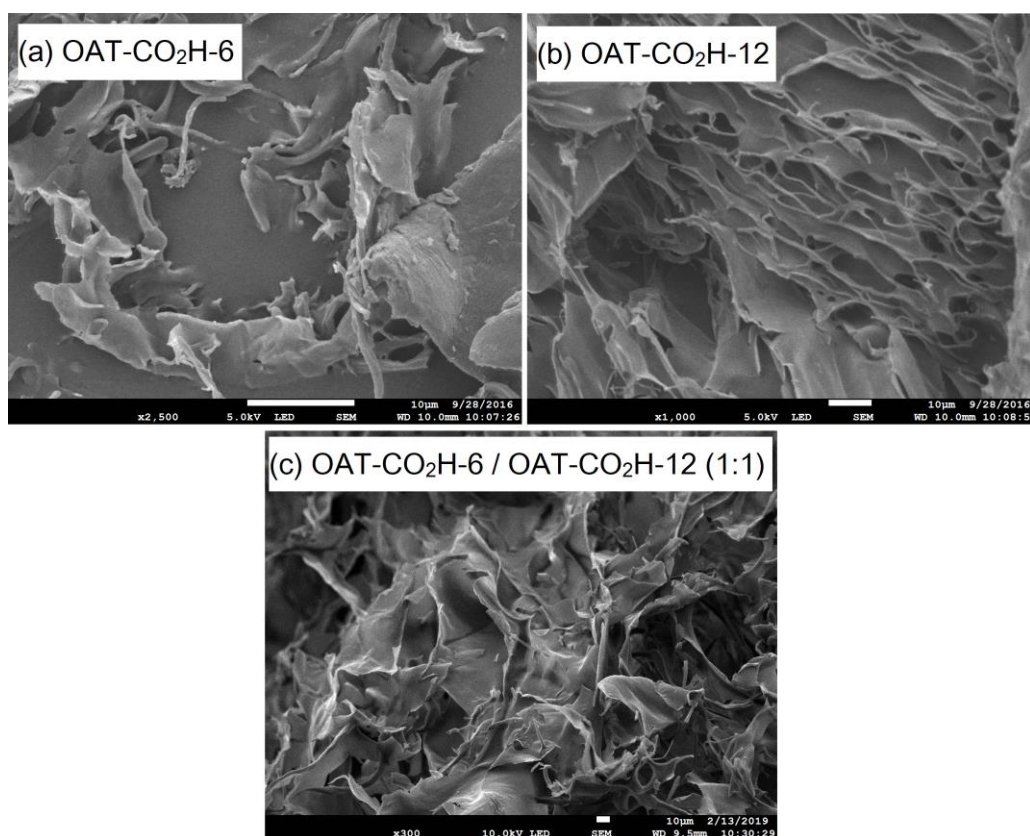

**Figure S16.** SEM images of freeze dried gels of (a) OAT-CO<sub>2</sub>H-6, (b) OAT-CO<sub>2</sub>H-12 and (c) 1:1 mixture of OAT-CO<sub>2</sub>H-6/OAT-CO<sub>2</sub>H-12.

## 9. $^1\text{H}$ NMR spectra of annealed samples

For annealed **OAT-CO<sub>2</sub>H-8**, **OAT-CO<sub>2</sub>H-10** and **OAT-CO<sub>2</sub>H-12**, similar changes were observed in the  $^1\text{H}$  NMR spectra in which one signal of NH was upfield-shifted to about 5.8 ppm and a new small peak showed up at around 2.08 ppm (Figure S15). Such results proved the decarboxylation reaction happened during annealing process. For annealed **OAT-COPrg-7**, no obvious change was found in the spectrum after annealing (Figure S16).

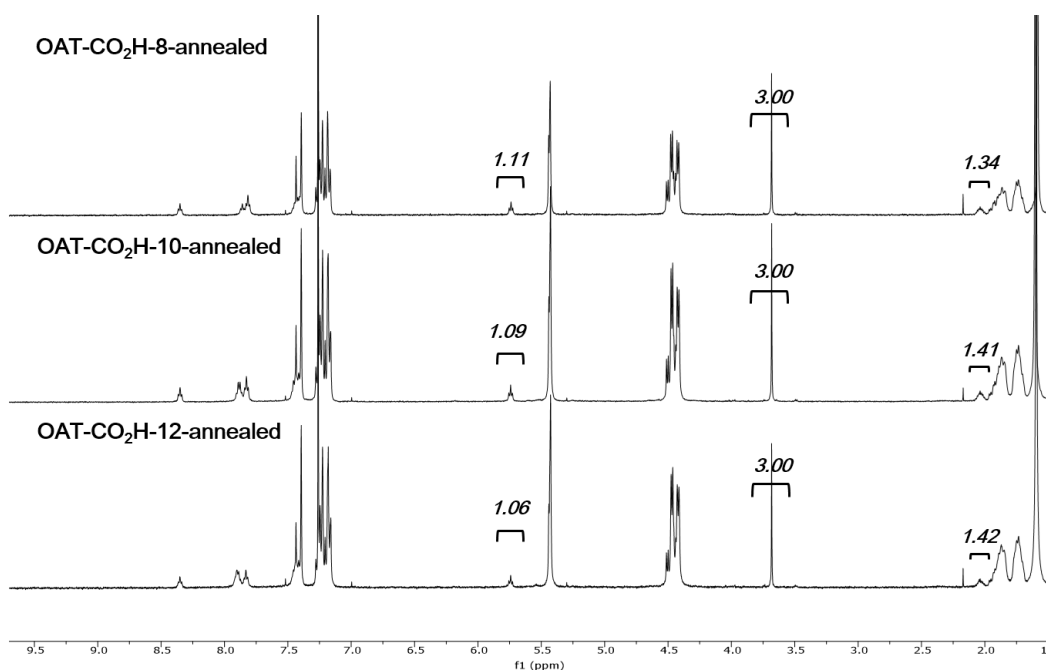

**Figure S17.** Stacked  $^1\text{H}$  NMR (400 MHz,  $\text{CDCl}_3$ , 25  $^\circ\text{C}$ ) spectra of annealed **OAT-CO<sub>2</sub>H-8**, **OAT-CO<sub>2</sub>H-10** and **OAT-CO<sub>2</sub>H-12**.

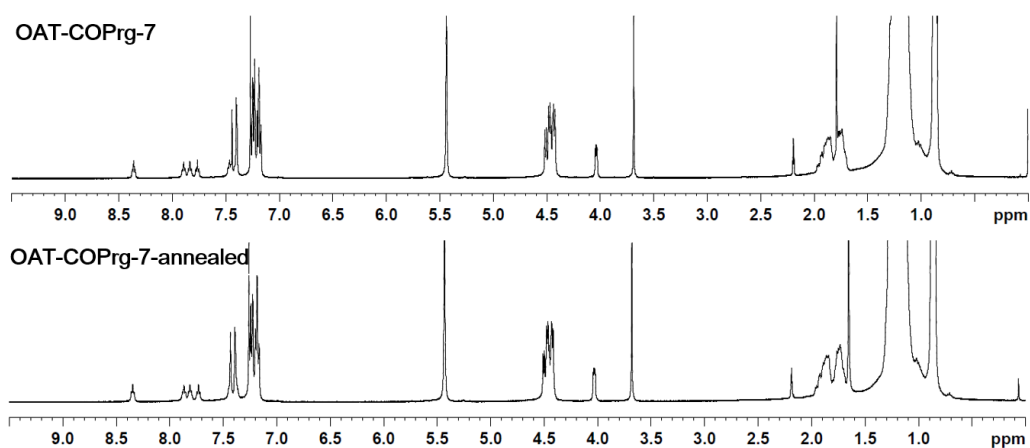

**Figure S18.** Stacked  $^1\text{H}$  NMR (400 MHz,  $\text{CDCl}_3$ , 25  $^\circ\text{C}$ ) spectra of original **OAT-COPrg-7** (top) and annealed **OAT-COPrg-7** (bottom).

## 10. $^1\text{H}$ NMR spectral end group analysis

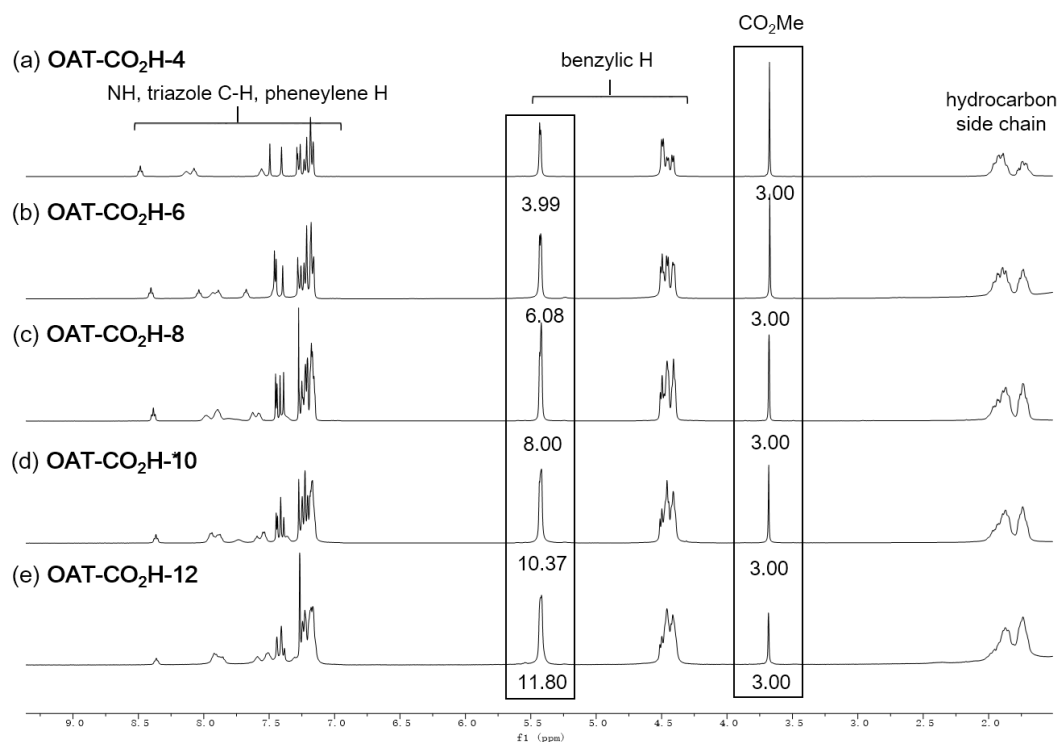

**Figure S19.** Stacked partial  $^1\text{H}$  NMR spectra (400 MHz,  $\text{CDCl}_3$ ) of OAT- $\text{CO}_2\text{H}-2n$  ( $n = 2-6$ ) marked with relative integrals.

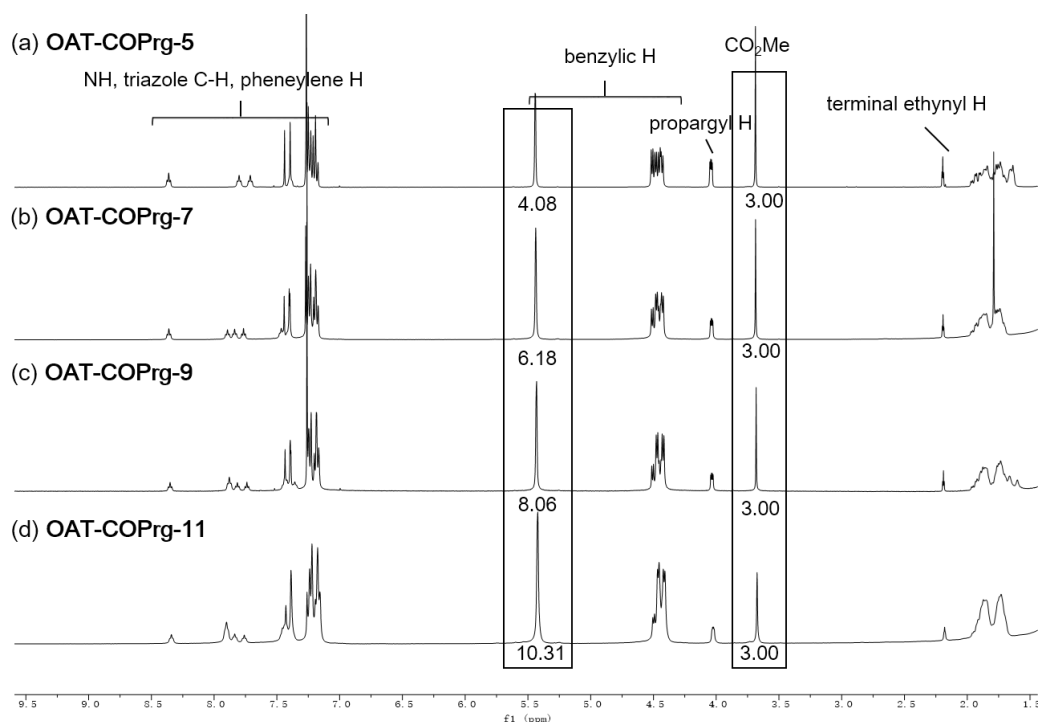

**Figure S20.** Stacked partial  $^1\text{H}$  NMR spectra (400 MHz,  $\text{CDCl}_3$ ) of OAT-COPrg- $(2n+1)$  ( $n = 2-5$ ) marked with relative integrals.

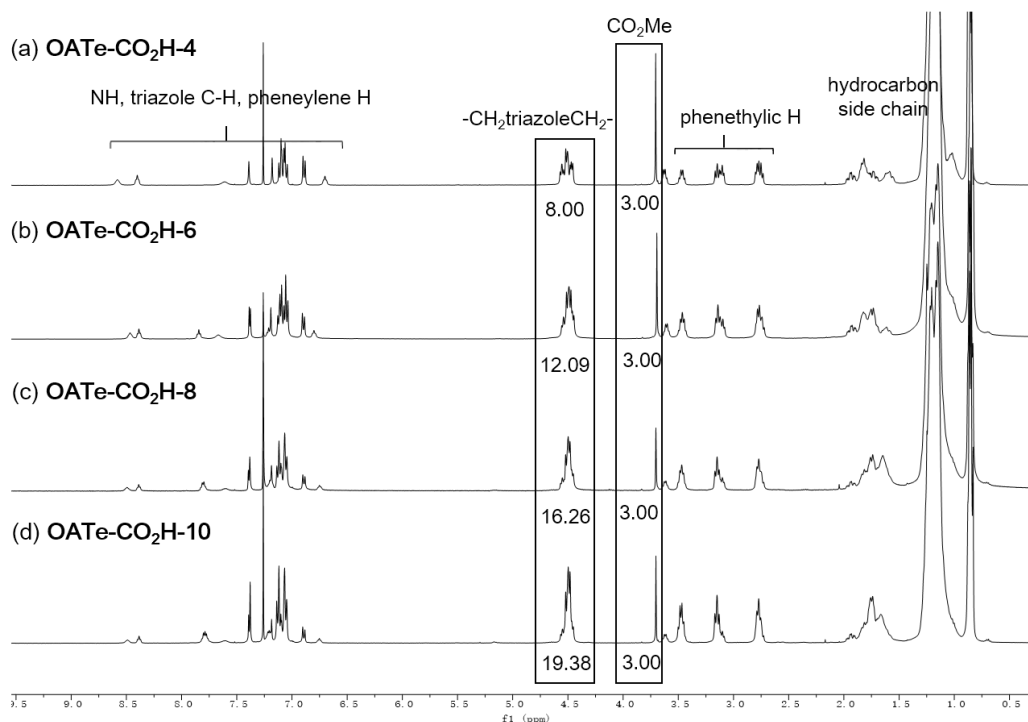

**Figure S21.** Stacked partial  $^1\text{H}$  NMR spectra (400 MHz,  $\text{CDCl}_3$ ) of **OATe-CO<sub>2</sub>H-2n** ( $n = 2-5$ ) marked with relative integrals.

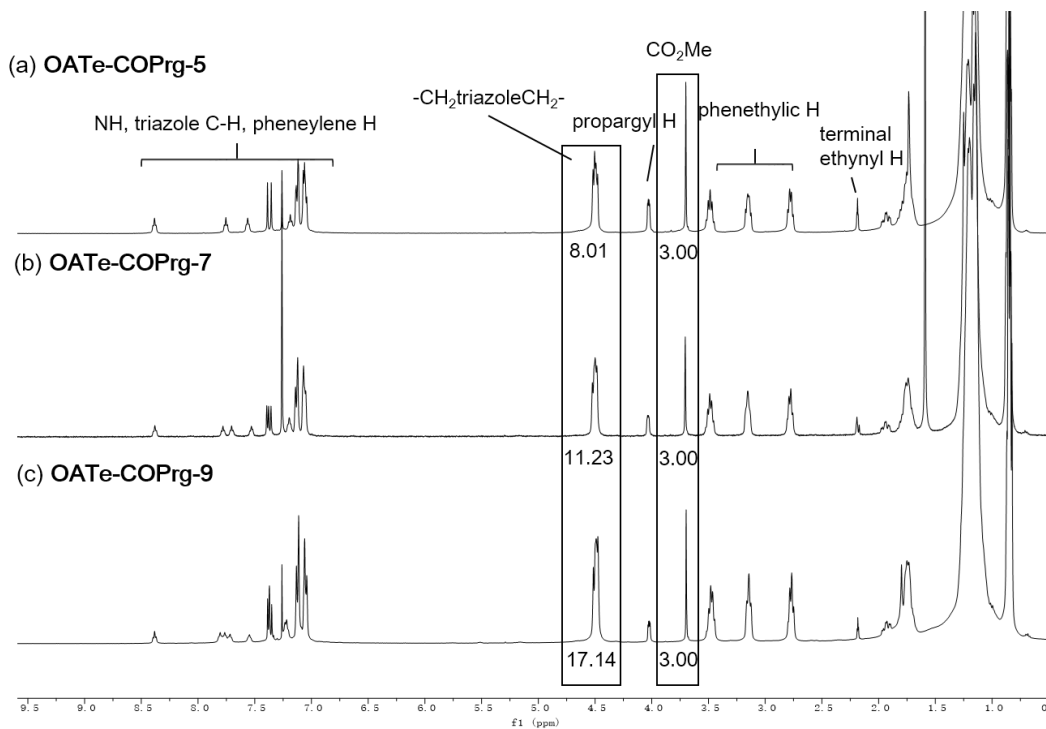

**Figure S22.** Stacked partial  $^1\text{H}$  NMR spectra (400 MHz,  $\text{CDCl}_3$ ) of **OATe-COPrg-(2n+1)** ( $n = 2-4$ ) marked with relative integrals.

## 10. List of spectra



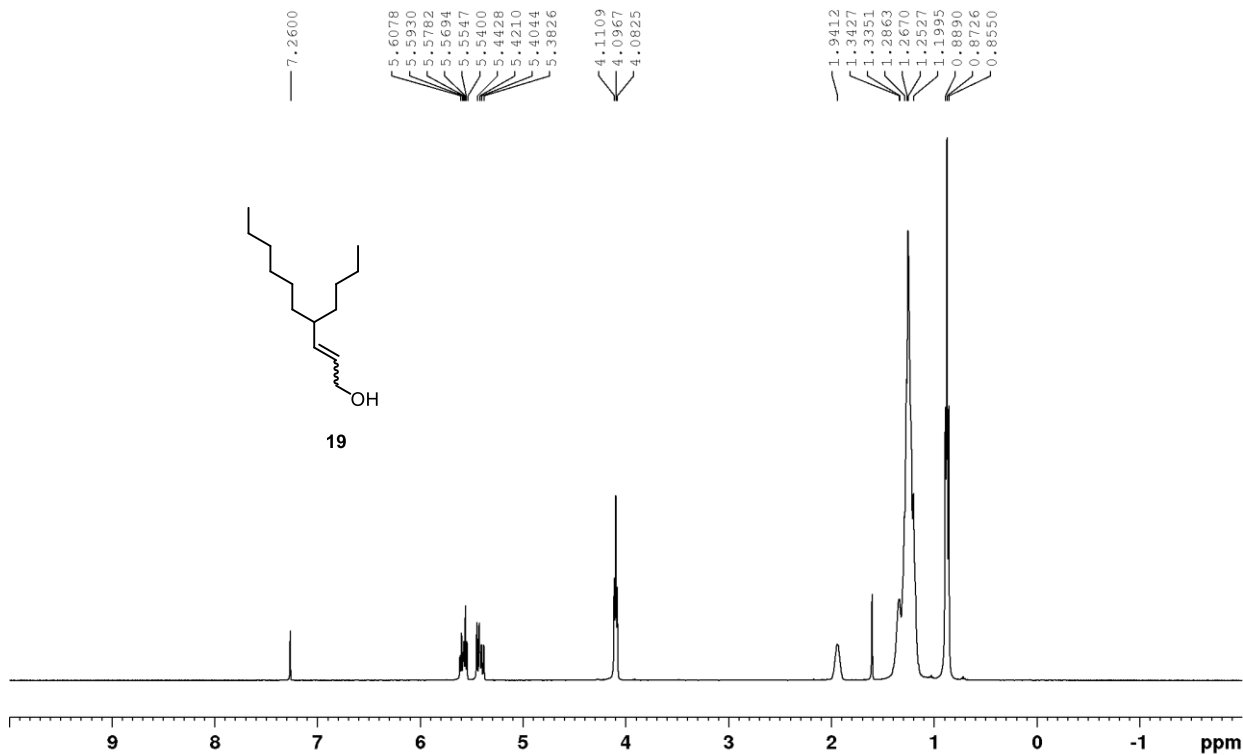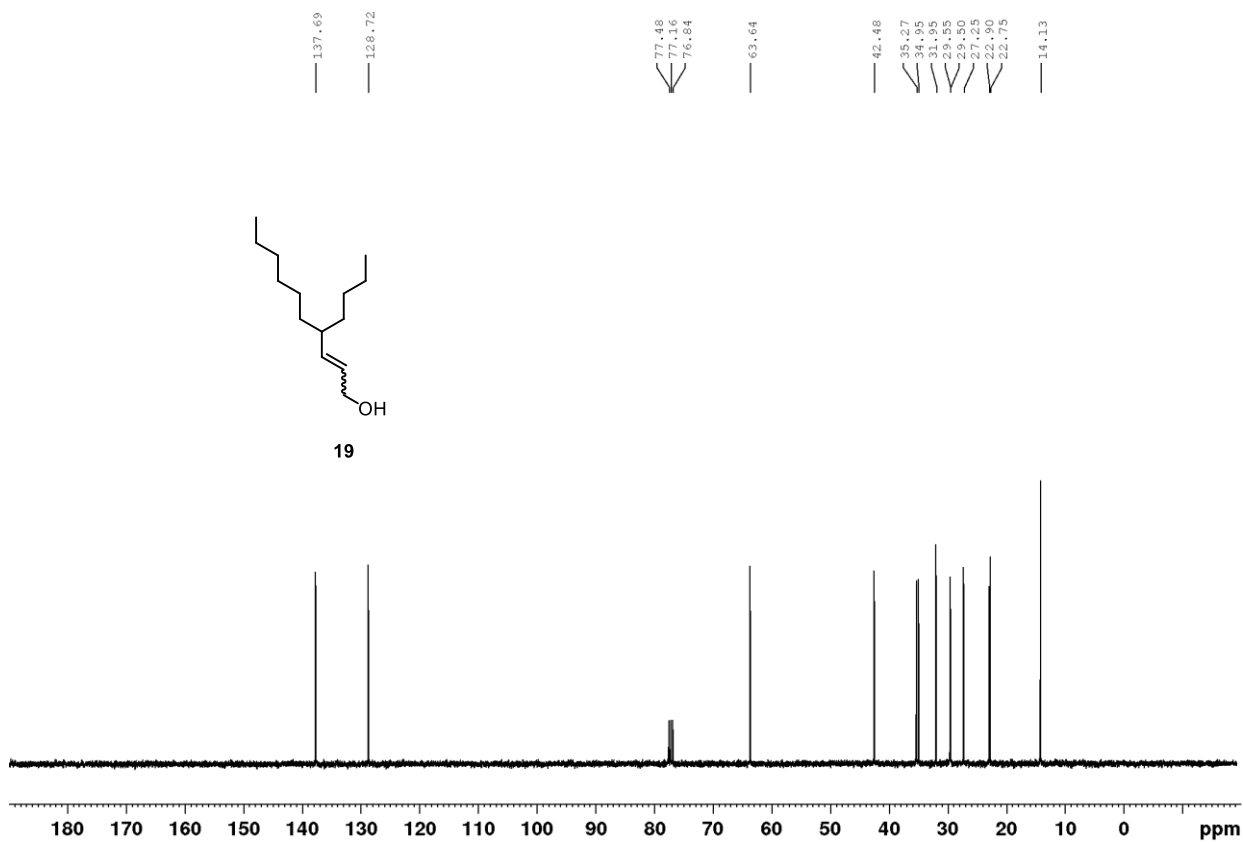

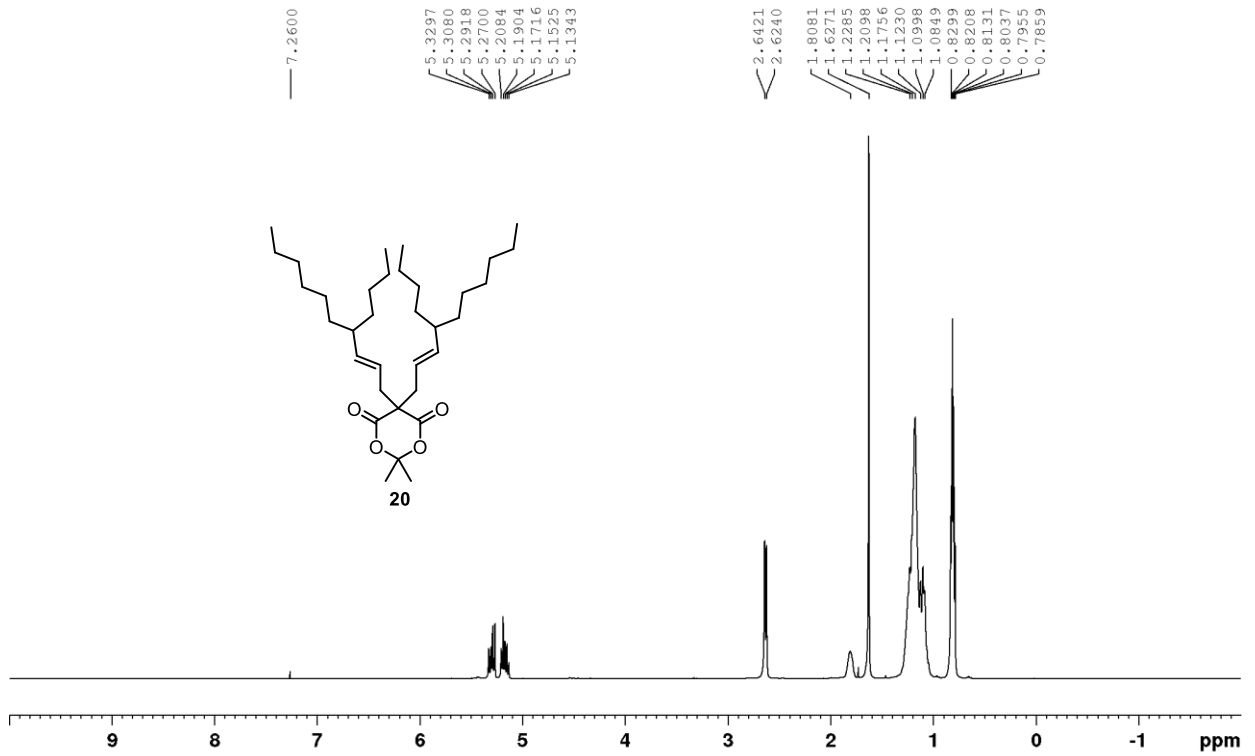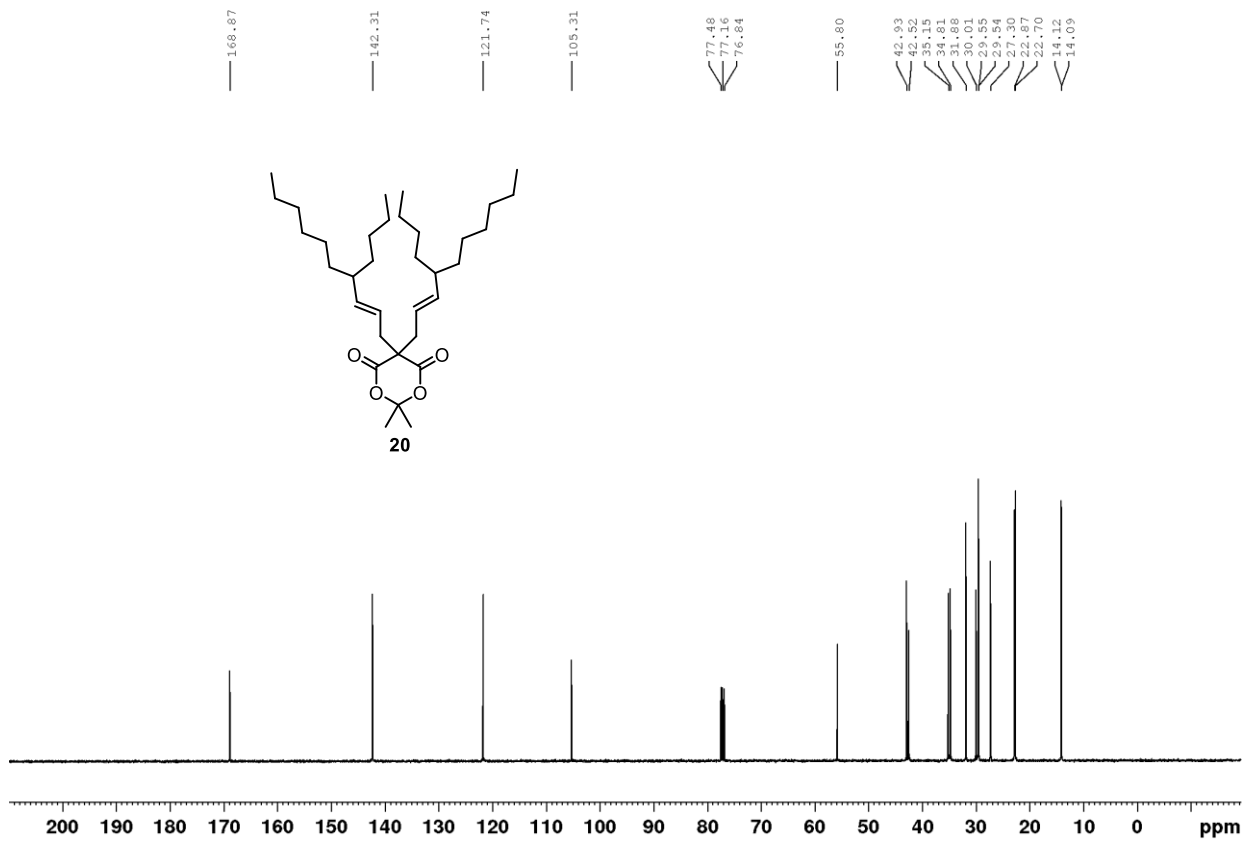

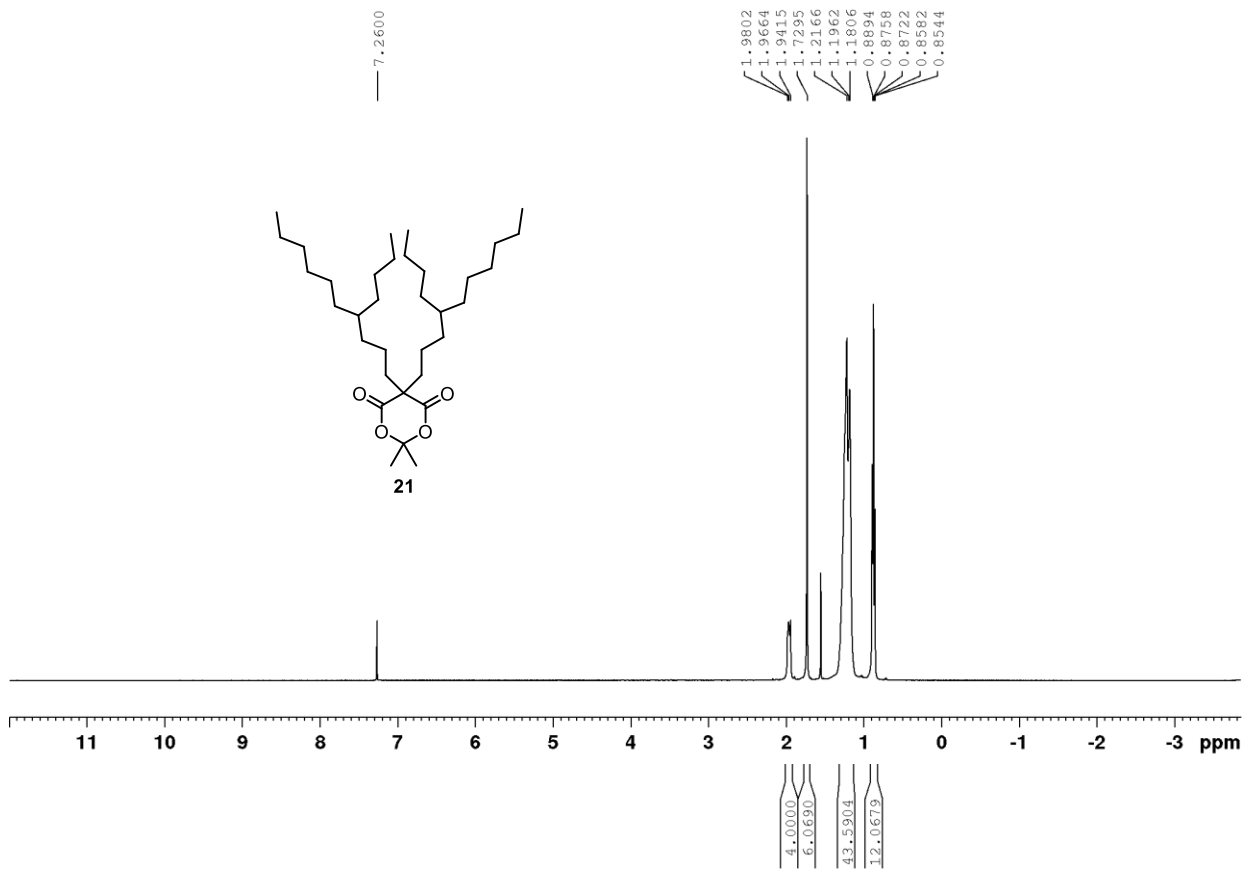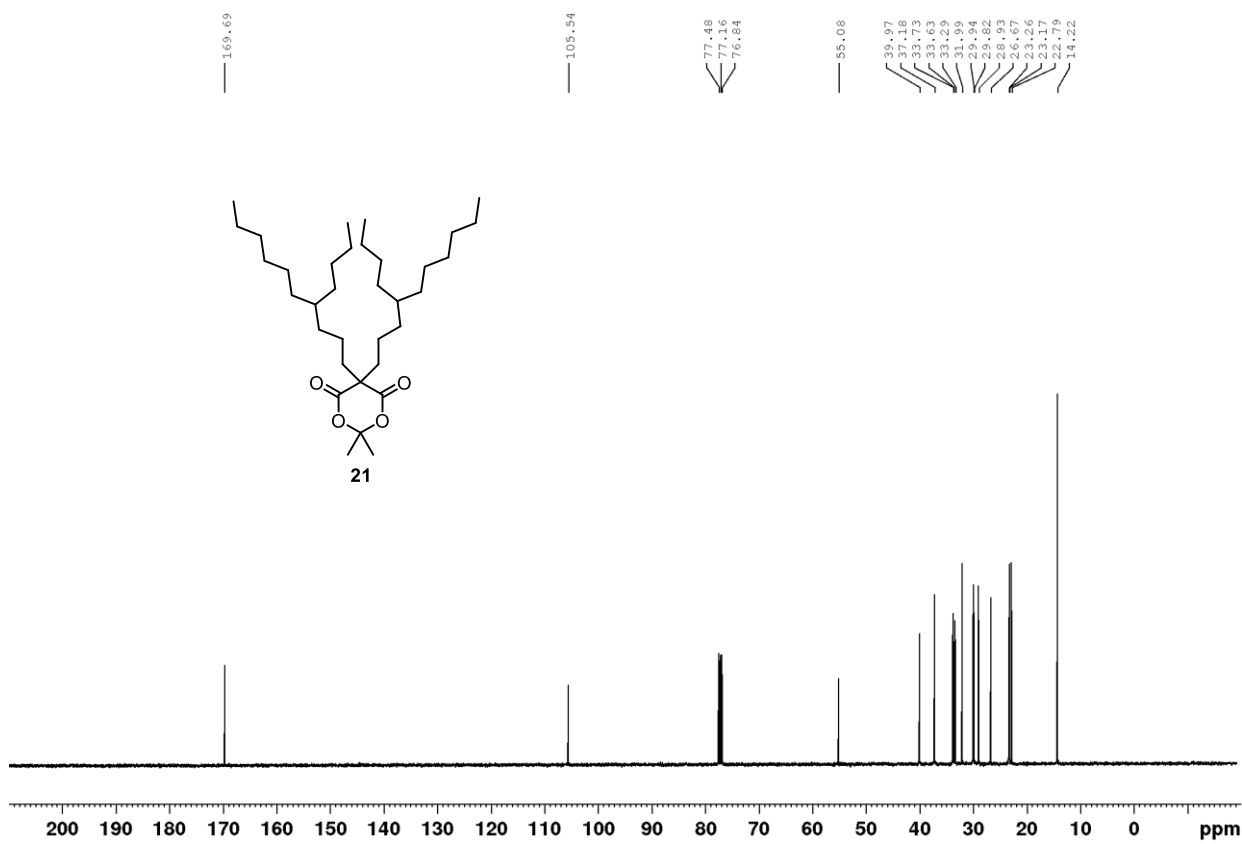

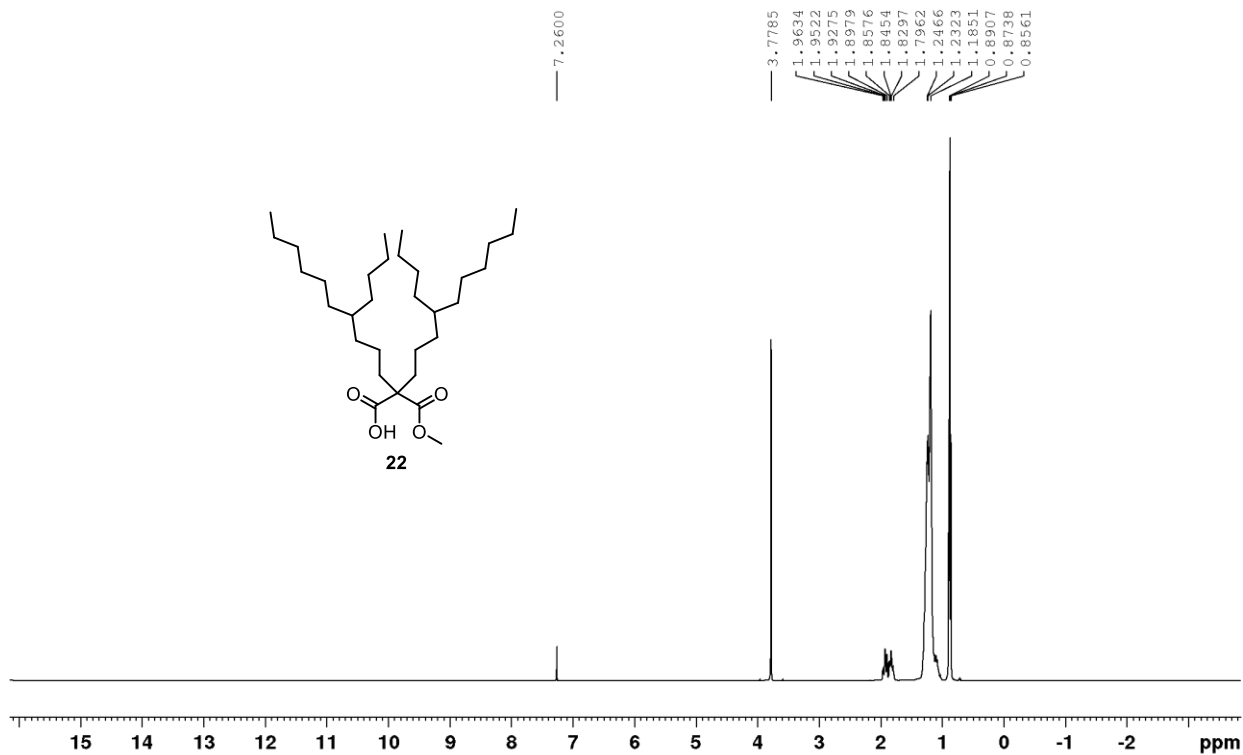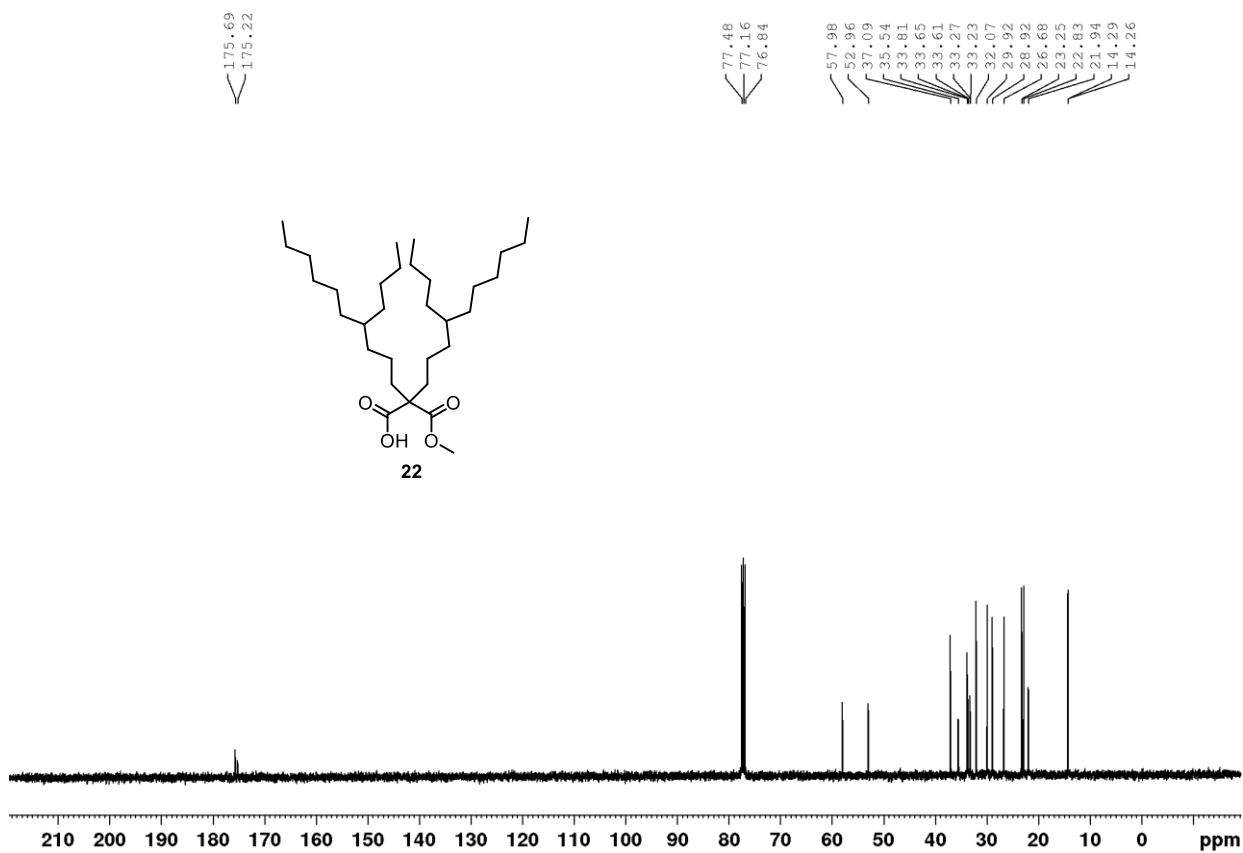

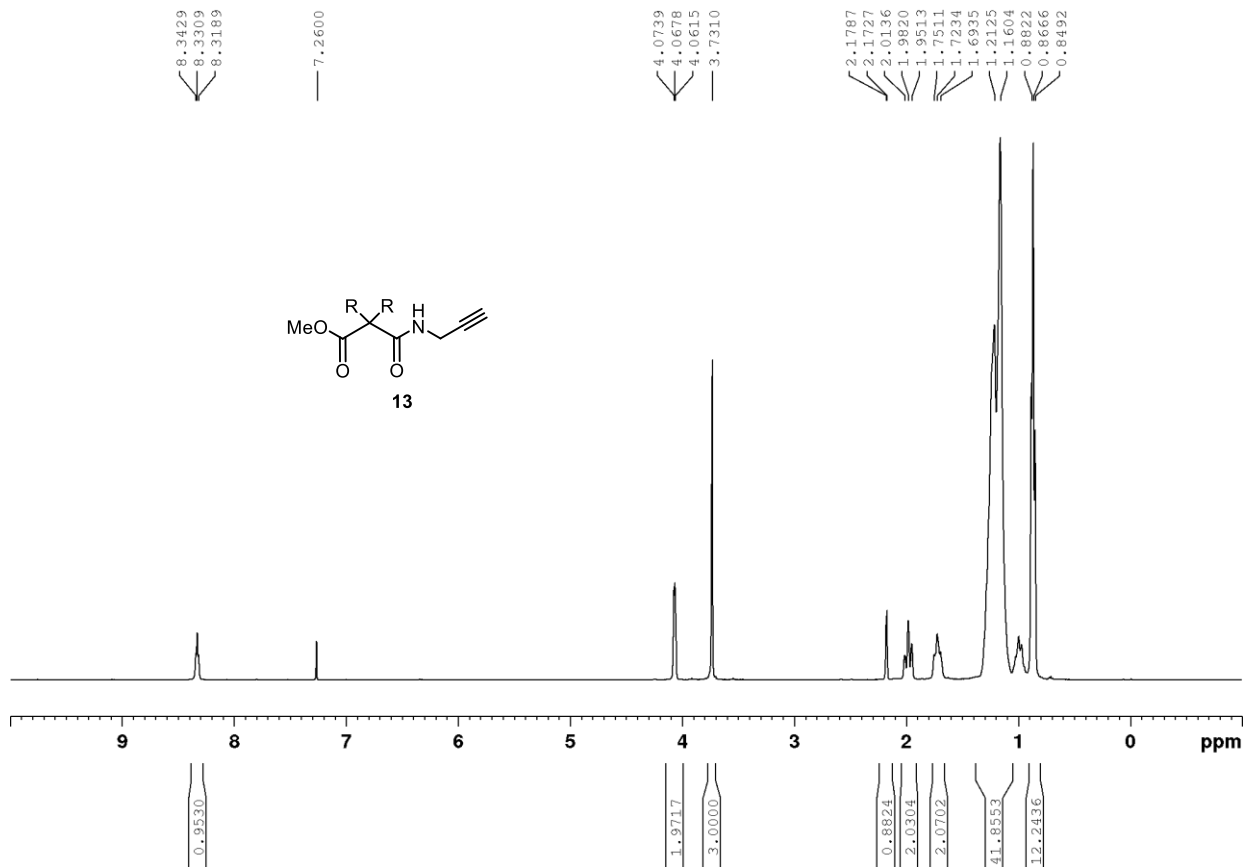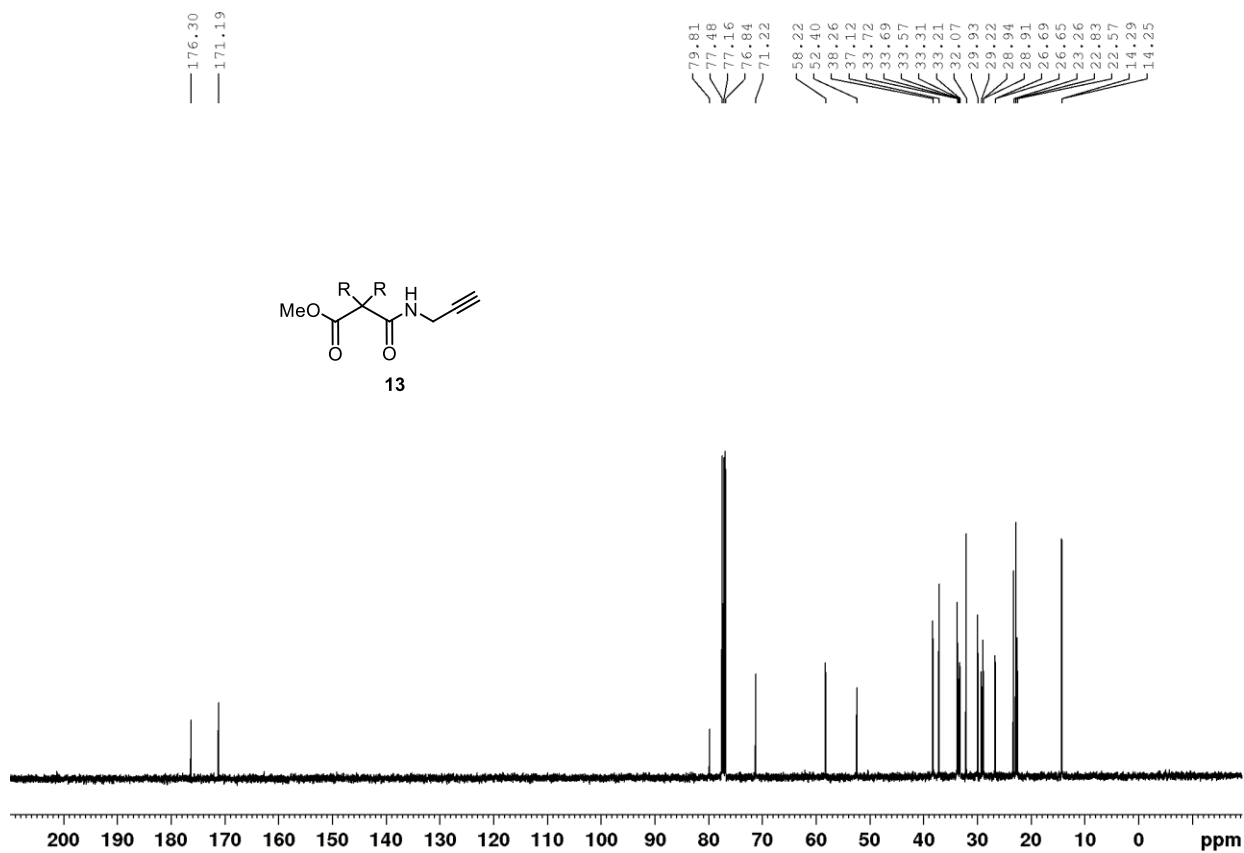

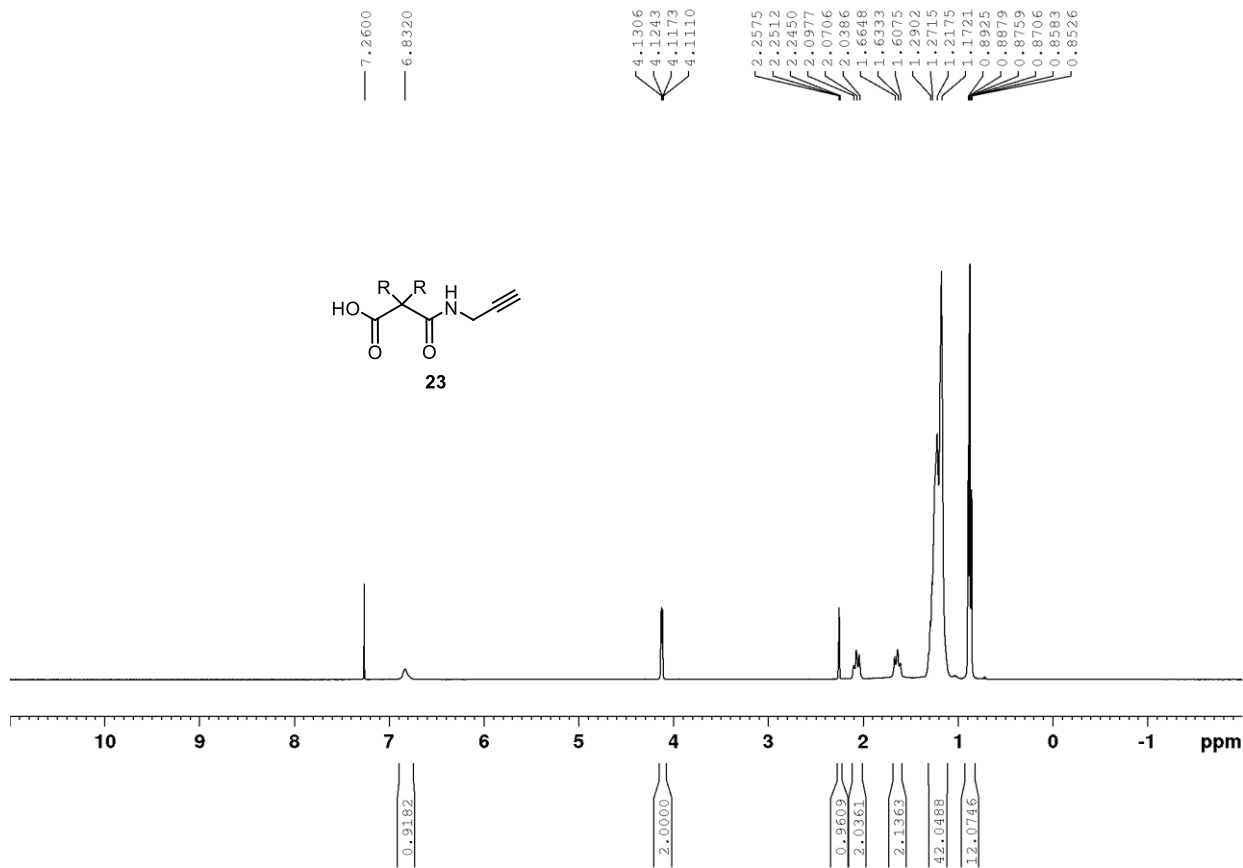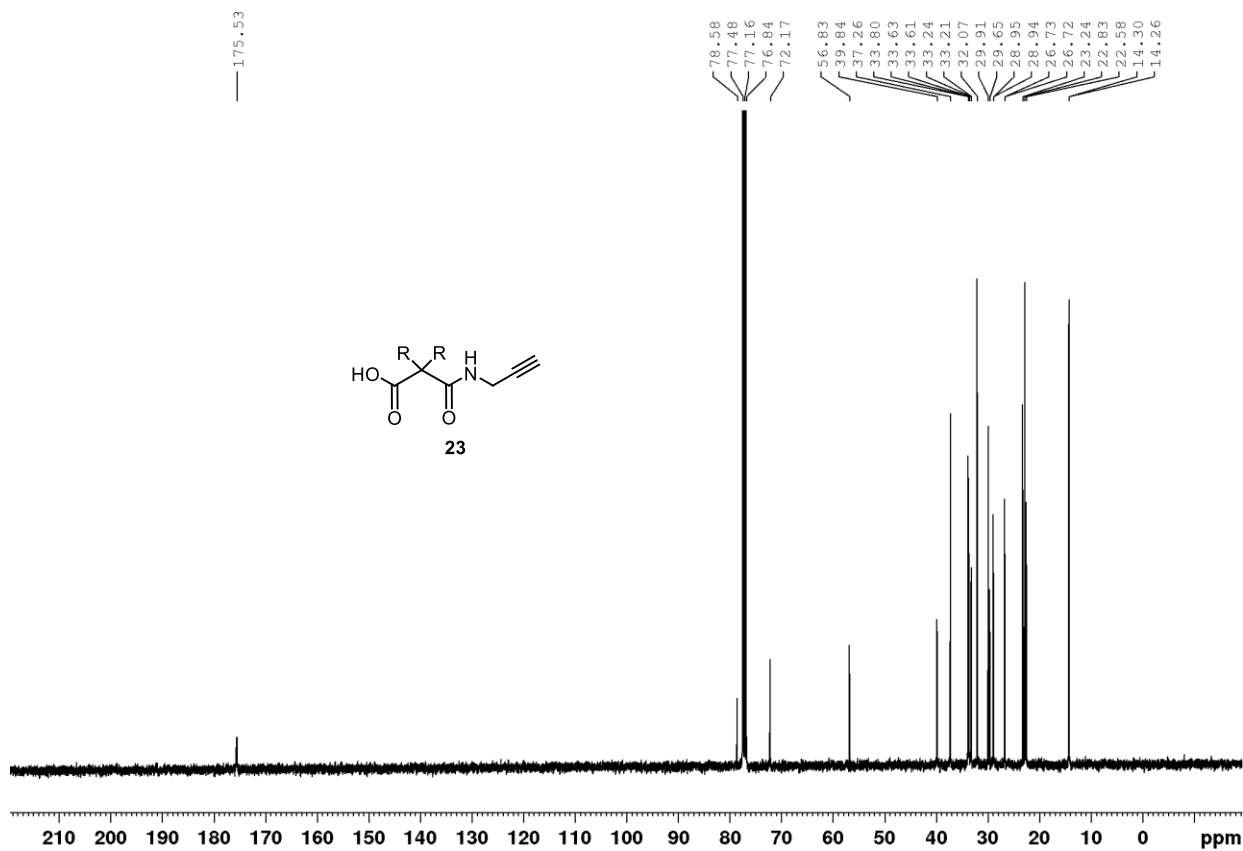

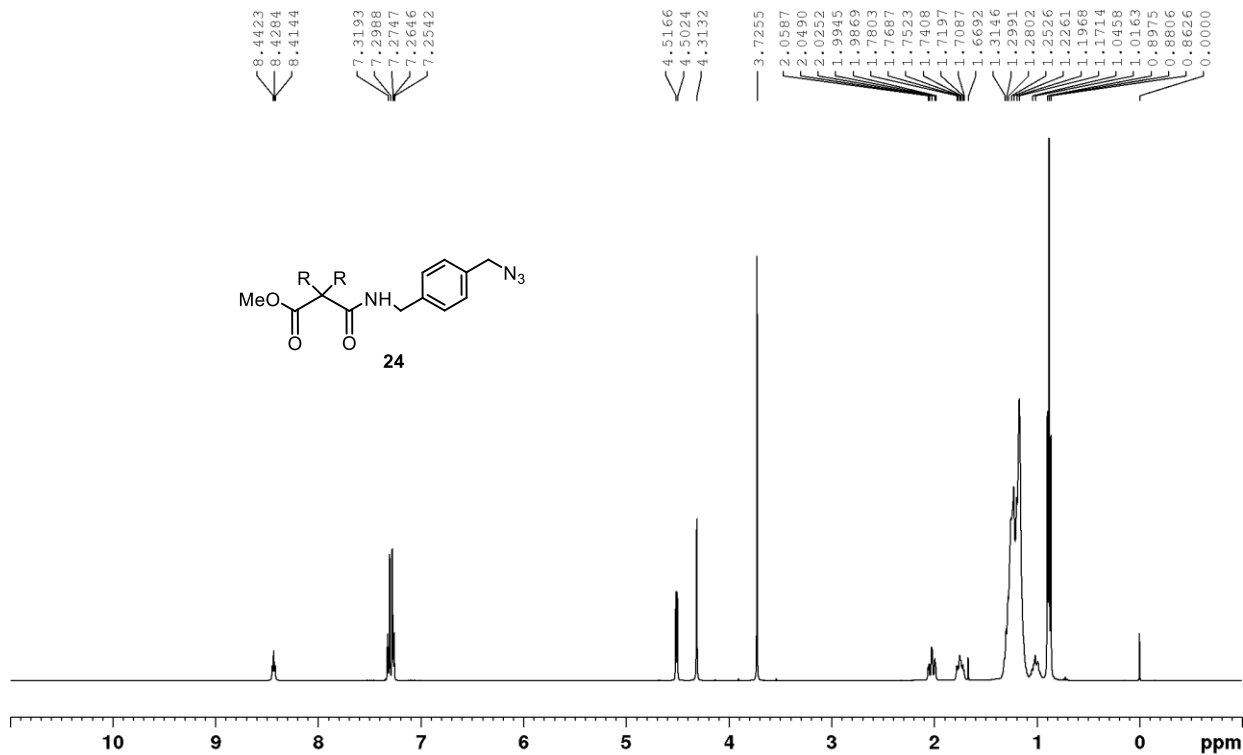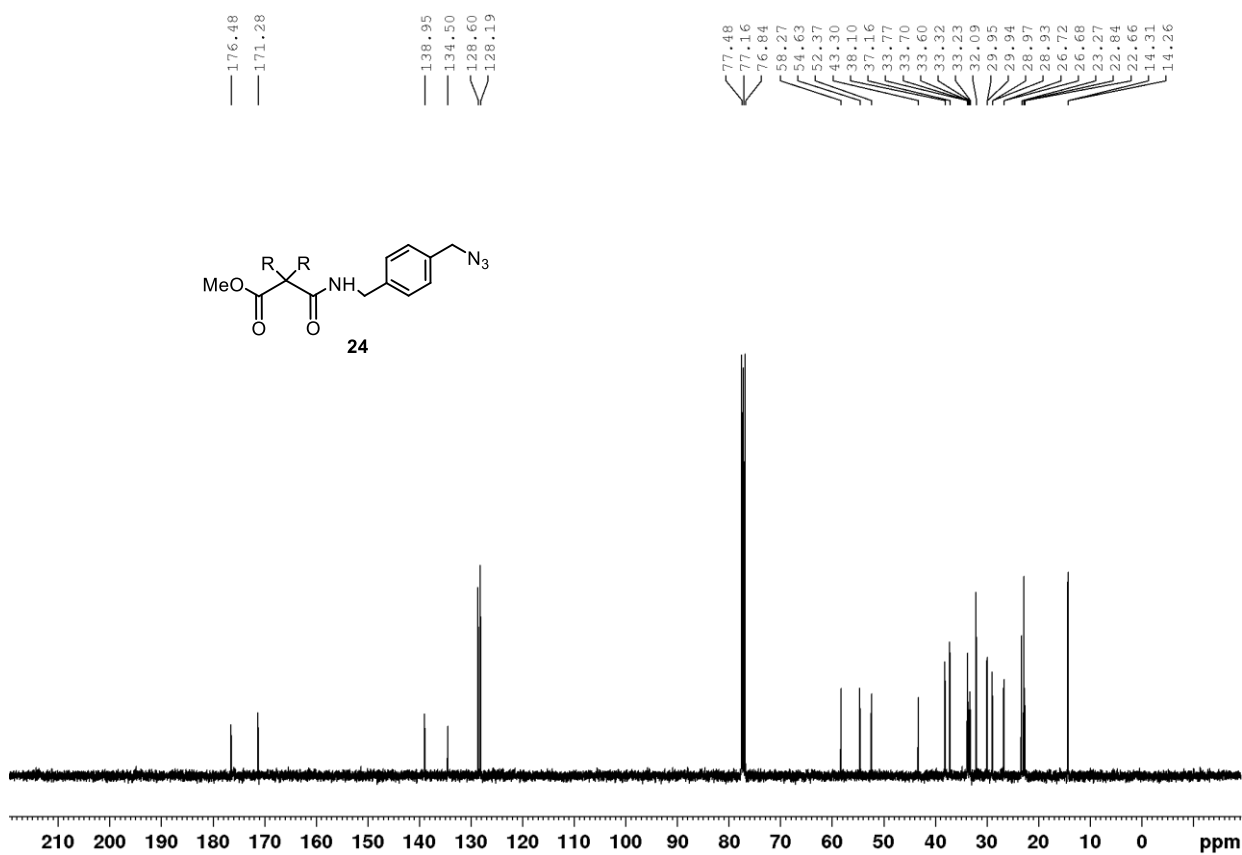

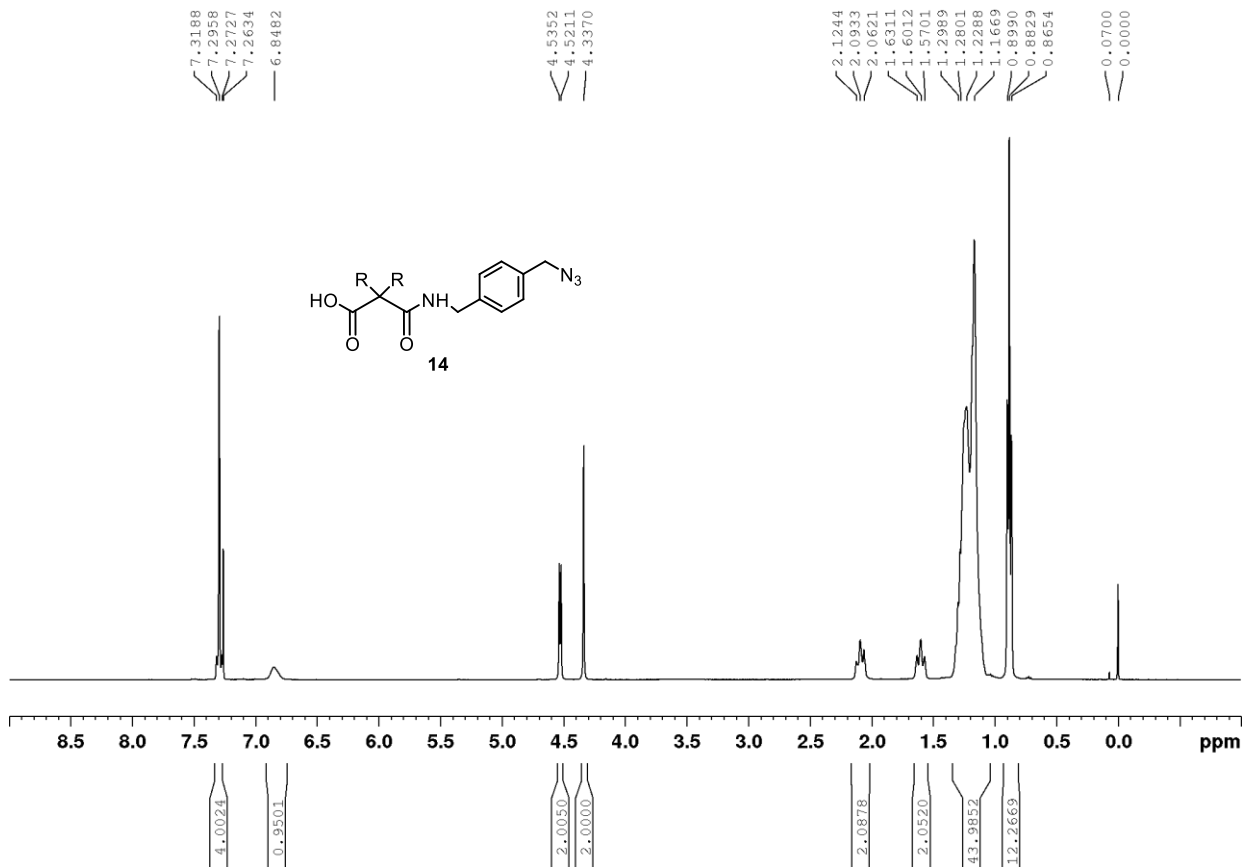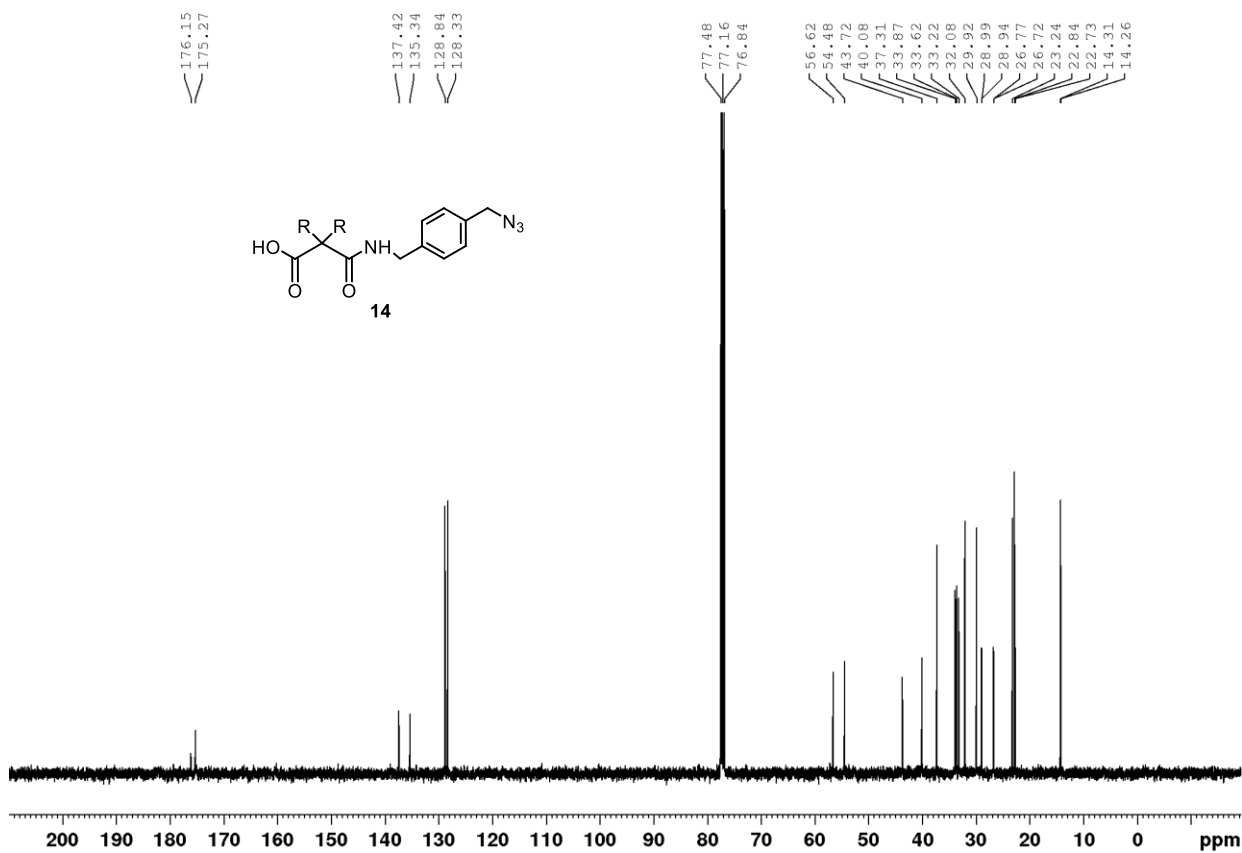



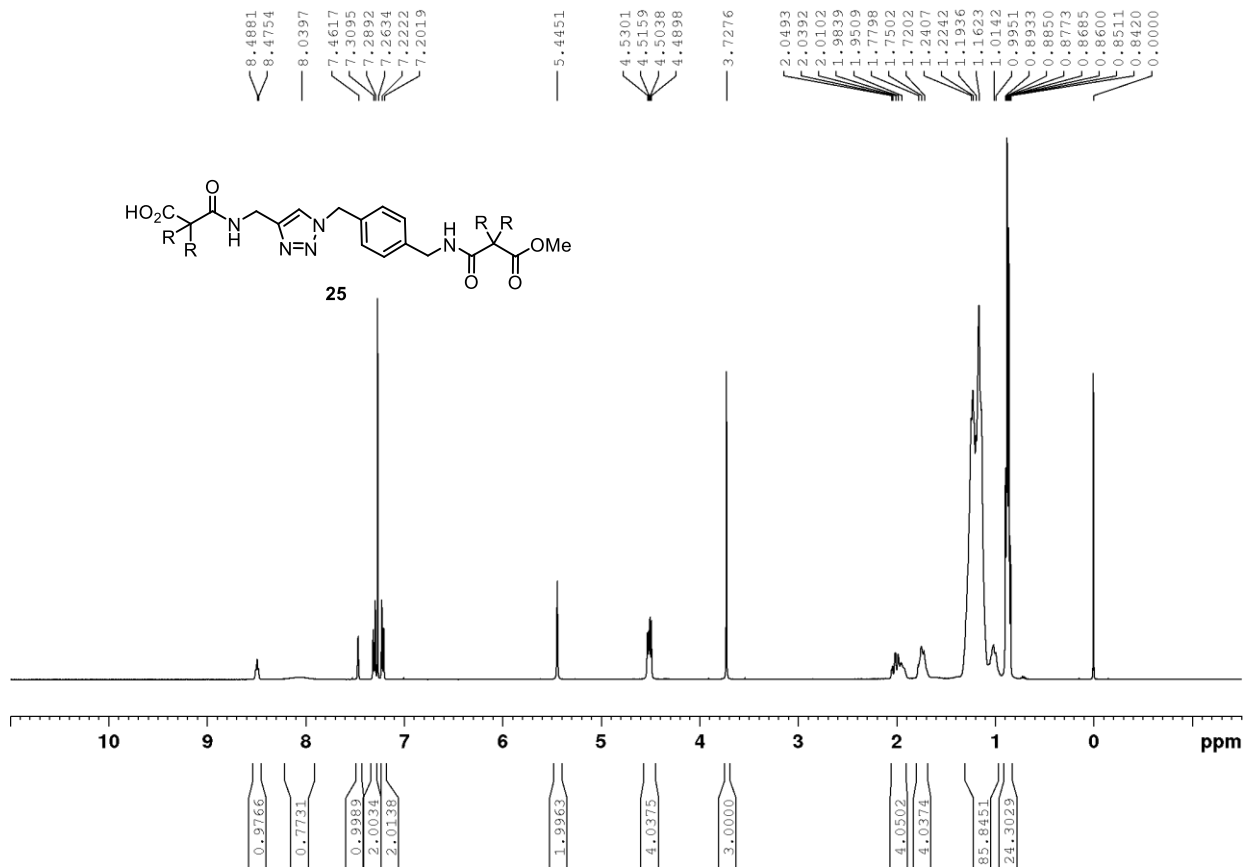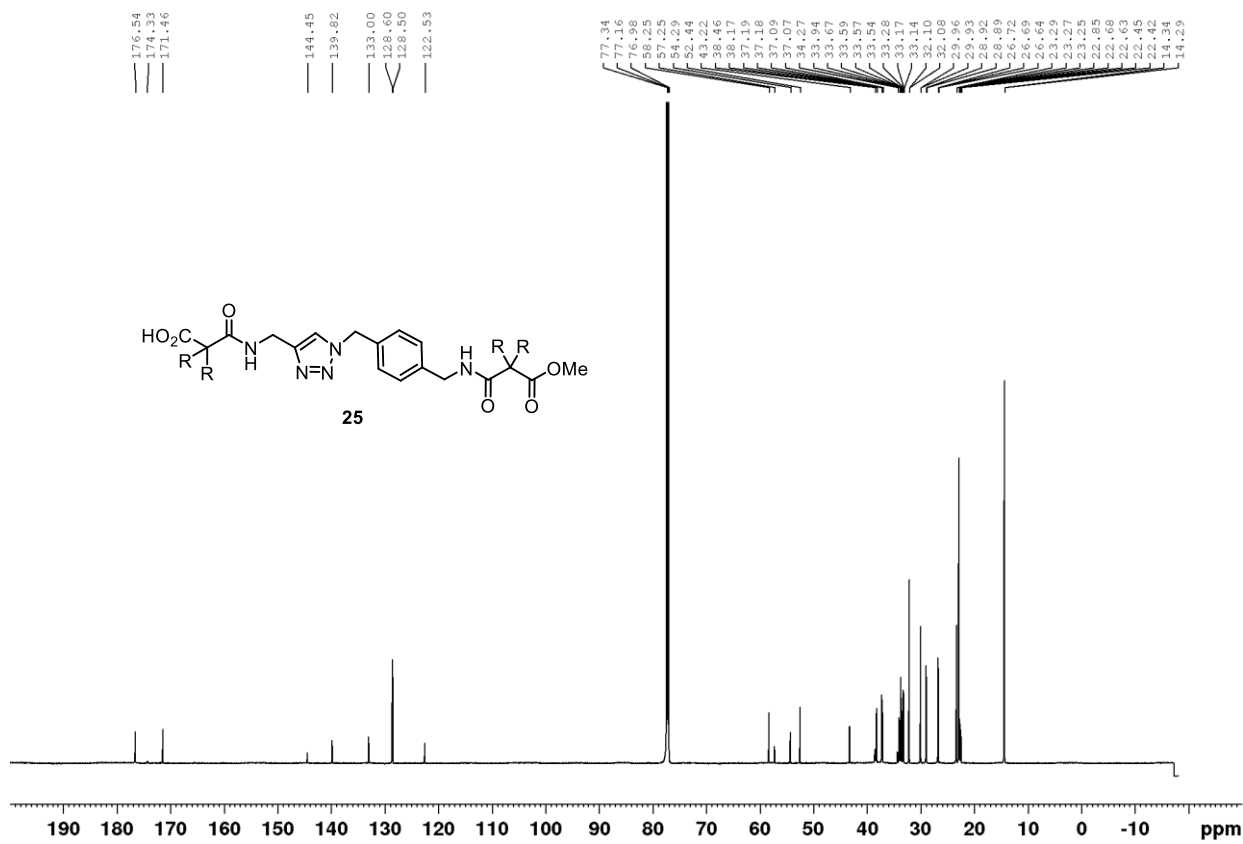

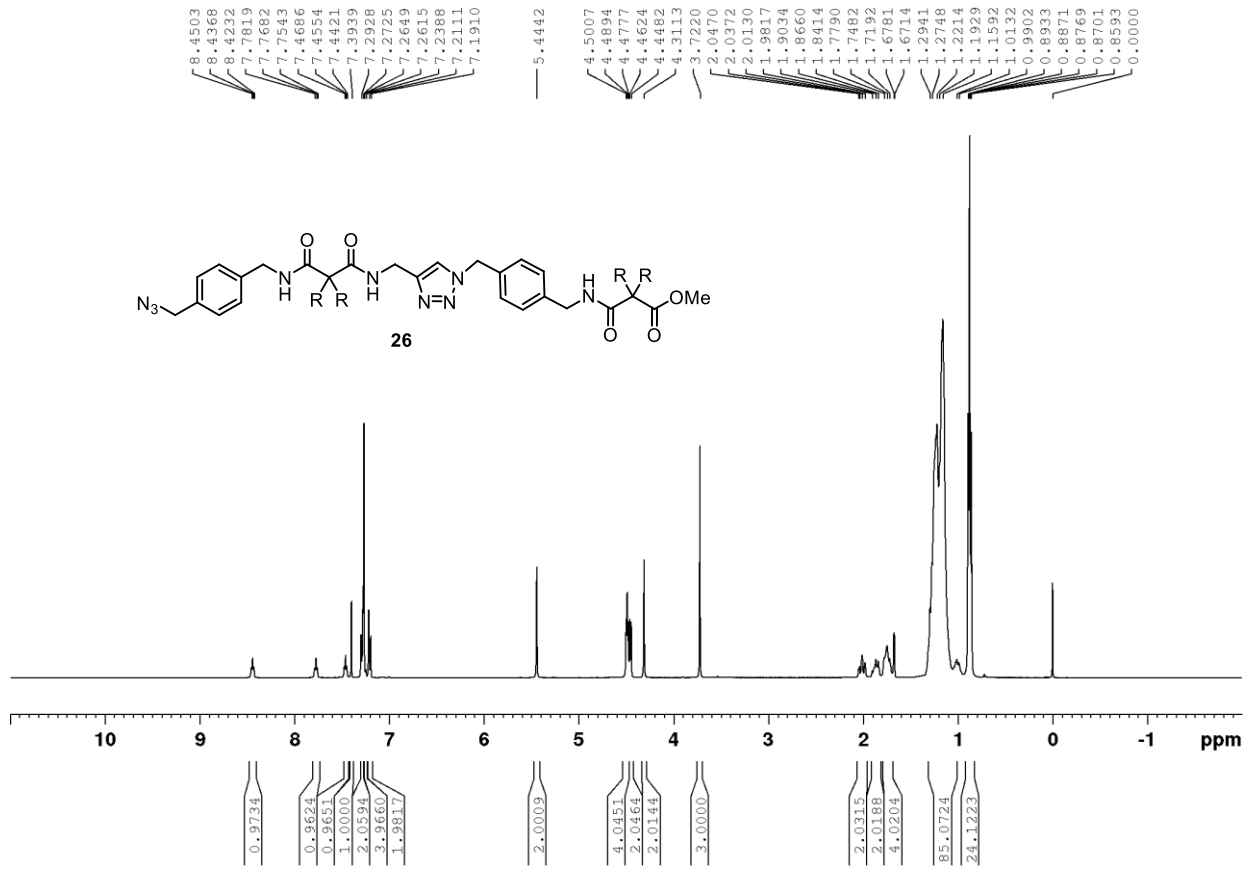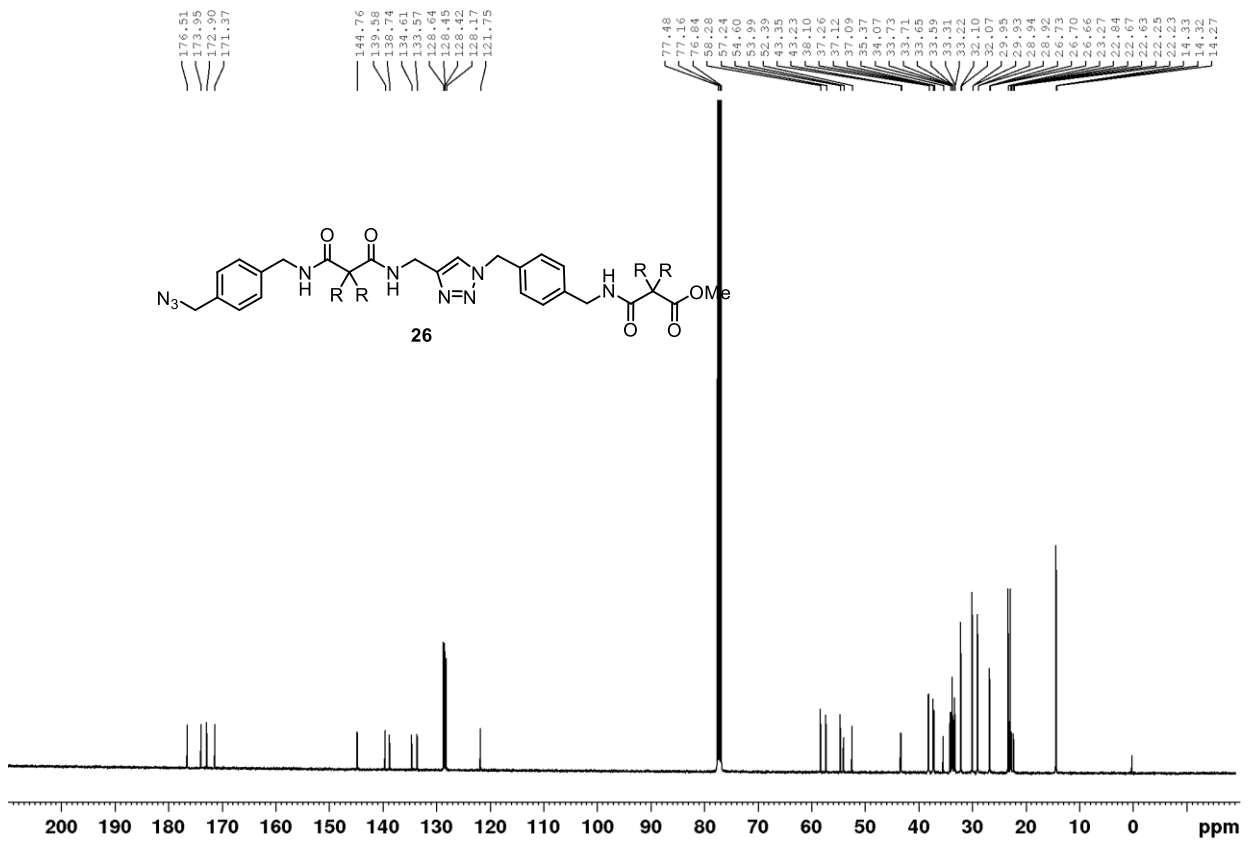

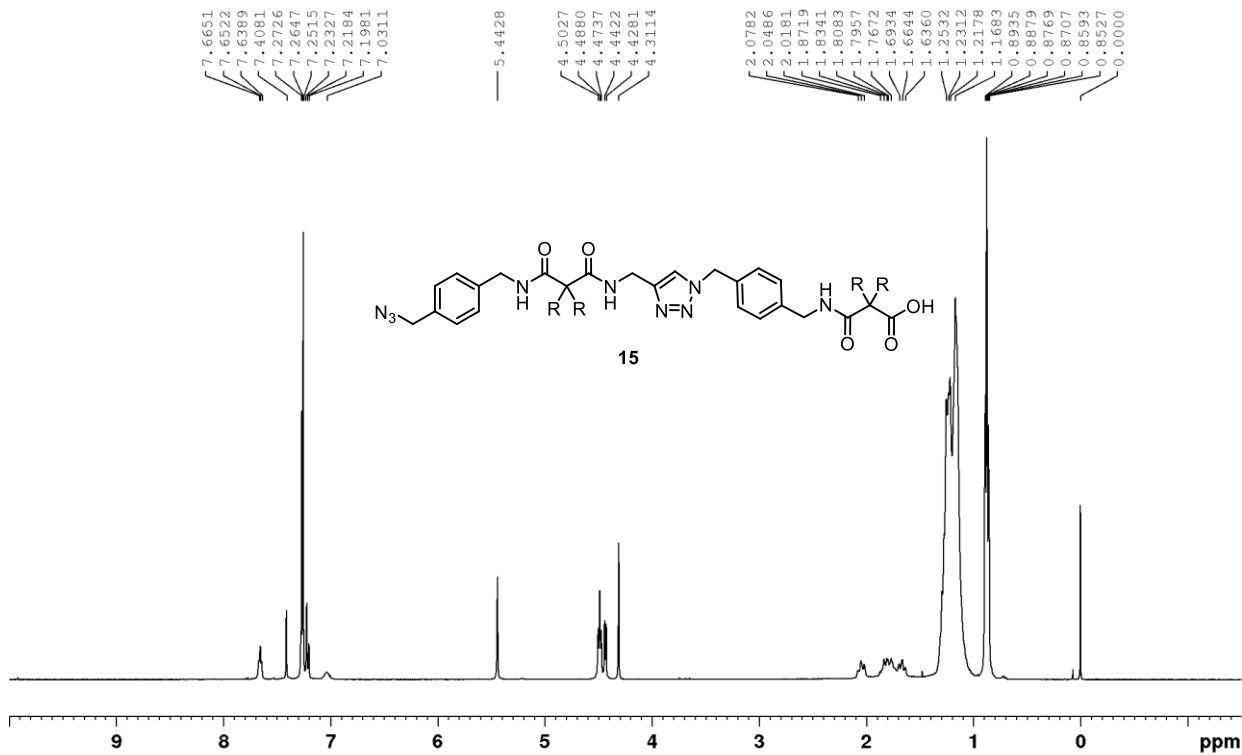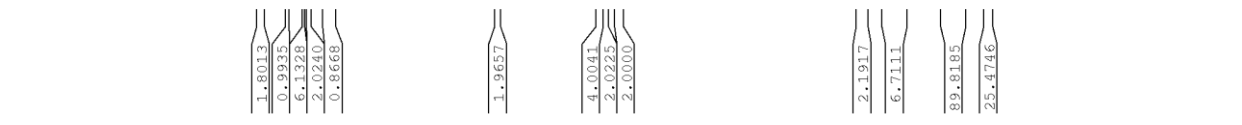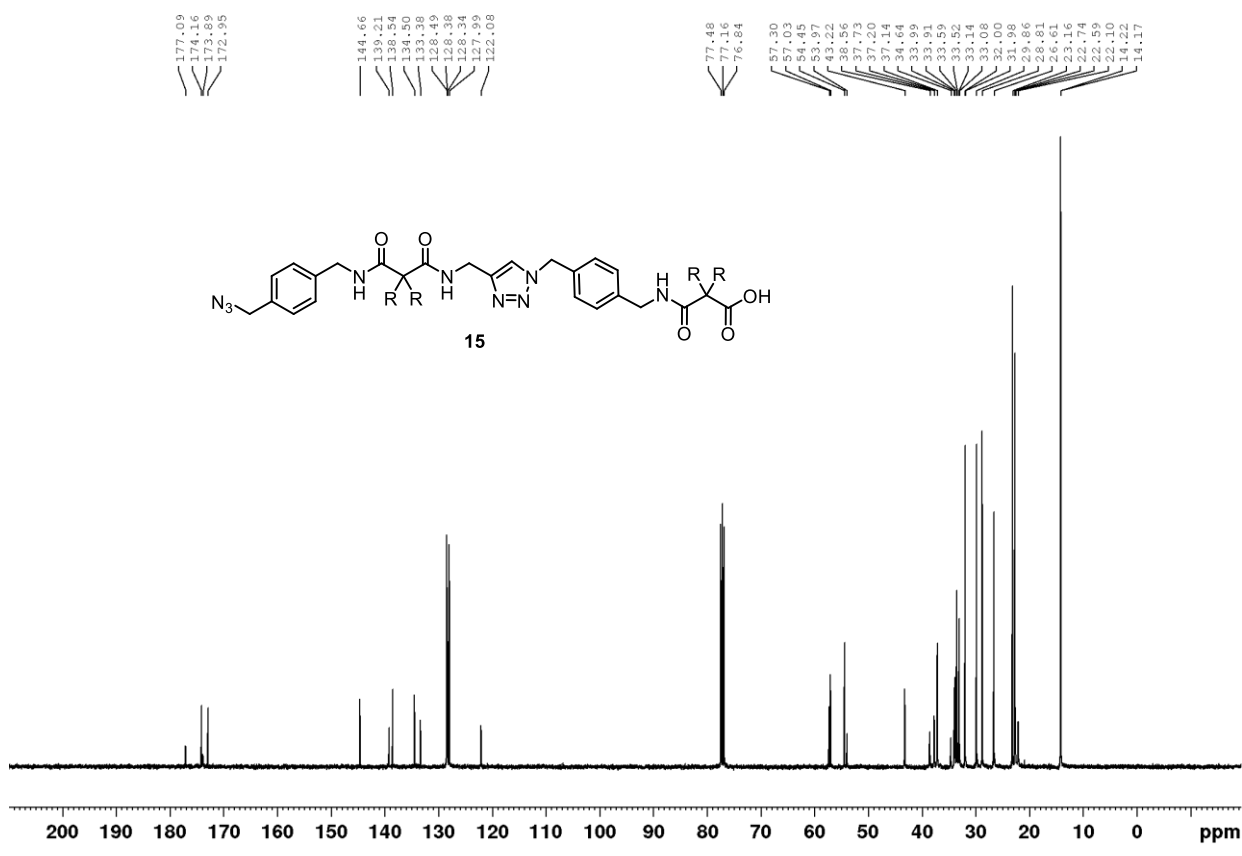

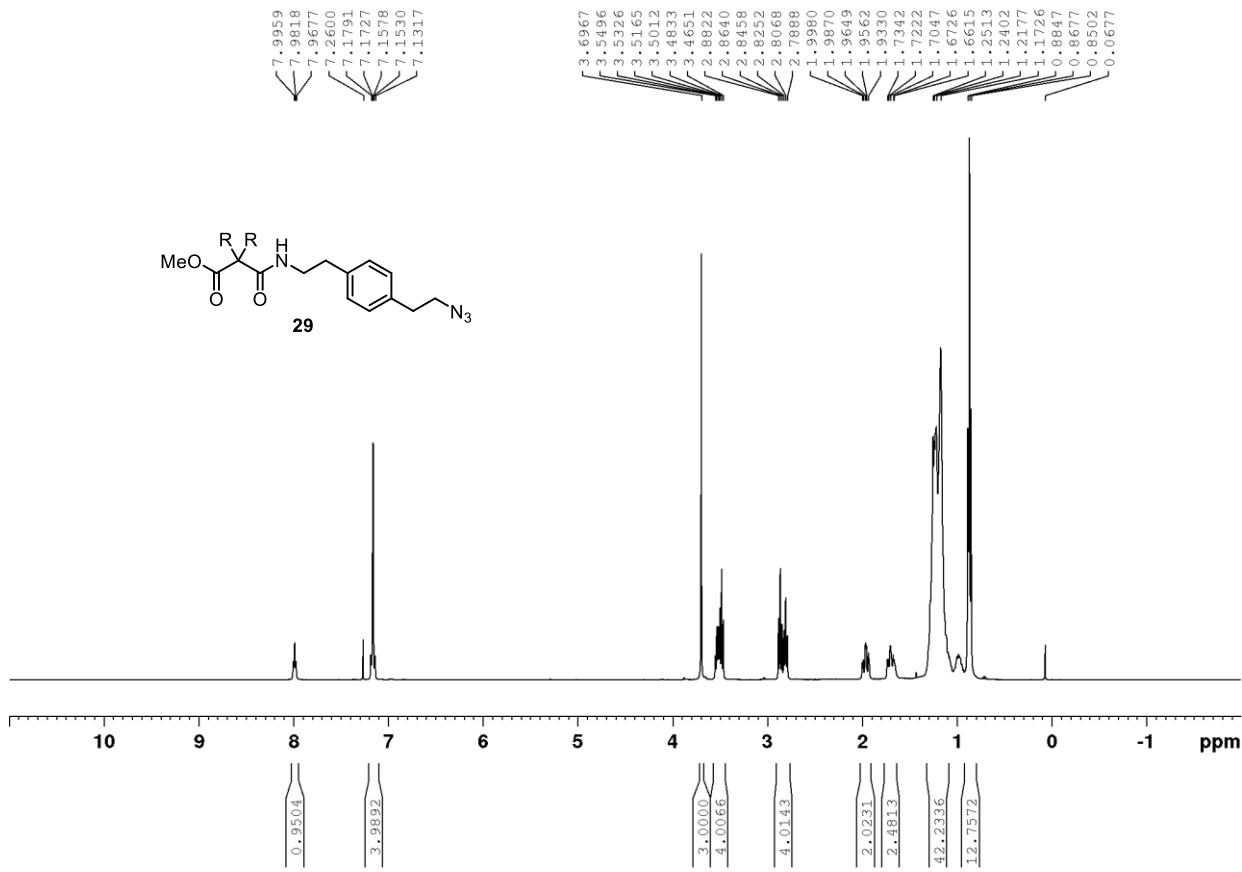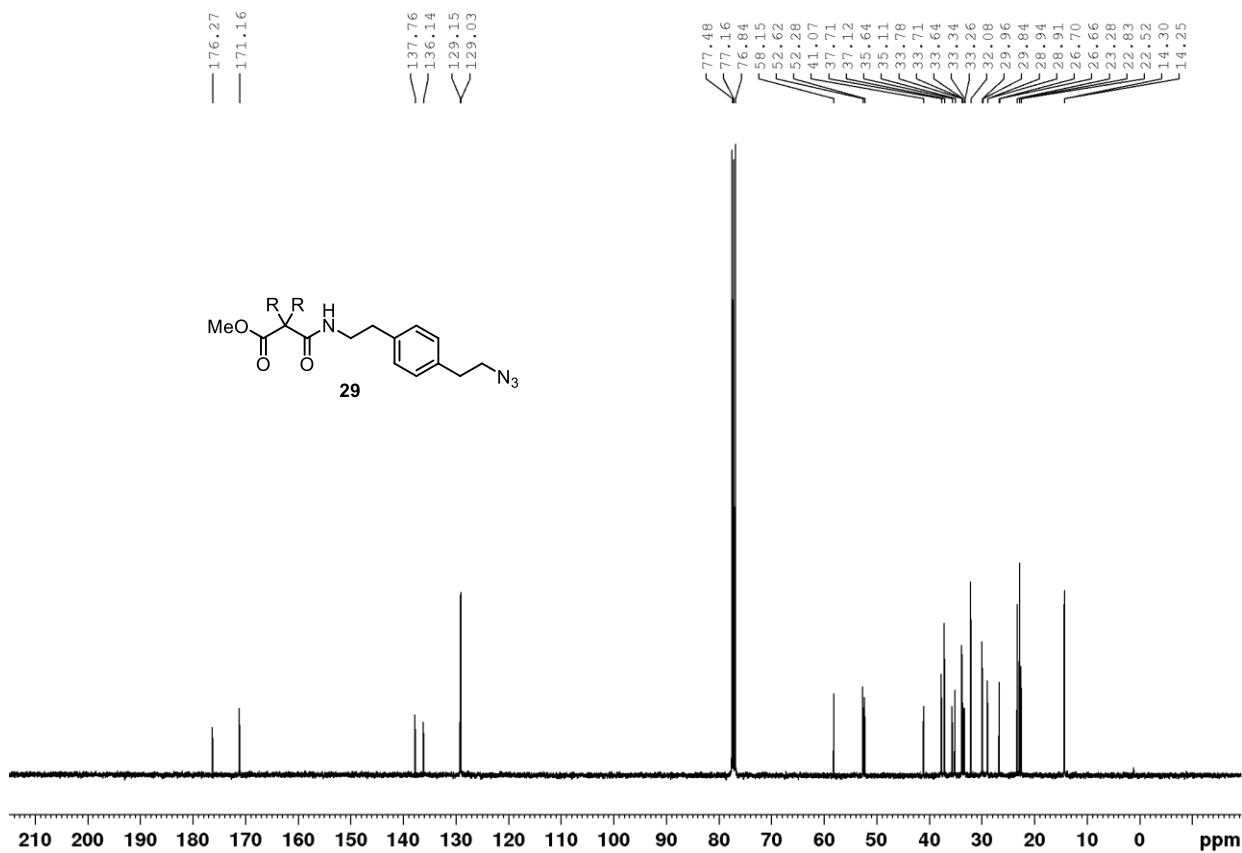

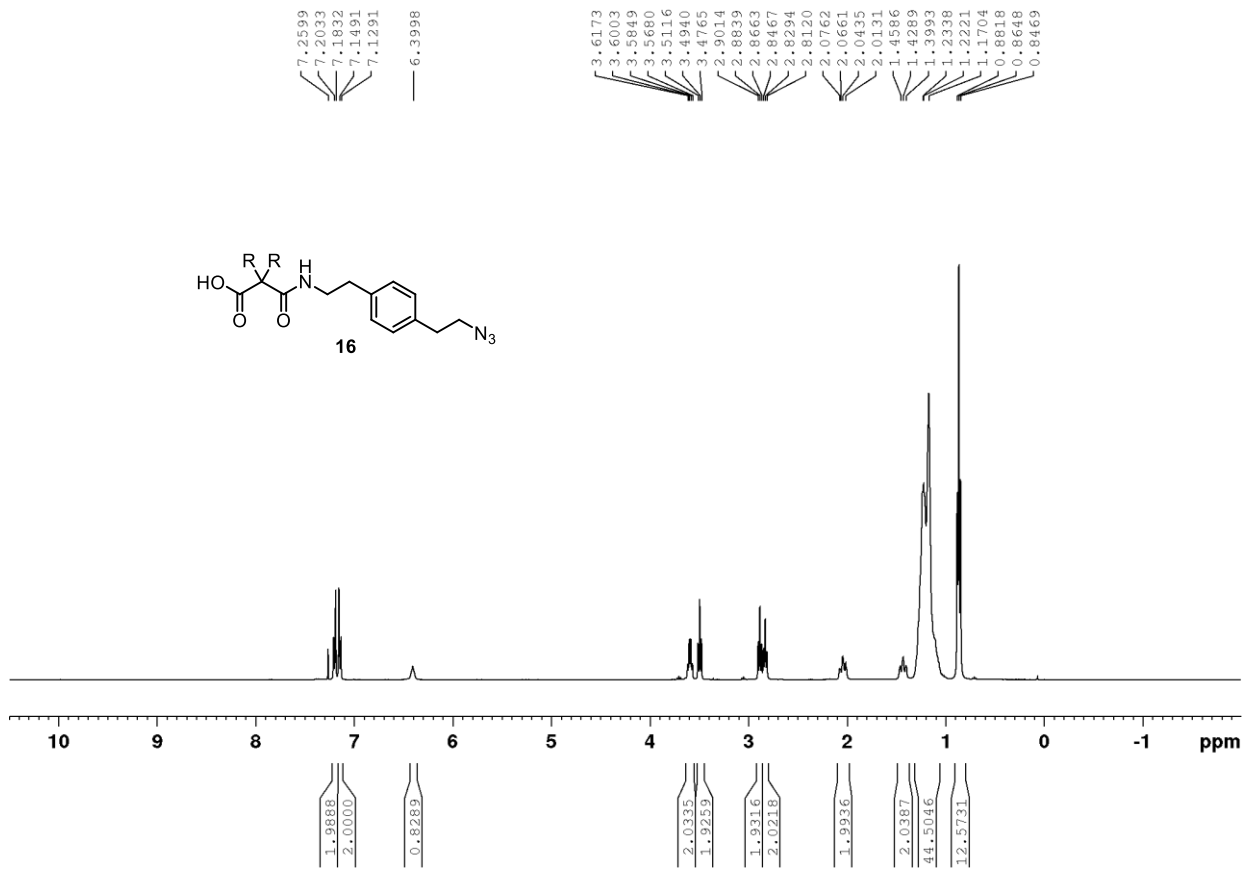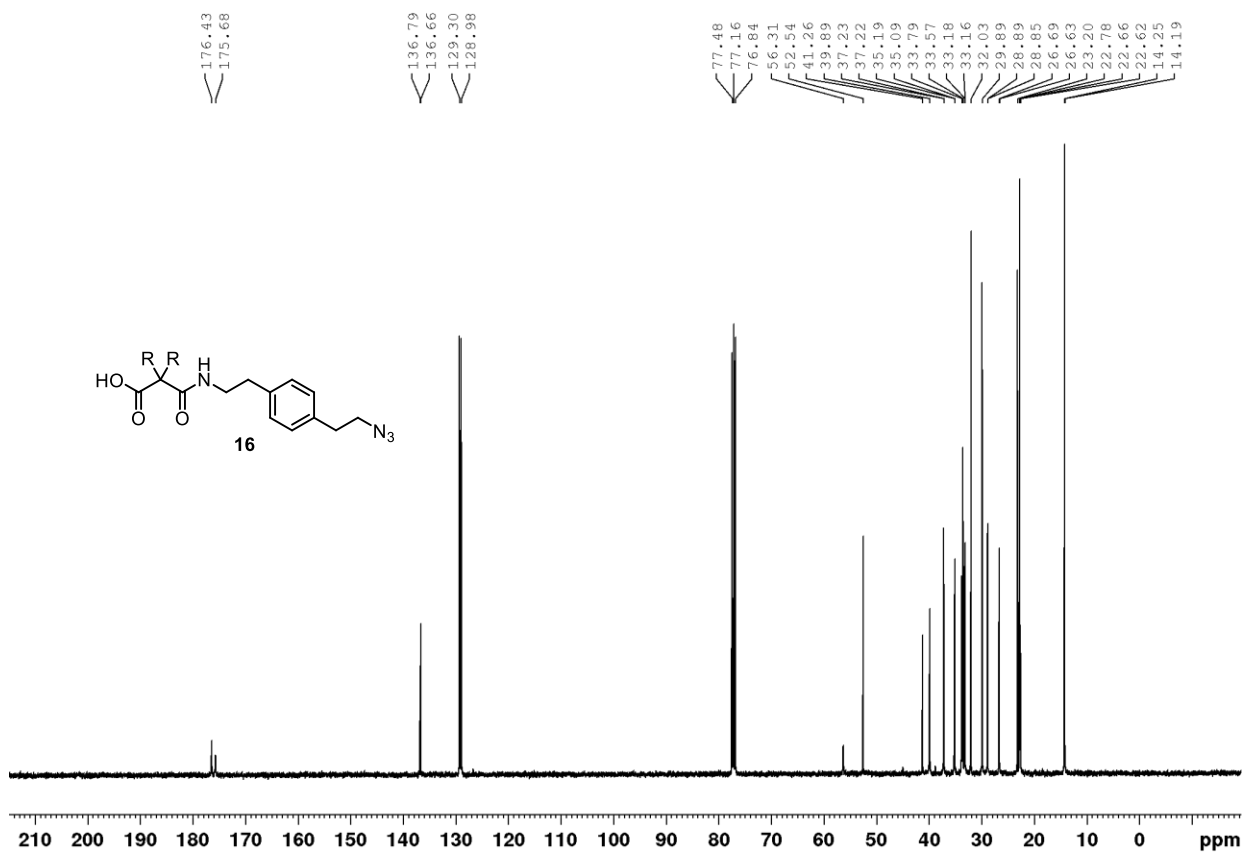

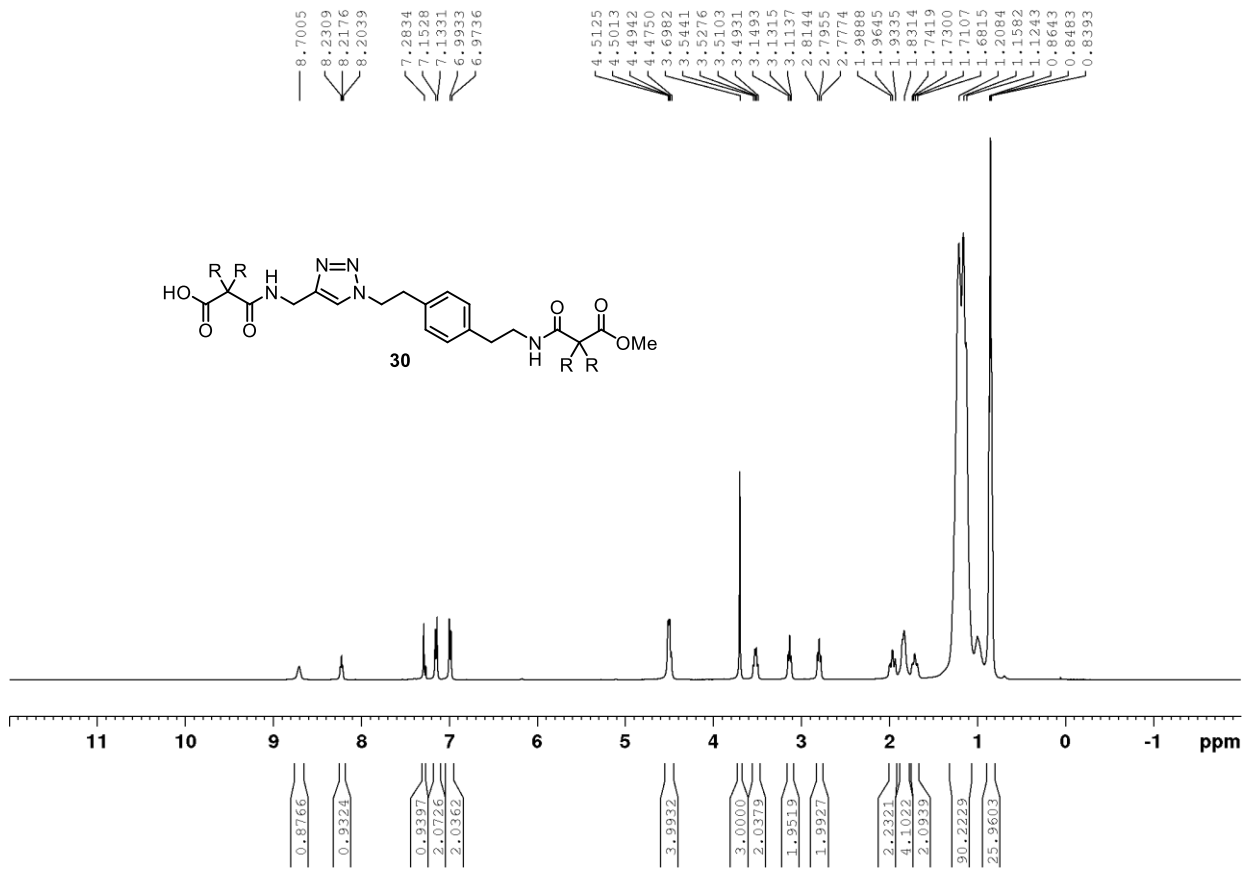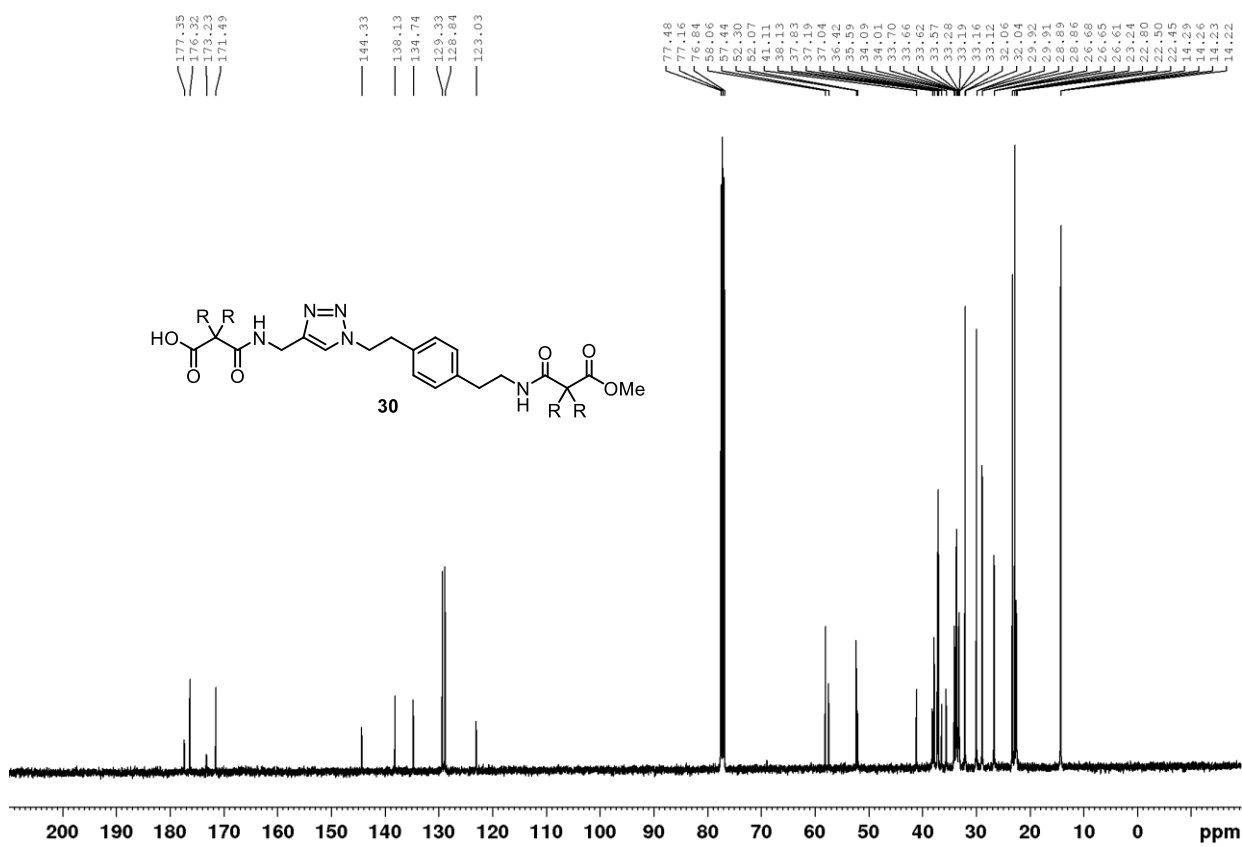

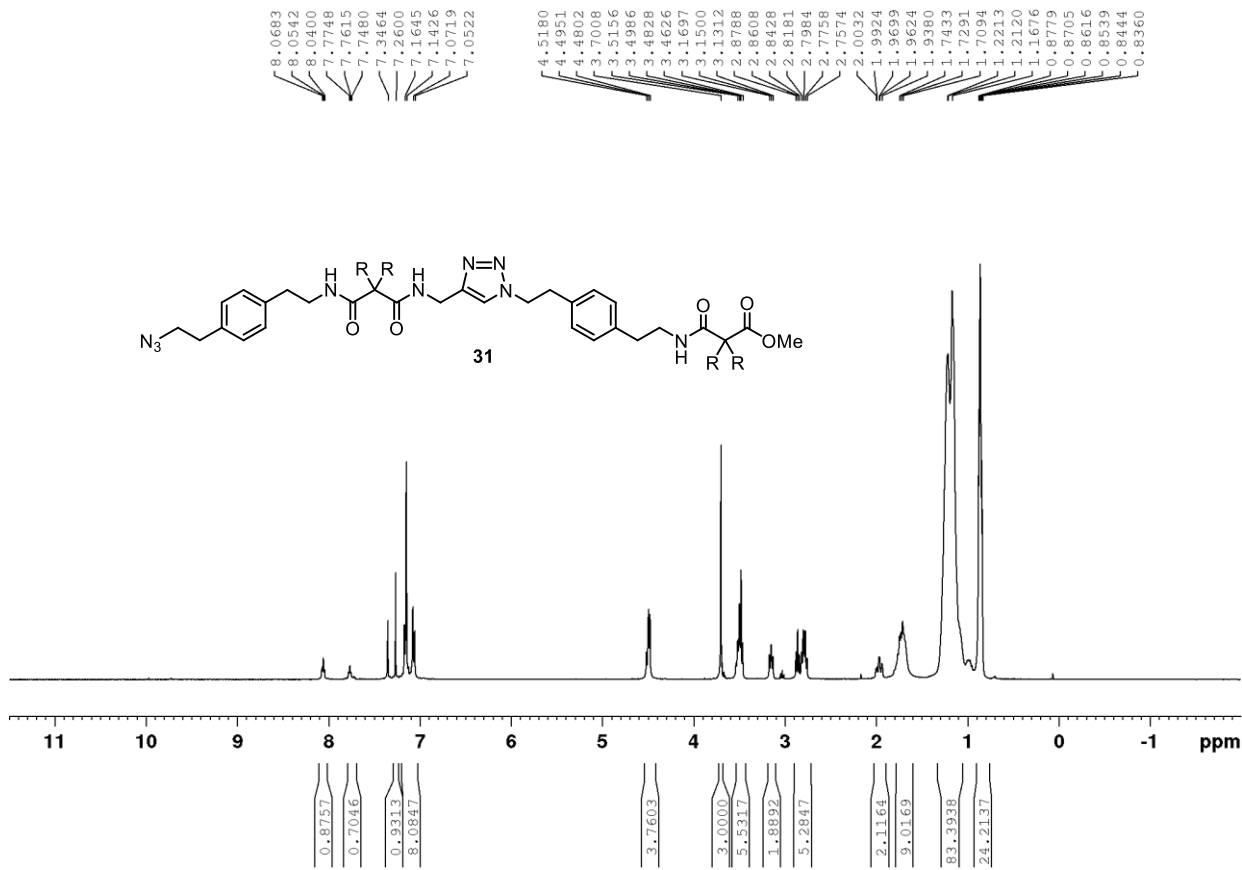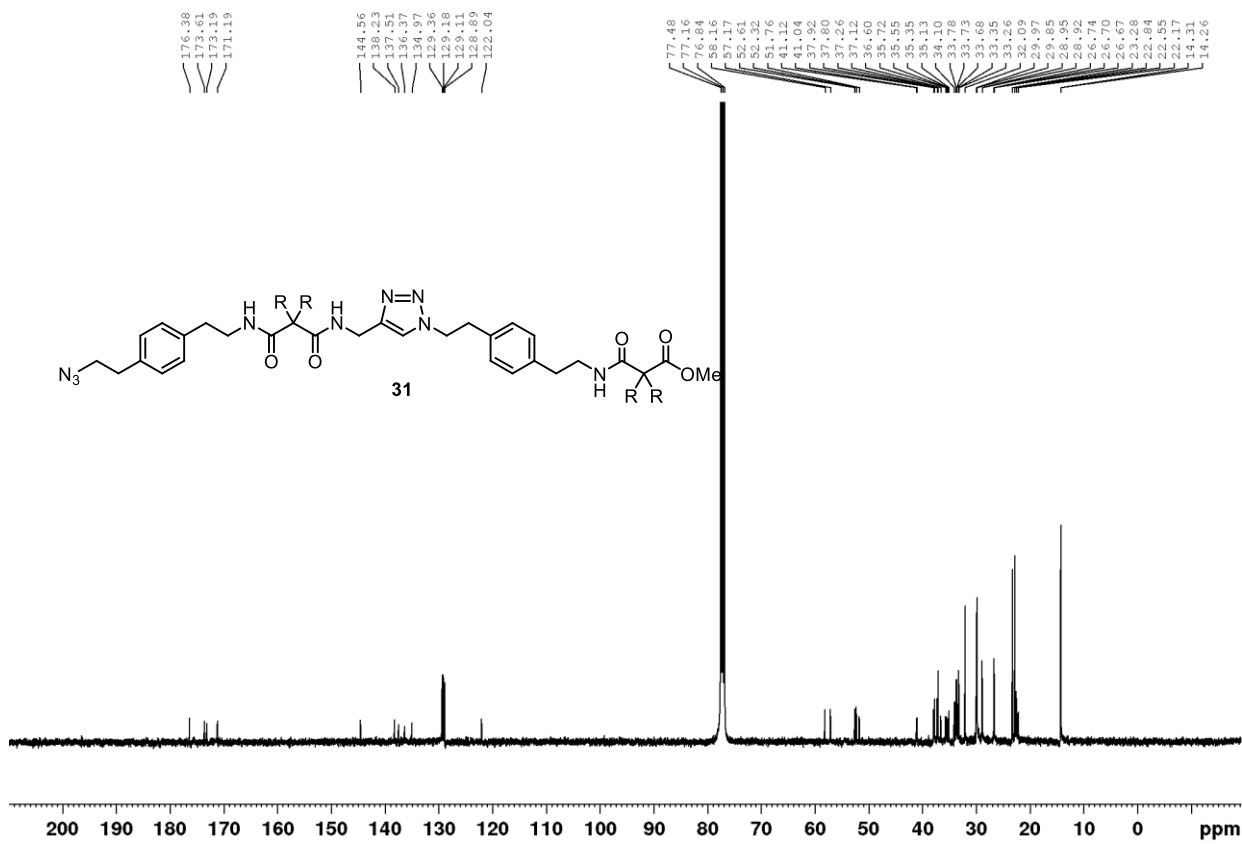

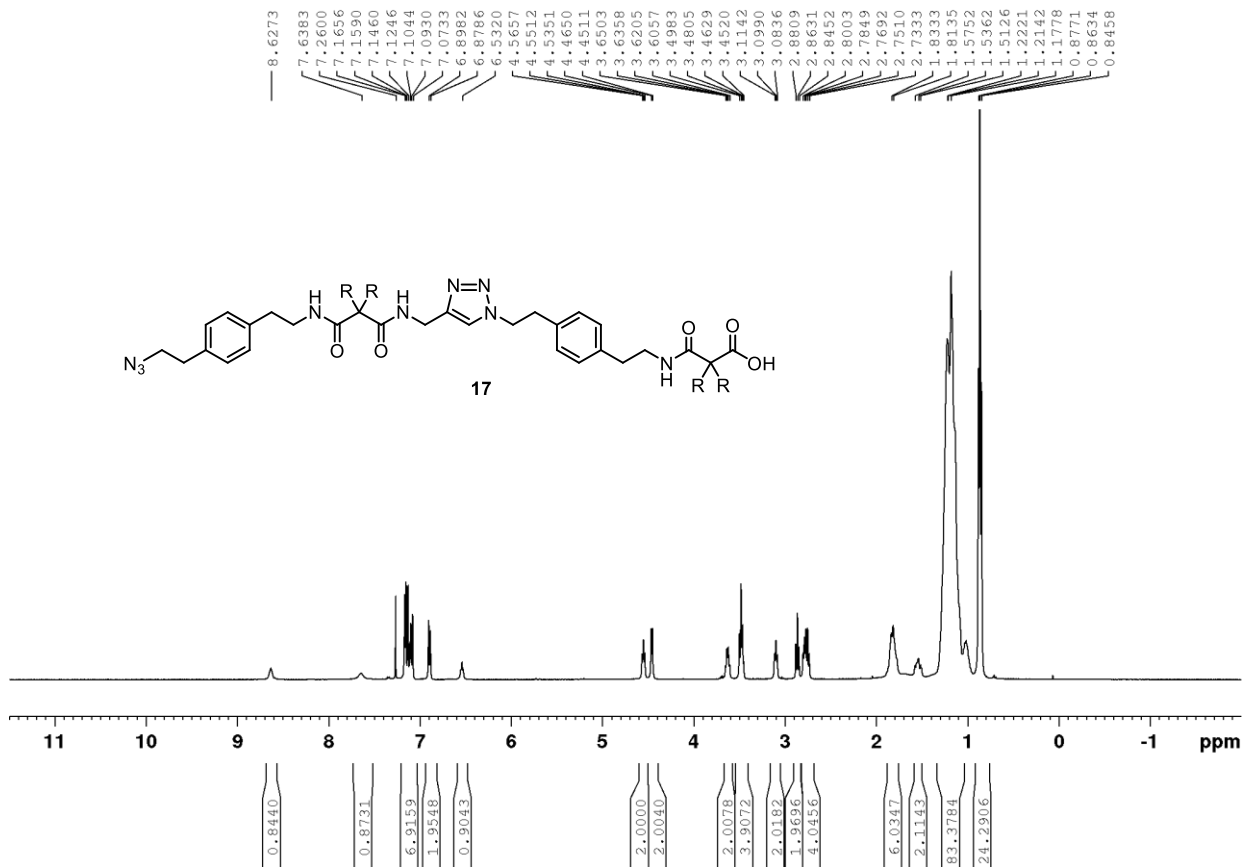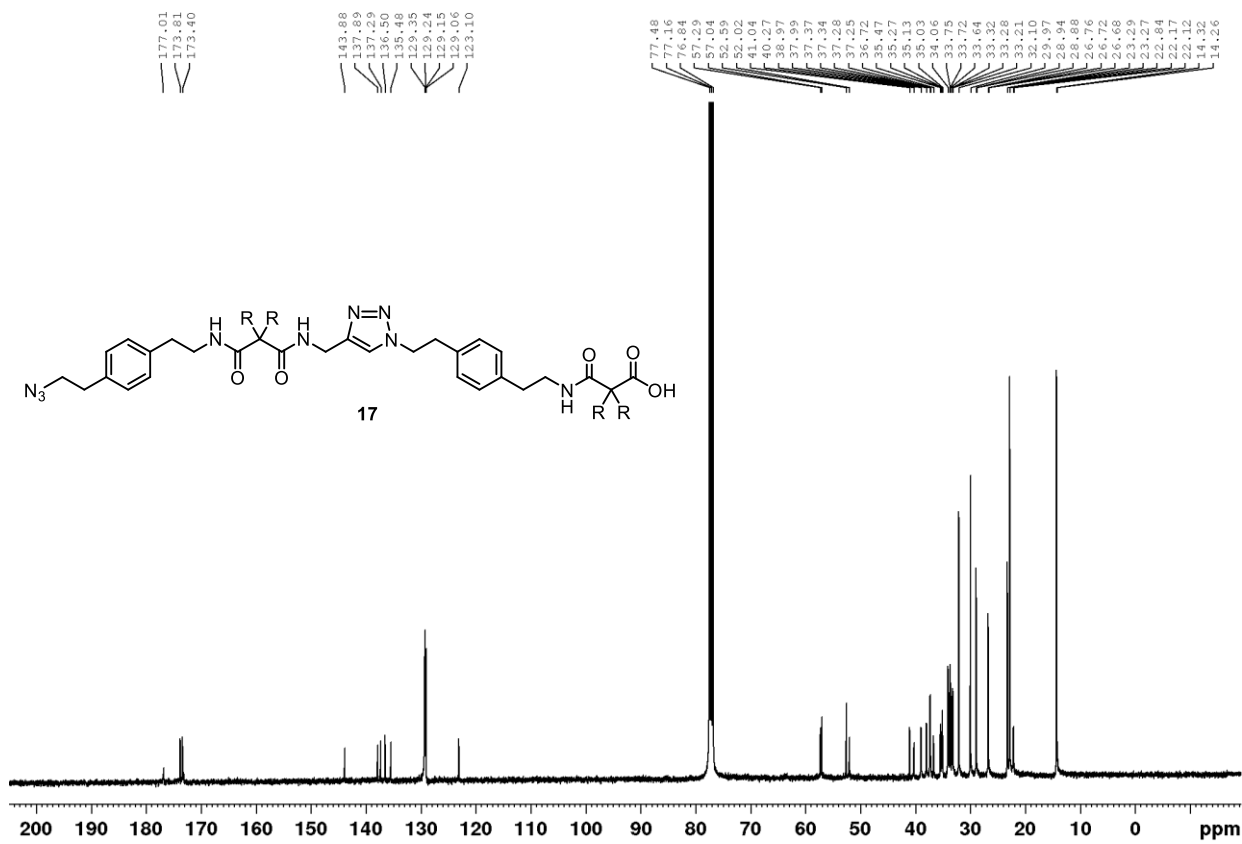



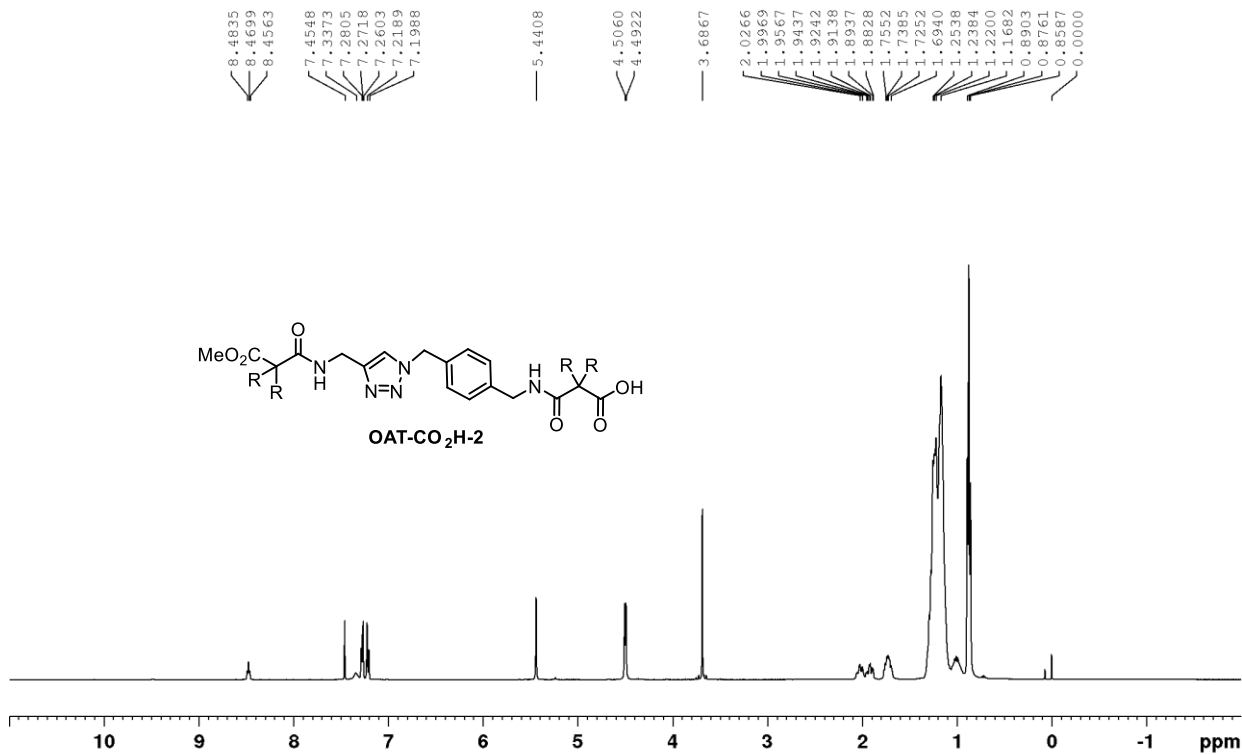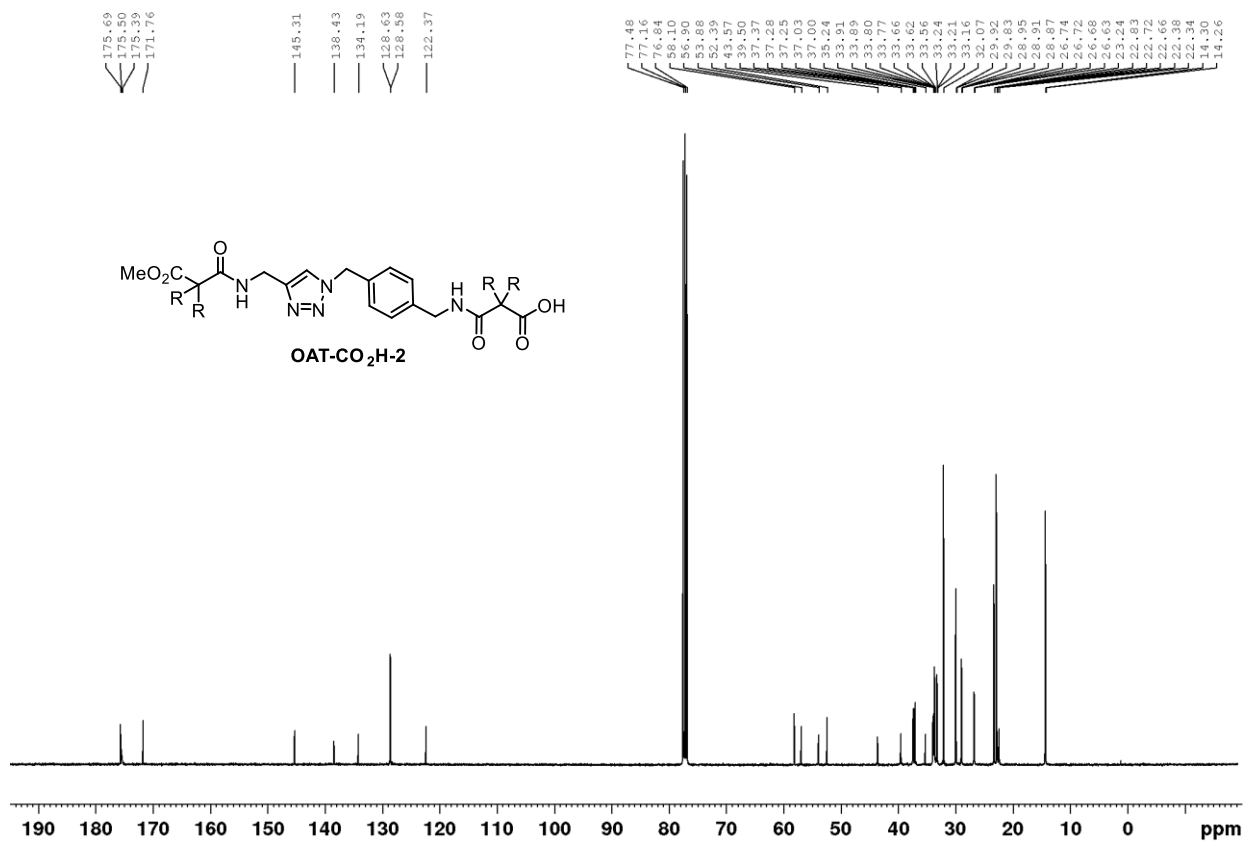

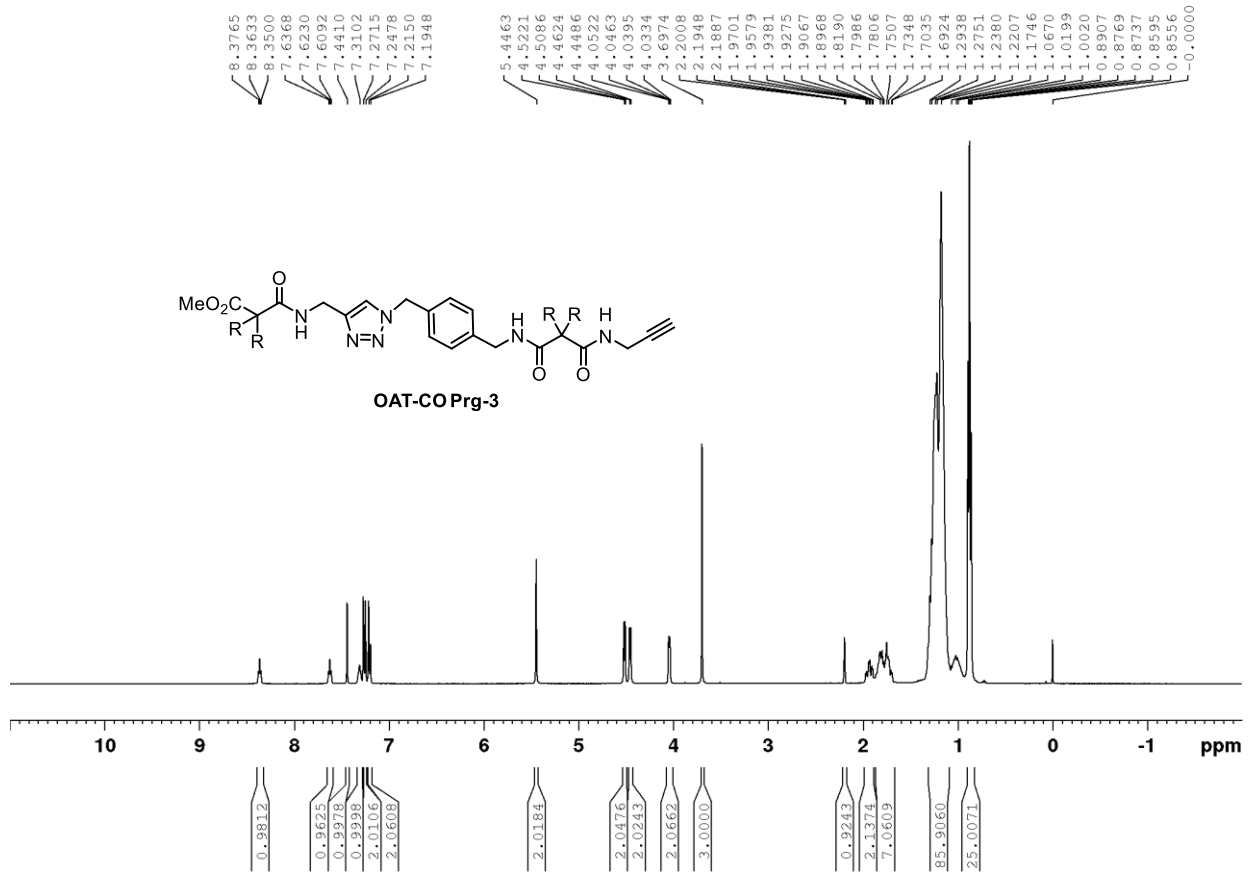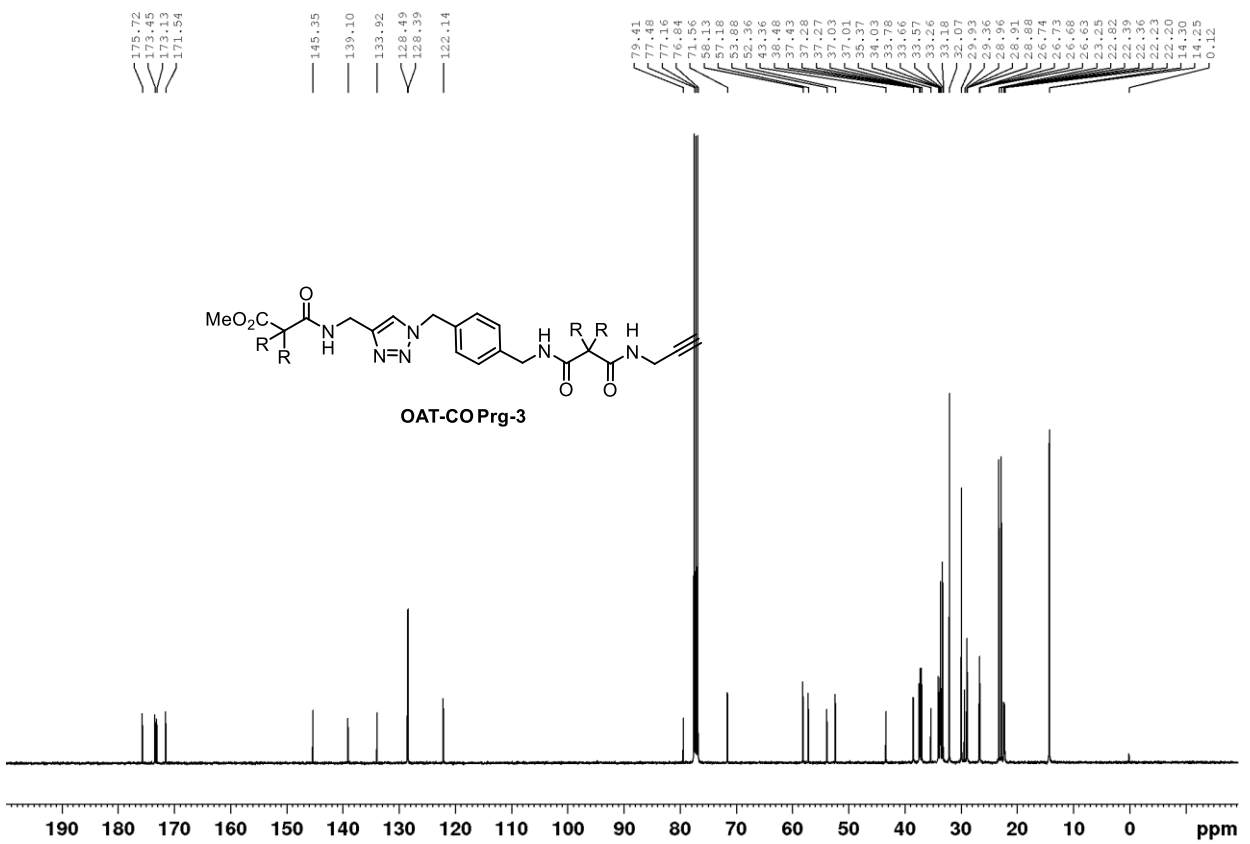

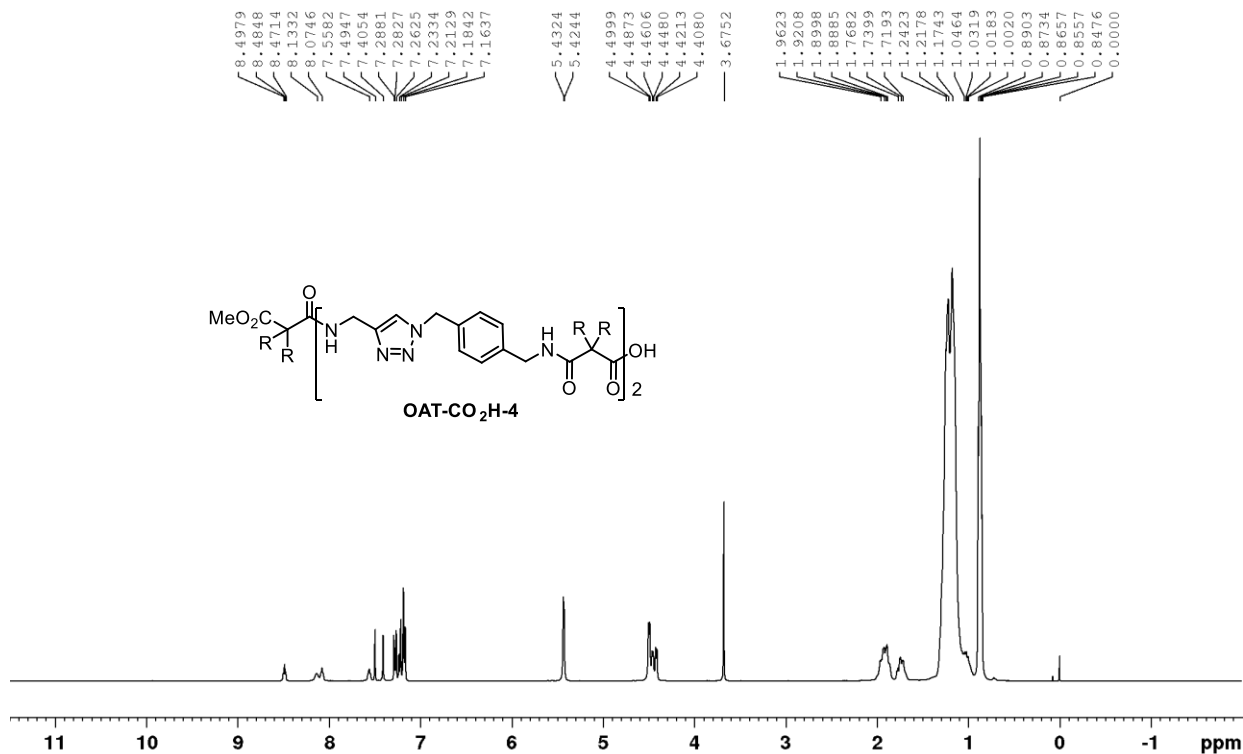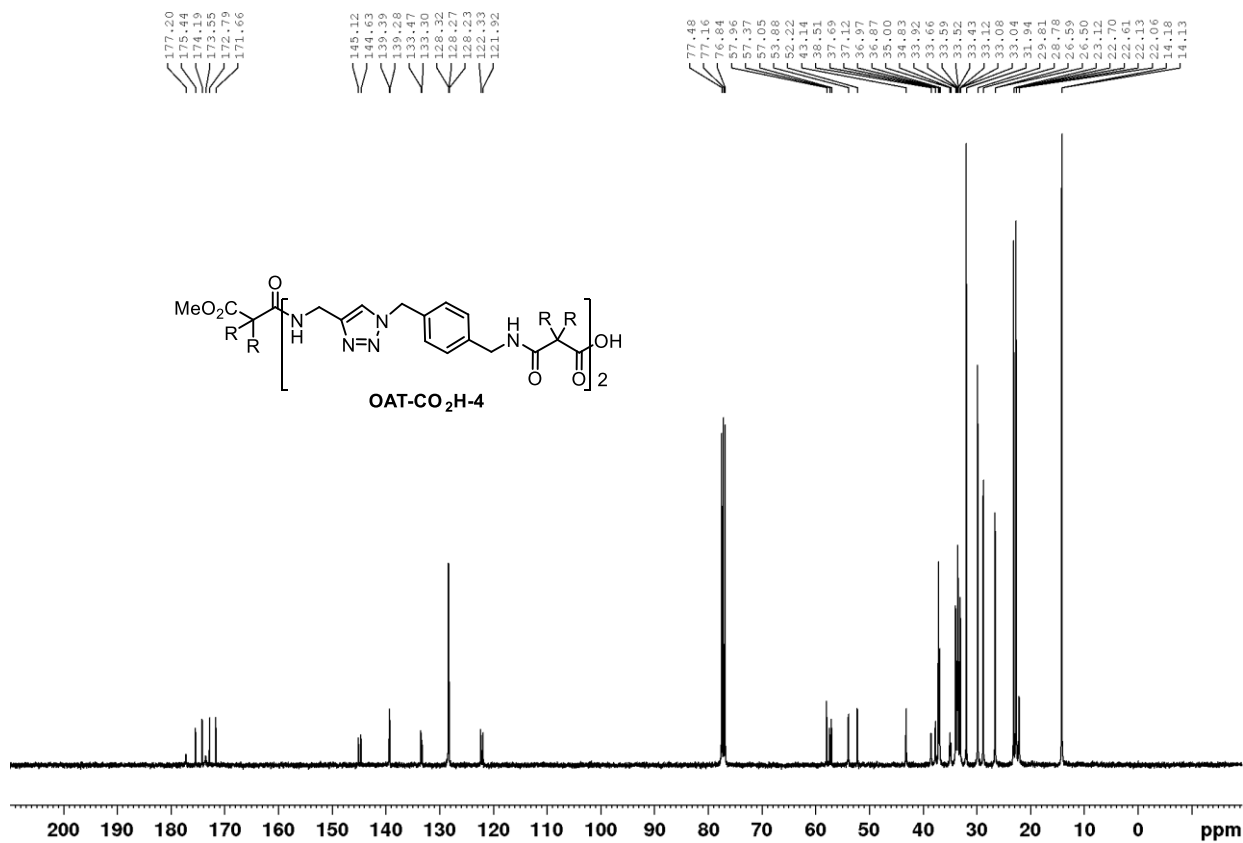

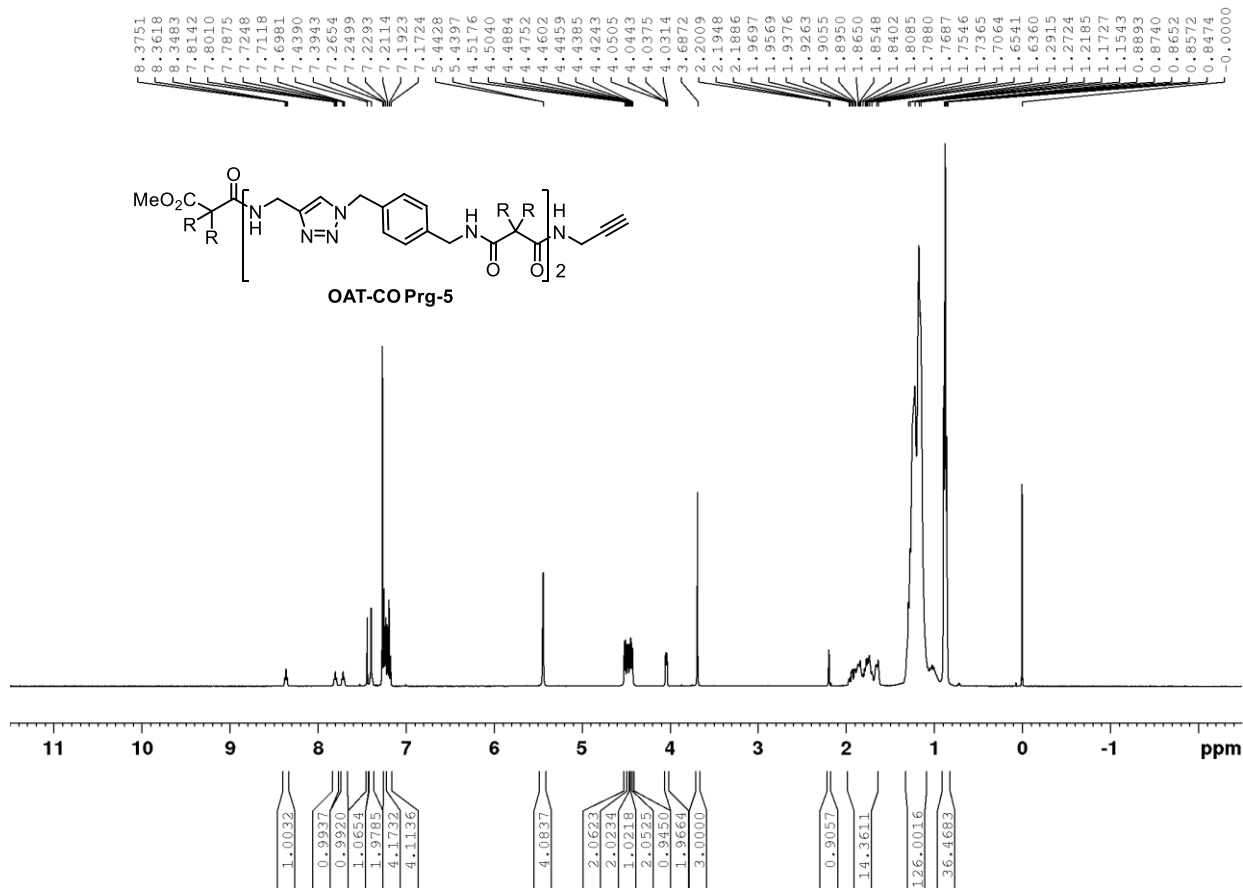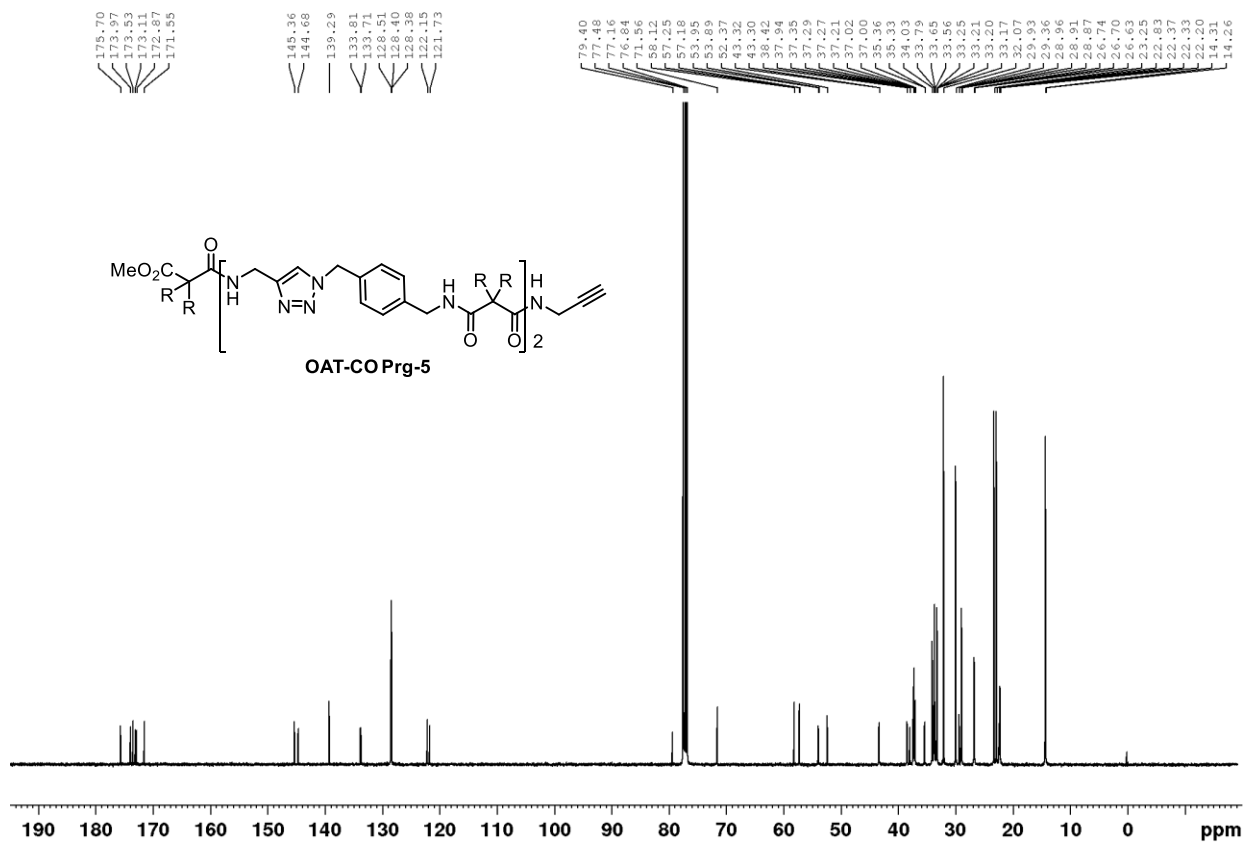

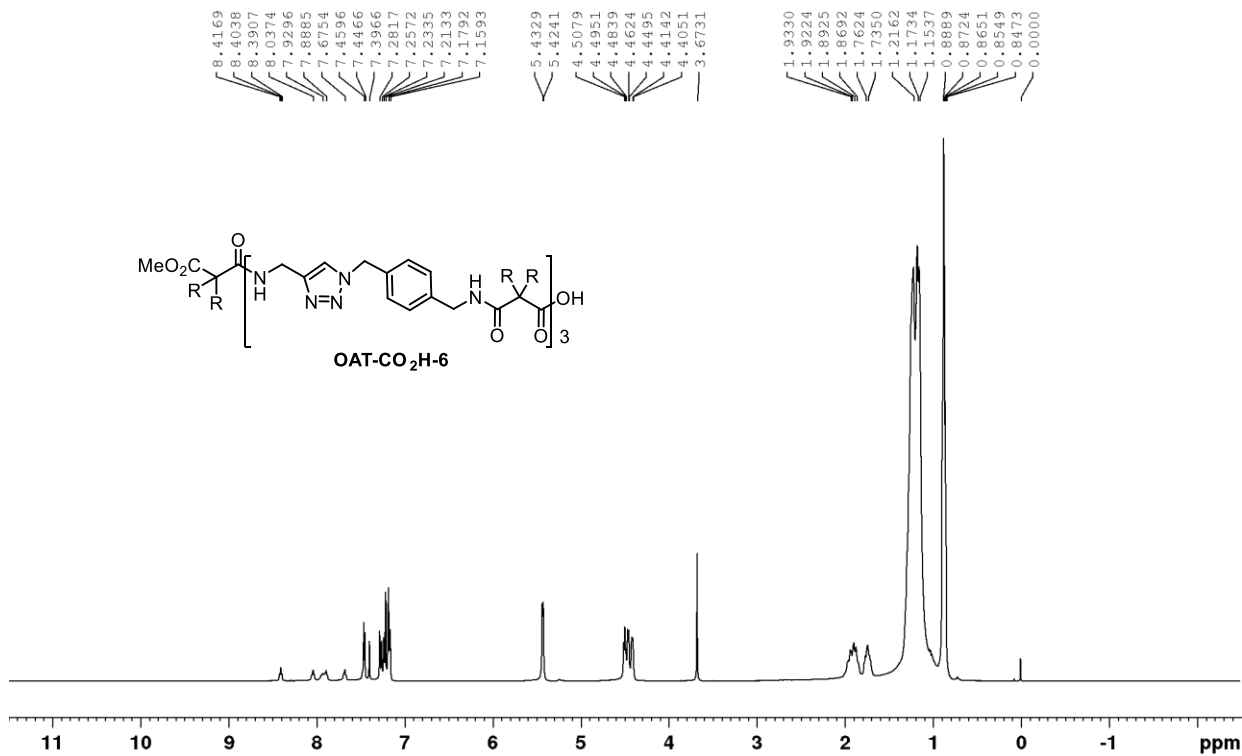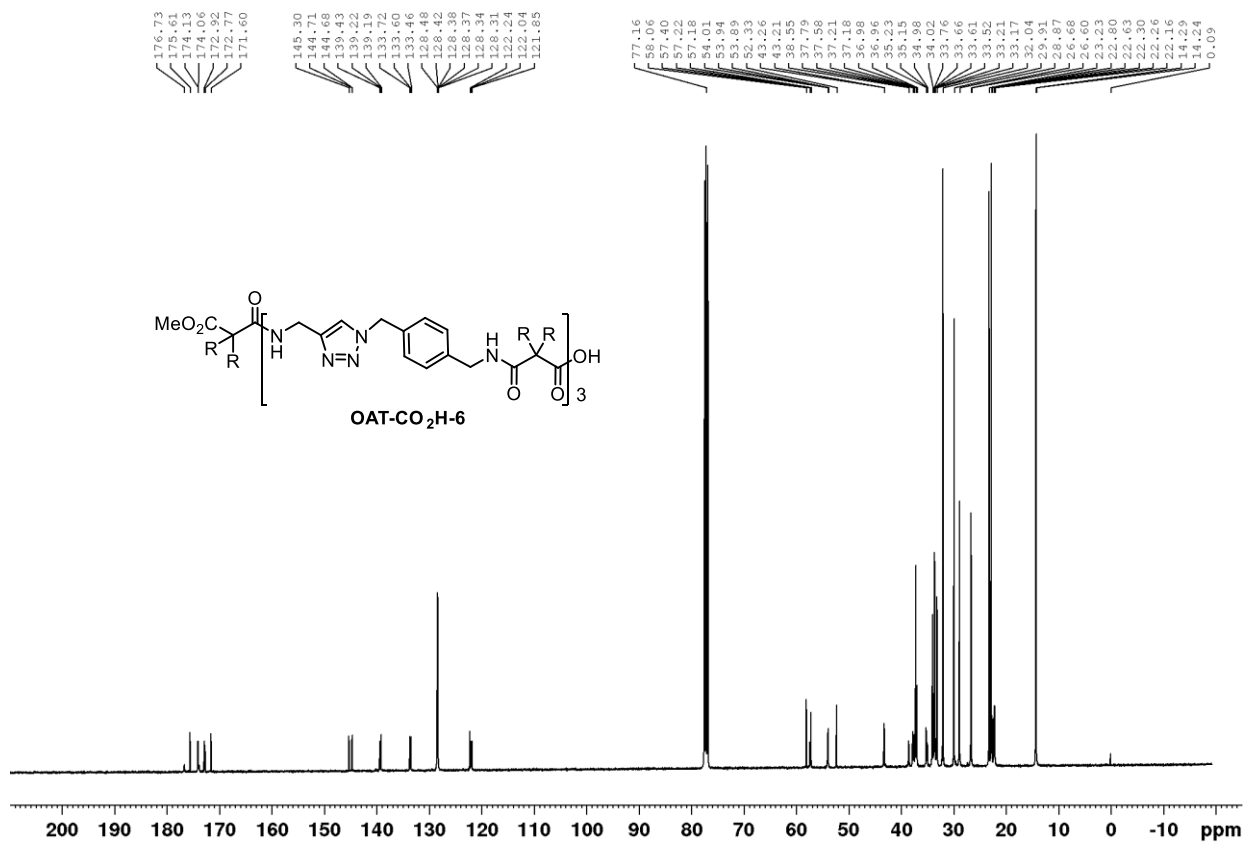

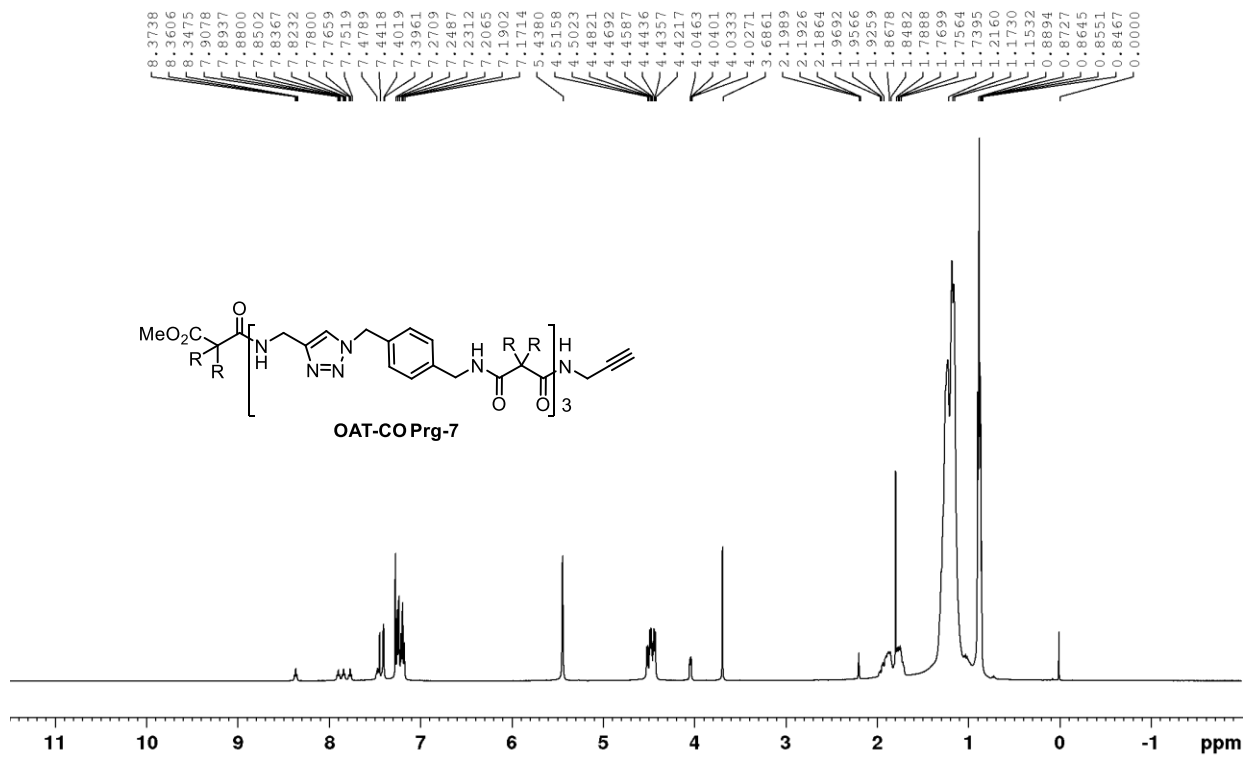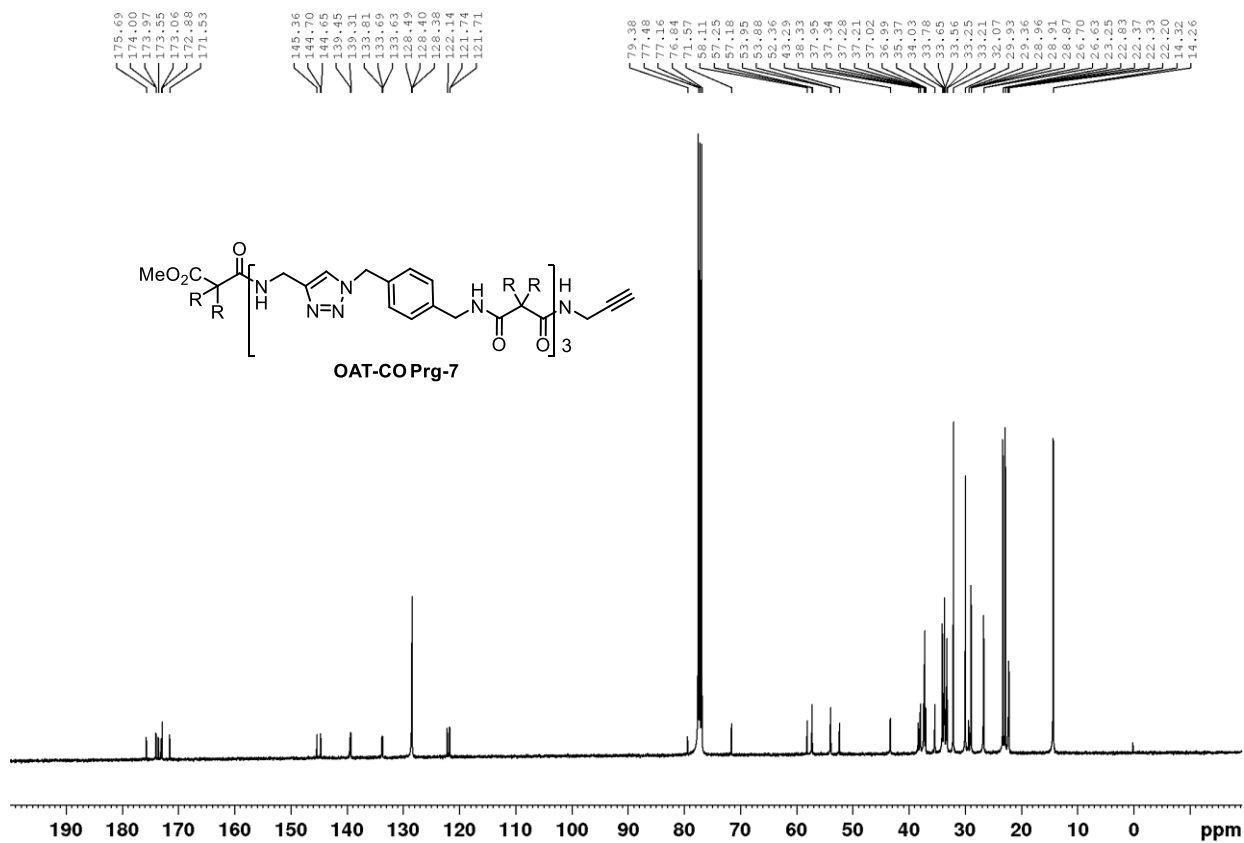

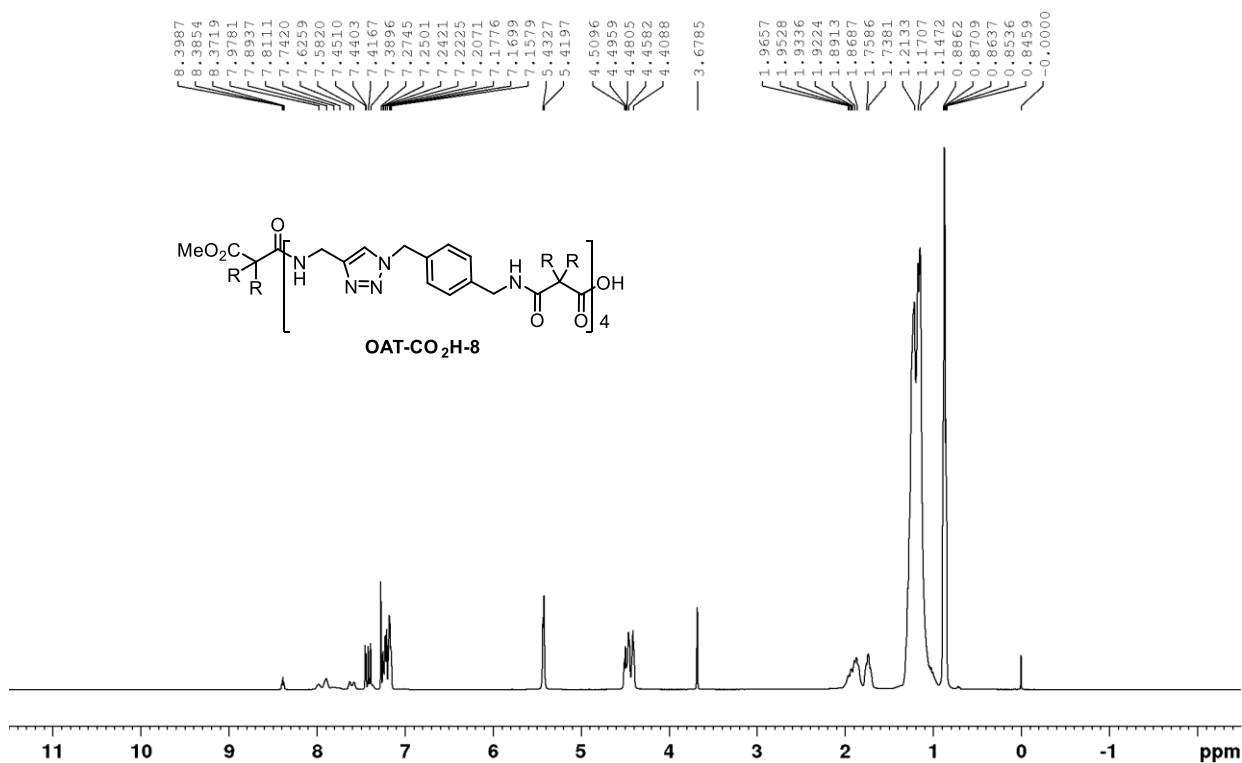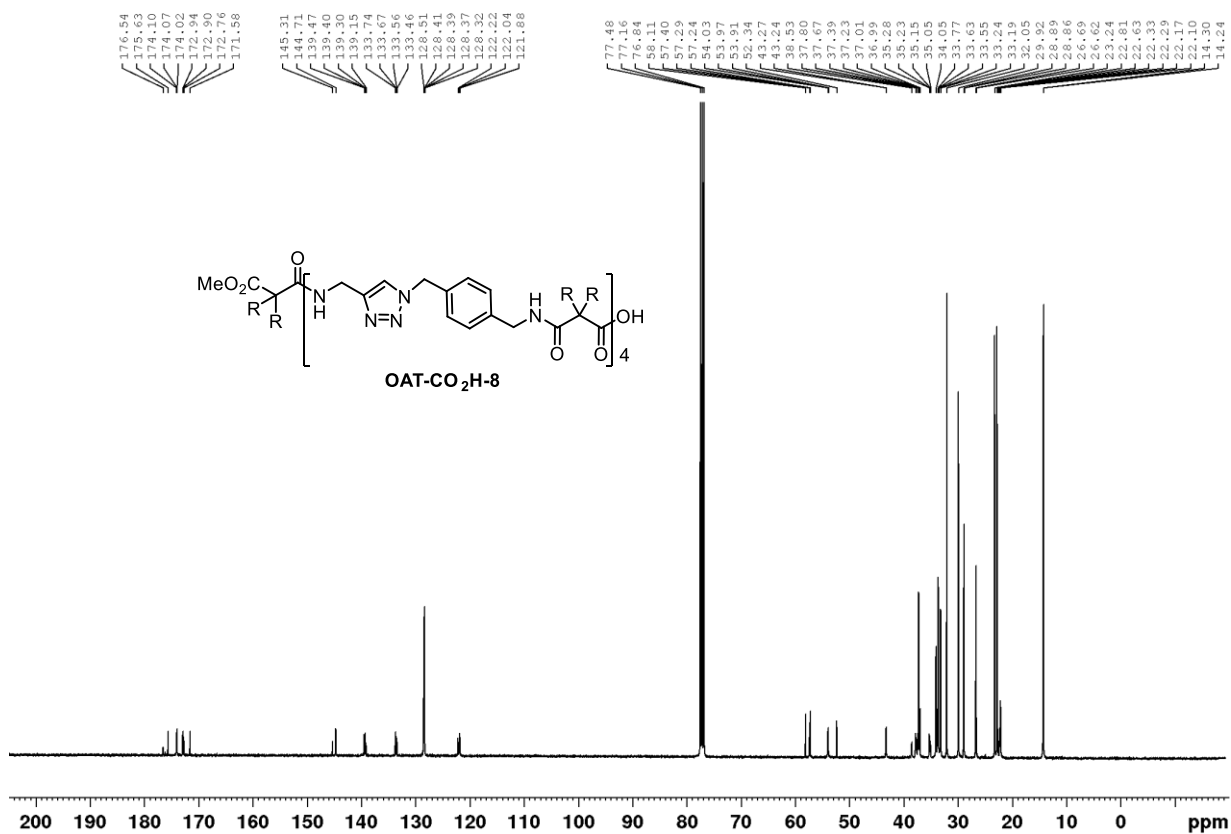

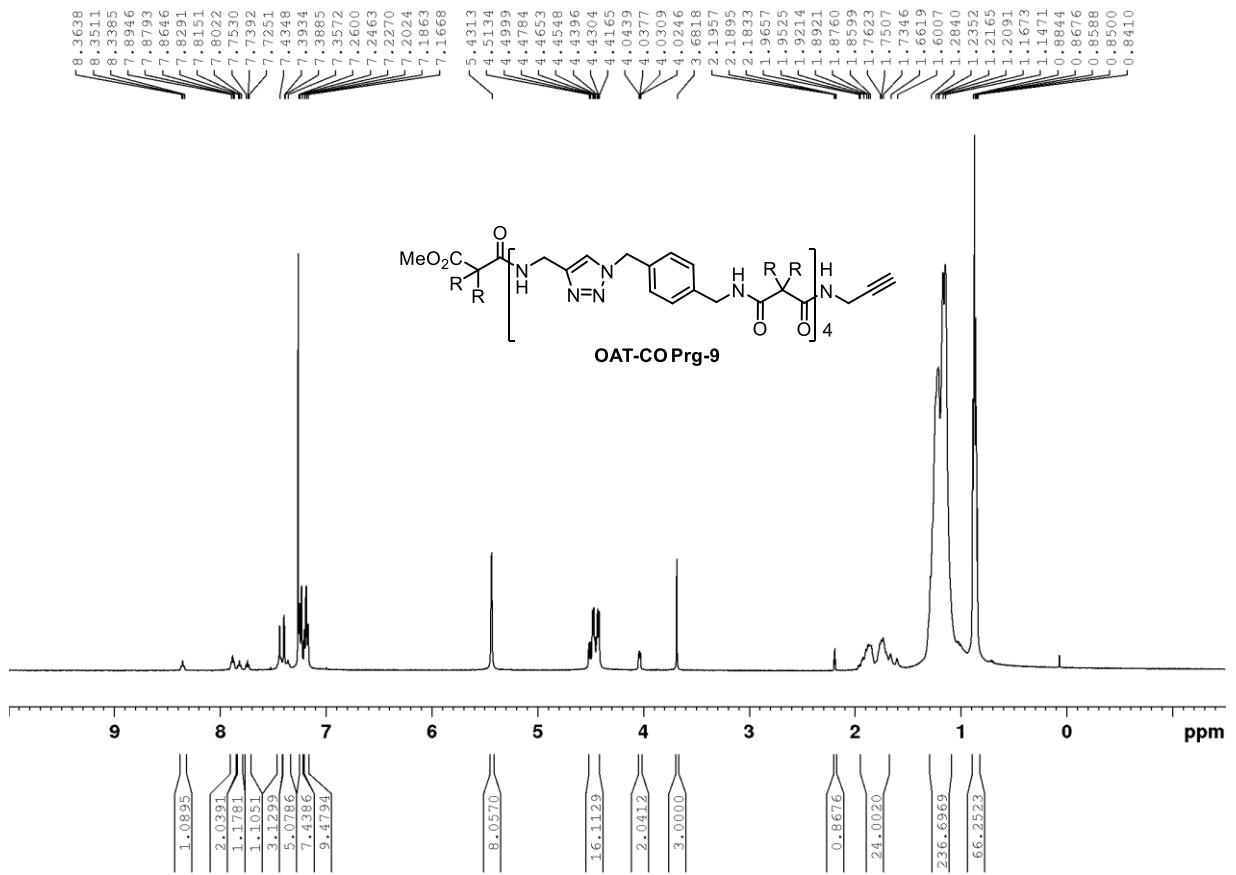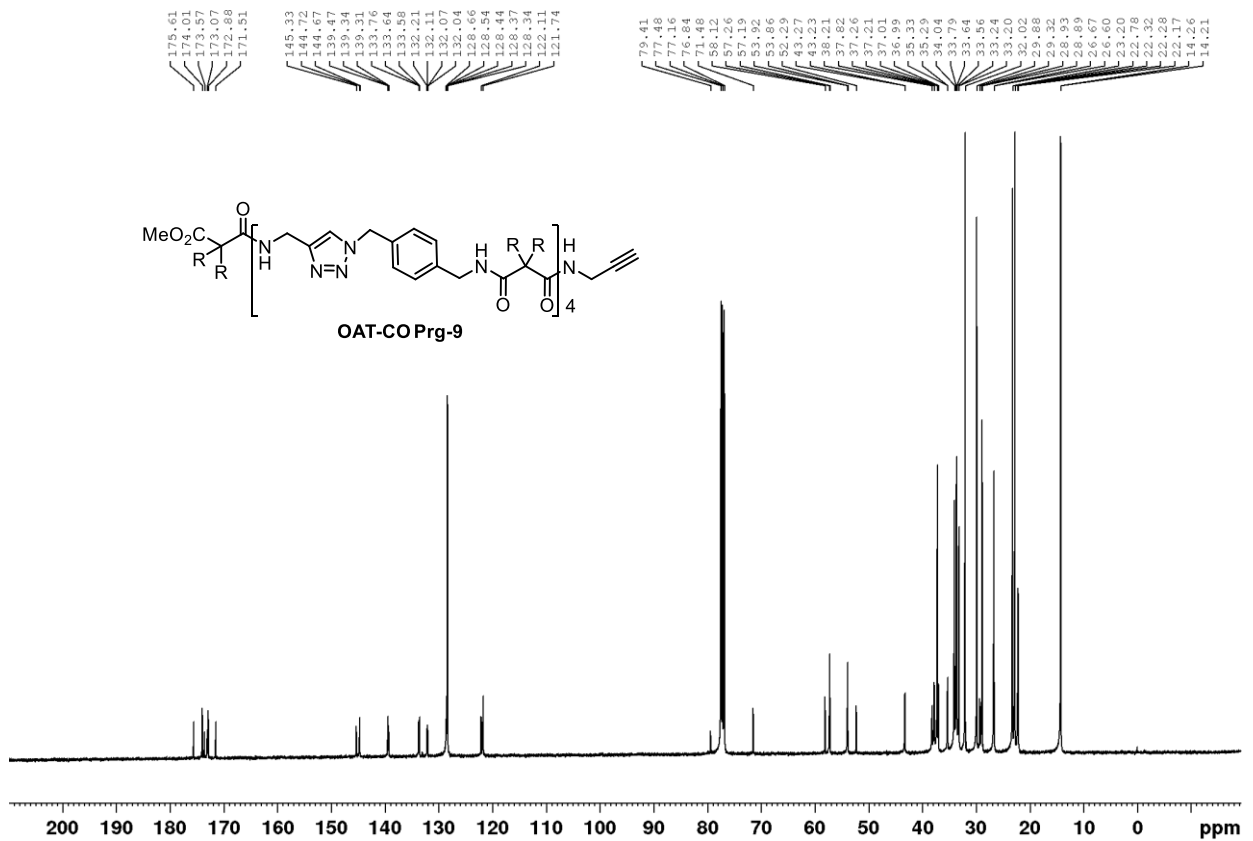



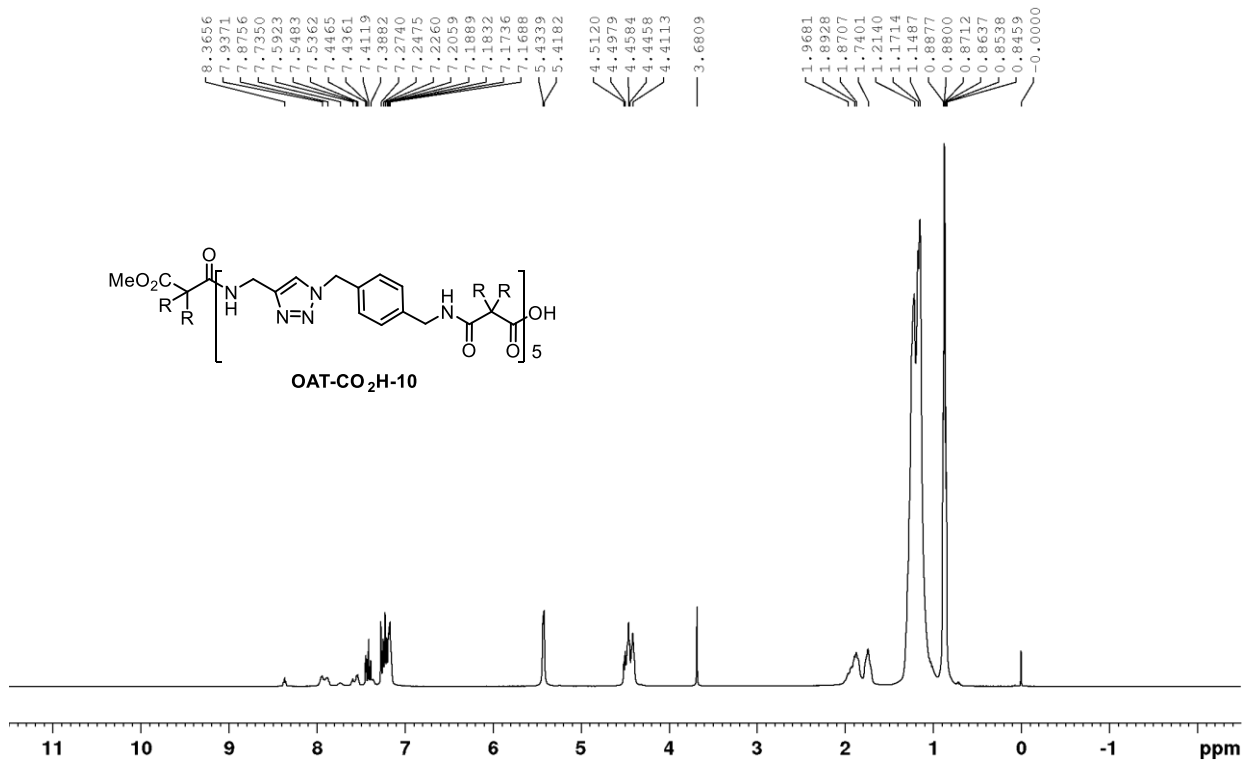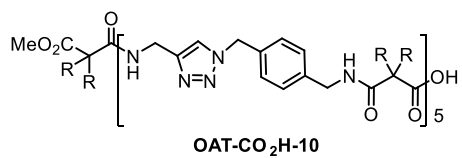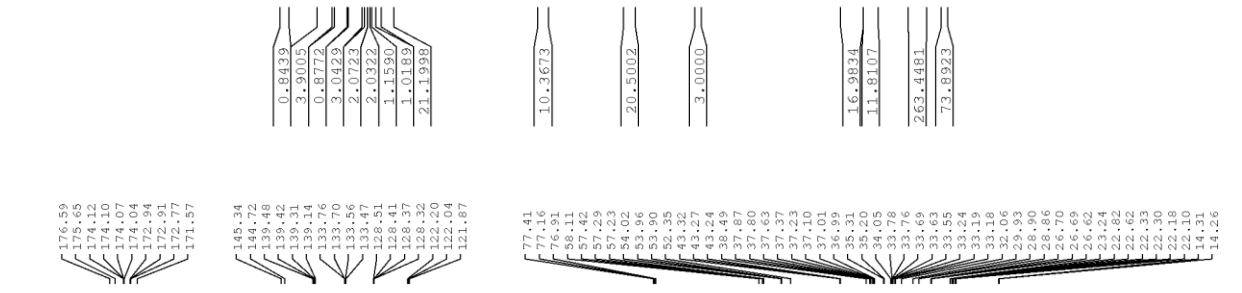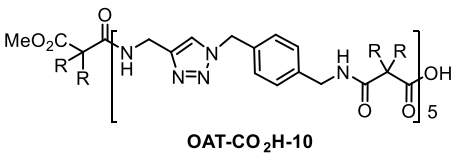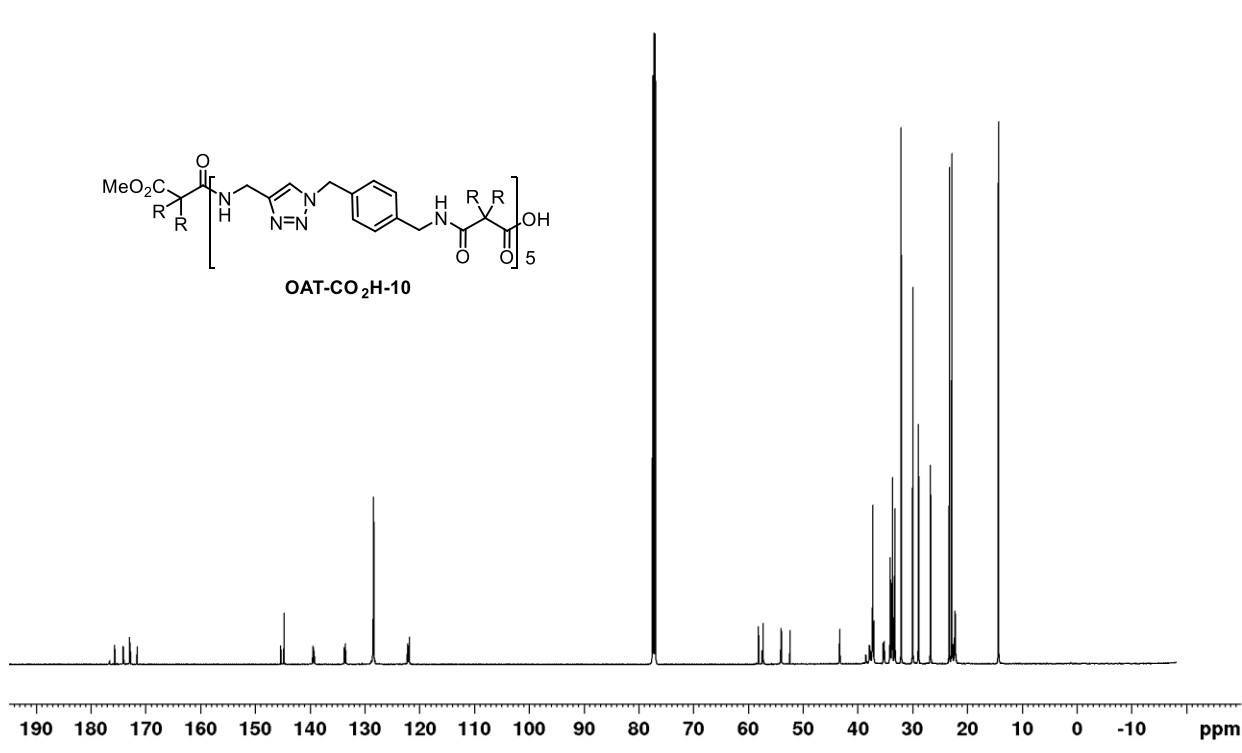

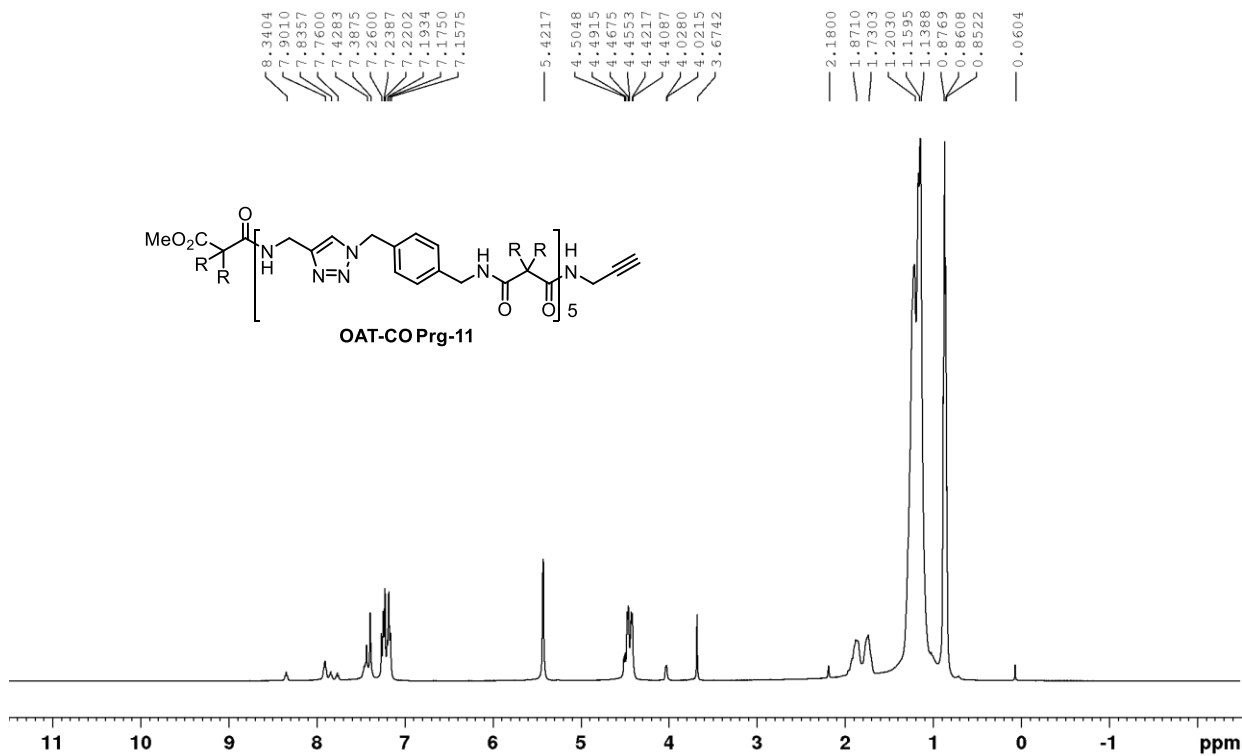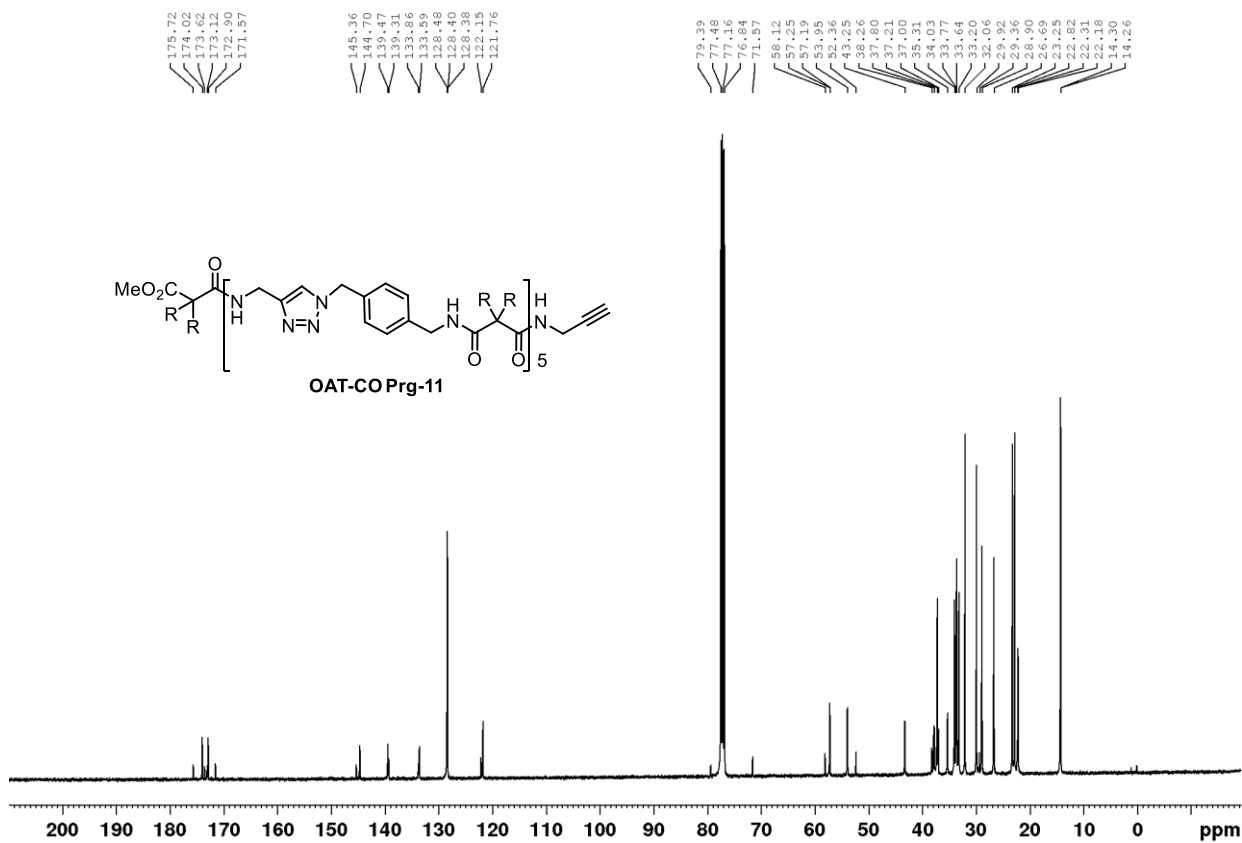

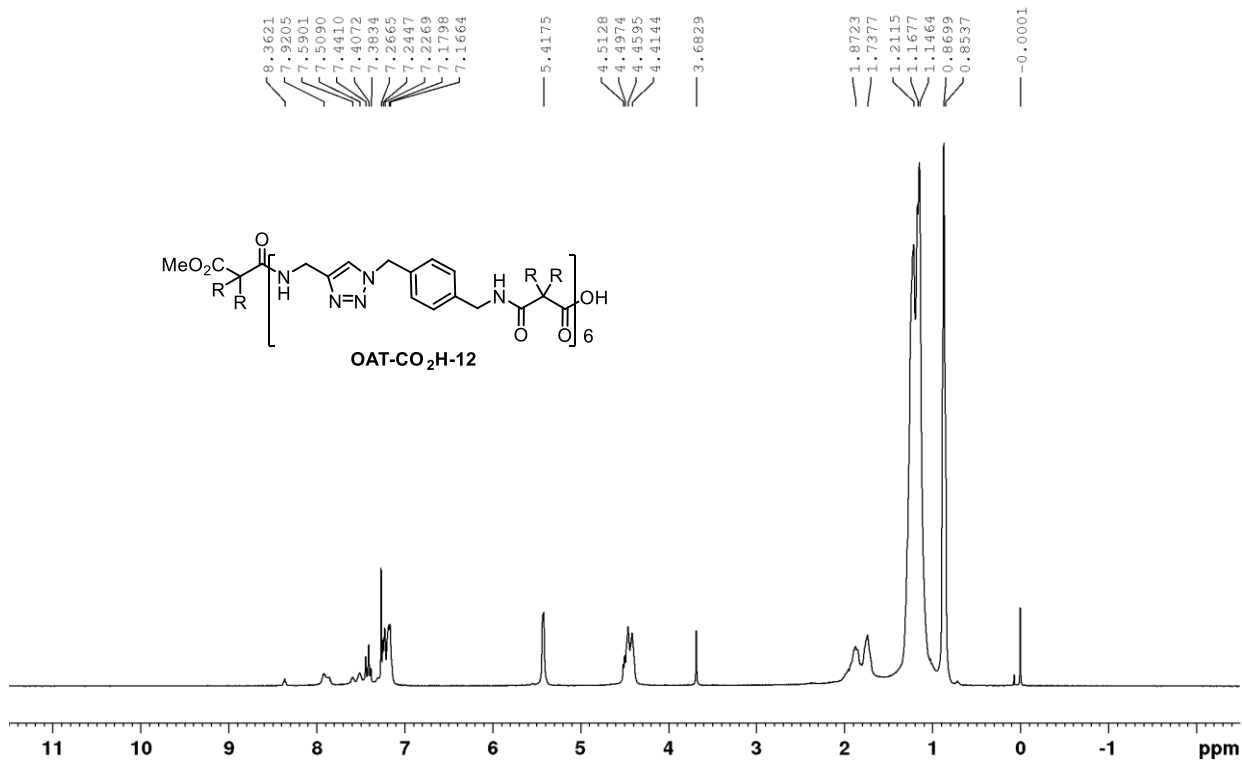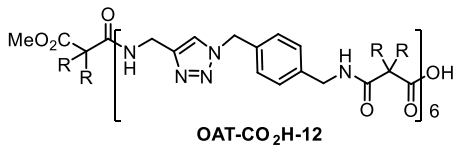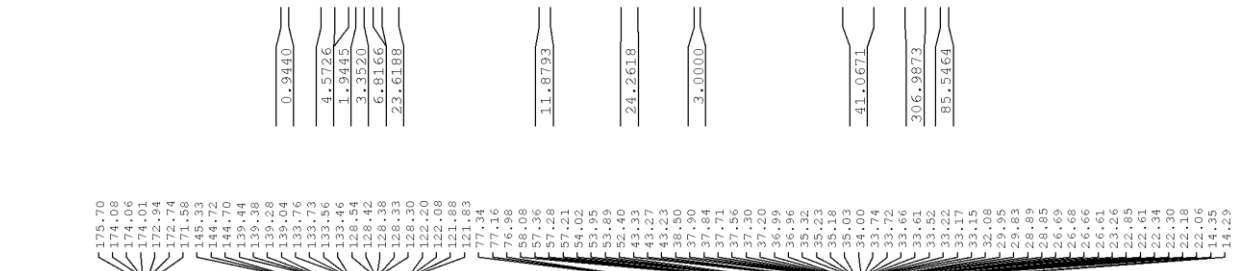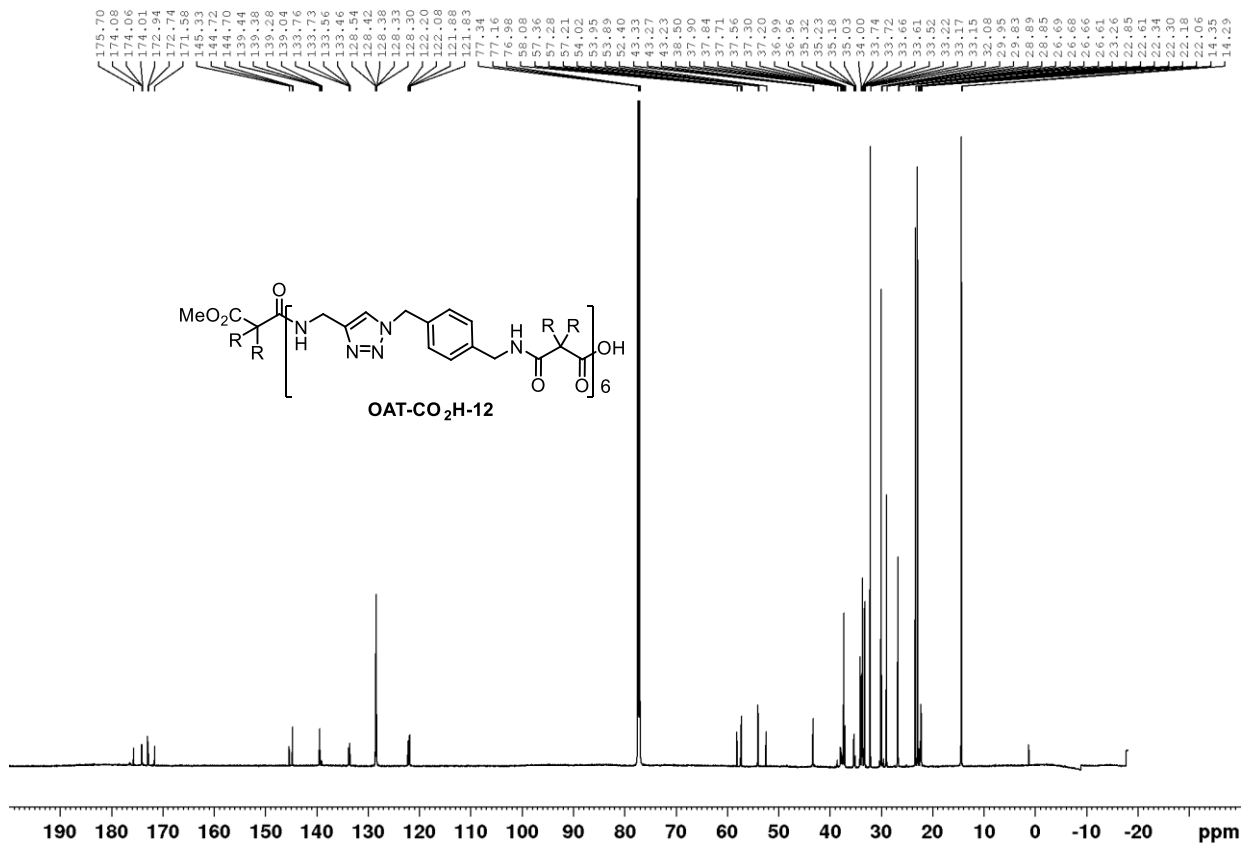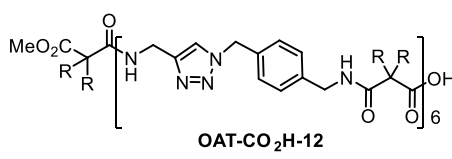

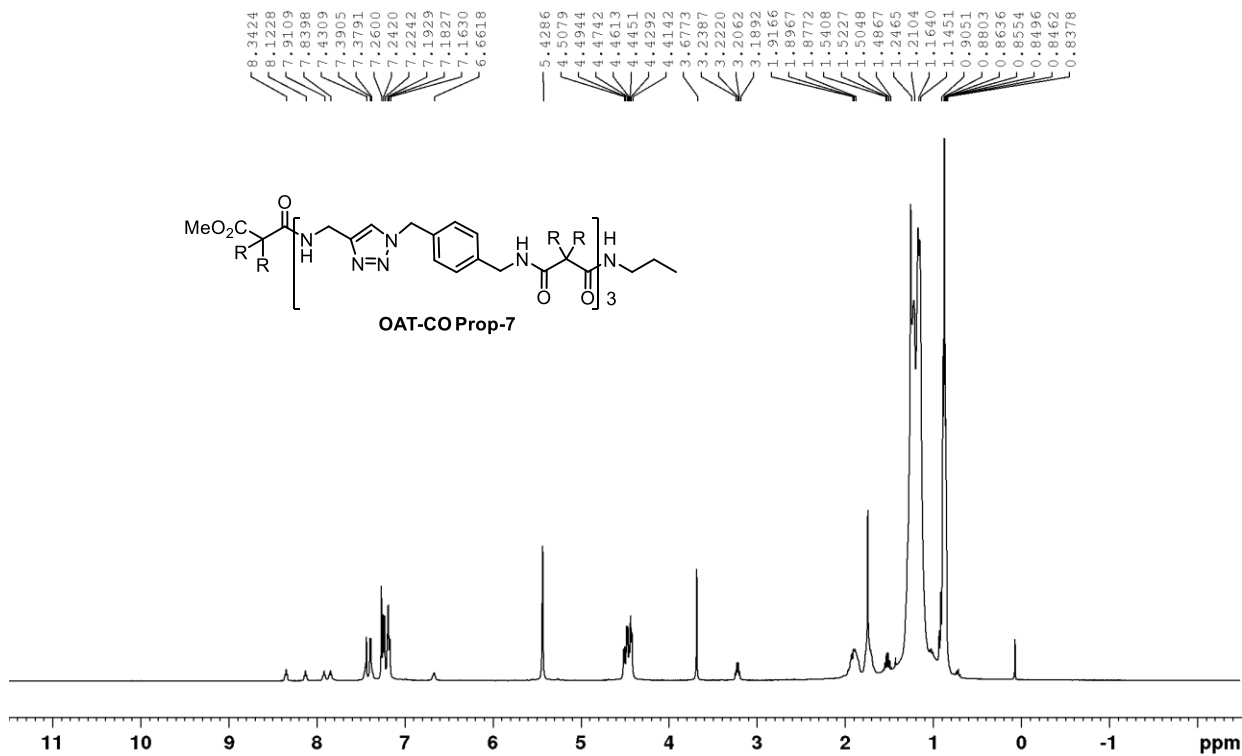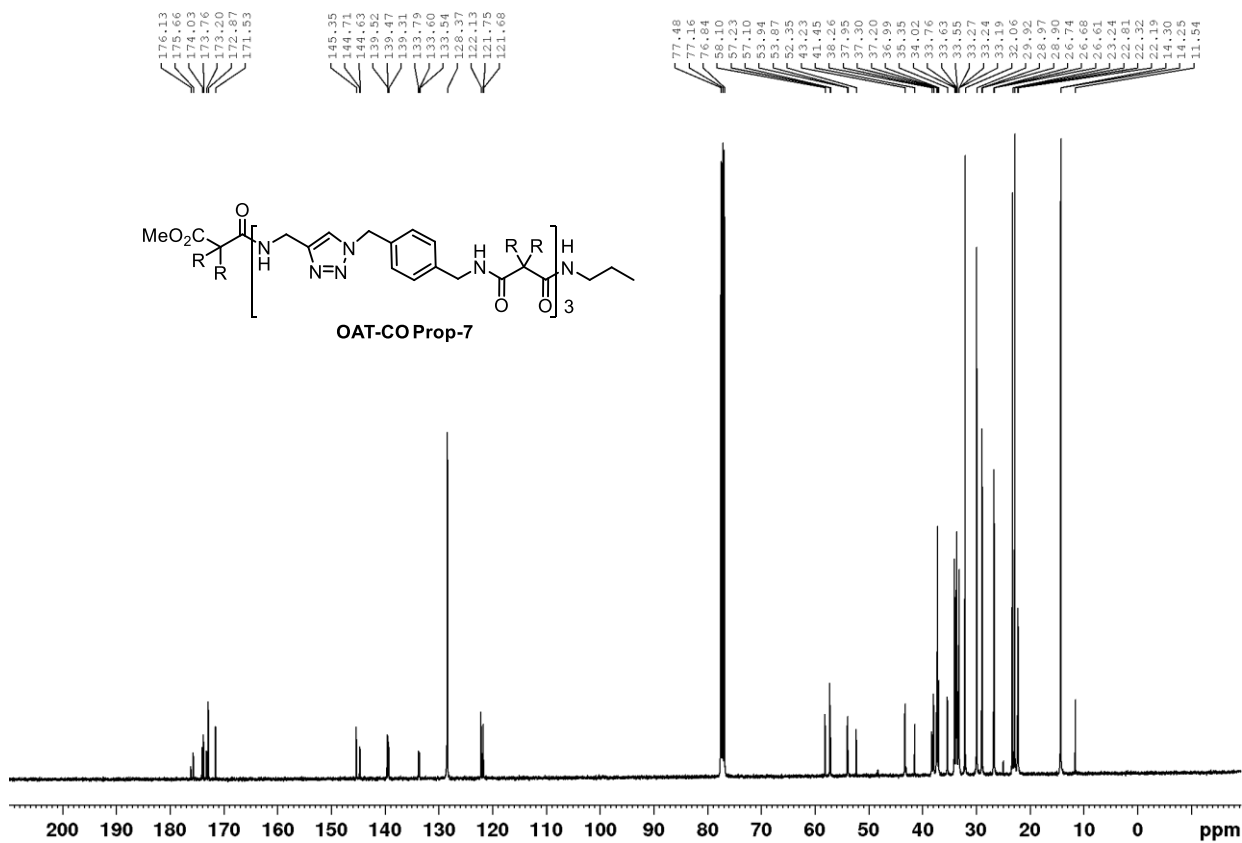

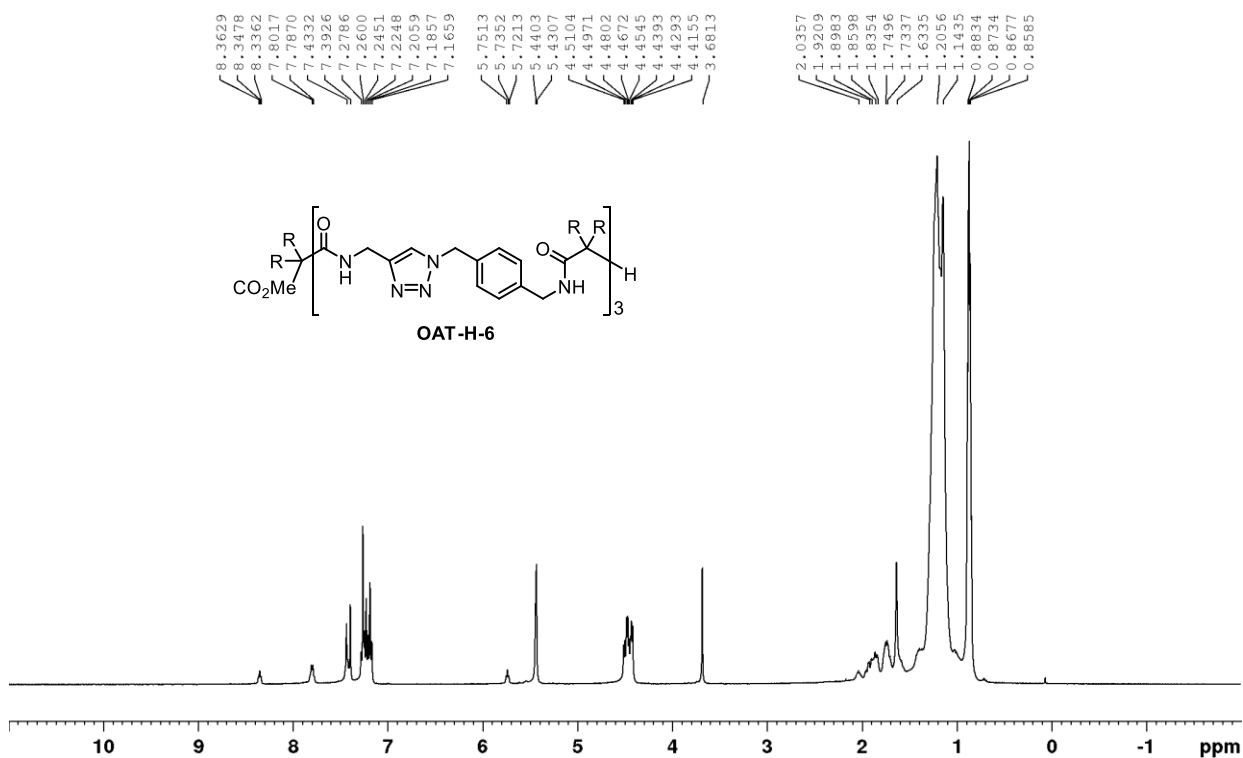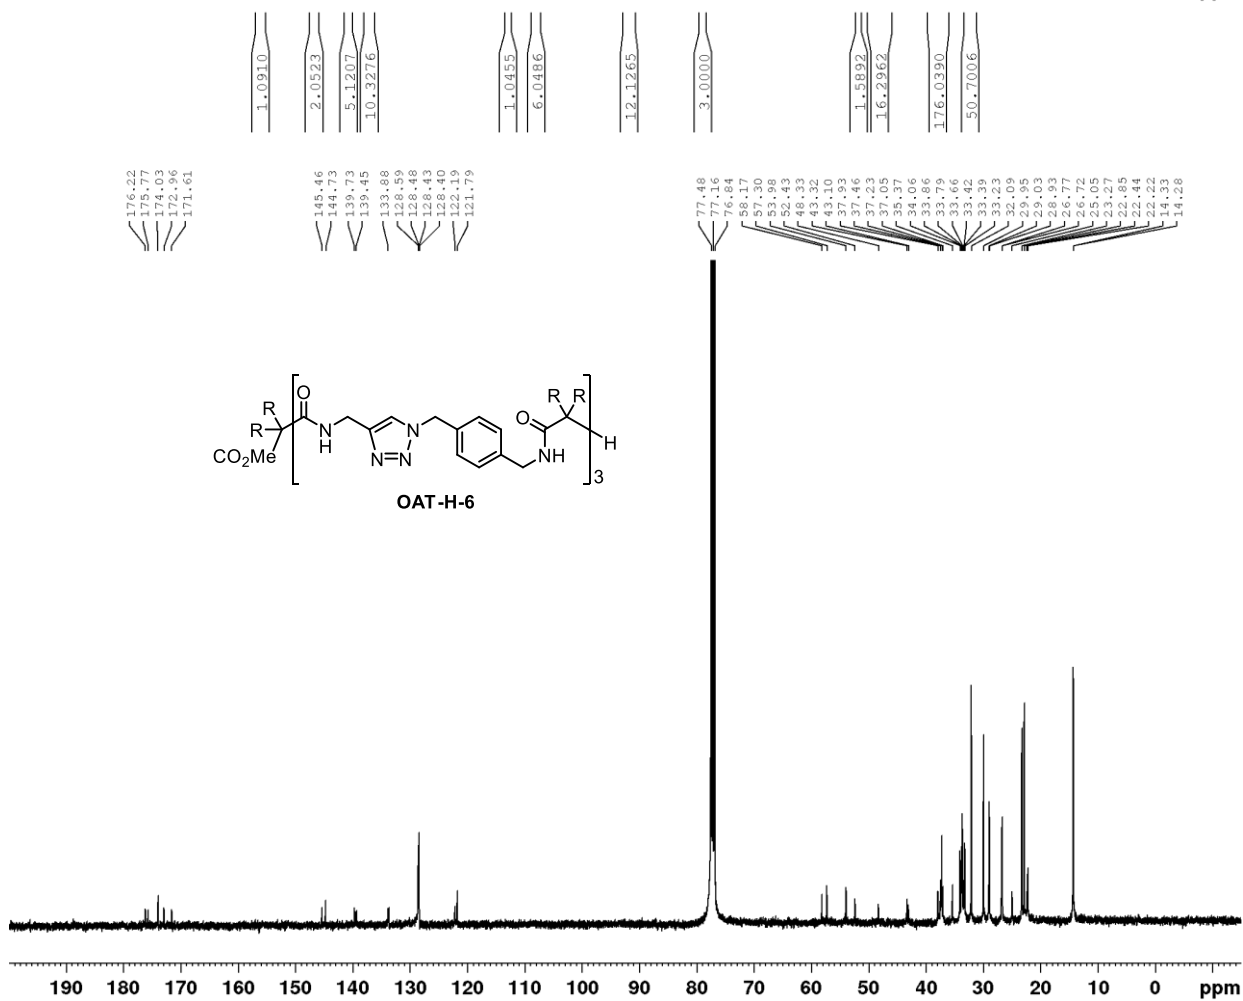

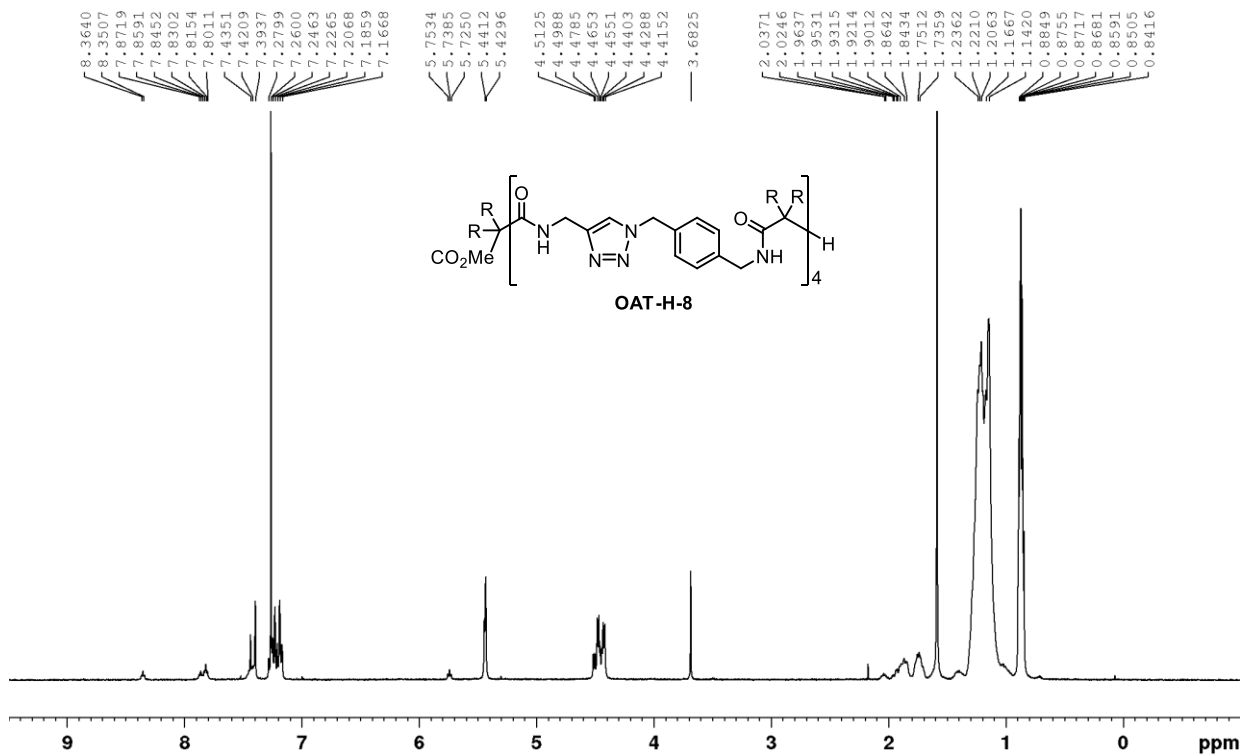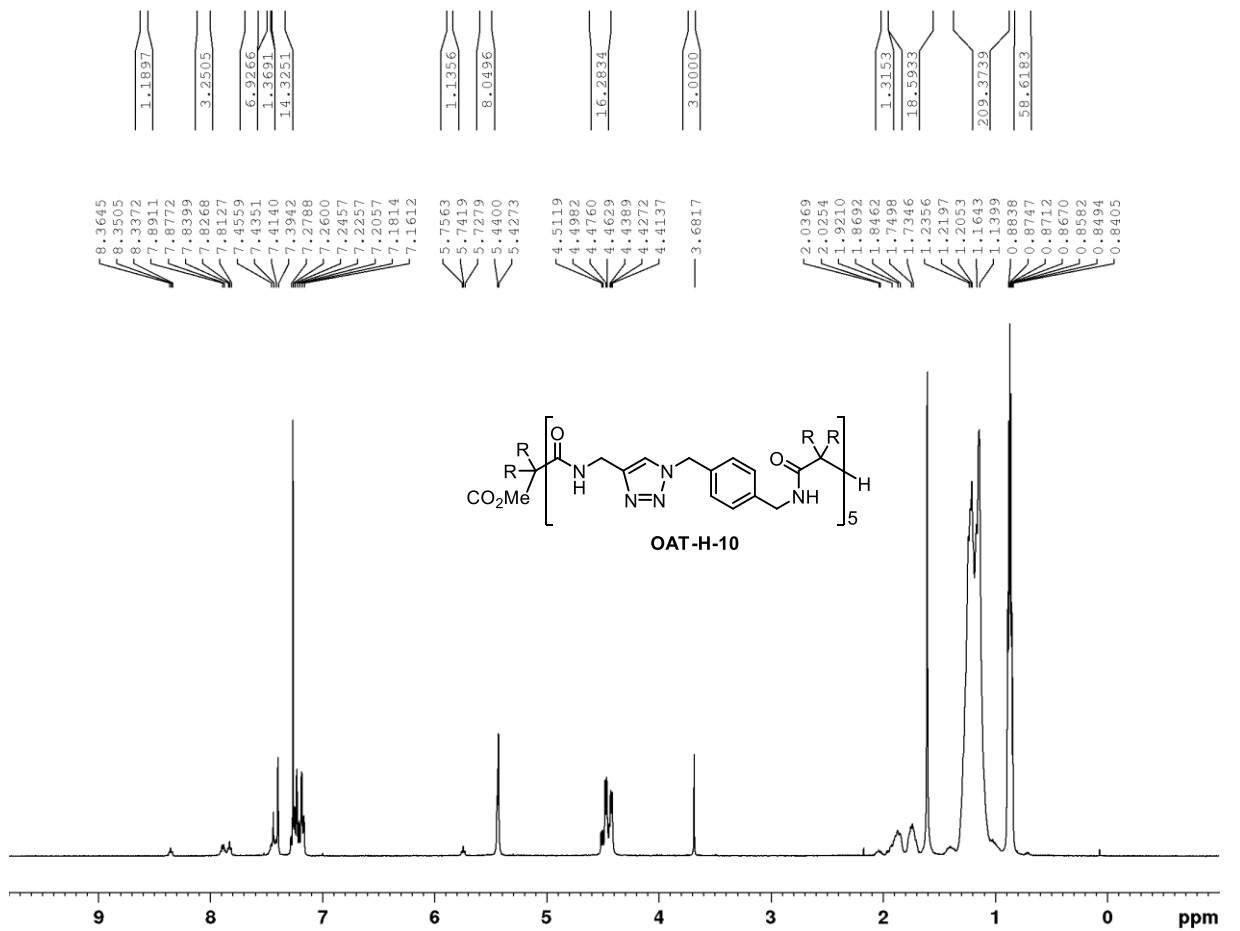

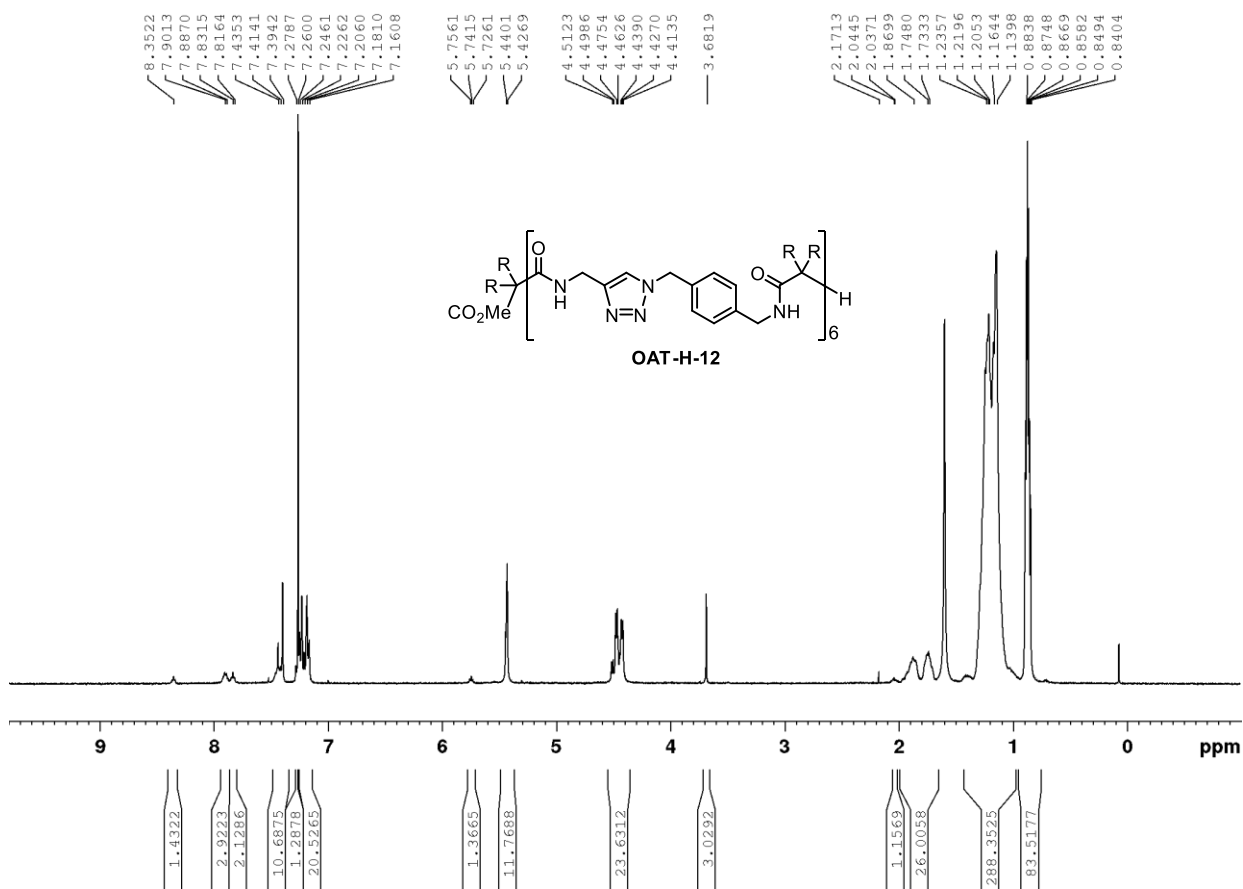

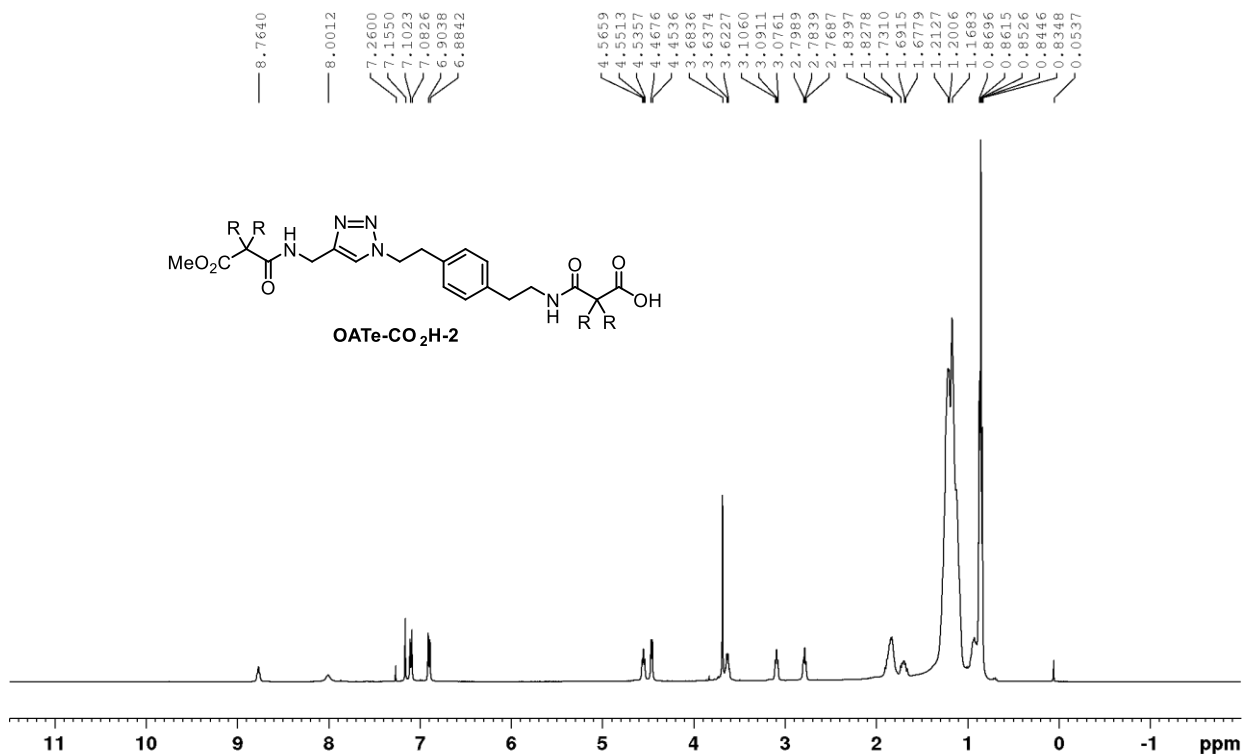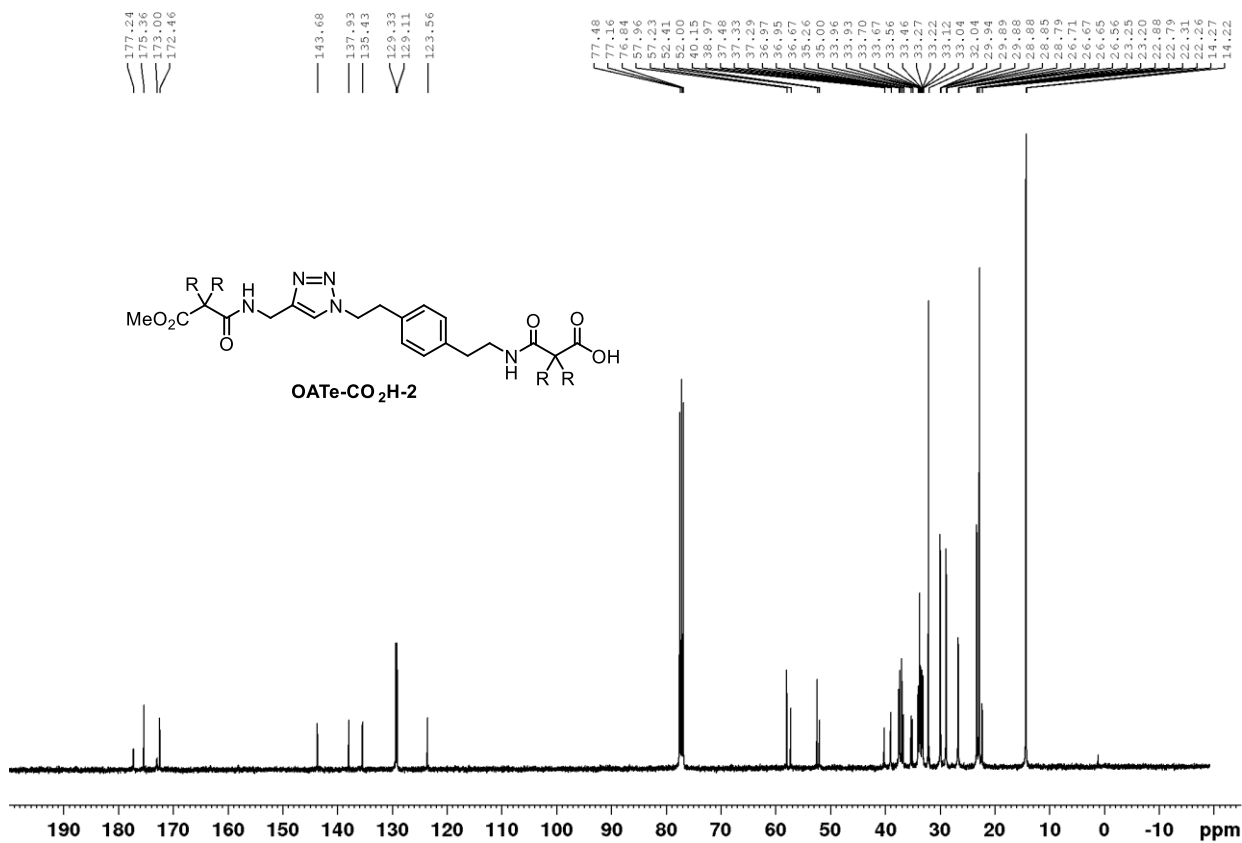



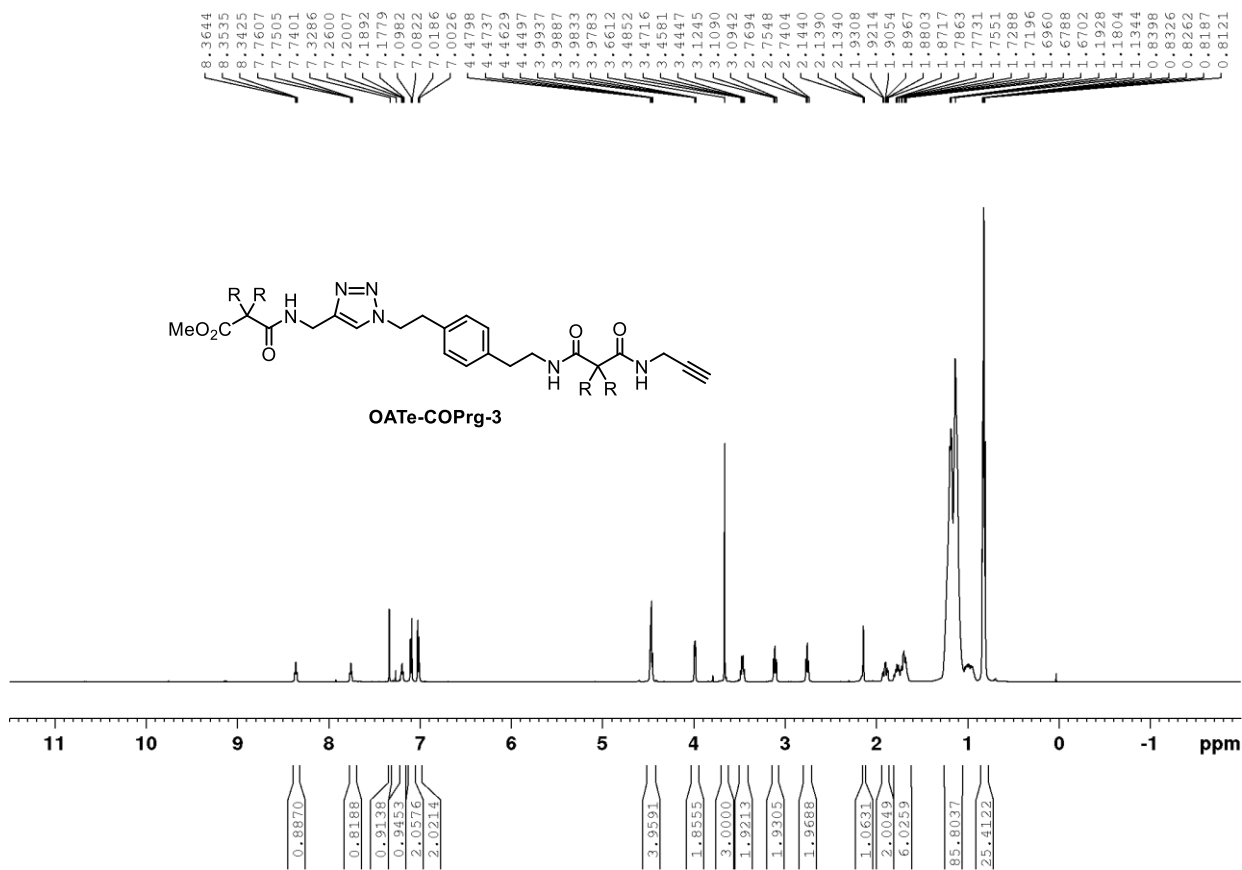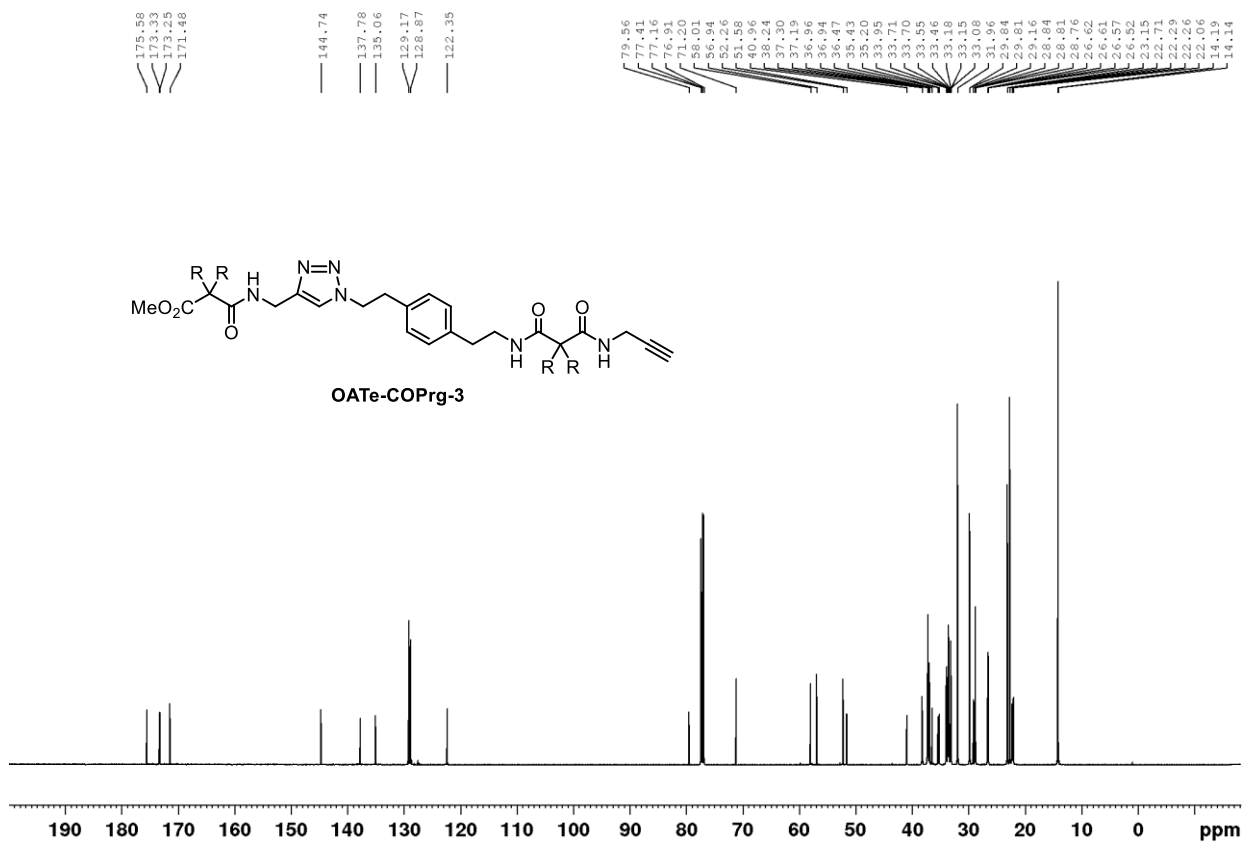

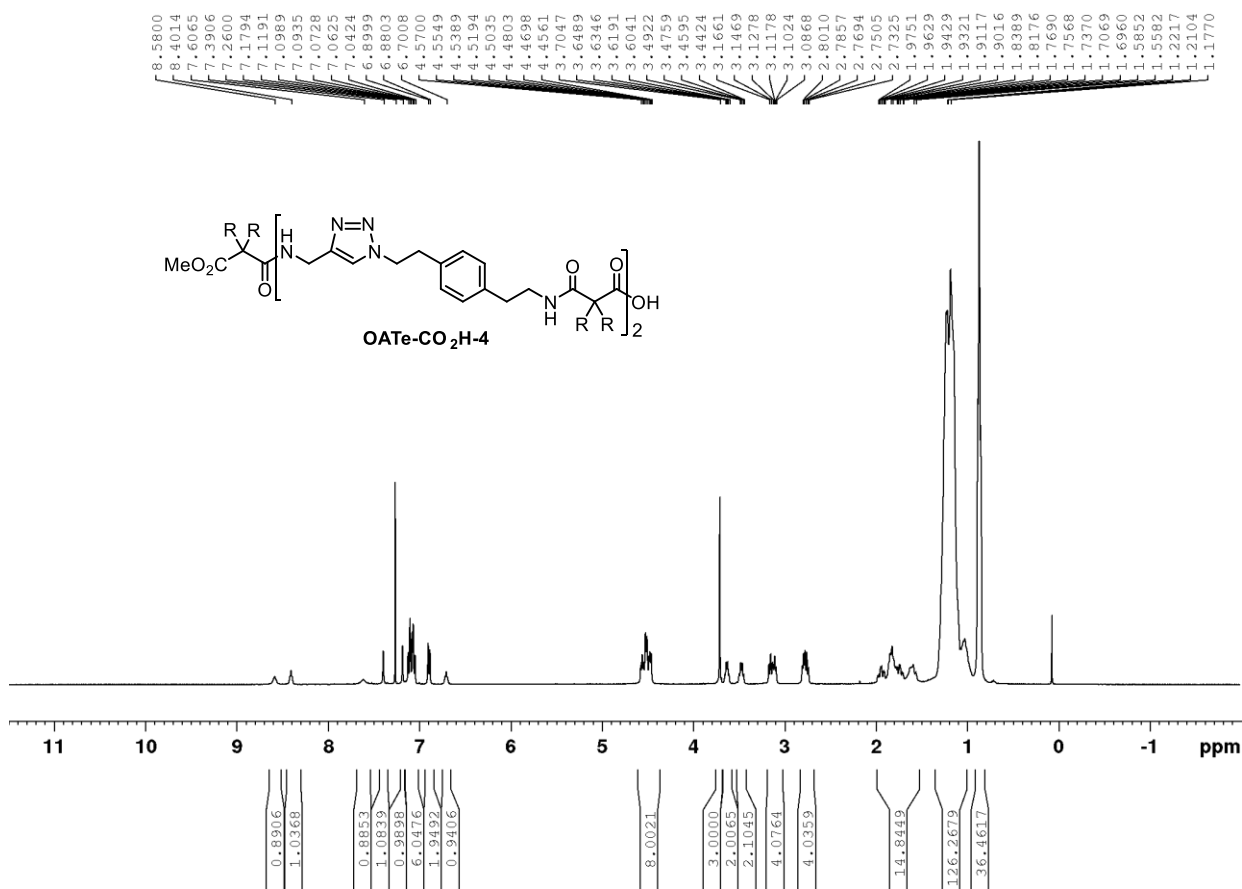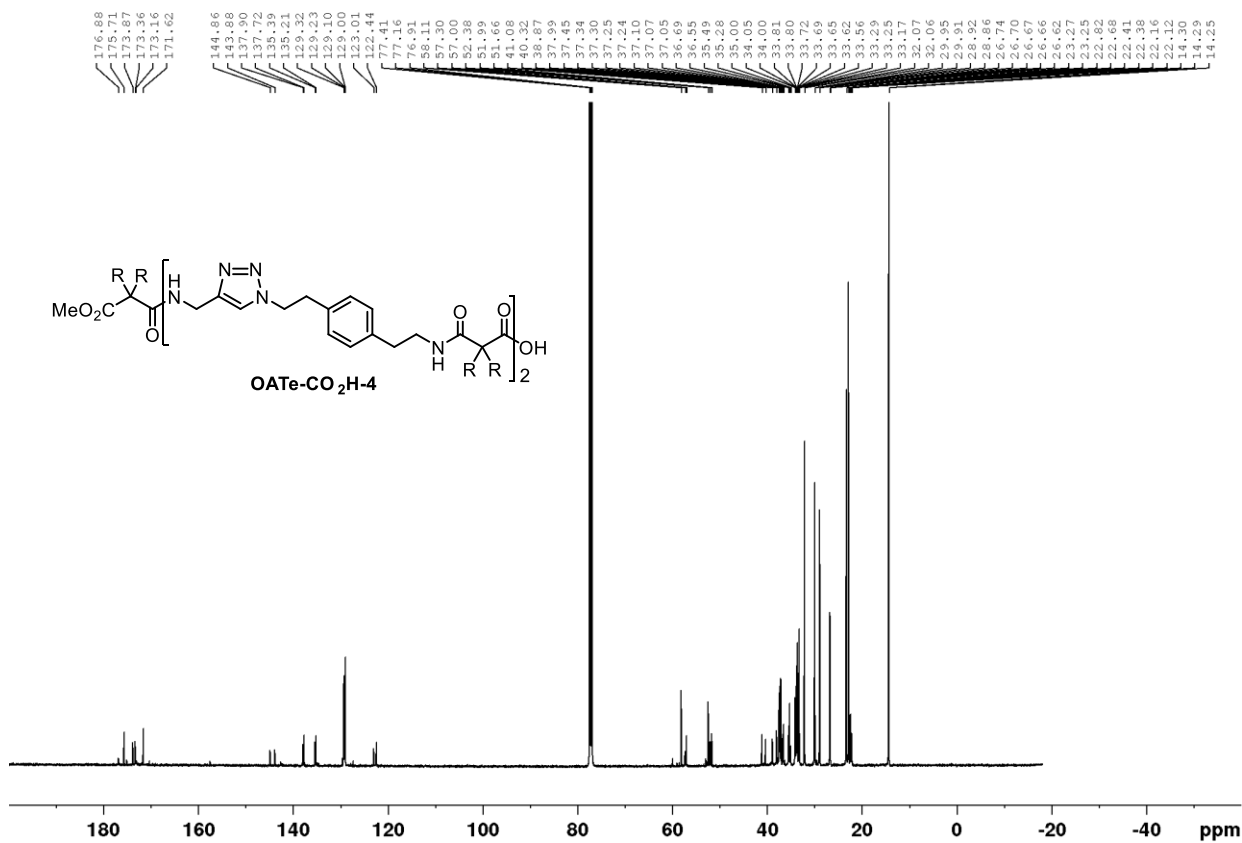

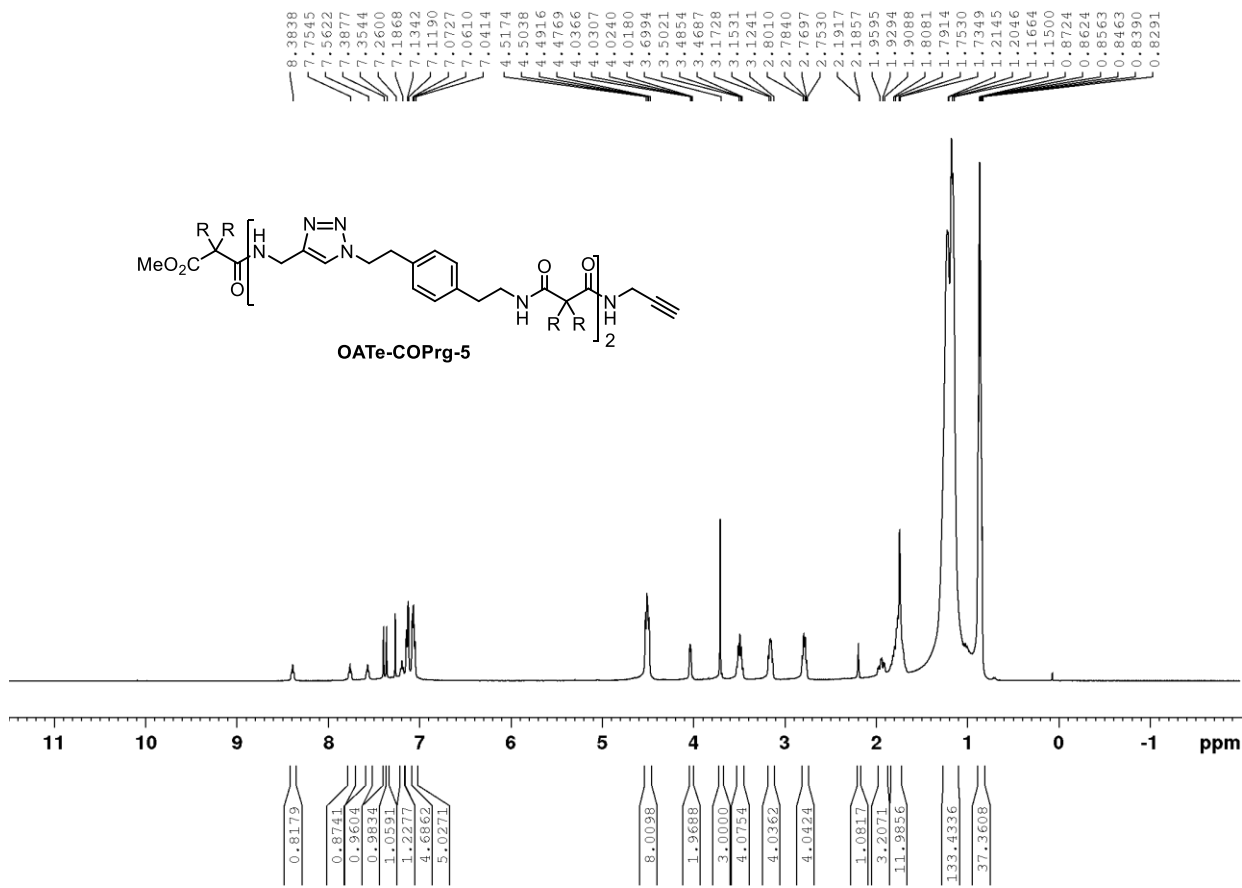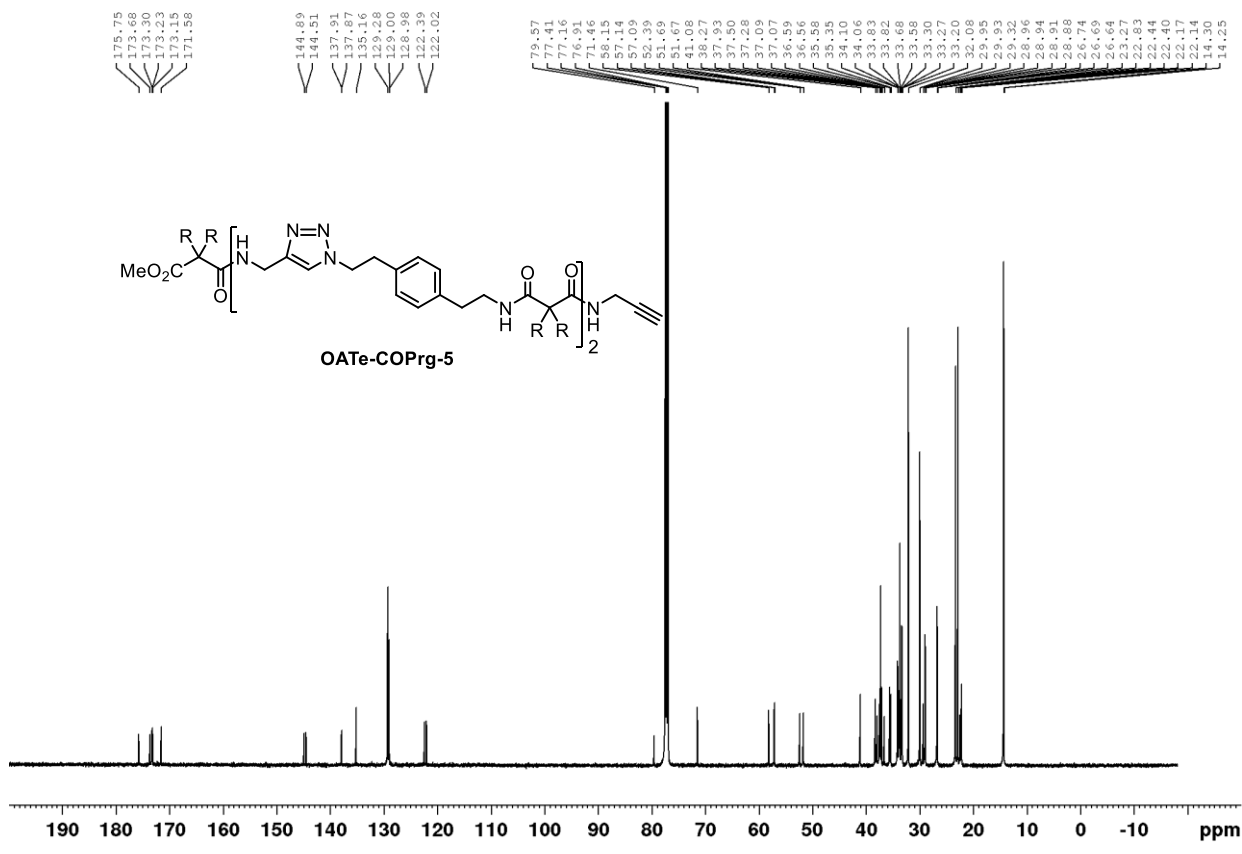

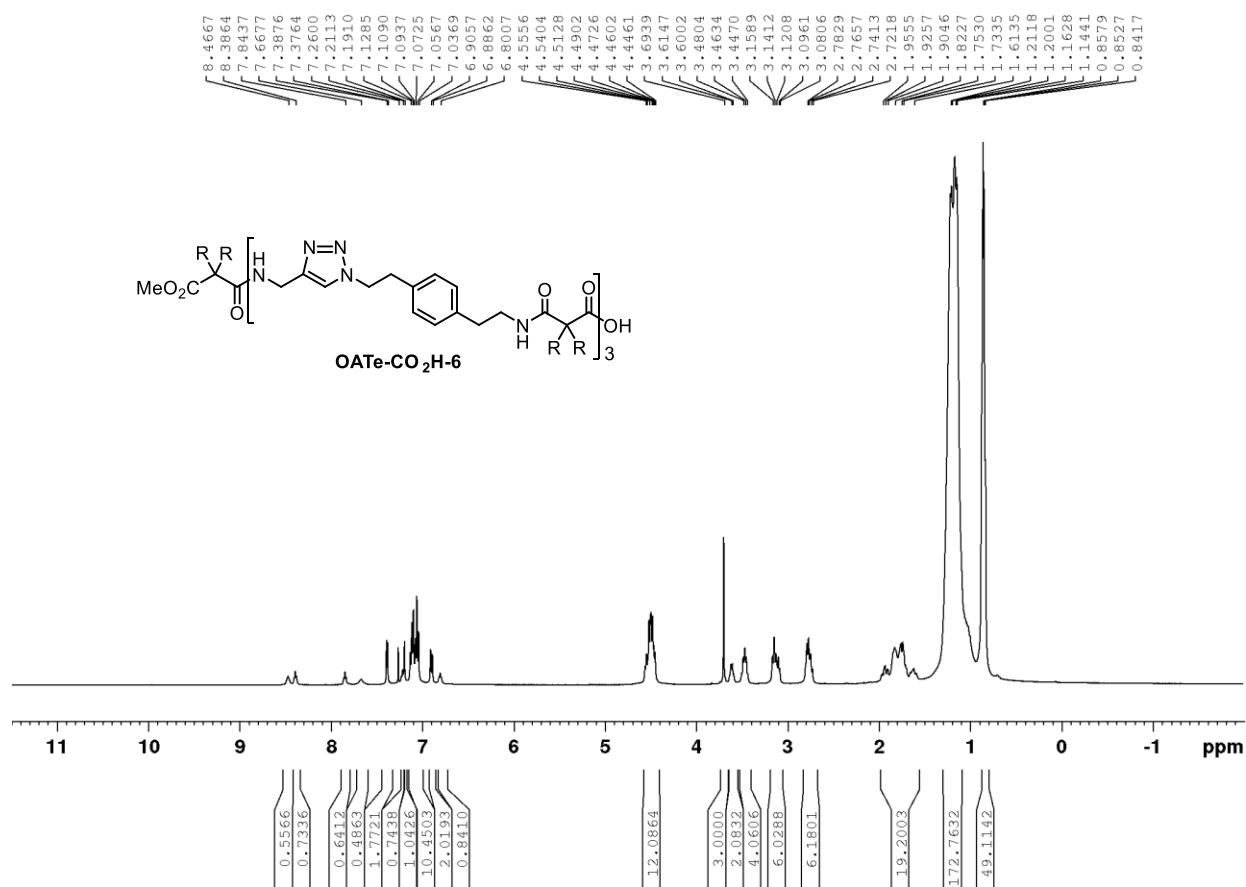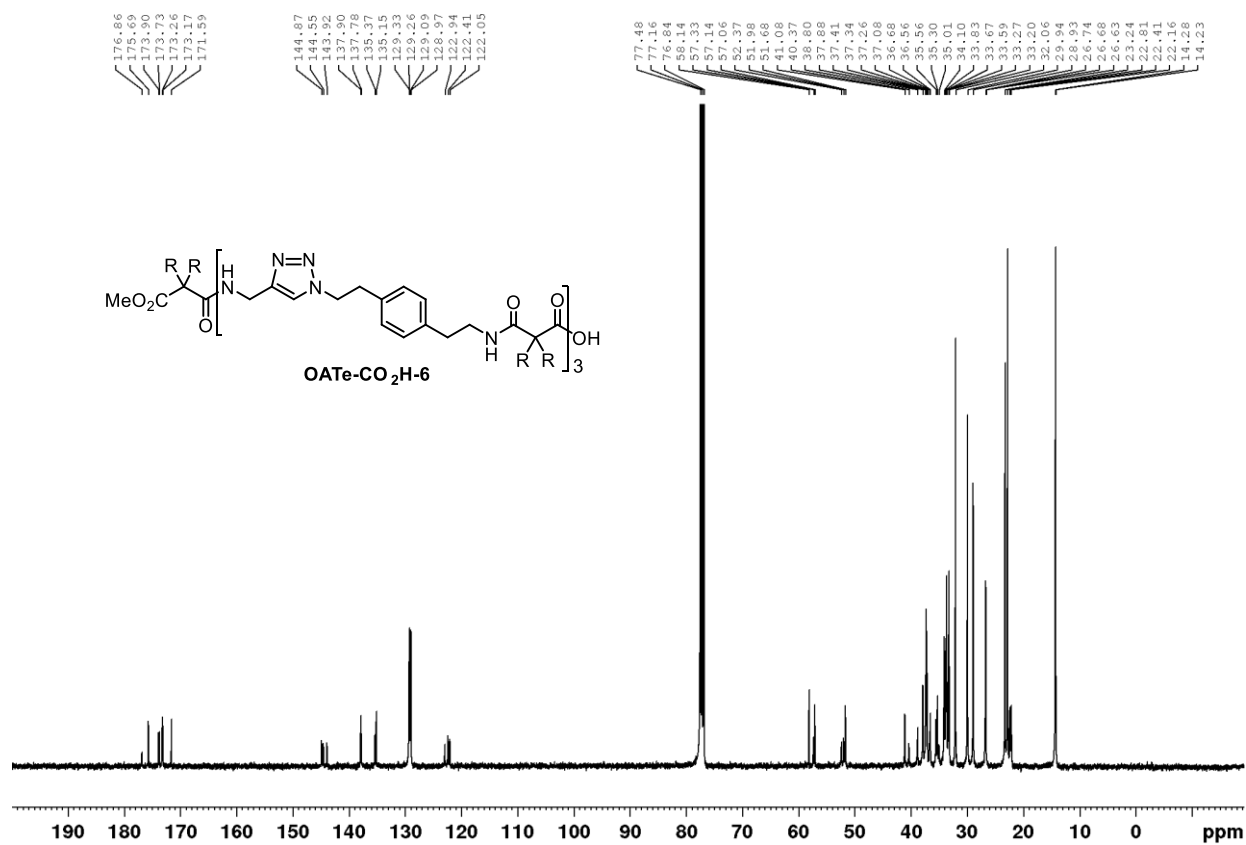

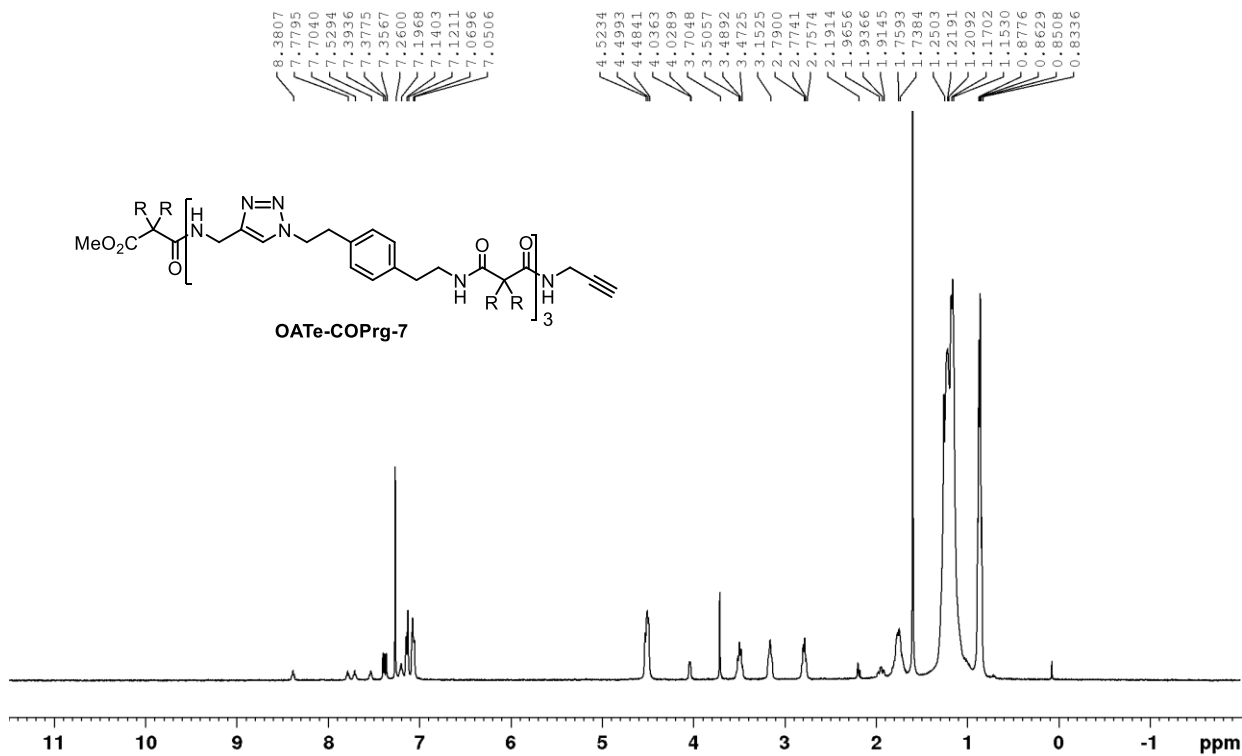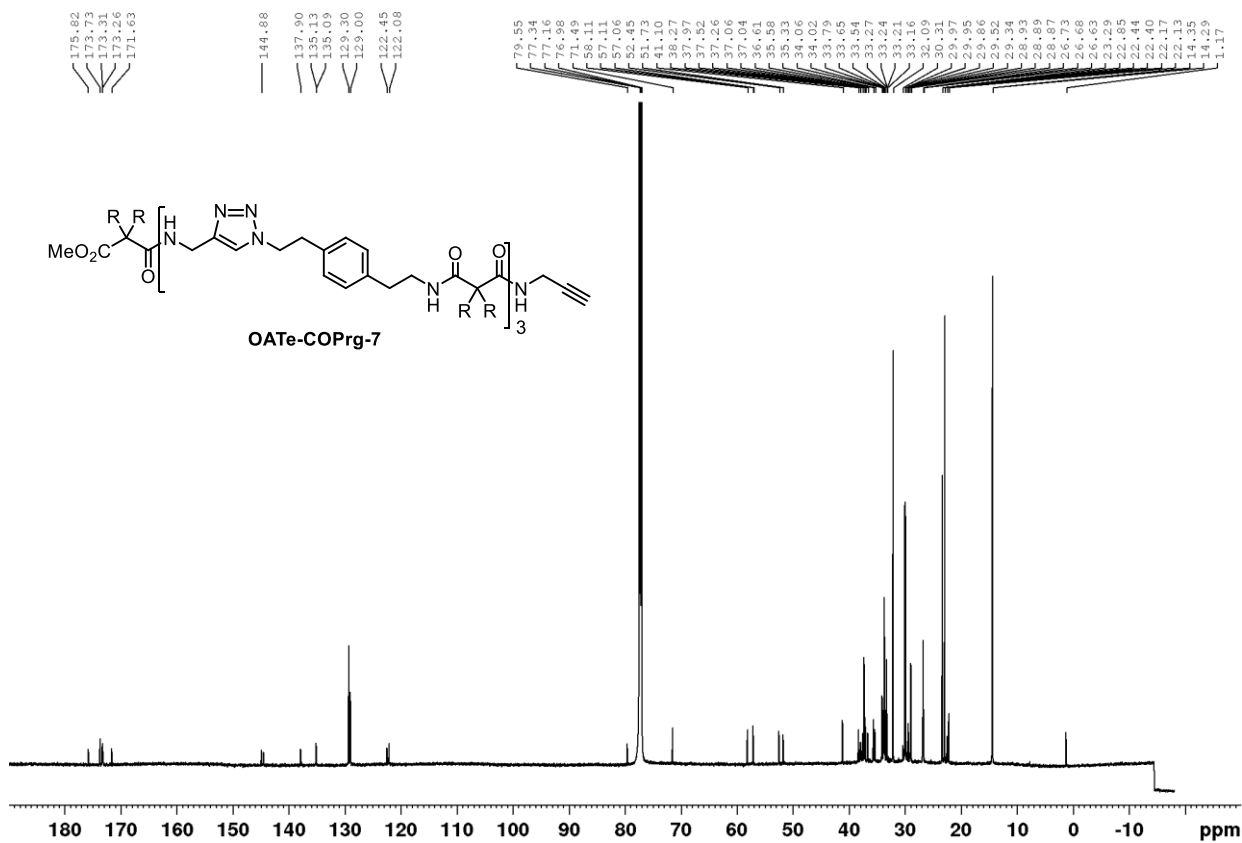

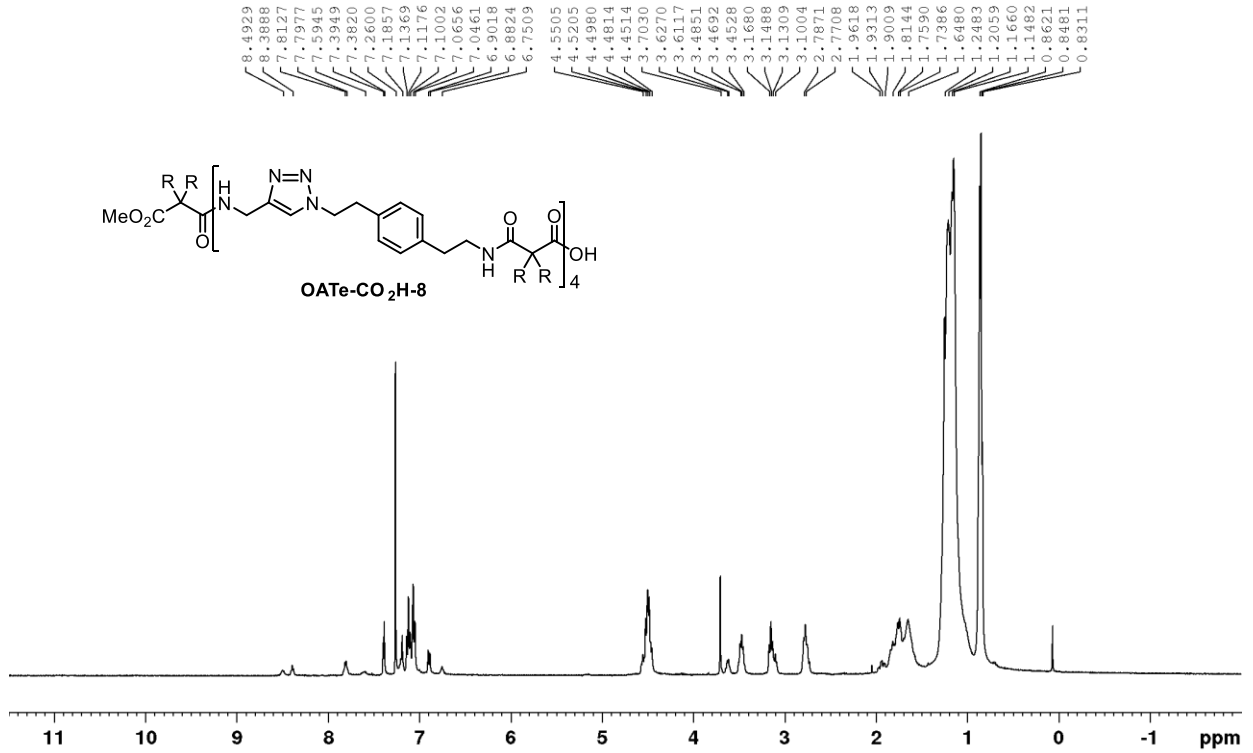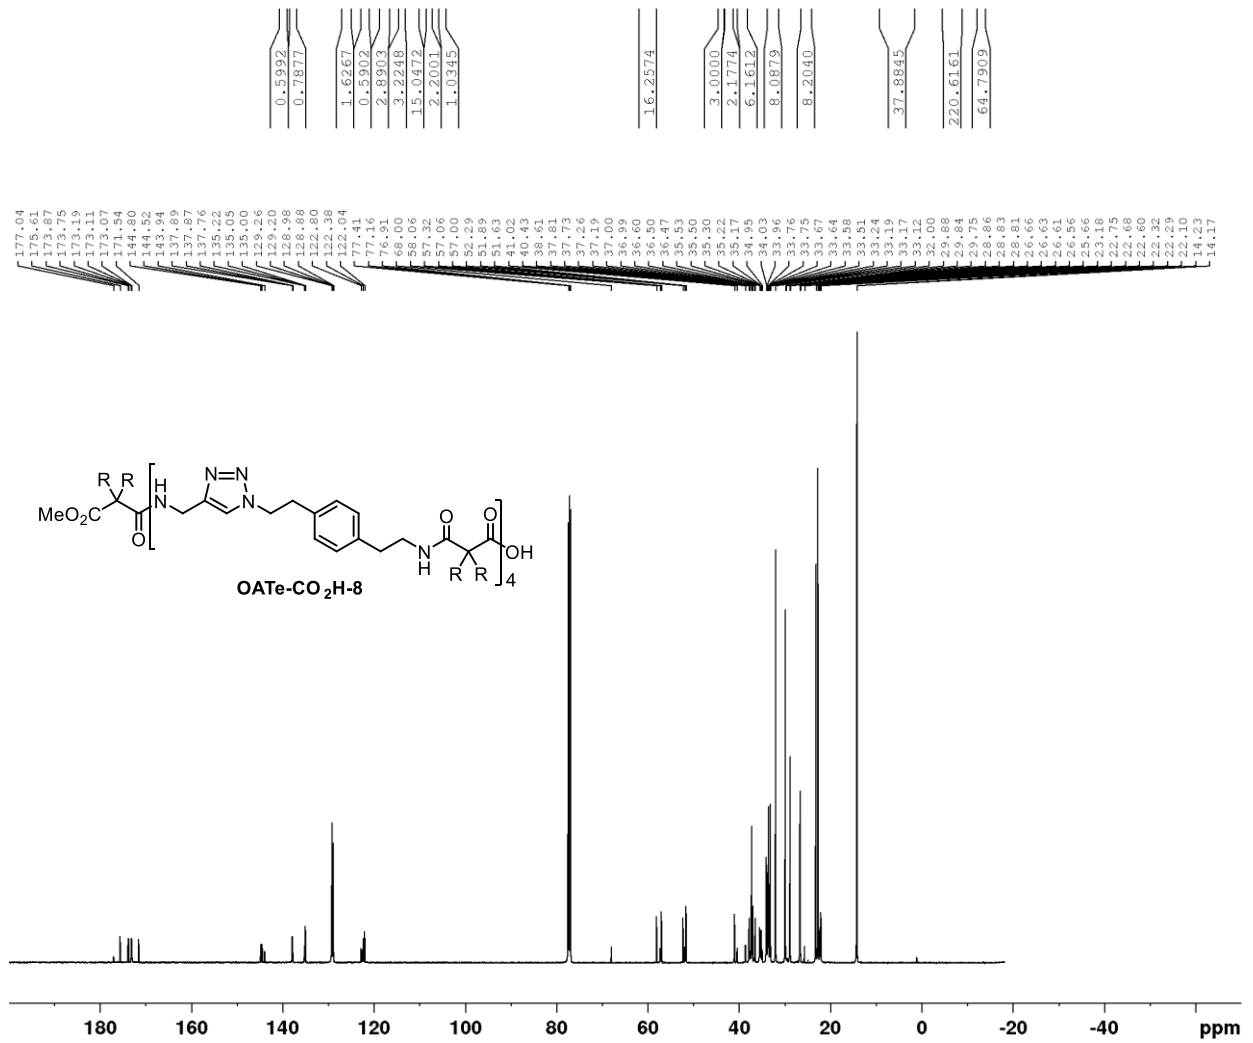

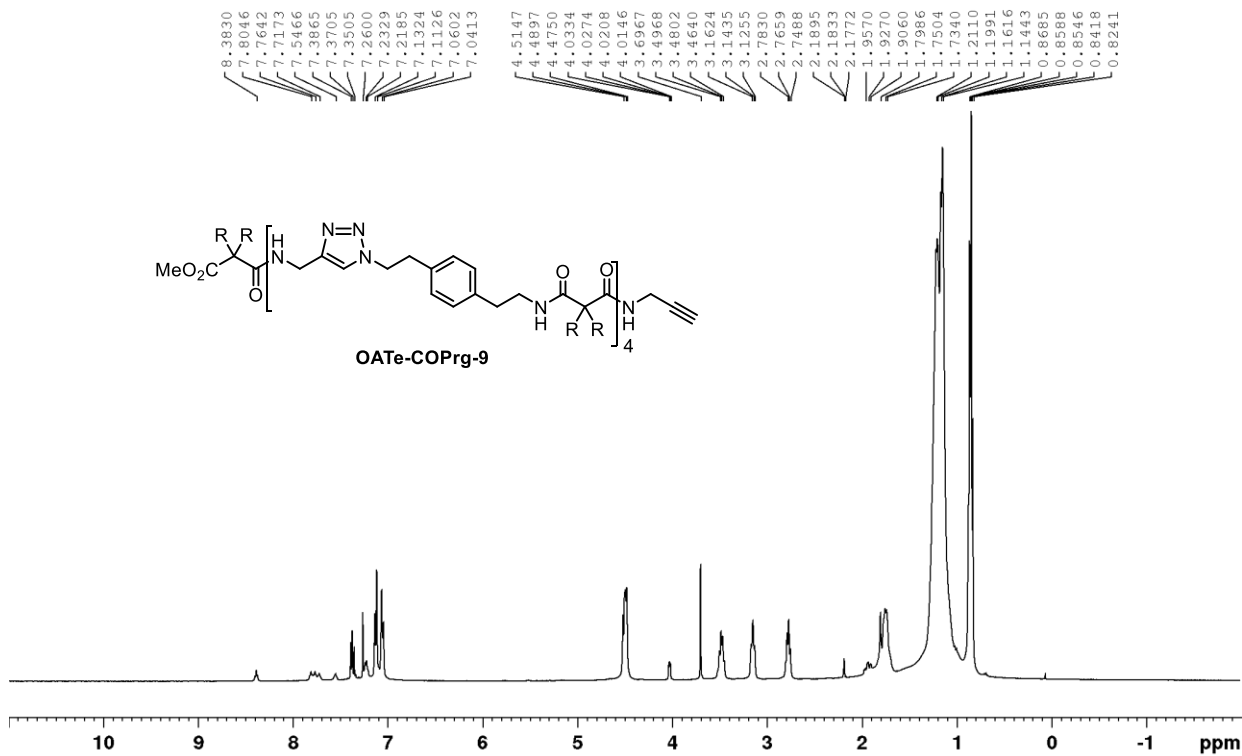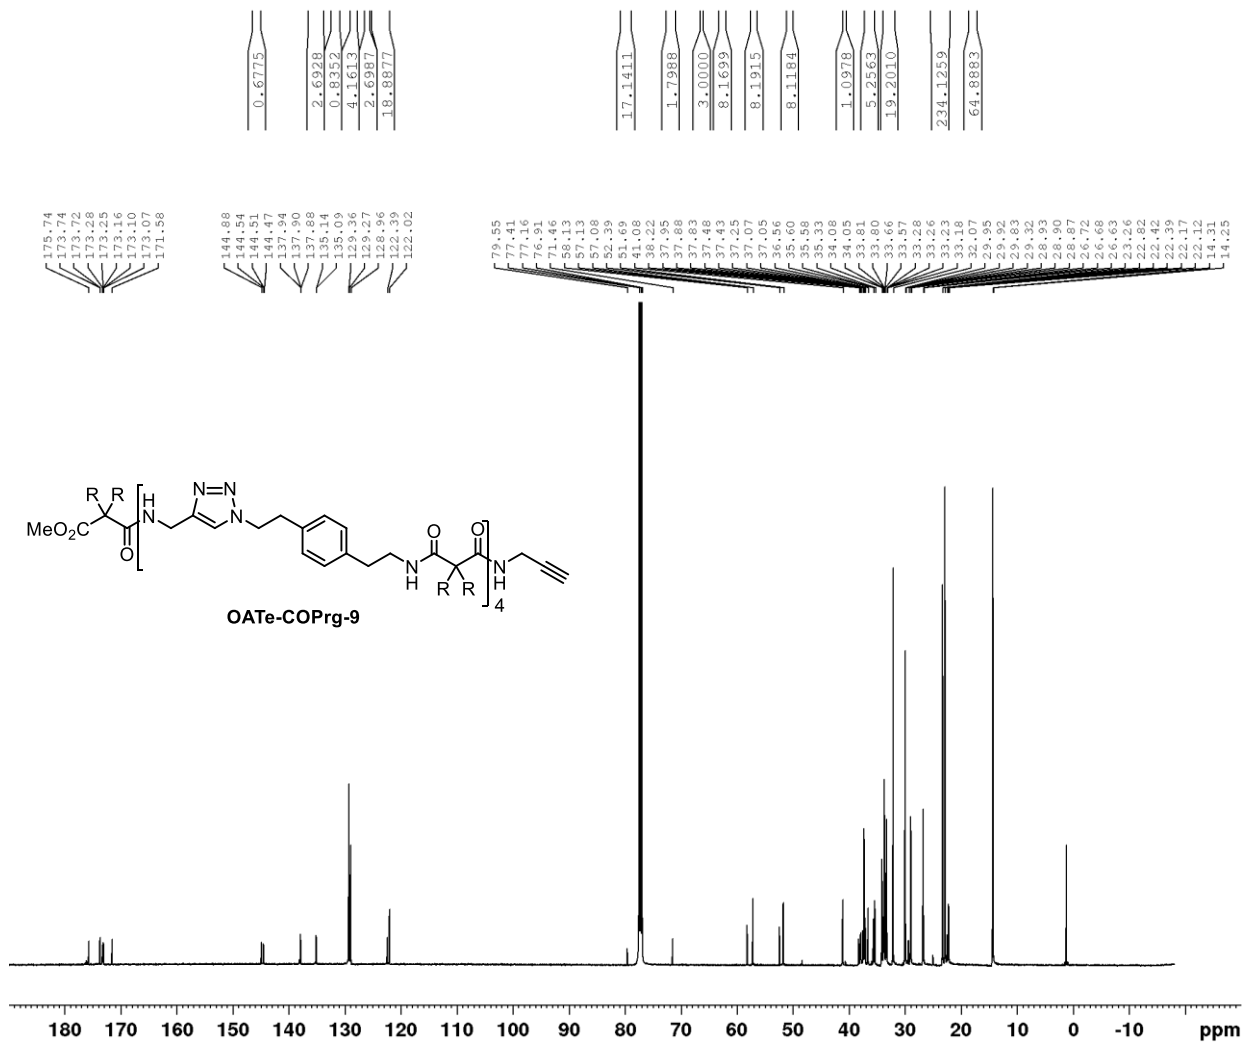

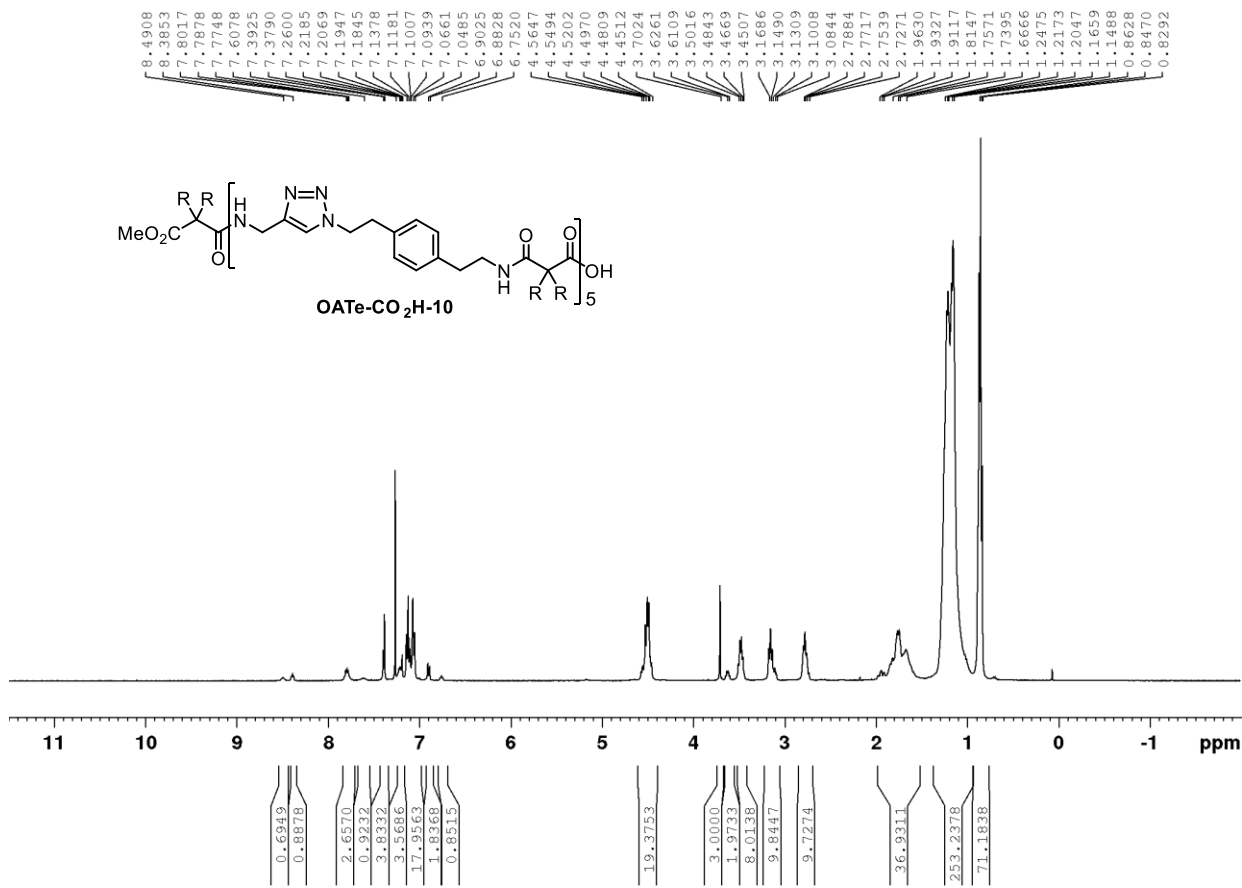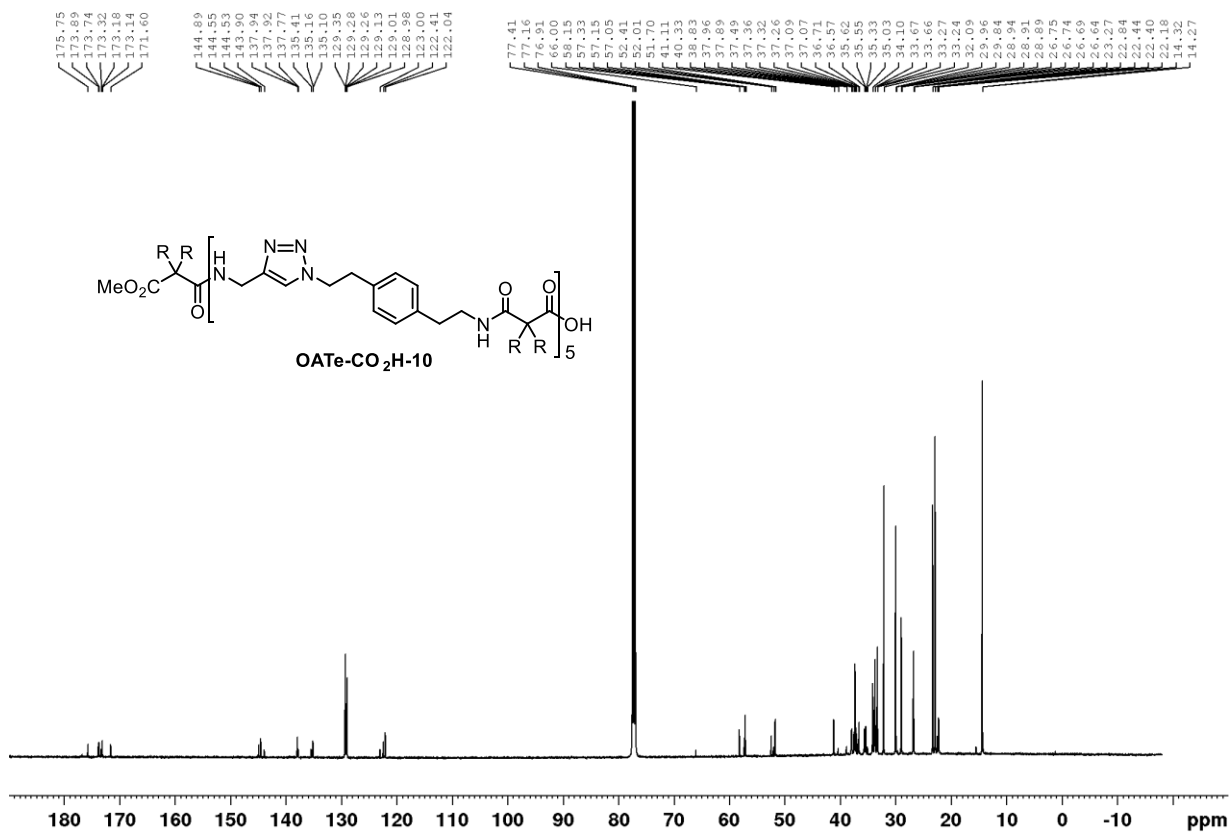



# Thermo QEFMS Analysis Report

## Analysis Info

|               |                                              |                |          |
|---------------|----------------------------------------------|----------------|----------|
| Sample Name : | C4C6-ene-OH                                  | Reference No.: | Wqhfc293 |
| Instrument :  | Q Exactive Focus Orbitrap                    |                |          |
| Source :      | HESI II                                      | Polarity :     | Negative |
| Comment :     | ESI neg, 3.0kV, by infusion, with sheath gas |                |          |

## Accurate Mass Measurement

|                          |                                   |
|--------------------------|-----------------------------------|
| Molecular formula :      | C <sub>14</sub> H <sub>28</sub> O |
| Experimental Mass [M-H]: | 211.20673                         |
| Theoretical Mass [M-H]:  | 211.20674                         |
| Error (ppm) :            | 0.0                               |

D:\Raw data\wqhfc293\_180518175544

05/18/18 17:55:44

C4C6-ene-OH

wqhfc293\_180518175544 #958 RT: 4.27 AV: 1 SB: 256 0.01-1.15 NL  
T: FTMS - p ESI Full ms [100.0000-800.0000]

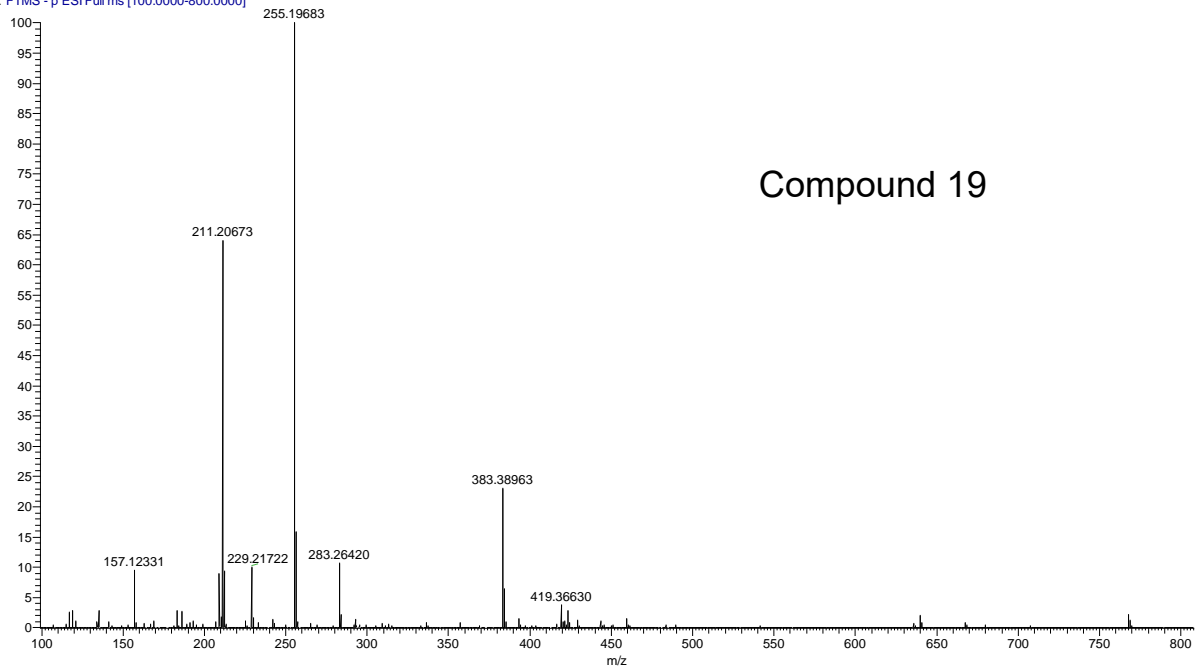

wqhfc293\_180518175544 #958 RT: 4.27 AV: 1 SB: 256 0.01-1.15 NL: 1.03E8  
T: FTMS - p ESI Full ms [100.0000-800.0000]

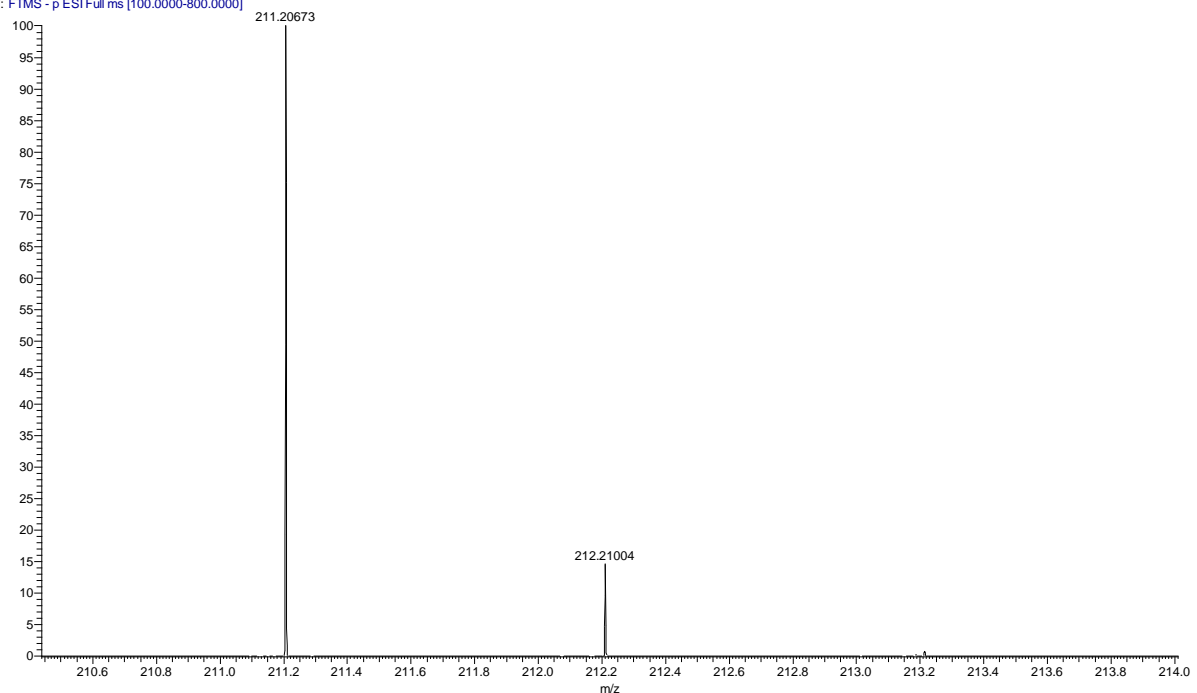

# Thermo QEFMS Analysis Report

## Analysis Info

|               |                                              |                |          |
|---------------|----------------------------------------------|----------------|----------|
| Sample Name : | M-ene-RR                                     | Reference No.: | Wqhfc294 |
| Instrument :  | Q Exactive Focus Orbitrap                    |                |          |
| Source :      | HESI II                                      | Polarity :     | positive |
| Comment :     | ESI pos, 3.5kV, by infusion, with sheath gas |                |          |

## Accurate Mass Measurement

|                                         |                                                |
|-----------------------------------------|------------------------------------------------|
| Molecular formula :                     | C <sub>34</sub> H <sub>60</sub> O <sub>4</sub> |
| Experimental Mass [M+Na] <sup>+</sup> : | 555.43786                                      |
| Theoretical Mass [M+Na] <sup>+</sup> :  | 555.43838                                      |
| Error (ppm) :                           | 0.9                                            |

D:\Raw data\wqhfc294\_180518171307

05/18/18 17:13:07

M-ene-RR

wqhfc294\_180518171307 #635-677 RT: 2.83-3.02 AV: 43 SB: 142 0.0  
T: FTMS + p ESI Full ms [100.0000-800.0000]

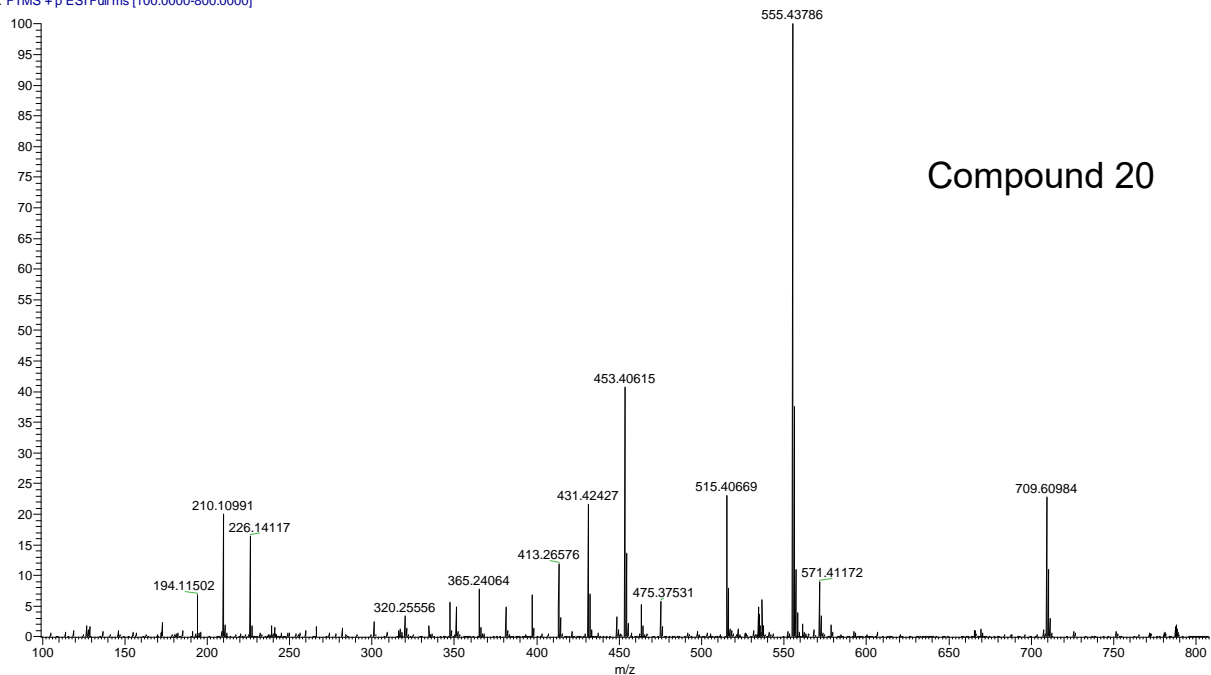

wqhfc294\_180518171307 #635-677 RT: 2.83-3.02 AV: 43 SB: 142 0.01-0.64 NL: 3.07E8  
T: FTMS + p ESI Full ms [100.0000-800.0000]

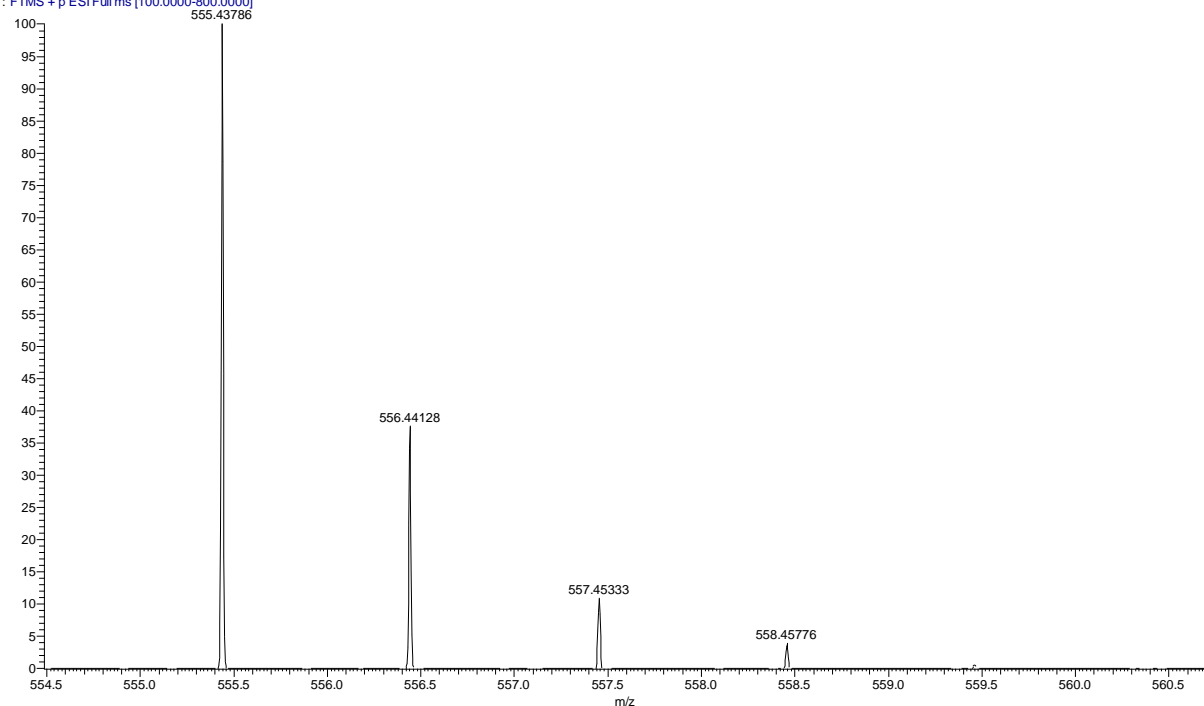

# Thermo QEFMS Analysis Report

## Analysis Info

|               |                                              |                |          |
|---------------|----------------------------------------------|----------------|----------|
| Sample Name : | M-RR                                         | Reference No.: | Wqhfc295 |
| Instrument :  | Q Exactive Focus Orbitrap                    |                |          |
| Source :      | HESI II                                      | Polarity :     | positive |
| Comment :     | ESI pos, 3.5kV, by infusion, with sheath gas |                |          |

## Accurate Mass Measurement

|                                         |                                                |
|-----------------------------------------|------------------------------------------------|
| Molecular formula :                     | C <sub>34</sub> H <sub>64</sub> O <sub>4</sub> |
| Experimental Mass [M+Na] <sup>+</sup> : | 559.46909                                      |
| Theoretical Mass [M+Na] <sup>+</sup> :  | 559.46968                                      |
| Error (ppm) :                           | 1.1                                            |

D:\Raw data\wqhfc295\_180518173305

05/18/18 17:33:05

M-RR

wqhfc295\_180518173305 #584-730 RT: 2.60-3.25 AV: 147 SB: 143 0.  
T: FTMS + p ESI Full ms [100.0000-800.0000]

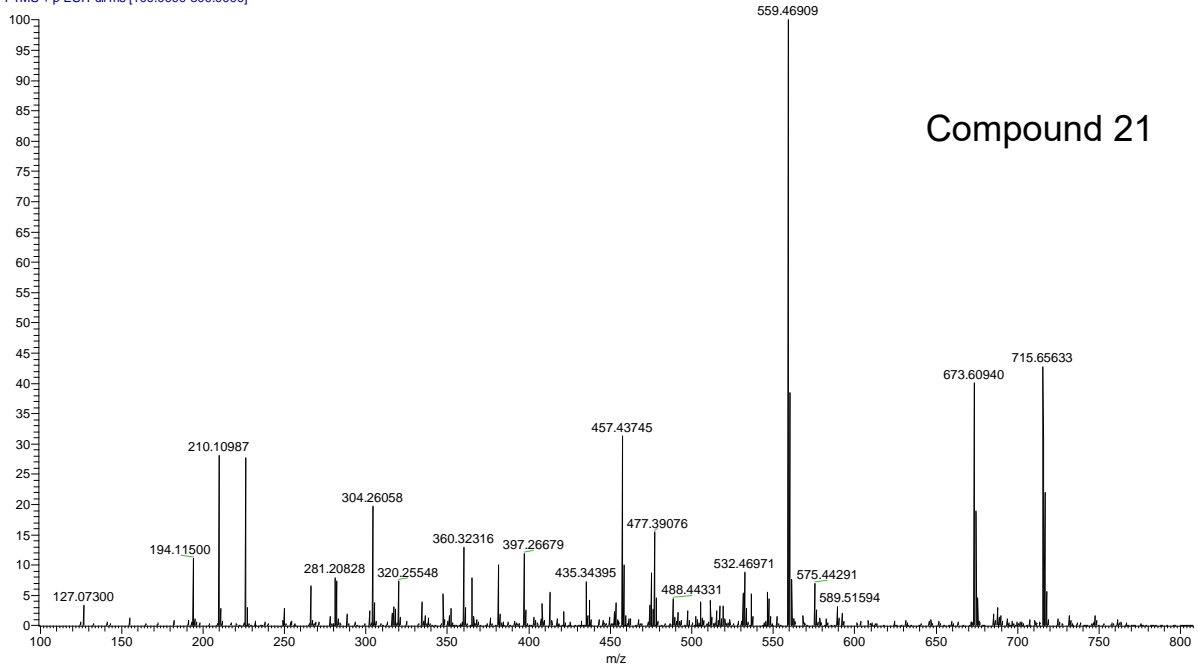

wqhfc295\_180518173305 #584-730 RT: 2.60-3.25 AV: 147 SB: 143 0.01-0.65 NL: 8.58E7  
T: FTMS + p ESI Full ms [100.0000-800.0000]

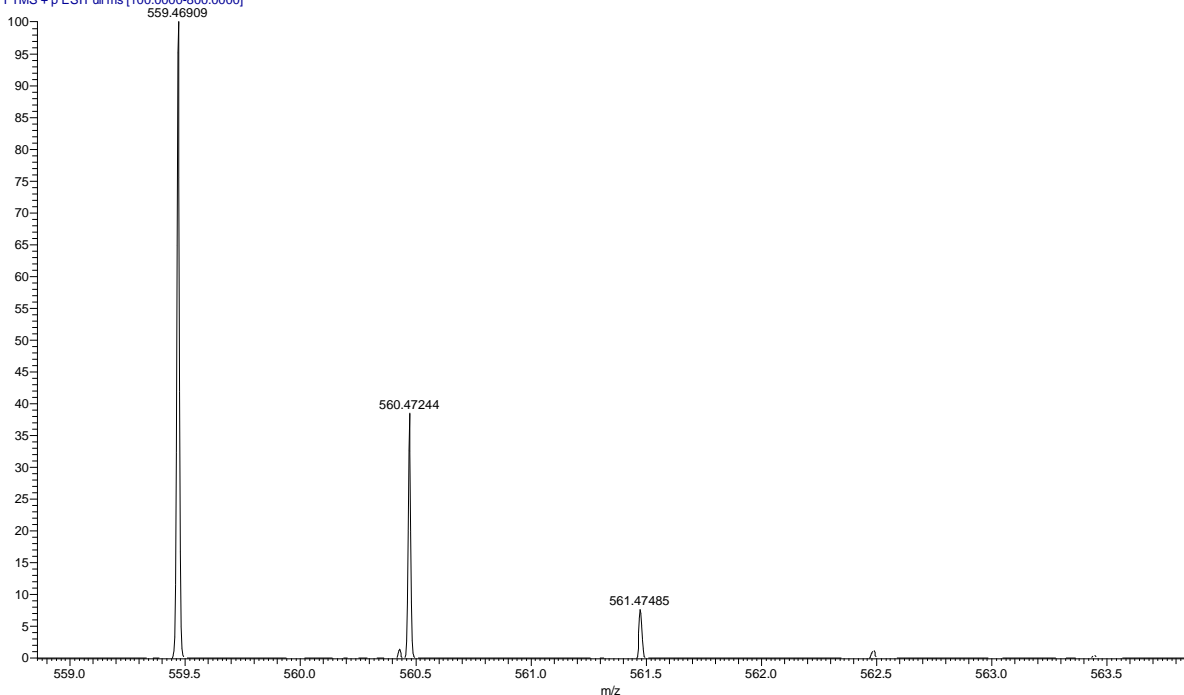

# Bruker 9.4T FTICR MS Analysis Report

Faculty of Science, The Chinese University of Hong Kong

## Analysis Info

|                  |                                       |                 |                    |
|------------------|---------------------------------------|-----------------|--------------------|
| Sample Name :    | RRCOOHCOOMe                           | Reference No. : | xhfc039            |
| Applicant Name : | Qi Qiuli                              | Analysis Date : | 25/1/2016 13:00:09 |
| Analysis Path :  | xhfc039_000001.d                      |                 |                    |
| Instrument :     | solarix                               | Polarity        | Positive           |
| Method           | 4_17_mass_range_pos_7T                | Acquired Scans  | 16                 |
| Comment :        | 4.4kV, 4ul/min, 0.8 bar nebulizer gas |                 |                    |

## Accurate Mass Measurement

|                                                       |            |
|-------------------------------------------------------|------------|
| Molecular formula :                                   | C32H62O4   |
| Abundant Isotopic (theoretical) [M+Na] <sup>+</sup> : | 533.454032 |
| Monoisotopic (theoretical) [M+Na] <sup>+</sup> :      | 533.454032 |
| (experimental) [M+Na] <sup>+</sup> :                  | 533.45512  |
| error (ppm) :                                         | 2.0        |

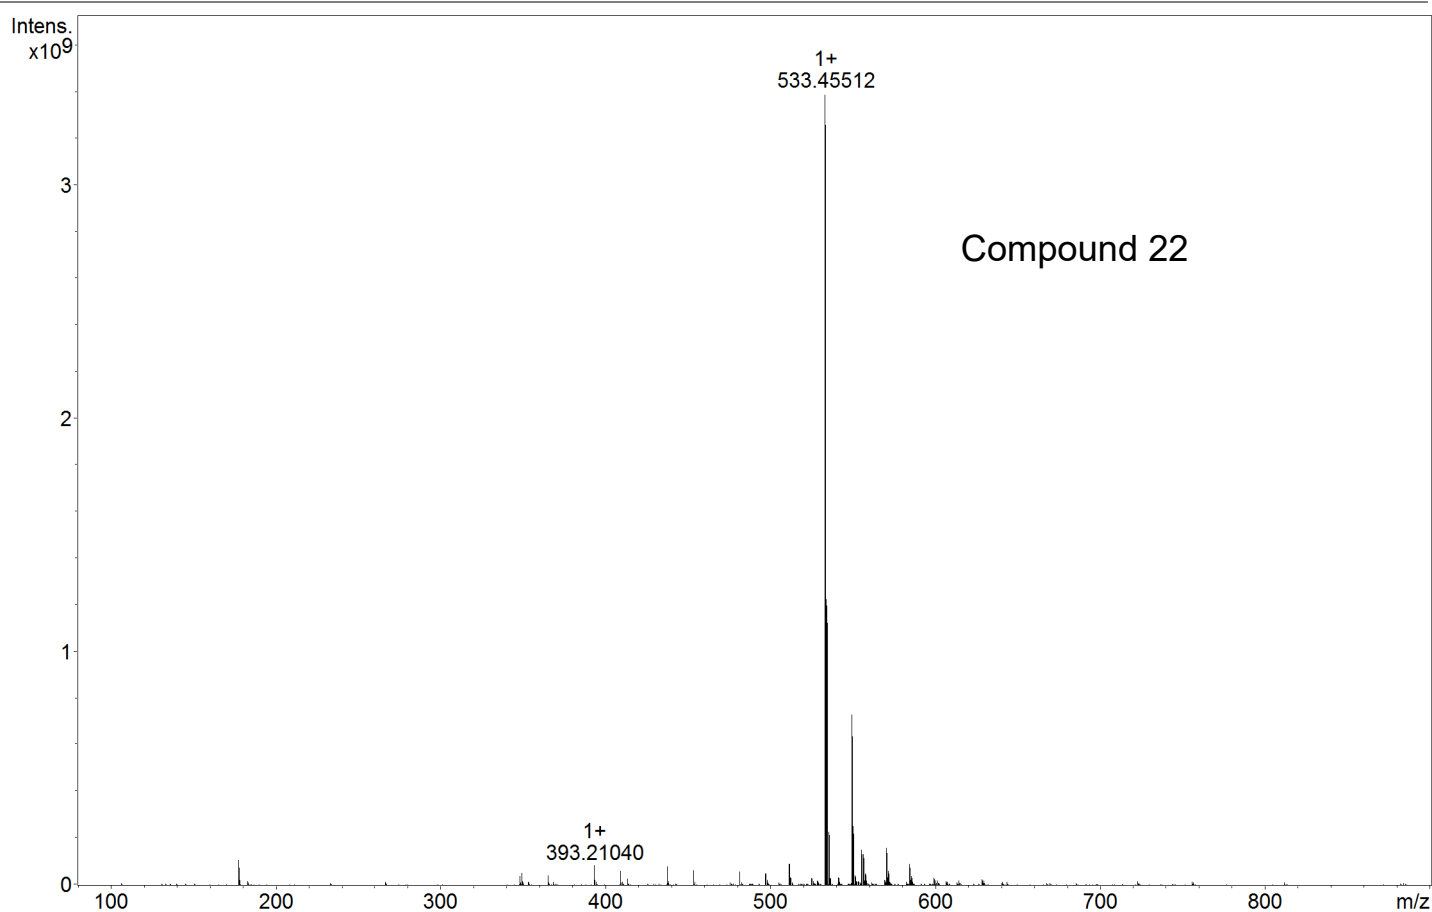

# Bruker 9.4T FTICR MS Analysis Report

Faculty of Science, The Chinese University of Hong Kong

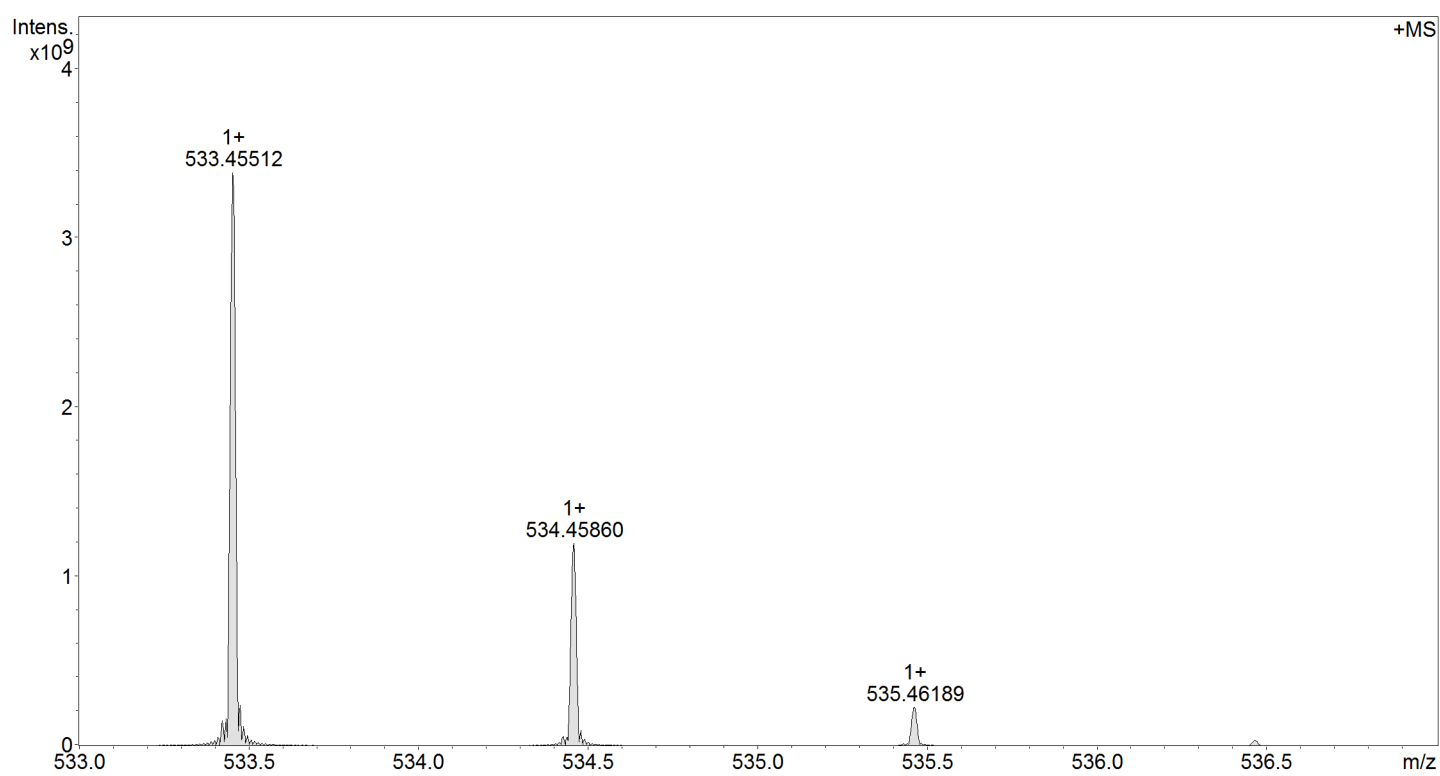

# Bruker 9.4T FTICR MS Analysis Report

Faculty of Science, The Chinese University of Hong Kong

## Analysis Info

|                  |                                                   |                 |                    |
|------------------|---------------------------------------------------|-----------------|--------------------|
| Sample Name :    | RRC3                                              | Reference No. : | xhfc061            |
| Applicant Name : | Zheng Kun                                         | Analysis Date : | 11/3/2016 12:43:18 |
| Analysis Path :  | xhfc061_000002.d                                  |                 |                    |
| Instrument :     | solarix                                           | Polarity        | Positive           |
| Method           | 4_17_mass_range_pos_7T                            | Acquired Scans  | 11                 |
| Comment :        | 4.5kV, 140ul/hr, 1.0 bar nebulizer gas, TOF = 0.9 |                 |                    |

## Accurate Mass Measurement

|                                                       |            |
|-------------------------------------------------------|------------|
| Molecular formula :                                   | C35H65NO3  |
| Abundant Isotopic (theoretical) [M+Na] <sup>+</sup> : | 570.485666 |
| Monoisotopic (theoretical) [M+Na] <sup>+</sup> :      | 570.485666 |
| (experimental) [M+Na] <sup>+</sup> :                  | 570.48668  |
| error (ppm) :                                         | 1.6        |

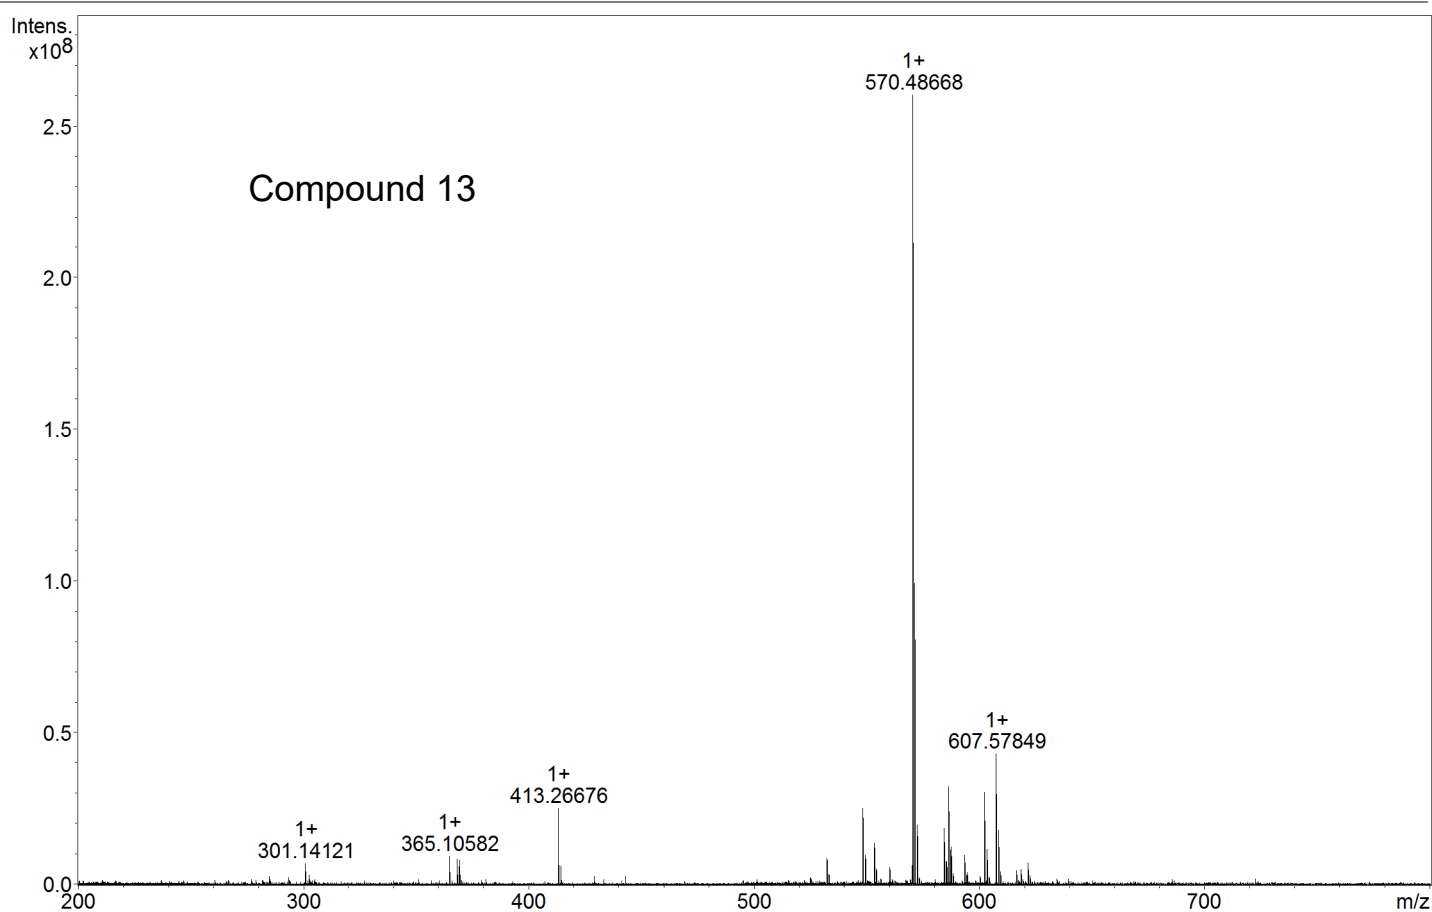

# Bruker 9.4T FTICR MS Analysis Report

Faculty of Science, The Chinese University of Hong Kong

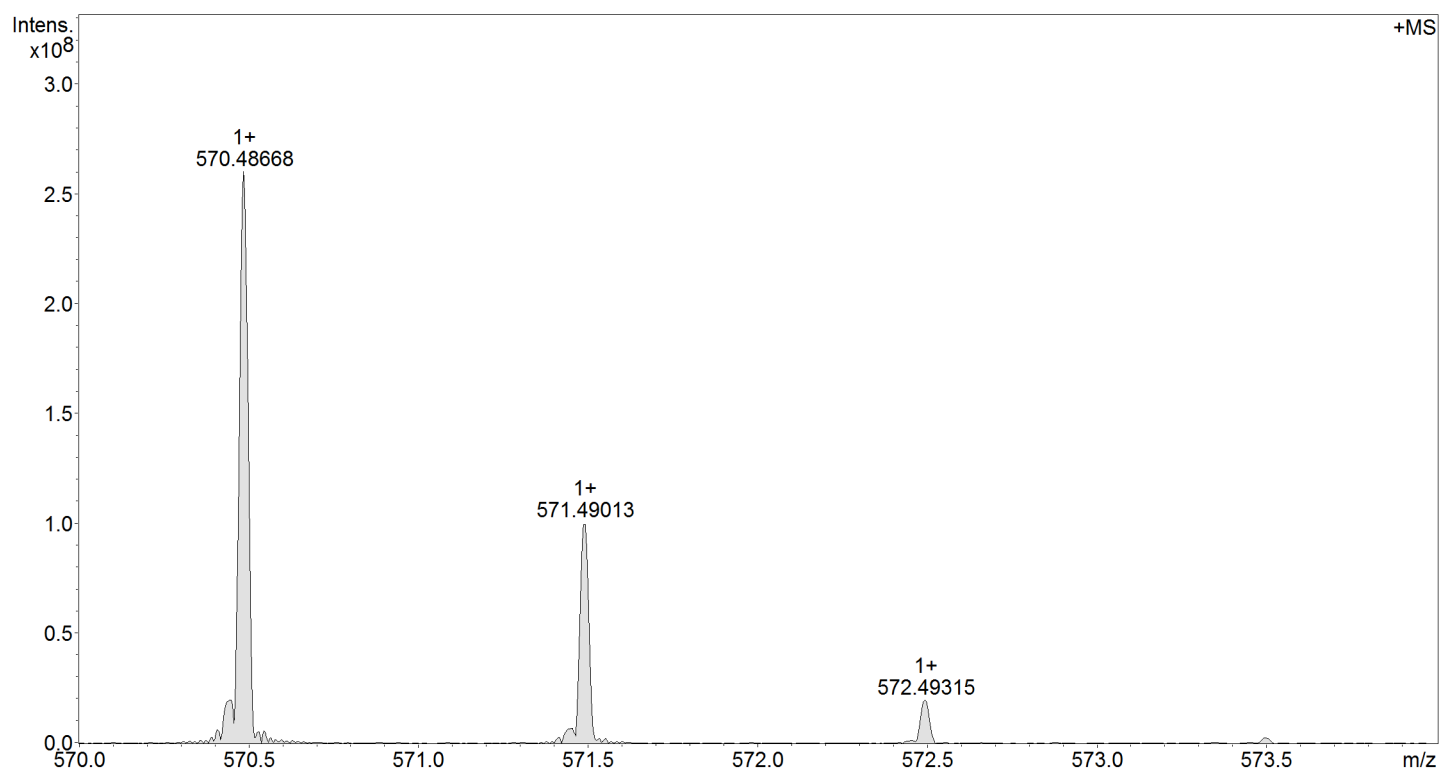

# Bruker 9.4T FTICR MS Analysis Report

Faculty of Science, The Chinese University of Hong Kong

## Analysis Info

|                  |                                                   |                 |                    |
|------------------|---------------------------------------------------|-----------------|--------------------|
| Sample Name :    | RRC3COOH                                          | Reference No. : | xhfc059            |
| Applicant Name : | Zheng Kun                                         | Analysis Date : | 11/3/2016 12:12:17 |
| Analysis Path :  | xhfc059_000002.d                                  |                 |                    |
| Instrument :     | solarix                                           | Polarity        | Positive           |
| Method           | 4_17_mass_range_pos_7T                            | Acquired Scans  | 9                  |
| Comment :        | 4.5kV, 140ul/hr, 1.0 bar nebulizer gas, TOF = 0.9 |                 |                    |

## Accurate Mass Measurement

|                                                       |            |
|-------------------------------------------------------|------------|
| Molecular formula :                                   | C34H63NO3  |
| Abundant Isotopic (theoretical) [M+Na] <sup>+</sup> : | 556.470016 |
| Monoisotopic (theoretical) [M+Na] <sup>+</sup> :      | 556.470016 |
| (experimental) [M+Na] <sup>+</sup> :                  | 556.47188  |
| error (ppm) :                                         | 3.3        |

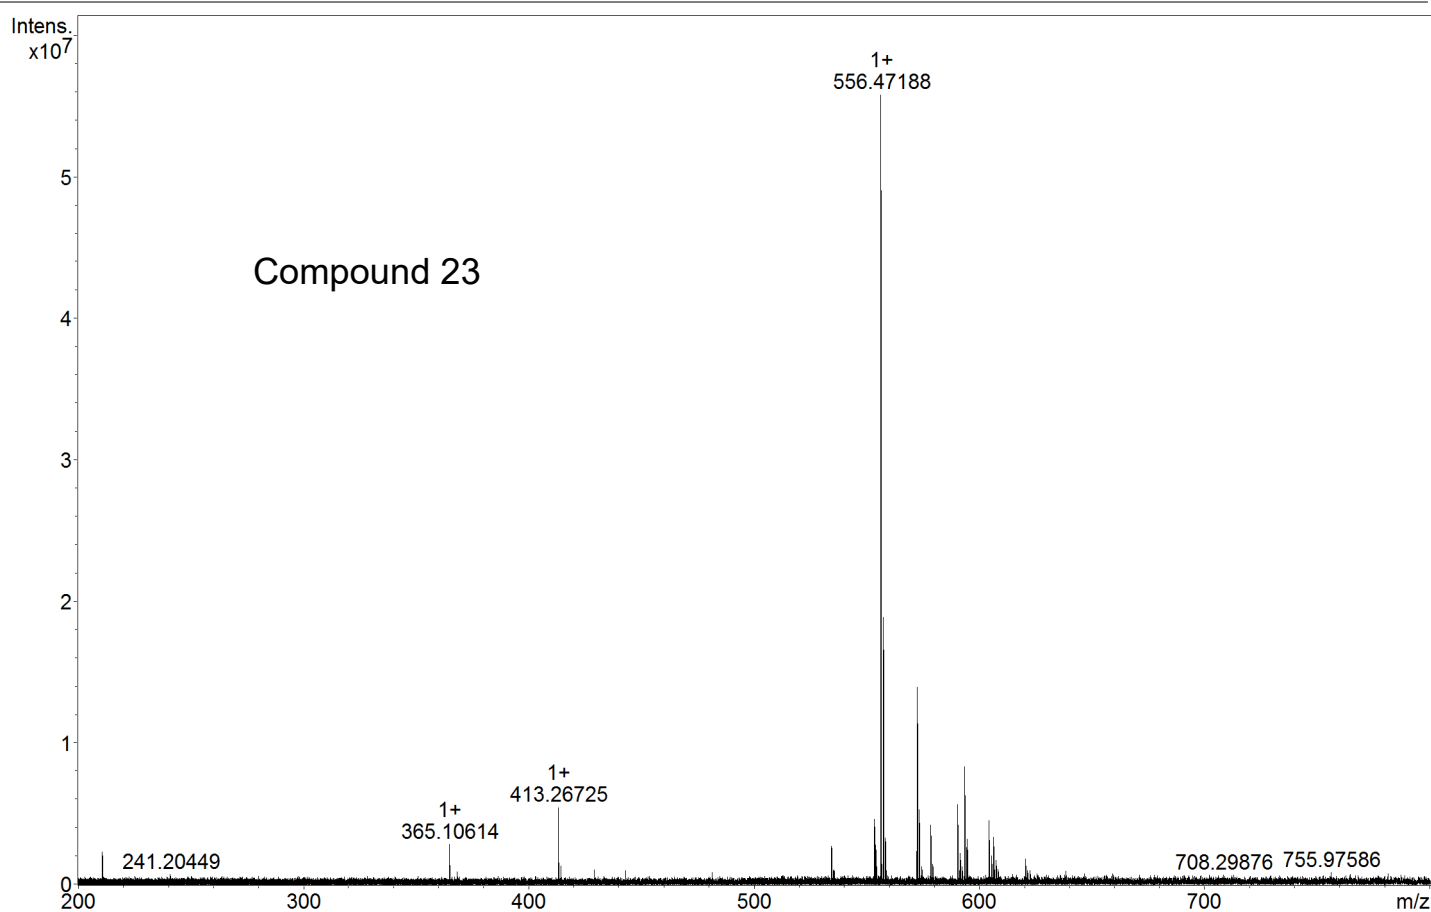



# Bruker 9.4T FTICR MS Analysis Report

Faculty of Science, The Chinese University of Hong Kong

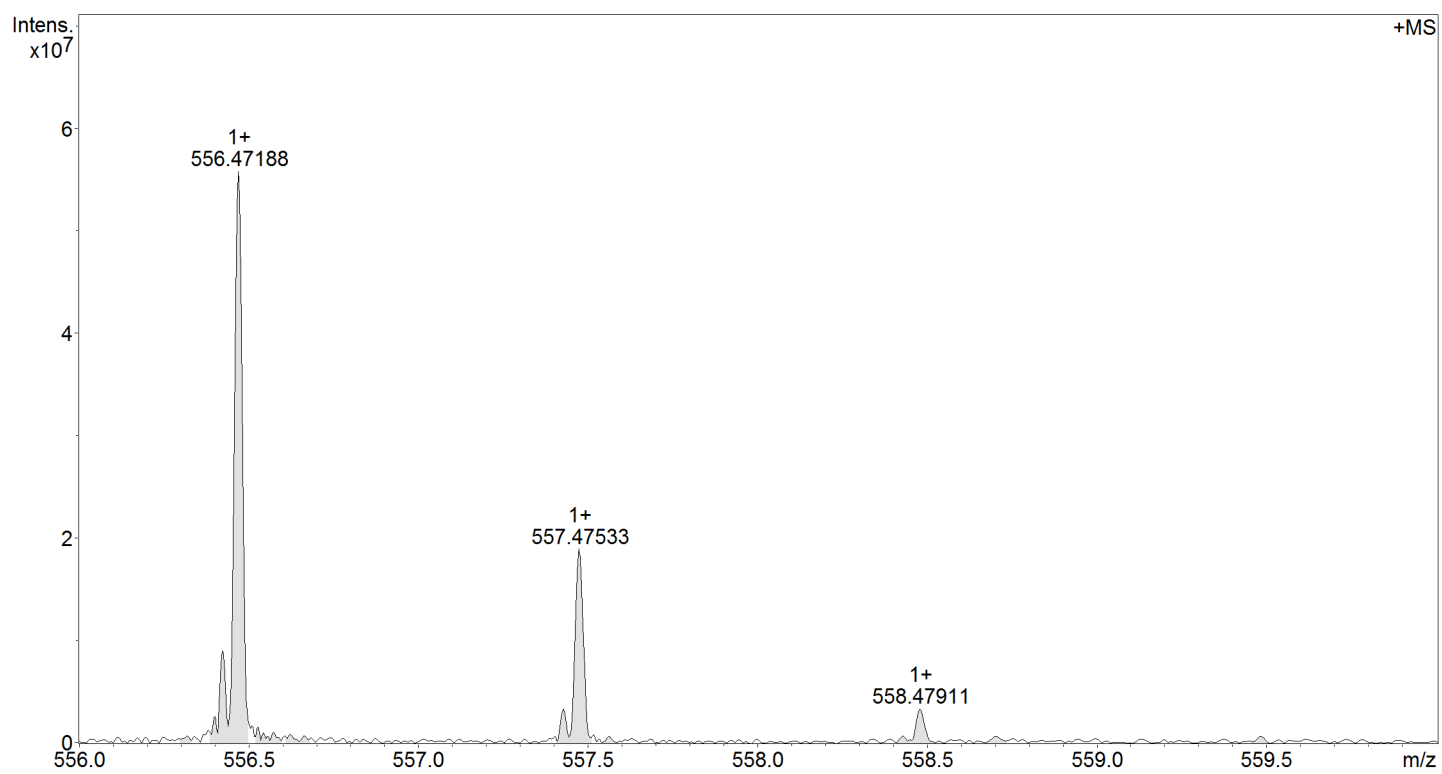

# Bruker 9.4T FTICR MS Analysis Report

Faculty of Science, The Chinese University of Hong Kong

## Analysis Info

|                  |                                                   |                 |                    |
|------------------|---------------------------------------------------|-----------------|--------------------|
| Sample Name :    | RRBenN3                                           | Reference No. : | xhfc060            |
| Applicant Name : | Zheng Kun                                         | Analysis Date : | 11/3/2016 12:26:29 |
| Analysis Path :  | xhfc060_000004.d                                  |                 |                    |
| Instrument :     | solarix                                           | Polarity        | Positive           |
| Method           | 4_17_mass_range_pos_7T                            | Acquired Scans  | 11                 |
| Comment :        | 4.5kV, 140ul/hr, 1.0 bar nebulizer gas, TOF = 0.9 |                 |                    |

## Accurate Mass Measurement

|                                                       |            |
|-------------------------------------------------------|------------|
| Molecular formula :                                   | C40H70N4O3 |
| Abundant Isotopic (theoretical) [M+Na] <sup>+</sup> : | 677.534013 |
| Monoisotopic (theoretical) [M+Na] <sup>+</sup> :      | 677.534013 |
| (experimental) [M+Na] <sup>+</sup> :                  | 677.53567  |
| error (ppm) :                                         | 2.4        |

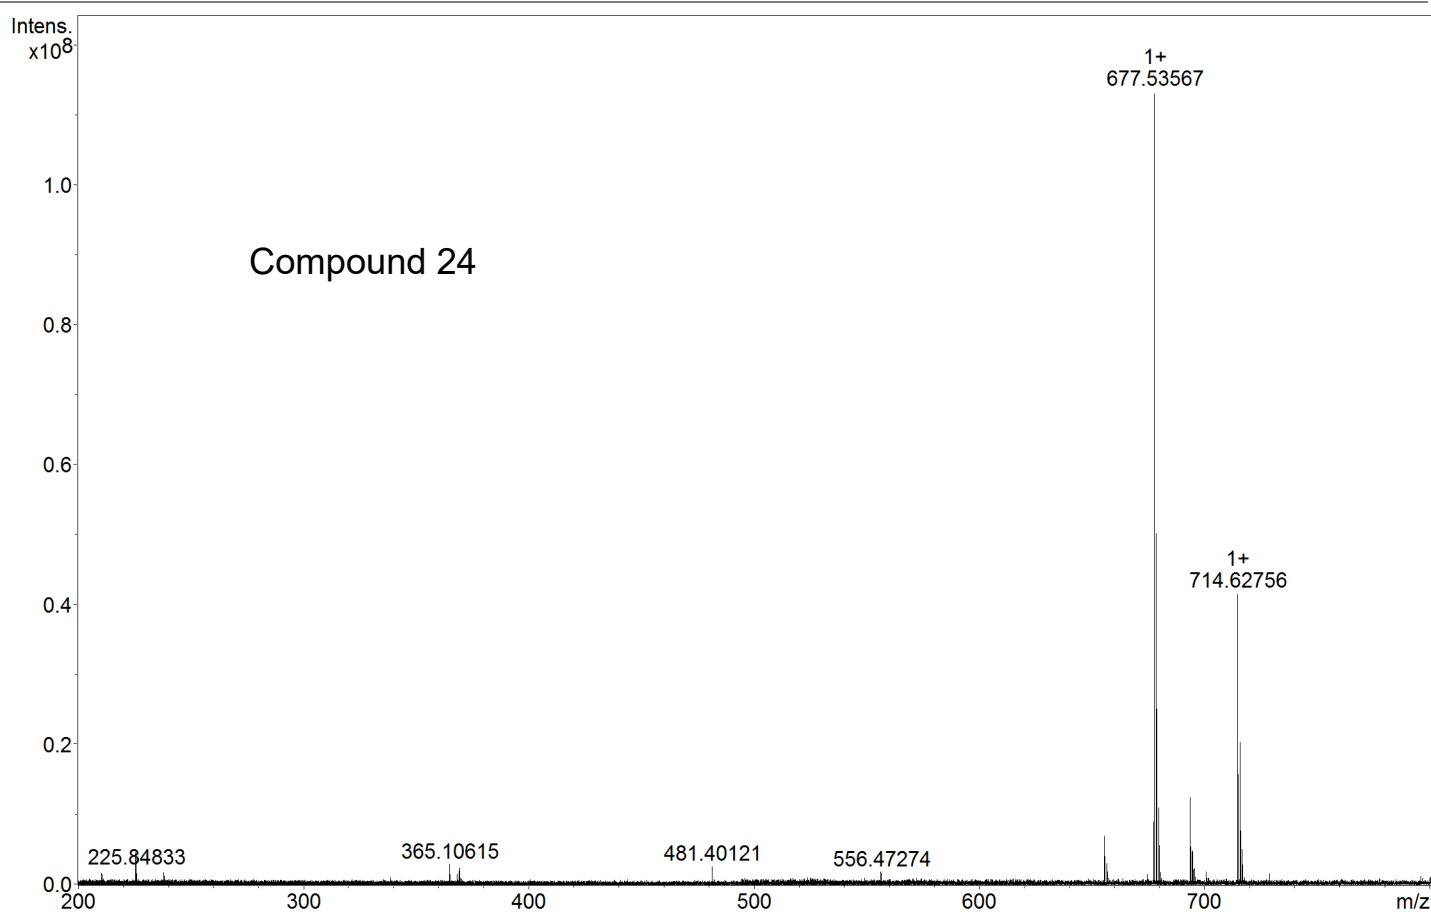

# Bruker 9.4T FTICR MS Analysis Report

Faculty of Science, The Chinese University of Hong Kong

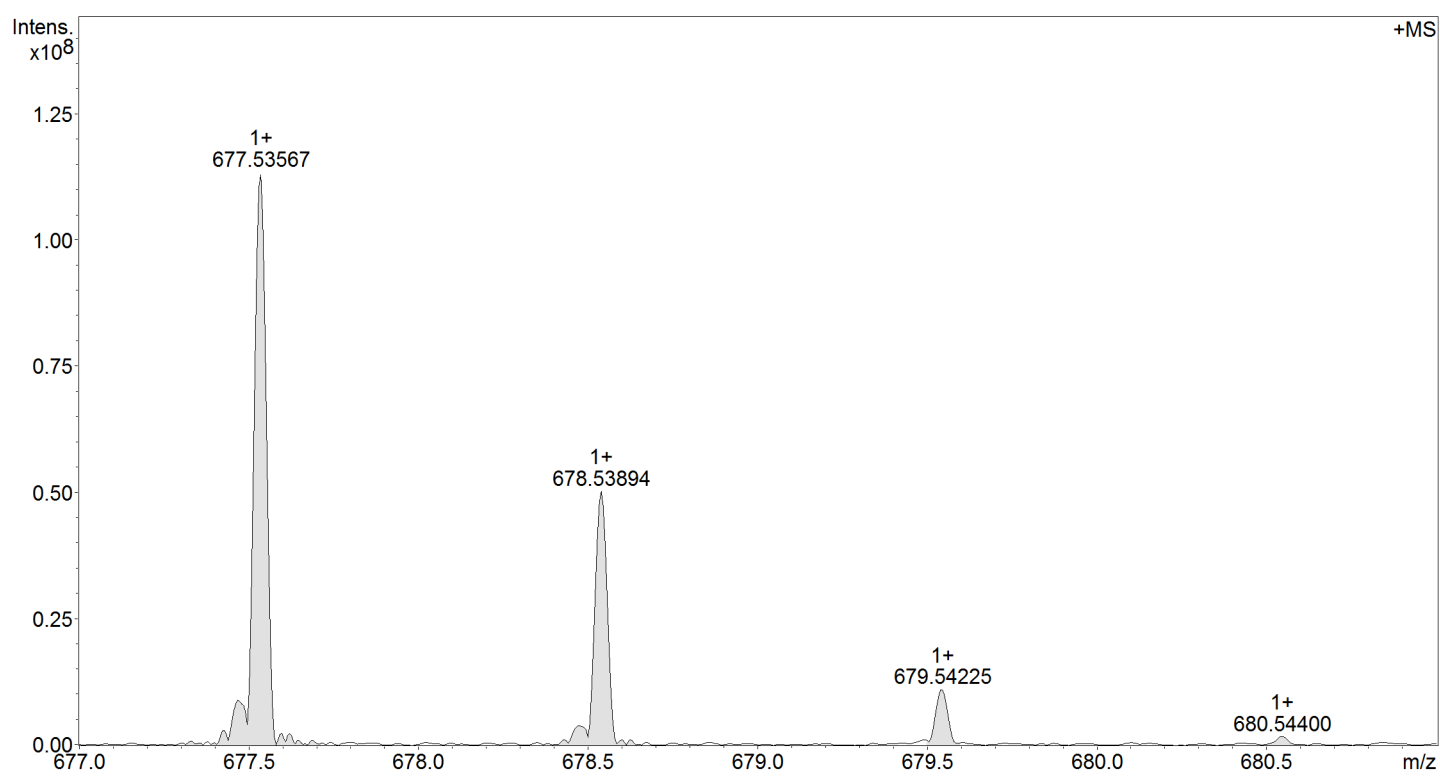

# Thermo QEFMS Analysis Report

## Analysis Info

|               |                                        |                |          |
|---------------|----------------------------------------|----------------|----------|
| Sample Name : | Zk-BenN3COOH                           | Reference No.: | Qhfc076  |
| Instrument :  | Q Exactive Focus Orbitrap              |                |          |
| Source :      | HESI II                                | Polarity :     | Negative |
| Comment :     | ESI neg, 3.0kV, by LC, with sheath gas |                |          |

## Accurate Mass Measurement

|                          |                                                               |
|--------------------------|---------------------------------------------------------------|
| Molecular formula :      | C <sub>39</sub> H <sub>68</sub> N <sub>4</sub> O <sub>3</sub> |
| Experimental Mass [M-H]: | 639.52185                                                     |
| Theoretical Mass [M-H]:  | 639.52187                                                     |
| Error (ppm) :            | 0.0                                                           |

D:\Raw data\qhf076

07/24/17 18:08:50

zk-BenN3COOH

qhf076 #71 RT: 0.33 AV: 1 SB: 210 0.08-0.26, 0.67-1.43 NL: 1.45E8  
T: FTMS - p ESI Full ms [300.0000-3000.0000]

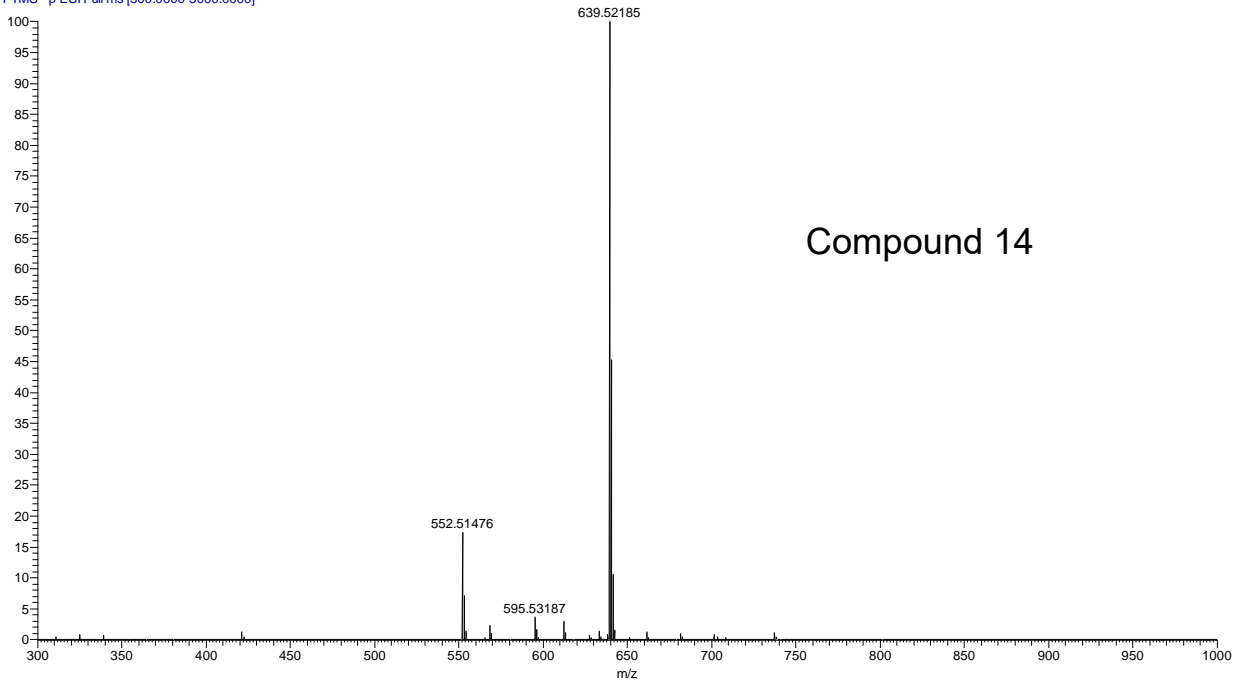

qhf076 #71 RT: 0.33 AV: 1 SB: 210 0.08-0.26, 0.67-1.43 NL: 1.45E8  
T: FTMS - p ESI Full ms [300.0000-3000.0000]

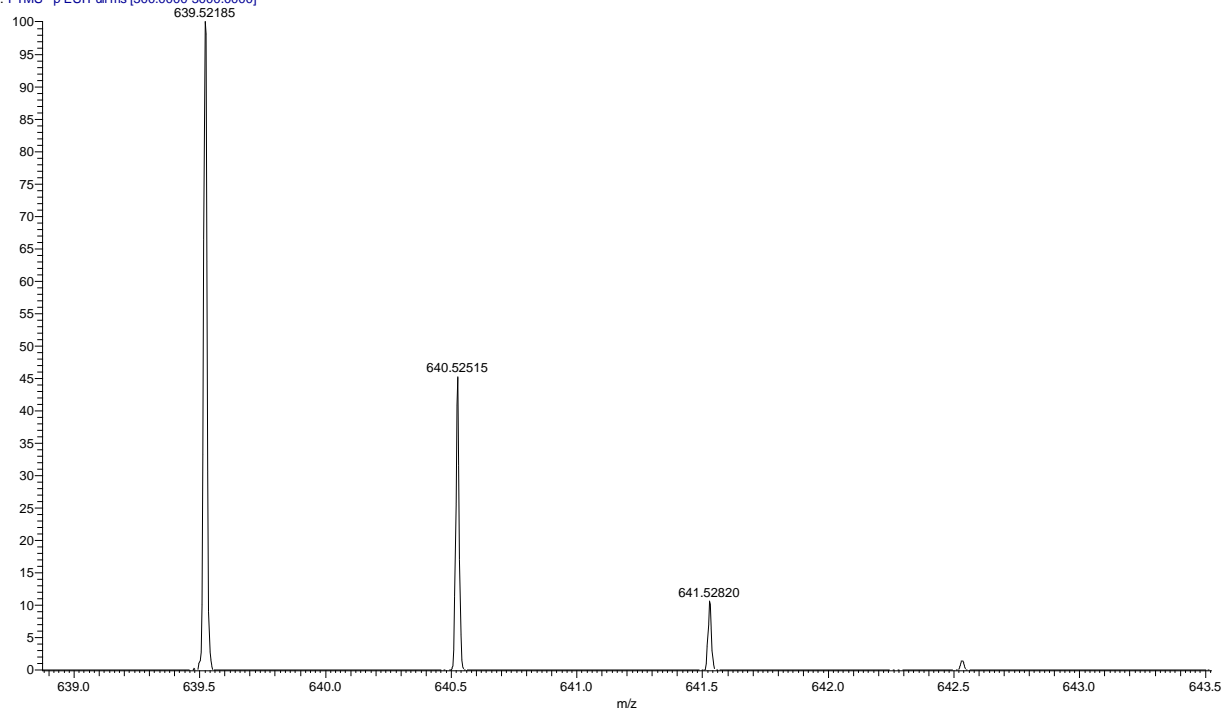

# Thermo QEFMS Analysis Report

## Analysis Info

|               |                                        |                |          |
|---------------|----------------------------------------|----------------|----------|
| Sample Name : | Zk-Mon                                 | Reference No.: | Qhfc077  |
| Instrument :  | Q Exactive Focus Orbitrap              |                |          |
| Source :      | HESI II                                | Polarity :     | Negative |
| Comment :     | ESI neg, 3.0kV, by LC, with sheath gas |                |          |

## Accurate Mass Measurement

|                          |                                                                |
|--------------------------|----------------------------------------------------------------|
| Molecular formula :      | C <sub>74</sub> H <sub>133</sub> N <sub>5</sub> O <sub>6</sub> |
| Experimental Mass [M-H]: | 1187.01830                                                     |
| Theoretical Mass [M-H]:  | 1187.01831                                                     |
| Error (ppm) :            | 0.0                                                            |

D:\Raw data\qhfc077

07/24/17 18:19:58

zk-Mon

qhfc077 #138 RT: 0.63 AV: 1 SB: 208 0.08-0.26, 0.68-1.43 NL: 3.01E  
T: FTMS - p ESI Full ms [300.0000-3000.0000]

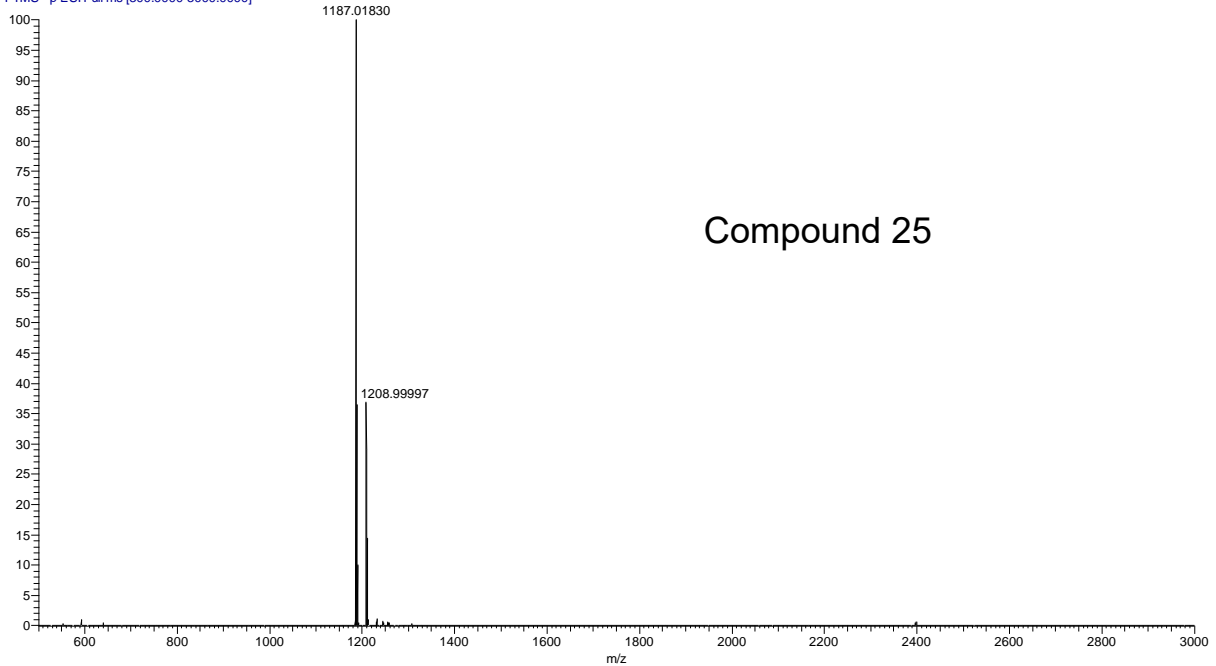

qhfc077 #138 RT: 0.63 AV: 1 SB: 208 0.08-0.26, 0.68-1.43 NL: 3.01E7  
T: FTMS - p ESI Full ms [300.0000-3000.0000]

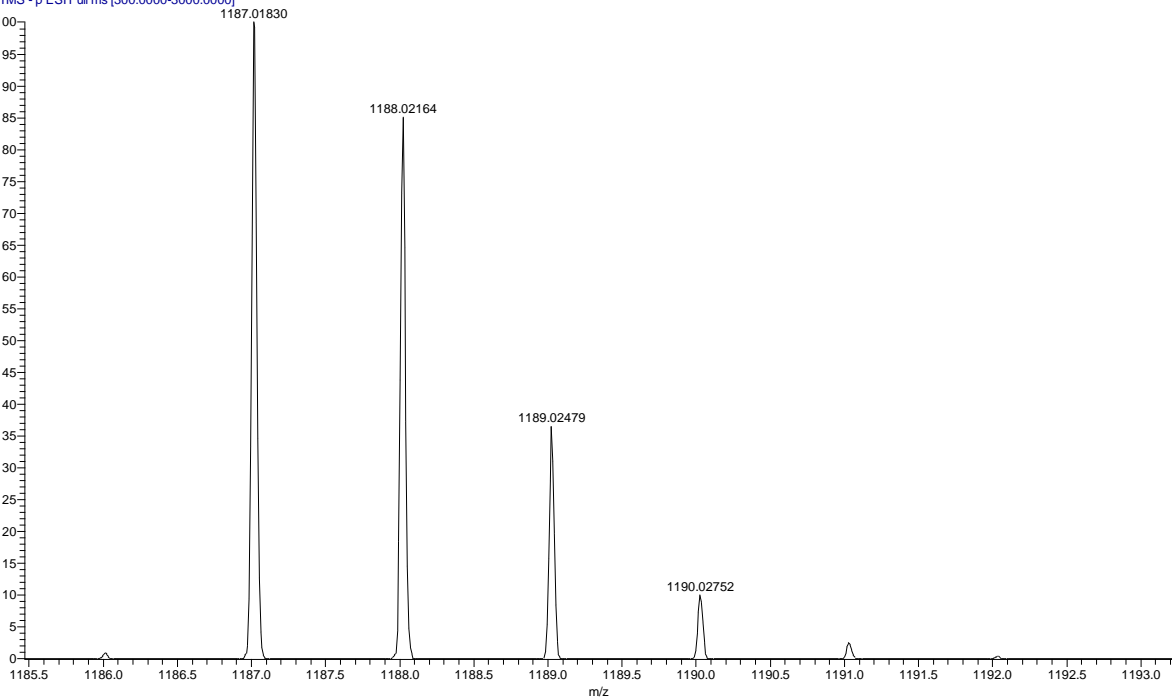

# Thermo QEFMS Analysis Report

## Analysis Info

|               |                                        |                |          |
|---------------|----------------------------------------|----------------|----------|
| Sample Name : | Zk-MonN3                               | Reference No.: | Qhfc078  |
| Instrument :  | Q Exactive Focus Orbitrap              |                |          |
| Source :      | HESI II                                | Polarity :     | Positive |
| Comment :     | ESI pos, 3.2kV, by LC, with sheath gas |                |          |

## Accurate Mass Measurement

|                          |                       |
|--------------------------|-----------------------|
| Molecular formula :      | $C_{82}H_{141}N_9O_5$ |
| Experimental Mass [M-H]: | 1355.09509            |
| Theoretical Mass [M-H]:  | 1355.09479            |
| Error (ppm) :            | 0.2                   |

D:\Raw data\qhfc078

07/24/17 17:01:45

zk-MonN3

qhfc078 #287 RT: 1.29 AV: 1 SB: 208 0.08-0.26 , 0.68-1.43 NL: 4.78E  
T: FTMS + p ESI Full ms [300.0000-3000.0000]

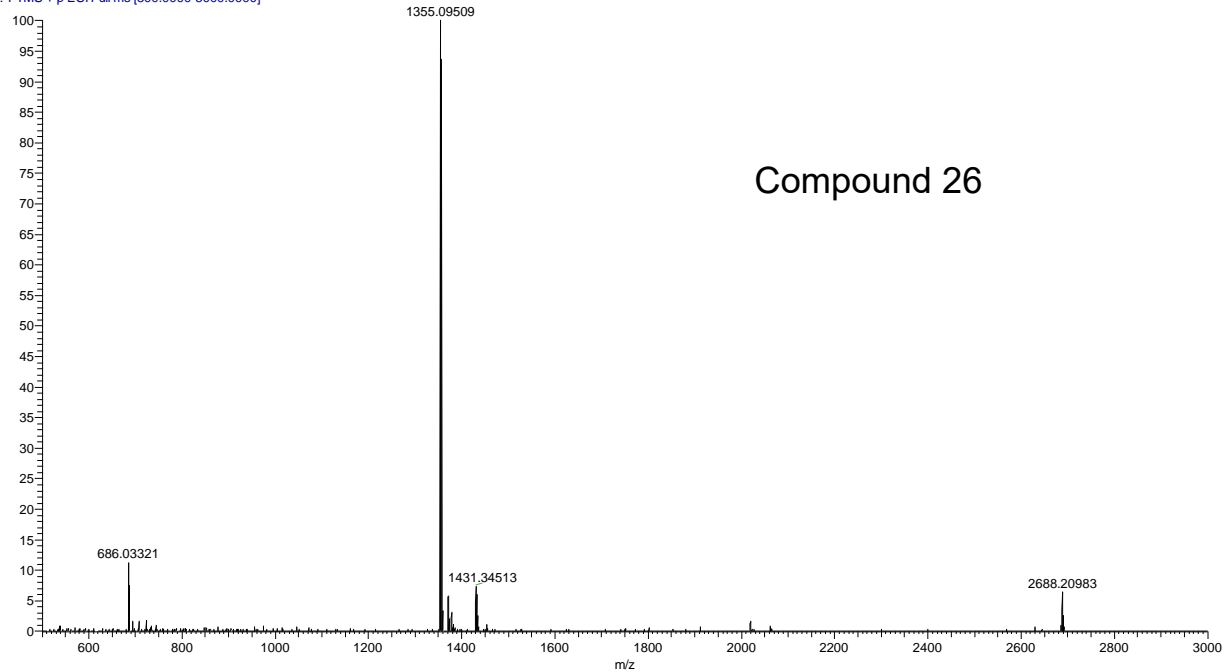

qhfc078 #287 RT: 1.29 AV: 1 SB: 208 0.08-0.26 , 0.68-1.43 NL: 4.78E6  
T: FTMS + p ESI Full ms [300.0000-3000.0000]

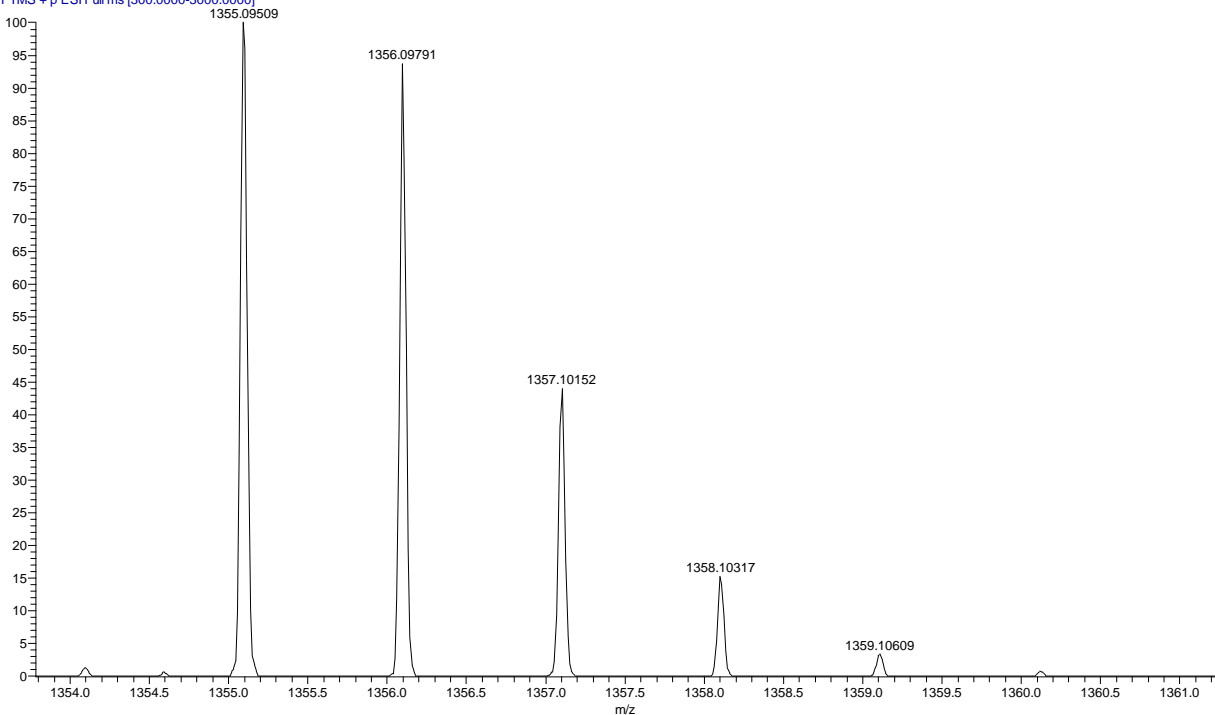

# Thermo QEFMS Analysis Report

## Analysis Info

|               |                                        |                |          |
|---------------|----------------------------------------|----------------|----------|
| Sample Name : | Zk-MonN3COOH                           | Reference No.: | Qhfc079  |
| Instrument :  | Q Exactive Focus Orbitrap              |                |          |
| Source :      | HESI II                                | Polarity :     | Negative |
| Comment :     | ESI neg, 3.0kV, by LC, with sheath gas |                |          |

## Accurate Mass Measurement

|                          |                       |
|--------------------------|-----------------------|
| Molecular formula :      | $C_{81}H_{139}N_9O_5$ |
| Experimental Mass [M-H]: | 1317.08266            |
| Theoretical Mass [M-H]:  | 1317.08264            |
| Error (ppm) :            | 0.0                   |

D:\Raw data\qhfc079

07/24/17 18:31:08

zk-MonN3COOH

qhfc079 #133 RT: 0.60 AV: 1 SB: 208 0.08-0.26 , 0.68-1.43 NL: 1.40E7  
T: FTMS - p ESI Full ms [300.0000-3000.0000]

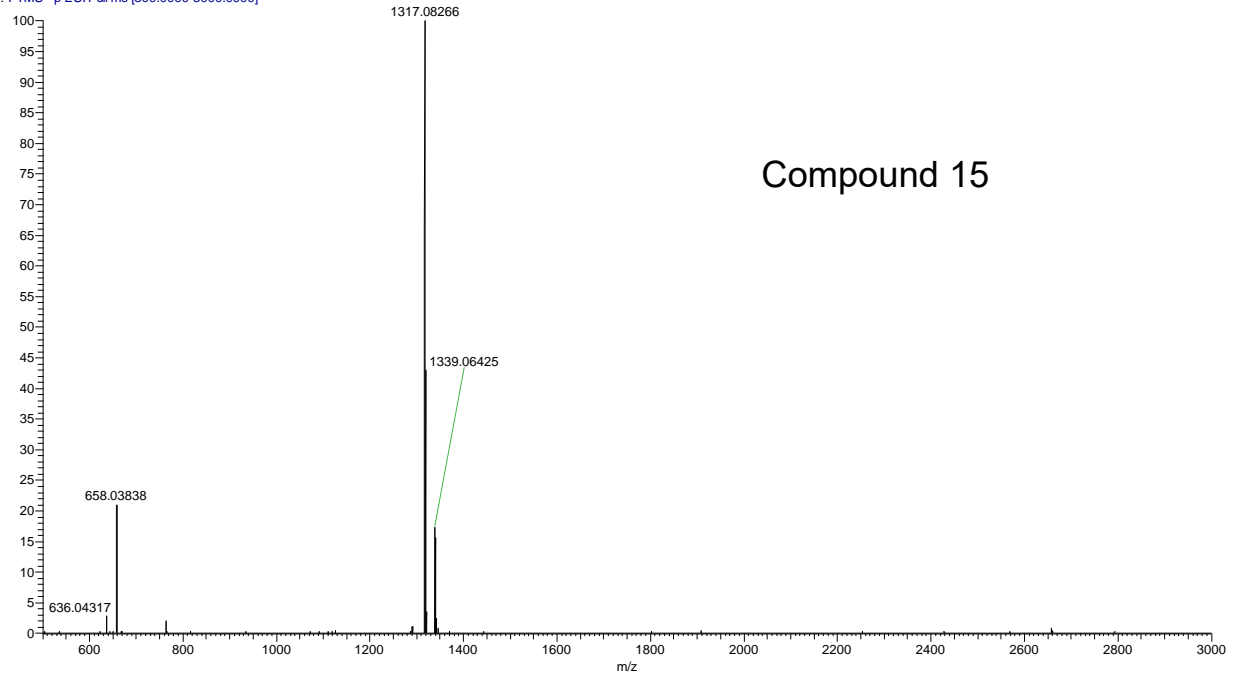

qhfc079 #133 RT: 0.60 AV: 1 SB: 208 0.08-0.26 , 0.68-1.43 NL: 1.40E7  
T: FTMS - p ESI Full ms [300.0000-3000.0000]

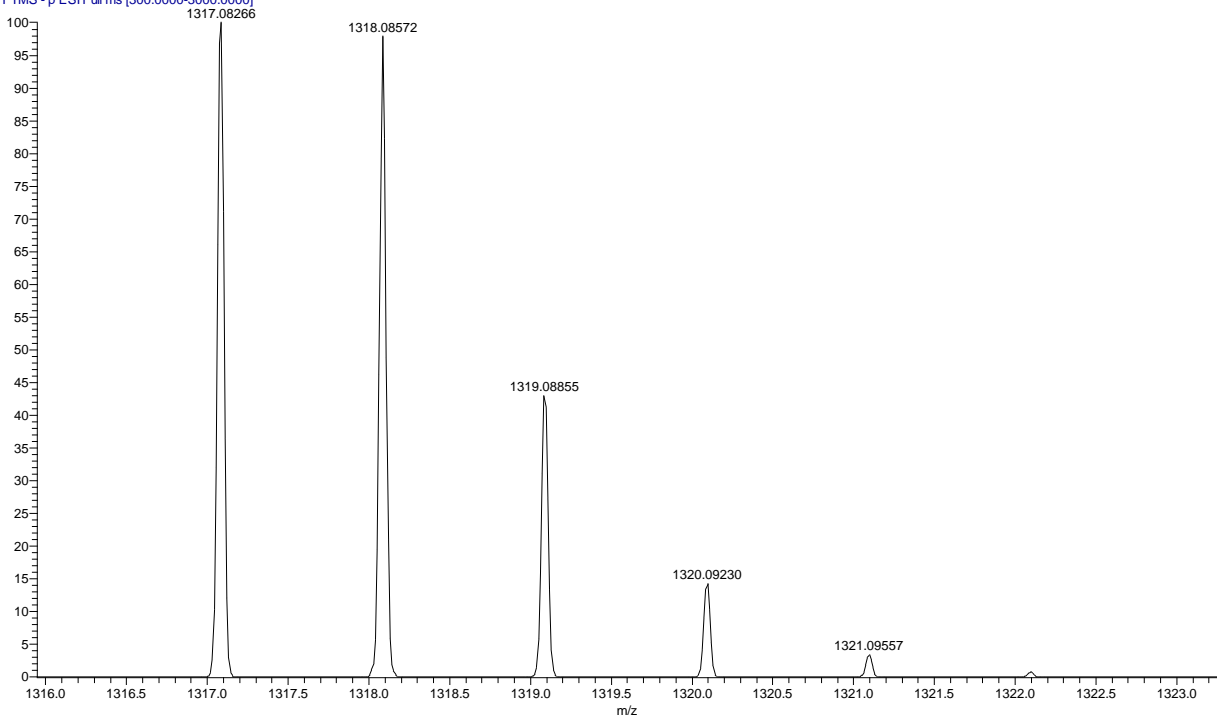

# Thermo QEFMS Analysis Report

## Analysis Info

|               |                                        |                |          |
|---------------|----------------------------------------|----------------|----------|
| Sample Name : | Zk-BenN3e                              | Reference No.: | Qhfc046  |
| Instrument :  | Q Exactive Focus Orbitrap              |                |          |
| Source :      | HESI II                                | Polarity :     | Positive |
| Comment :     | ESI pos, 3.2kV, by LC, with sheath gas |                |          |

## Accurate Mass Measurement

|                                         |                                                               |
|-----------------------------------------|---------------------------------------------------------------|
| Molecular formula :                     | C <sub>42</sub> H <sub>74</sub> N <sub>4</sub> O <sub>3</sub> |
| Experimental Mass [M+Na] <sup>+</sup> : | 705.56467                                                     |
| Theoretical Mass [M+Na] <sup>+</sup> :  | 705.56531                                                     |
| Error (ppm) :                           | 0.9                                                           |

D:\Raw data\qhfc046

07/03/17 15:15:22

zk-BenN3e

qhfc046 #169 RT: 0.77 AV: 1 SB: 210 0.08-0.26, 0.67-1.43 NL: 3.55E

T: FTMS + p ESI Full ms [200.0000-3000.0000]

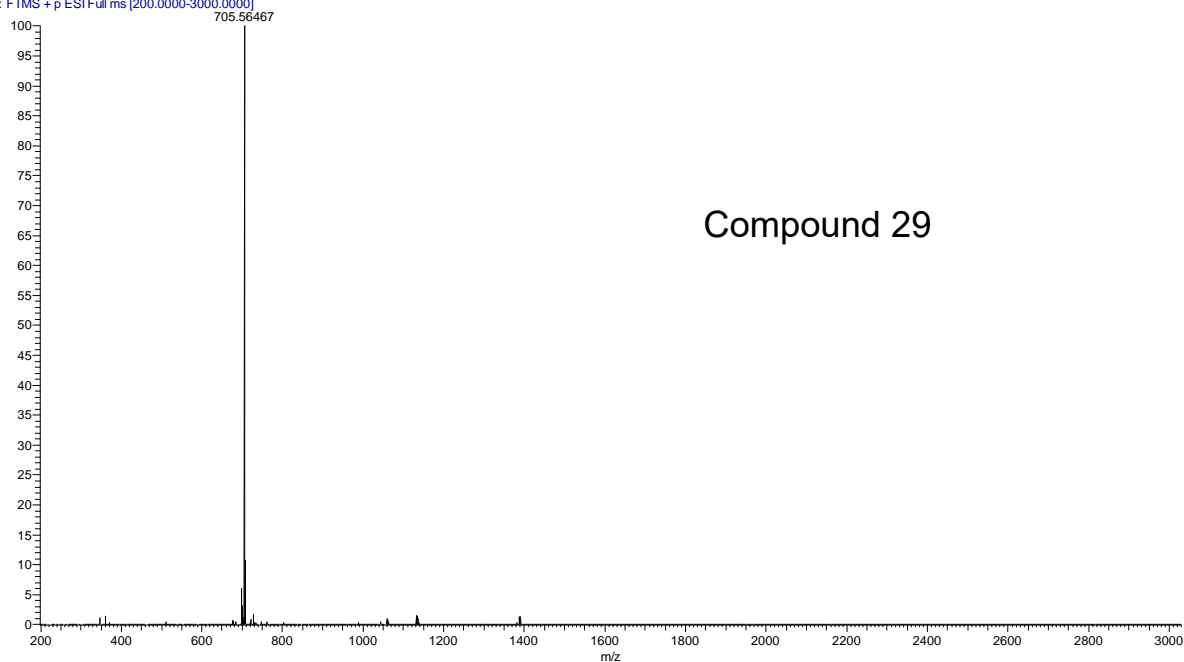

Compound 29

qhfc046 #169 RT: 0.77 AV: 1 SB: 210 0.08-0.26, 0.67-1.43 NL: 3.55E7

T: FTMS + p ESI Full ms [200.0000-3000.0000]

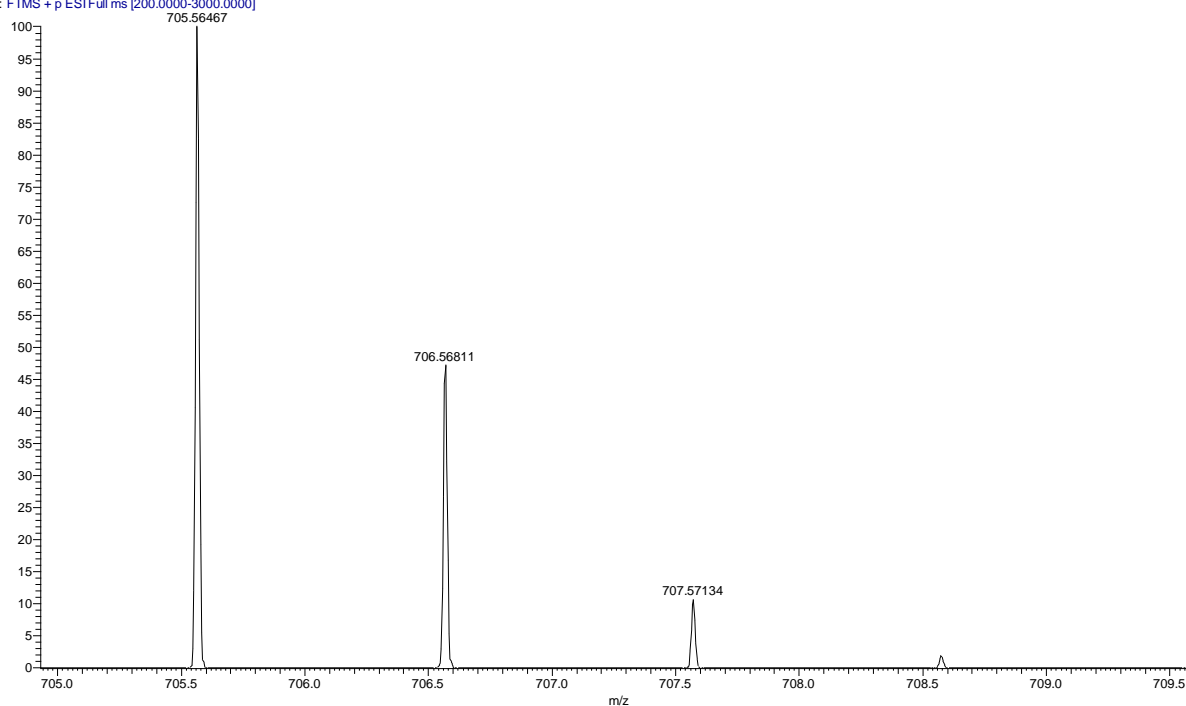



# Thermo QEFMS Analysis Report

## Analysis Info

|               |                                        |                |          |
|---------------|----------------------------------------|----------------|----------|
| Sample Name : | Zk-BenN3COOHe                          | Reference No.: | Qhfc047  |
| Instrument :  | Q Exactive Focus Orbitrap              |                |          |
| Source :      | HESI II                                | Polarity :     | Negative |
| Comment :     | ESI neg, 2.8kV, by LC, with sheath gas |                |          |

## Accurate Mass Measurement

|                          |                                                               |
|--------------------------|---------------------------------------------------------------|
| Molecular formula :      | C <sub>41</sub> H <sub>72</sub> N <sub>4</sub> O <sub>3</sub> |
| Experimental Mass [M-H]: | 667.55339                                                     |
| Theoretical Mass [M-H]:  | 667.55317                                                     |
| Error (ppm) :            | 0.3                                                           |

D:\Raw data\qhfc047\_170704163620

07/04/17 16:37:29

zk-BenN3COOHe

qhfc047\_170704163620 #257 RT: 1.16 AV: 1 SB: 256 0.27-0.74, 1.65  
T: FTMS - p ESI Full ms [140.0000-1000.0000]

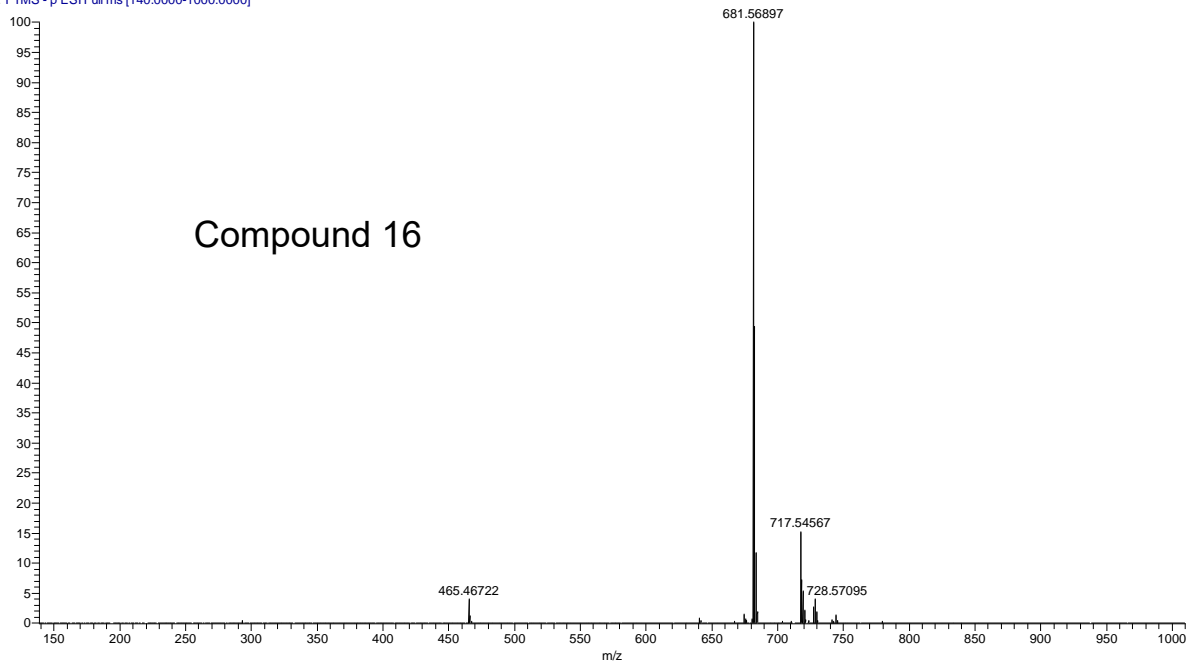

qhfc047\_170704163620 #256 RT: 1.16 AV: 1 SB: 256 0.27-0.74, 1.65-2.32 NL: 1.81E4  
T: FTMS - p ESI Full ms [140.0000-1000.0000]

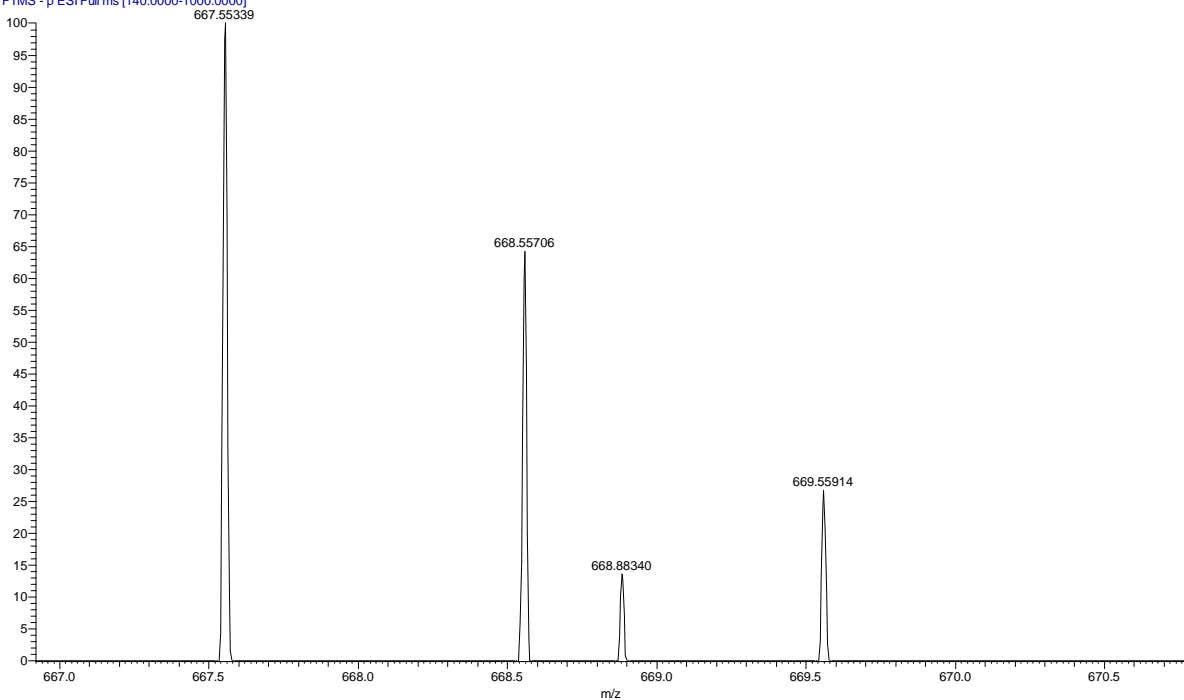

# Thermo QEFMS Analysis Report

## Analysis Info

|               |                                        |                |          |
|---------------|----------------------------------------|----------------|----------|
| Sample Name : | Zk-mone                                | Reference No.: | Qhfc193  |
| Instrument :  | Q Exactive Focus Orbitrap              |                |          |
| Source :      | HESI II                                | Polarity :     | Positive |
| Comment :     | ESI pos, 3.2kV, by LC, with sheath gas |                |          |

## Accurate Mass Measurement

|                                         |                                                                |
|-----------------------------------------|----------------------------------------------------------------|
| Molecular formula :                     | C <sub>76</sub> H <sub>137</sub> N <sub>5</sub> O <sub>6</sub> |
| Experimental Mass [M+Na] <sup>+</sup> : | 1239.04632                                                     |
| Theoretical Mass [M+Na] <sup>+</sup> :  | 1239.04611                                                     |
| Error (ppm) :                           | 0.1                                                            |

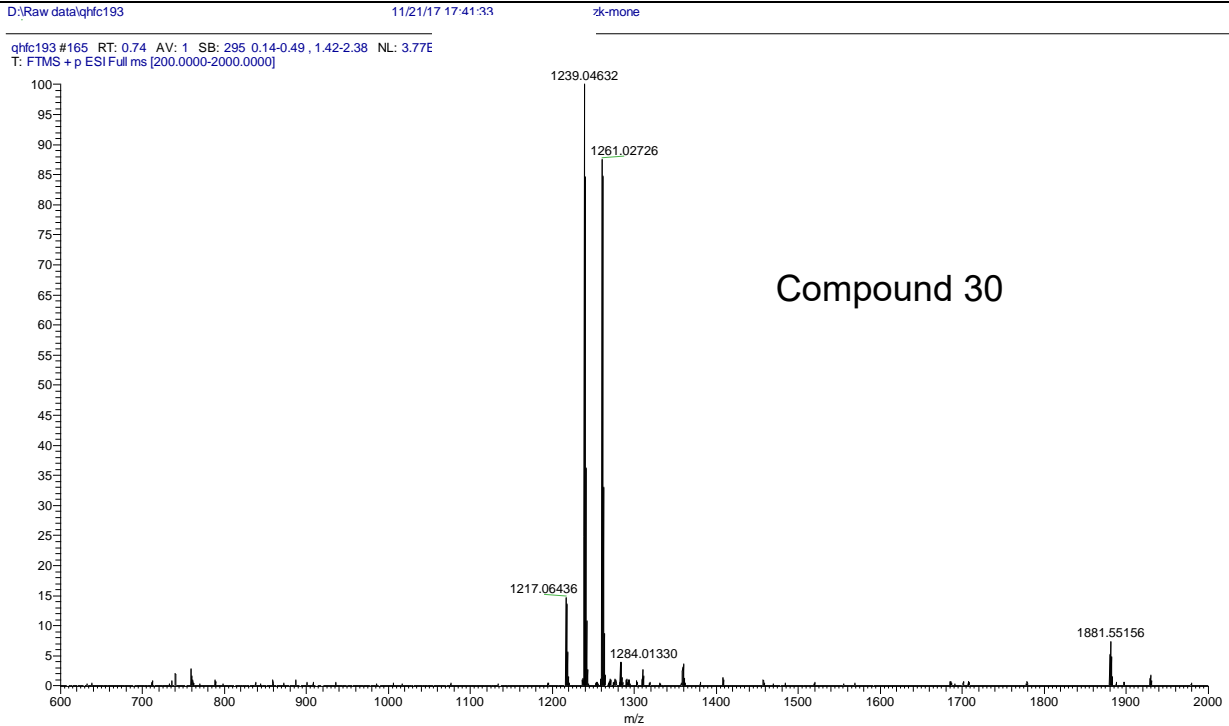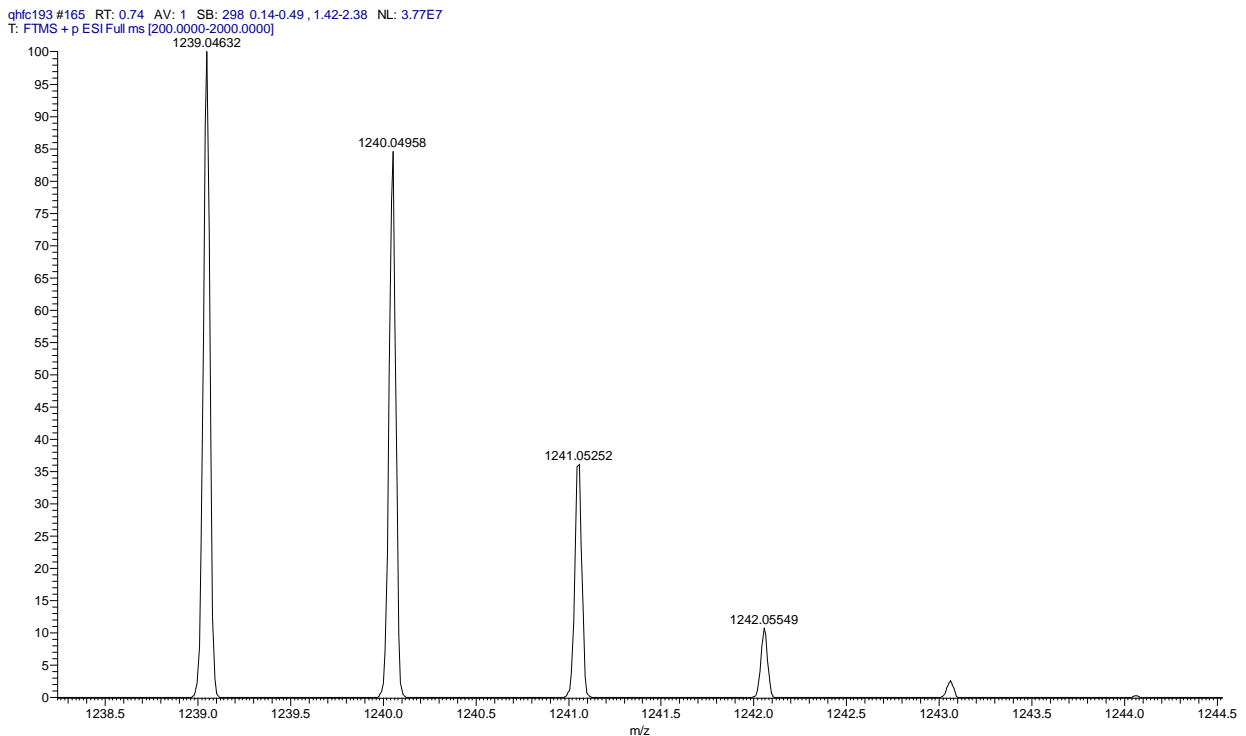

# Thermo QEFMS Analysis Report

## Analysis Info

|               |                                        |                |          |
|---------------|----------------------------------------|----------------|----------|
| Sample Name : | Zk-MonN3-e                             | Reference No.: | Wqhfc246 |
| Instrument :  | Q Exactive Focus Orbitrap              |                |          |
| Source :      | HESI II                                | Polarity :     | Positive |
| Comment :     | ESI pos, 3.2kV, by LC, with sheath gas |                |          |

## Accurate Mass Measurement

|                                |                       |
|--------------------------------|-----------------------|
| Molecular formula :            | $C_{86}H_{149}N_9O_5$ |
| Experimental Mass $[M+Na]^+$ : | 1411.15635            |
| Theoretical Mass $[M+Na]^+$ :  | 1411.15739            |
| Error (ppm) :                  | 0.7                   |

D:\Raw data\wqhfc246 01/16/18 19:08:42 zk-MonN3e

wqhfc246 #284 RT: 1.28 AV: 1 SB: 483 0.39-0.97, 1.85-3.44 NL: 1.36  
T: FTMS + p ESI Full ms [200.0000-3000.0000]

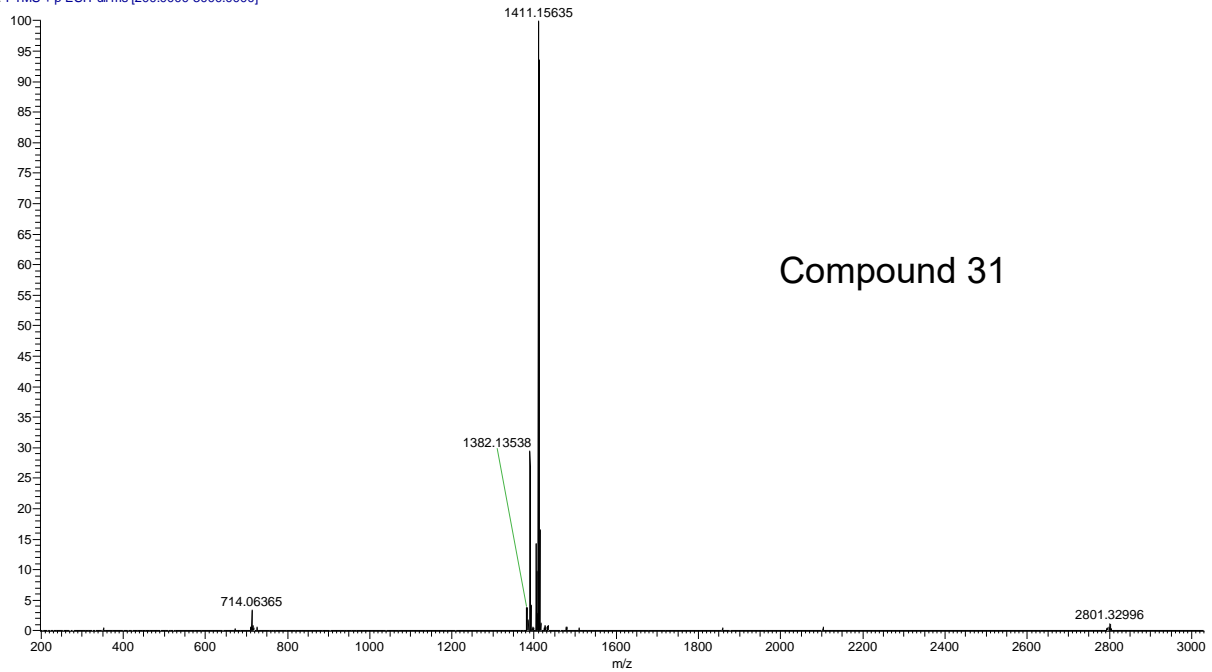

wqhfc246 #284 RT: 1.28 AV: 1 SB: 483 0.39-0.97, 1.85-3.44 NL: 1.36E7  
T: FTMS + p ESI Full ms [200.0000-3000.0000]

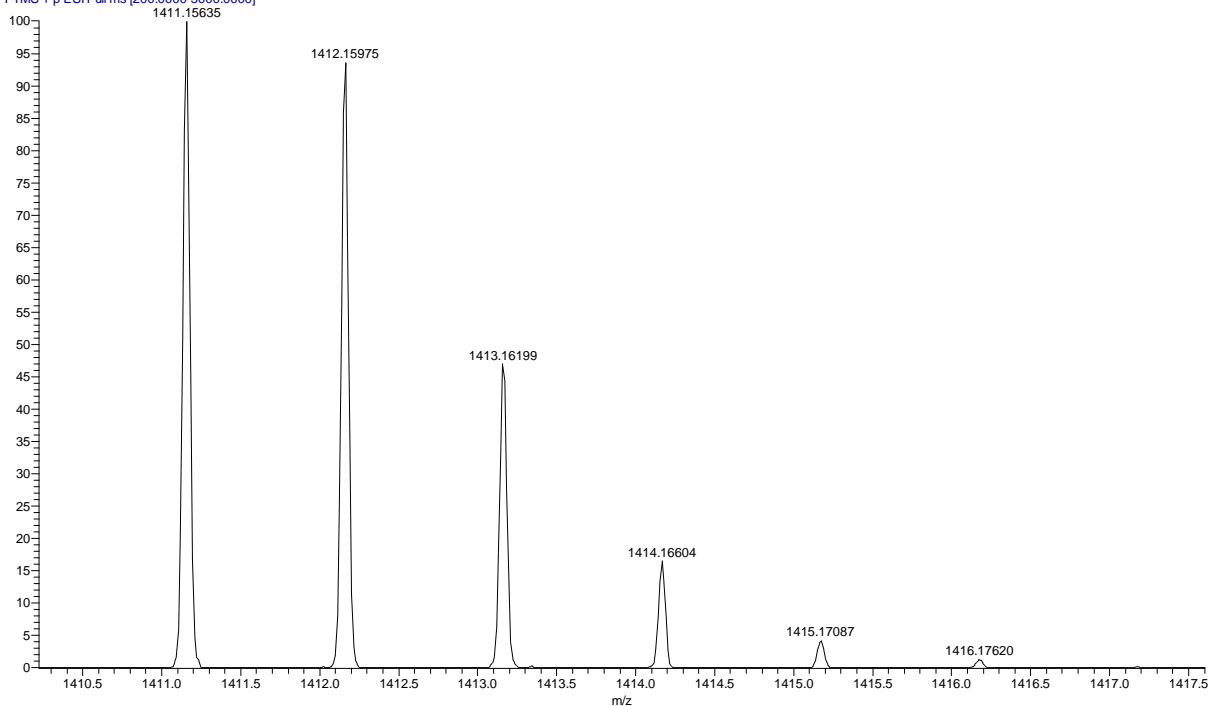

# Thermo QEFMS Analysis Report

## Analysis Info

|               |                                        |                |          |
|---------------|----------------------------------------|----------------|----------|
| Sample Name : | Zk-MonN3COOH-e                         | Reference No.: | Wqhfc247 |
| Instrument :  | Q Exactive Focus Orbitrap              |                |          |
| Source :      | HESI II                                | Polarity :     | Positive |
| Comment :     | ESI pos, 3.2kV, by LC, with sheath gas |                |          |

## Accurate Mass Measurement

|                                         |                                                                |
|-----------------------------------------|----------------------------------------------------------------|
| Molecular formula :                     | C <sub>85</sub> H <sub>147</sub> N <sub>9</sub> O <sub>5</sub> |
| Experimental Mass [M+Na] <sup>+</sup> : | 1397.14134                                                     |
| Theoretical Mass [M+Na] <sup>+</sup> :  | 1397.14174                                                     |
| Error (ppm) :                           | 0.2                                                            |

D:\Raw data\wqhfc247

01/16/18 19:21:39

zk-MonN3COOH-e

wqhfc247 #106 RT: 0.48 AV: 1 SB: 184 0.04-0.25, 0.72-1.33 NL: 3.62  
T: FTMS + p ESI Full ms [200.0000-3000.0000]

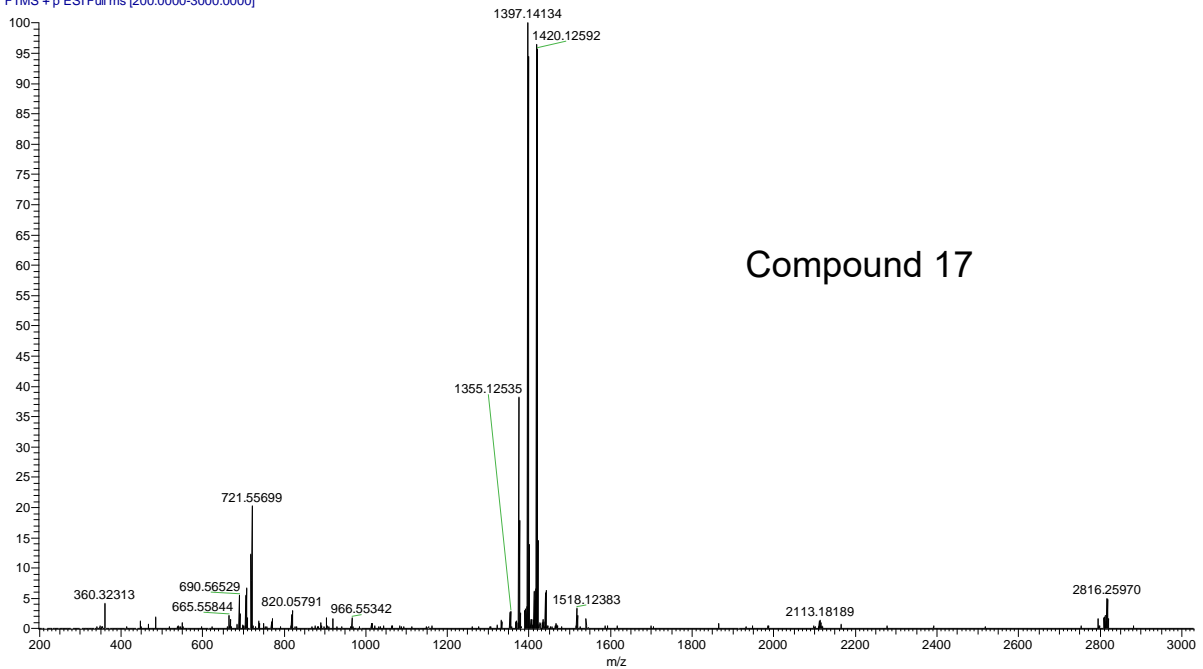

wqhfc247 #106 RT: 0.48 AV: 1 SB: 184 0.04-0.25, 0.72-1.33 NL: 3.62E6  
T: FTMS + p ESI Full ms [200.0000-3000.0000]

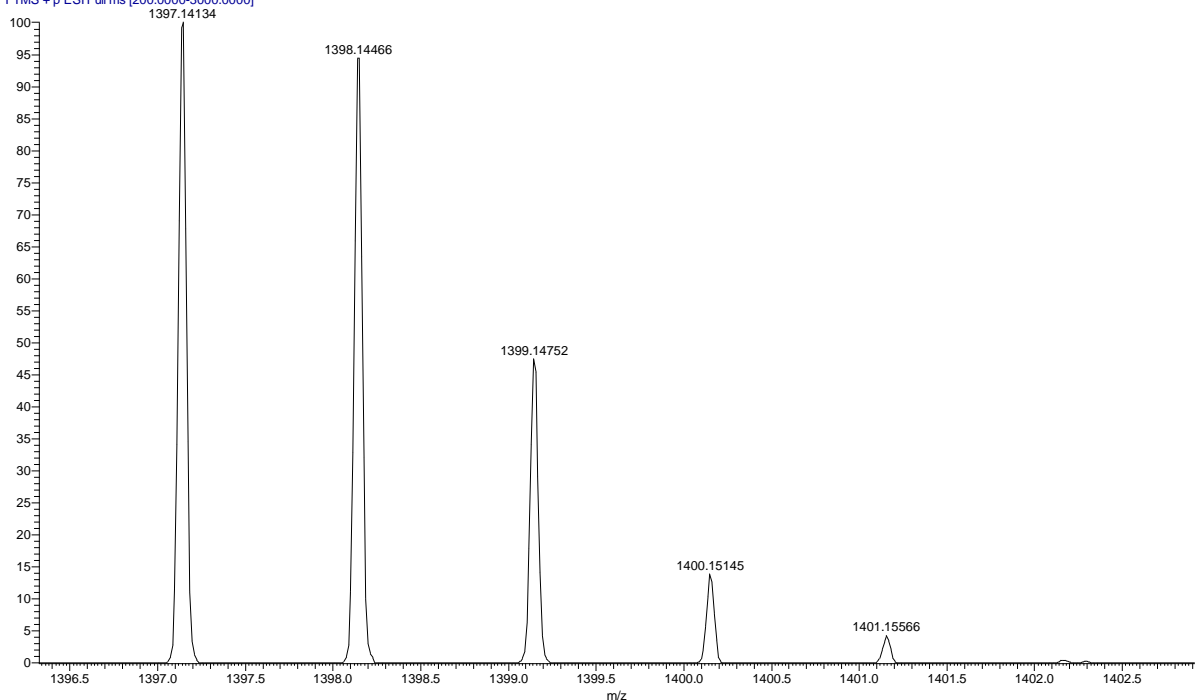

# Thermo QEFMS Analysis Report

## Analysis Info

|               |                                        |                |          |
|---------------|----------------------------------------|----------------|----------|
| Sample Name : | Zk-OAT2                                | Reference No.: | Qhfc068  |
| Instrument :  | Q Exactive Focus Orbitrap              |                |          |
| Source :      | HESI II                                | Polarity :     | Negative |
| Comment :     | ESI neg, 3.0kV, by LC, with sheath gas |                |          |

## Accurate Mass Measurement

|                                        |                                                                |
|----------------------------------------|----------------------------------------------------------------|
| Molecular formula :                    | C <sub>74</sub> H <sub>133</sub> N <sub>5</sub> O <sub>6</sub> |
| Experimental Mass [M-H] <sup>-</sup> : | 1187.01794                                                     |
| Theoretical Mass [M-H] <sup>-</sup> :  | 1187.01831                                                     |
| Error (ppm) :                          | 0.3                                                            |

D:\Raw data\qhfc068

07/24/17 17:24:05

zk-OAT2

qhfc068 #118 RT: 0.54 AV: 1 SB: 210 0.08-0.26 , 0.67-1.43 NL: 4.96E  
T: FTMS -p ESI Full ms [300.0000-3000.0000]

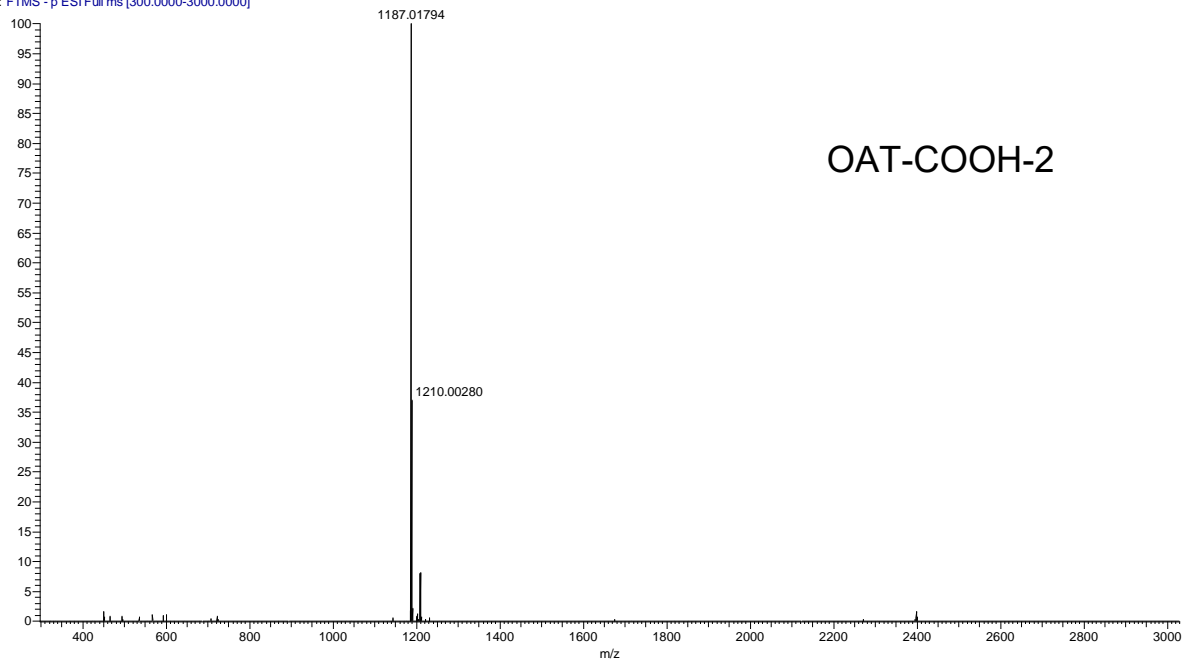

qhfc068 #118 RT: 0.54 AV: 1 SB: 210 0.08-0.26 , 0.67-1.43 NL: 4.96E7  
T: FTMS -p ESI Full ms [300.0000-3000.0000]

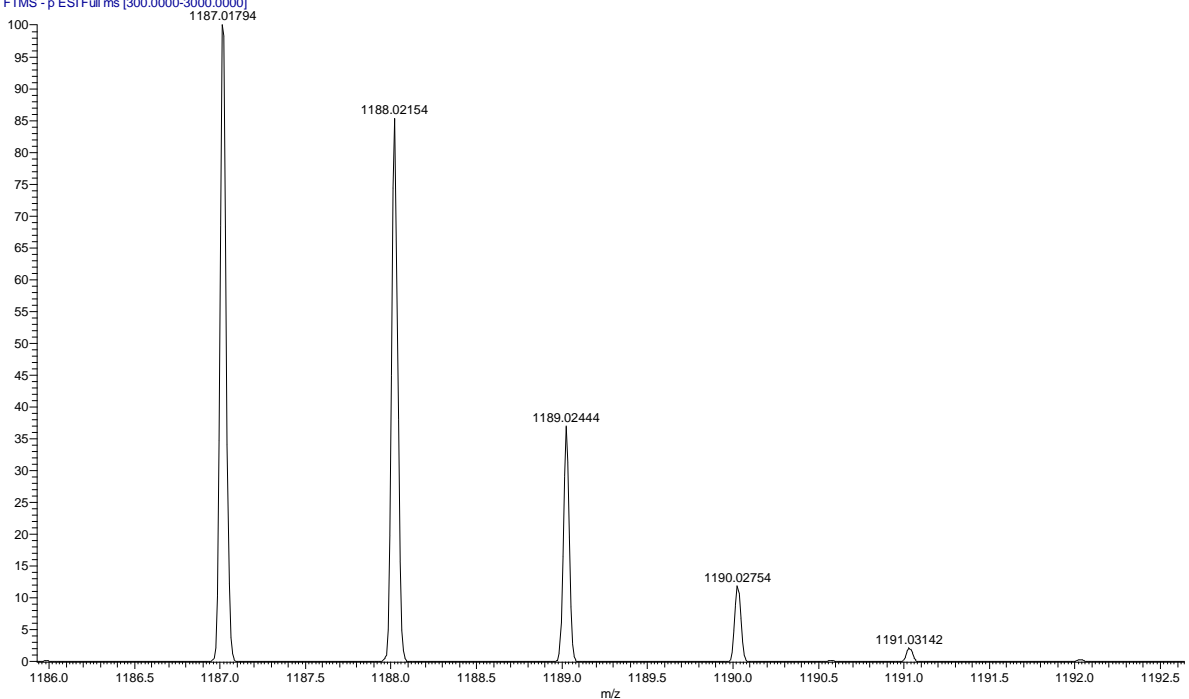

# Thermo QEFMS Analysis Report

## Analysis Info

|               |                                        |                |          |
|---------------|----------------------------------------|----------------|----------|
| Sample Name : | Zk-OAT3                                | Reference No.: | Qhfc069  |
| Instrument :  | Q Exactive Focus Orbitrap              |                |          |
| Source :      | HESI II                                | Polarity :     | Positive |
| Comment :     | ESI pos, 3.2kV, by LC, with sheath gas |                |          |

## Accurate Mass Measurement

|                                |                       |
|--------------------------------|-----------------------|
| Molecular formula :            | $C_{77}H_{136}N_6O_5$ |
| Experimental Mass $[M+Na]^+$ : | 1248.04605            |
| Theoretical Mass $[M+Na]^+$ :  | 1248.04644            |
| Error (ppm) :                  | 0.3                   |

D:\Raw data\qhf069

07/24/17 15:37:04

zk-OAT3

qhf069 #279 RT: 1.26 AV: 1 SB: 211 0.08-0.26 , 0.67-1.43 NL: 9.56E  
T: FTMS + p ESI Full ms [300.0000-3000.0000]

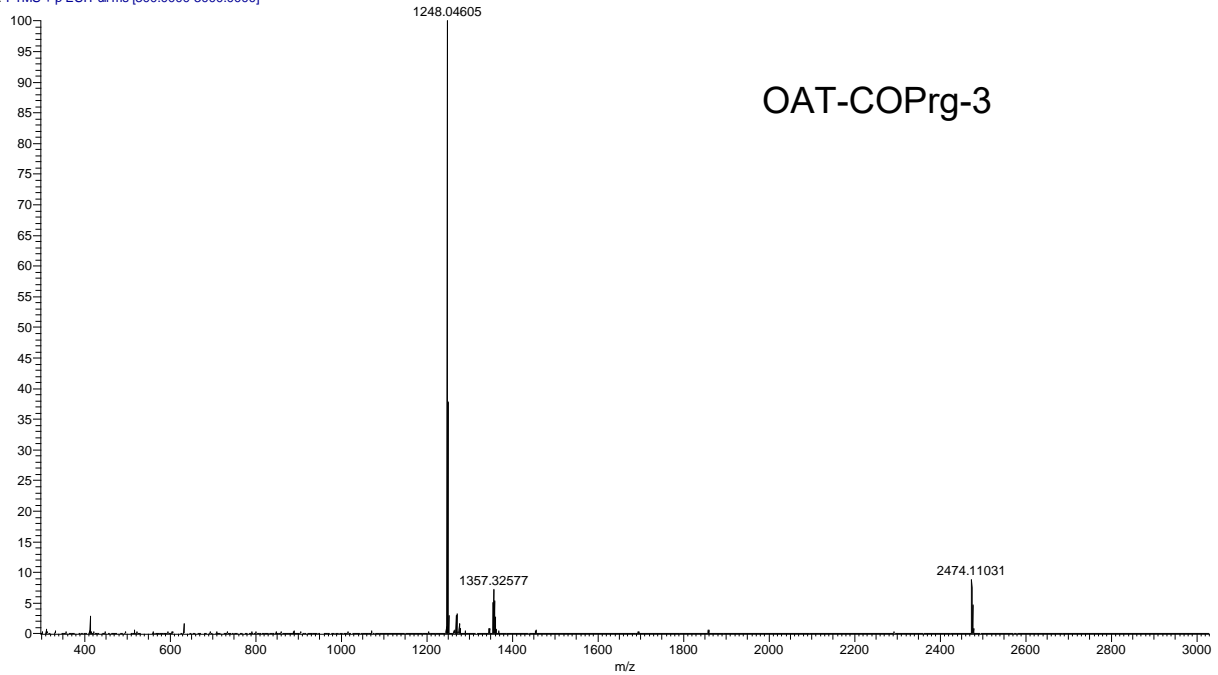

qhf069 #279 RT: 1.26 AV: 1 SB: 211 0.08-0.26 , 0.67-1.43 NL: 9.56E6  
T: FTMS + p ESI Full ms [300.0000-3000.0000]

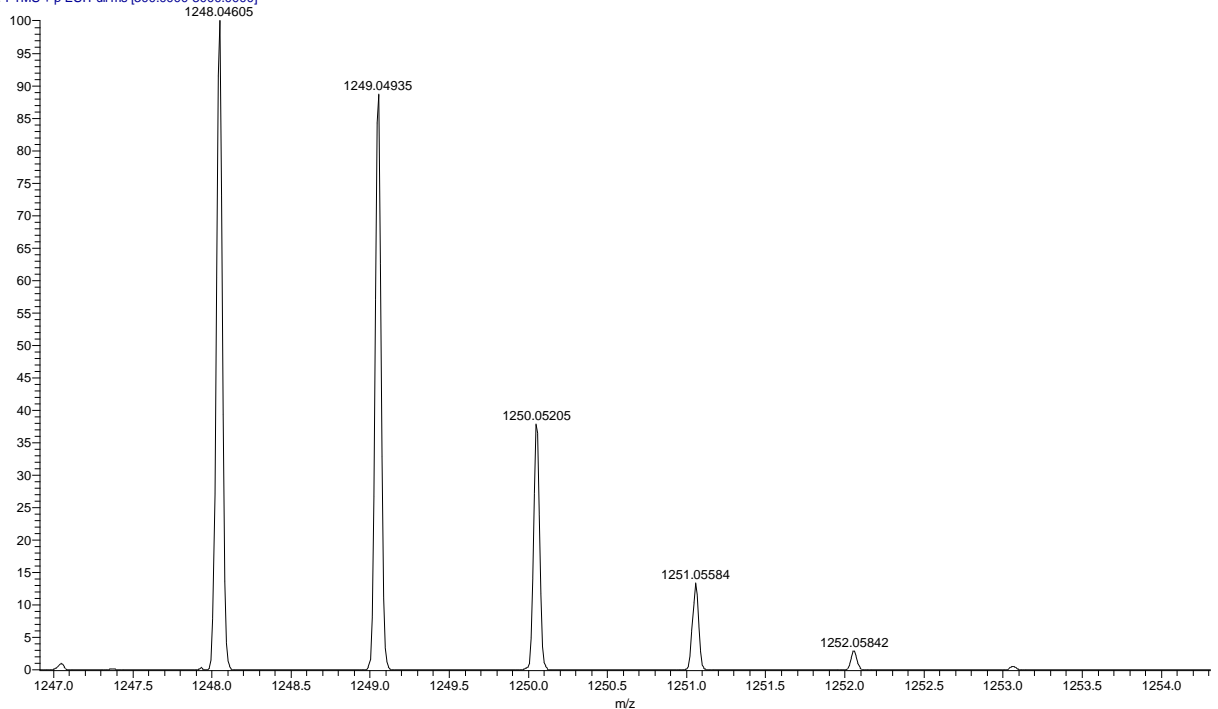

# Thermo QEFMS Analysis Report

## Analysis Info

|               |                                        |                |          |
|---------------|----------------------------------------|----------------|----------|
| Sample Name : | Zk-OAT4                                | Reference No.: | Qhfc039  |
| Instrument :  | Q Exactive Focus Orbitrap              |                |          |
| Source :      | HESI II                                | Polarity :     | Positive |
| Comment :     | ESI pos, 3.2kV, by LC, with sheath gas |                |          |

## Accurate Mass Measurement

|                                                                 |                                   |
|-----------------------------------------------------------------|-----------------------------------|
| Molecular formula :                                             | $C_{116}H_{204}N_{10}O_8$         |
| Experimental Mass $[M-H+2Na]^+$ , $[M+2Na]^{2+}$ , $[M+Na]^+$ : | 1911.56056, 956.28316, 1889.57585 |
| Theoretical Mass $[M-H+2Na]^+$ , $[M+2Na]^{2+}$ , $[M+Na]^+$ :  | 1911.56076, 956.28402, 1889.57882 |
| Error (ppm) :                                                   | 0.1, 0.8, 1.5                     |

D:\Raw data\qhfc039 07/03/17 14:25:58 zk-OAT4

qhfc039 #163-219 RT: 0.74-0.99 AV: 57 SB: 267 0.19-0.57, 1.12-1.94  
T: FTMS + p ESI Full ms [200.0000-3000.0000]

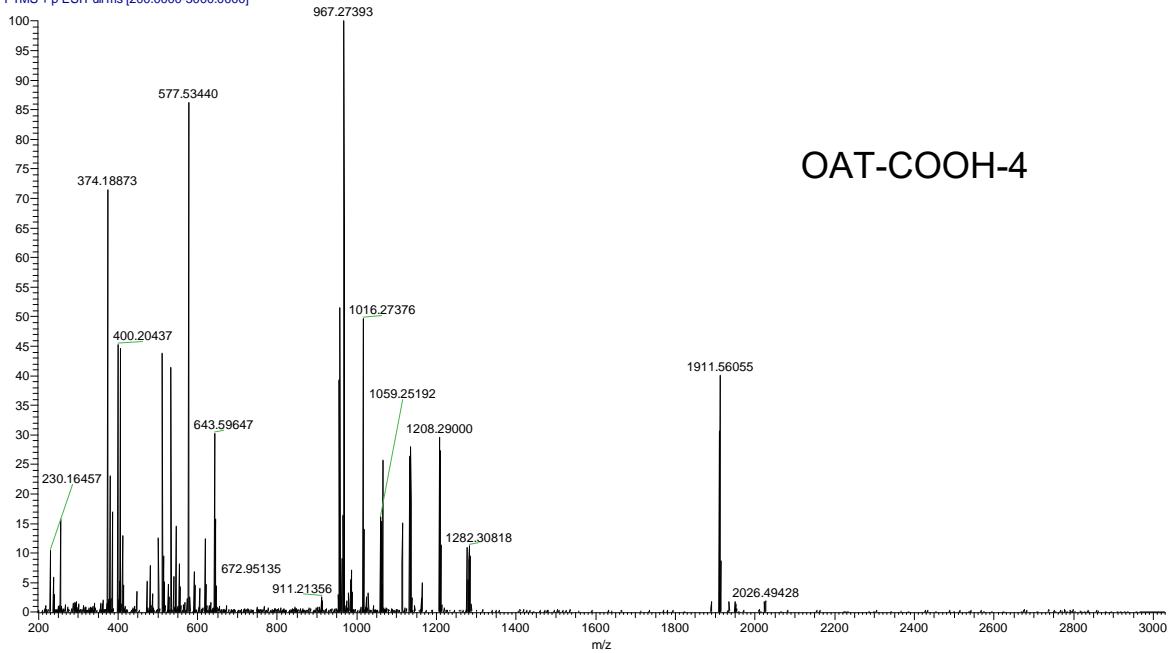

qhfc039 #163-219 RT: 0.74-0.99 AV: 57 SB: 267 0.19-0.57, 1.12-1.94 NL: 9.73E4  
T: FTMS + p ESI Full ms [200.0000-3000.0000]

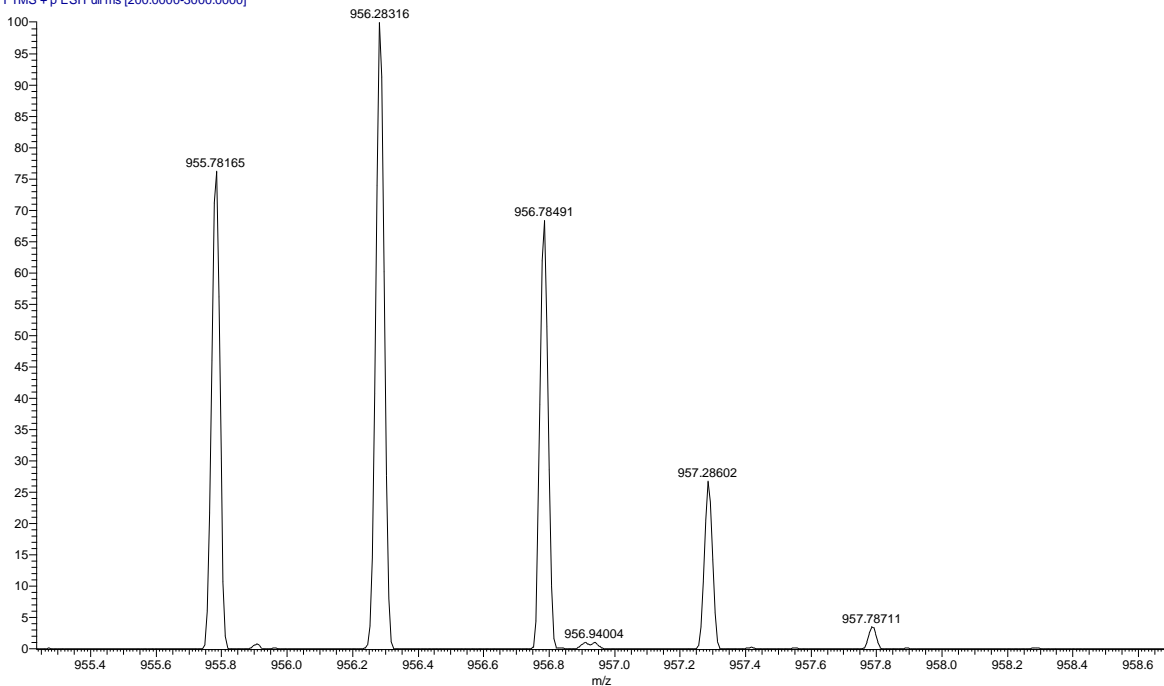

# Thermo QEFMS Analysis Report

## Analysis Info

|               |                                        |                |          |
|---------------|----------------------------------------|----------------|----------|
| Sample Name : | Zk-OAT5                                | Reference No.: | Qhfc040  |
| Instrument :  | Q Exactive Focus Orbitrap              |                |          |
| Source :      | HESI II                                | Polarity :     | Positive |
| Comment :     | ESI pos, 3.2kV, by LC, with sheath gas |                |          |

## Accurate Mass Measurement

|                                         |                                                                  |
|-----------------------------------------|------------------------------------------------------------------|
| Molecular formula :                     | C <sub>119</sub> H <sub>207</sub> N <sub>11</sub> O <sub>7</sub> |
| Experimental Mass [M+Na] <sup>+</sup> : | 1926.60968                                                       |
| Theoretical Mass [M+Na] <sup>+</sup> :  | 1926.61044                                                       |
| Error (ppm) :                           | 0.3                                                              |

D:\Raw data\qhf040 07/03/17 14:32:08 zk-OAT5

qhf040 #704 RT: 3.18 AV: 1 SB: 291 2.11-2.74 , 4.22-4.89 NL: 1.51E  
T: FTMS + p ESI Full ms [200.0000-3000.0000]

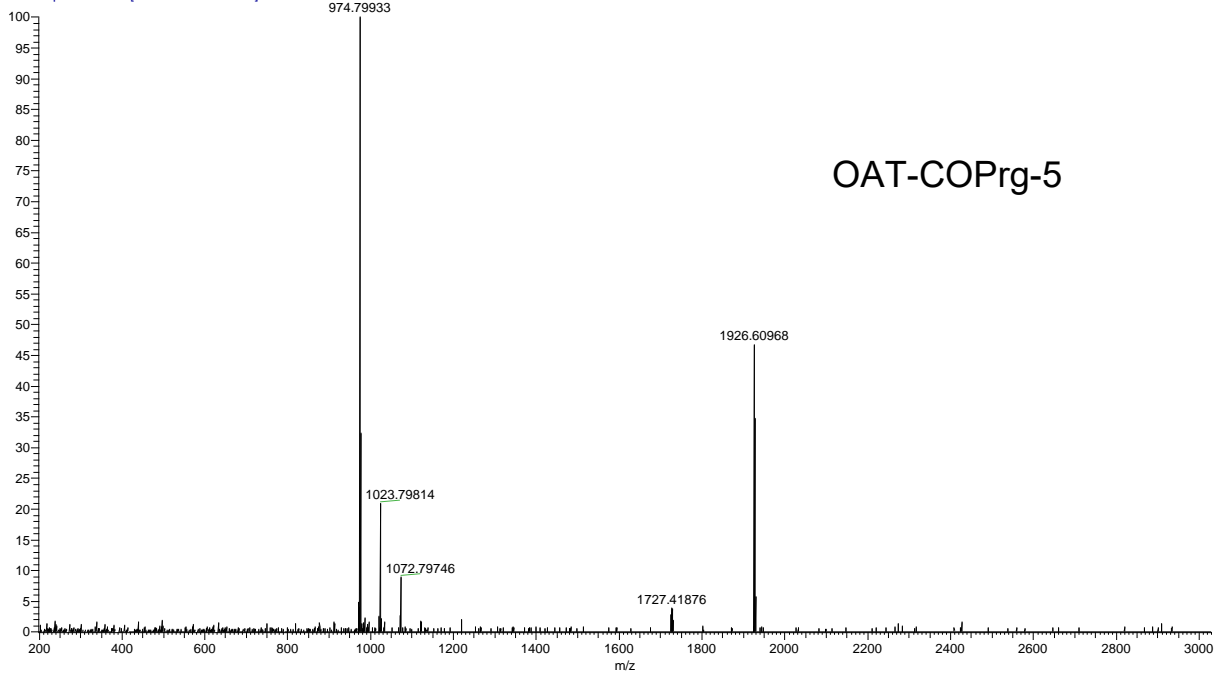

qhf040 #704 RT: 3.18 AV: 1 SB: 291 2.11-2.74 , 4.22-4.89 NL: 7.05E5  
T: FTMS + p ESI Full ms [200.0000-3000.0000]

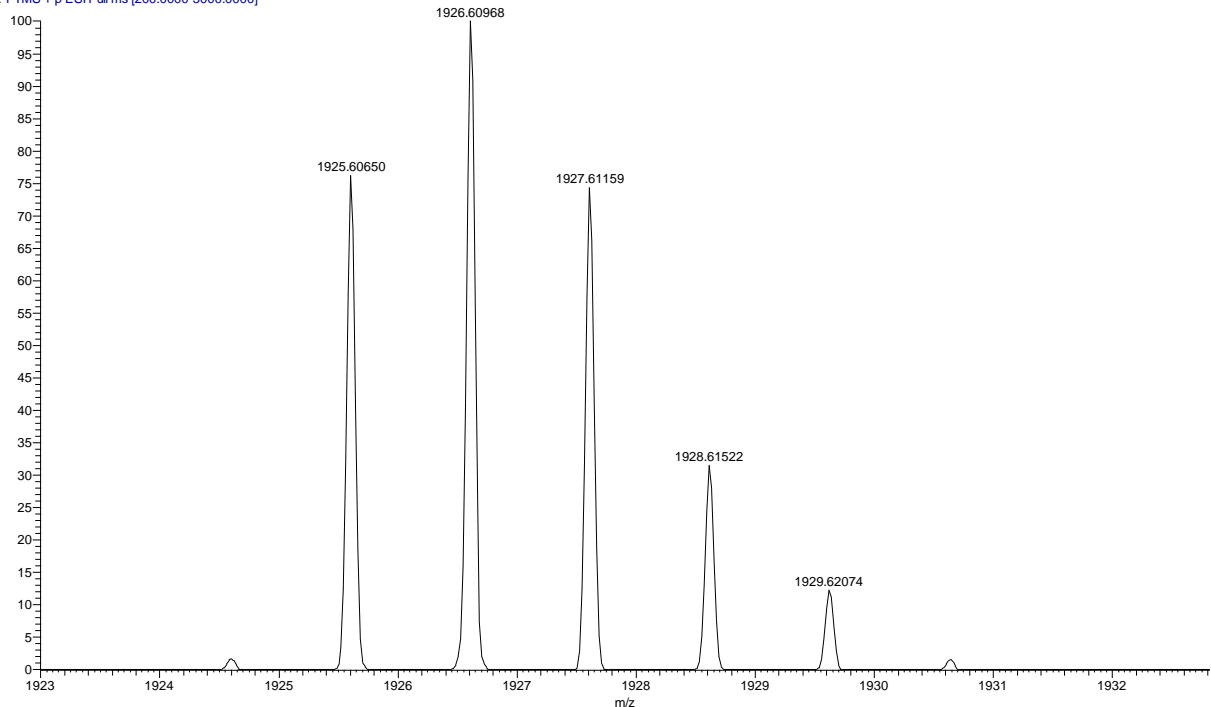



# Thermo QEFMS Analysis Report

## Analysis Info

|               |                                        |                |          |
|---------------|----------------------------------------|----------------|----------|
| Sample Name : | Zk-OAT6                                | Reference No.: | Qhfc041  |
| Instrument :  | Q Exactive Focus Orbitrap              |                |          |
| Source :      | HESI II                                | Polarity :     | Positive |
| Comment :     | ESI pos, 3.2kV, by LC, with sheath gas |                |          |

## Accurate Mass Measurement

|                                                    |                              |
|----------------------------------------------------|------------------------------|
| Molecular formula :                                | $C_{158}H_{275}N_{15}O_{10}$ |
| Experimental Mass $[M-H+2Na]^+$ , $[M+2Na]^{2+}$ : | 2589.12050, 1295.06281       |
| Theoretical Mass $[M-H+2Na]^+$ , $[M+2Na]^{2+}$ :  | 2589.12152, 1295.06440       |
| Error (ppm) :                                      | 0.3, 1.2                     |

D:\Raw data\qhfc041

07/03/17 14:38:18

zk-OAT6

qhfc041 #624-752 RT: 2.83-3.41 AV: 129 SB: 254 1.17-2.31 NL: 1.82  
T: FTMS + p ESI Full ms [200.0000-3000.0000]

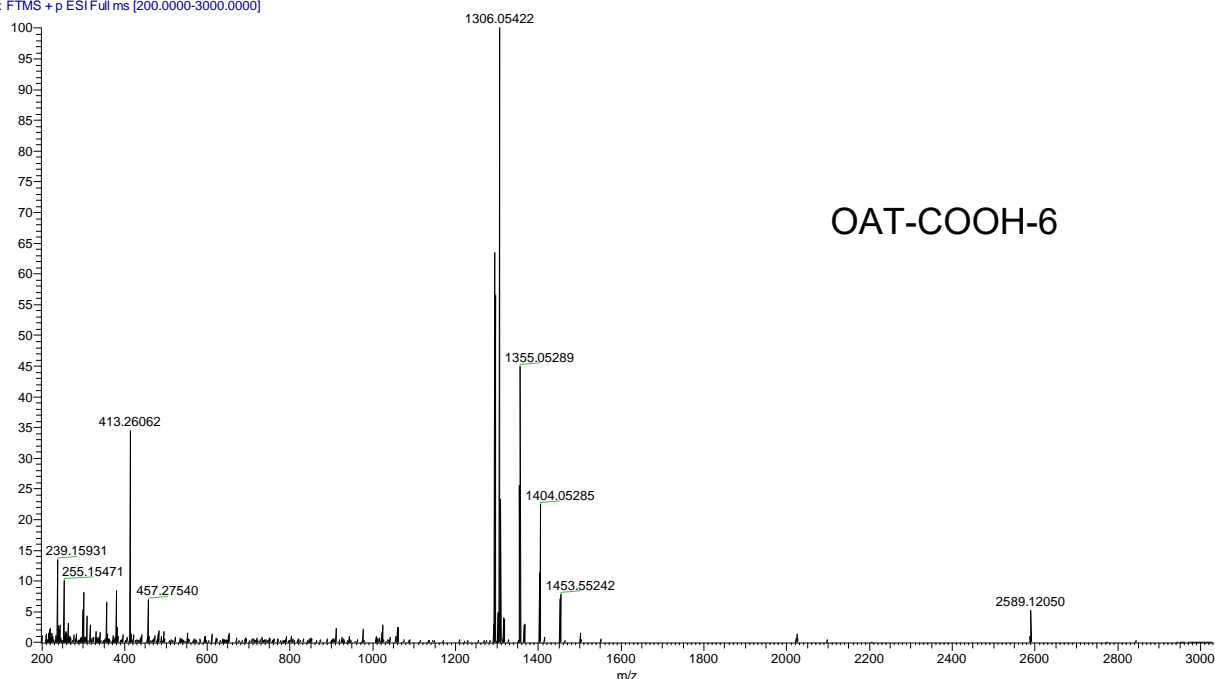

qhfc041 #625-753 RT: 2.83-3.41 AV: 129 SB: 253 1.17-2.31 NL: 9.65E3  
T: FTMS + p ESI Full ms [200.0000-3000.0000]

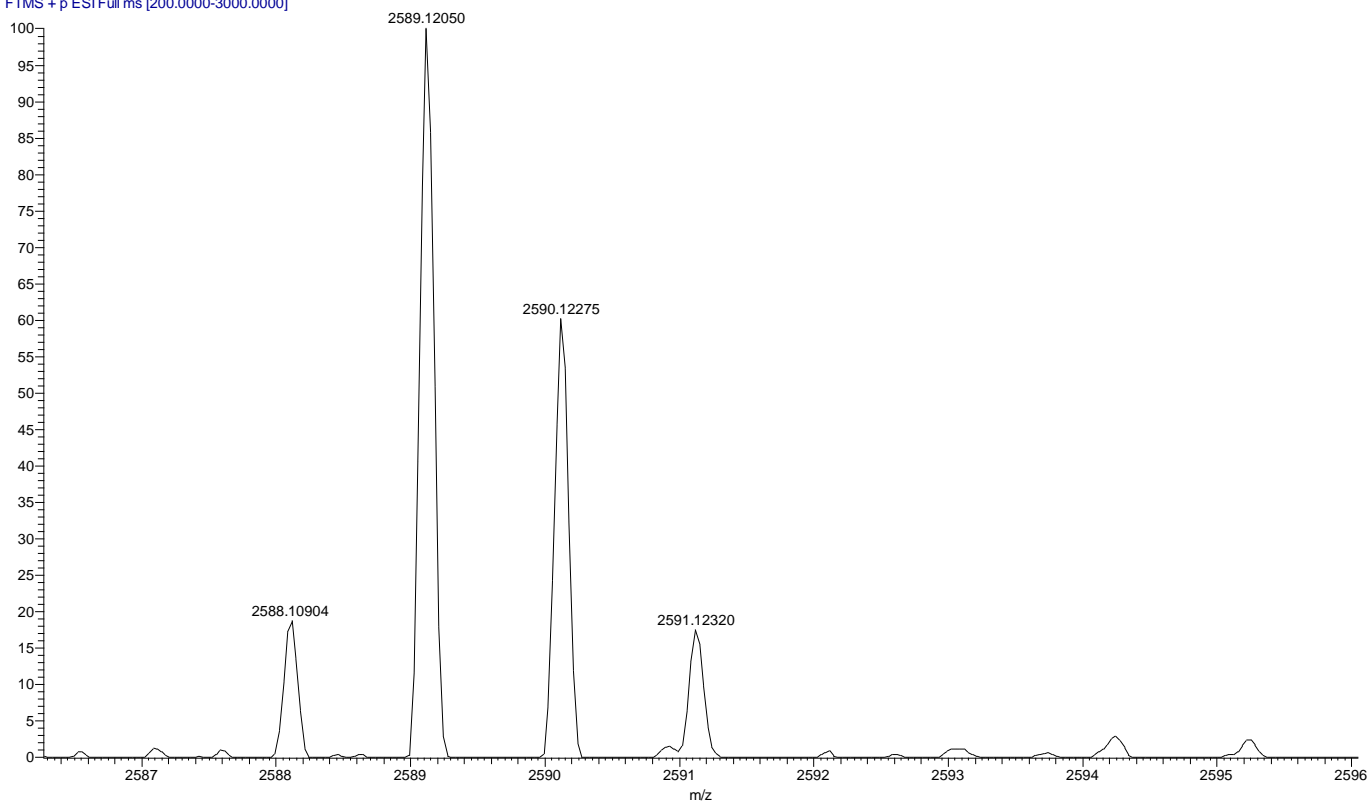

qhfc041 #624-752 RT: 2.83-3.41 AV: 129 SB: 254 1.17-2.31 NL: 1.15E5  
T: FTMS + p ESI Full ms [200.0000-3000.0000]

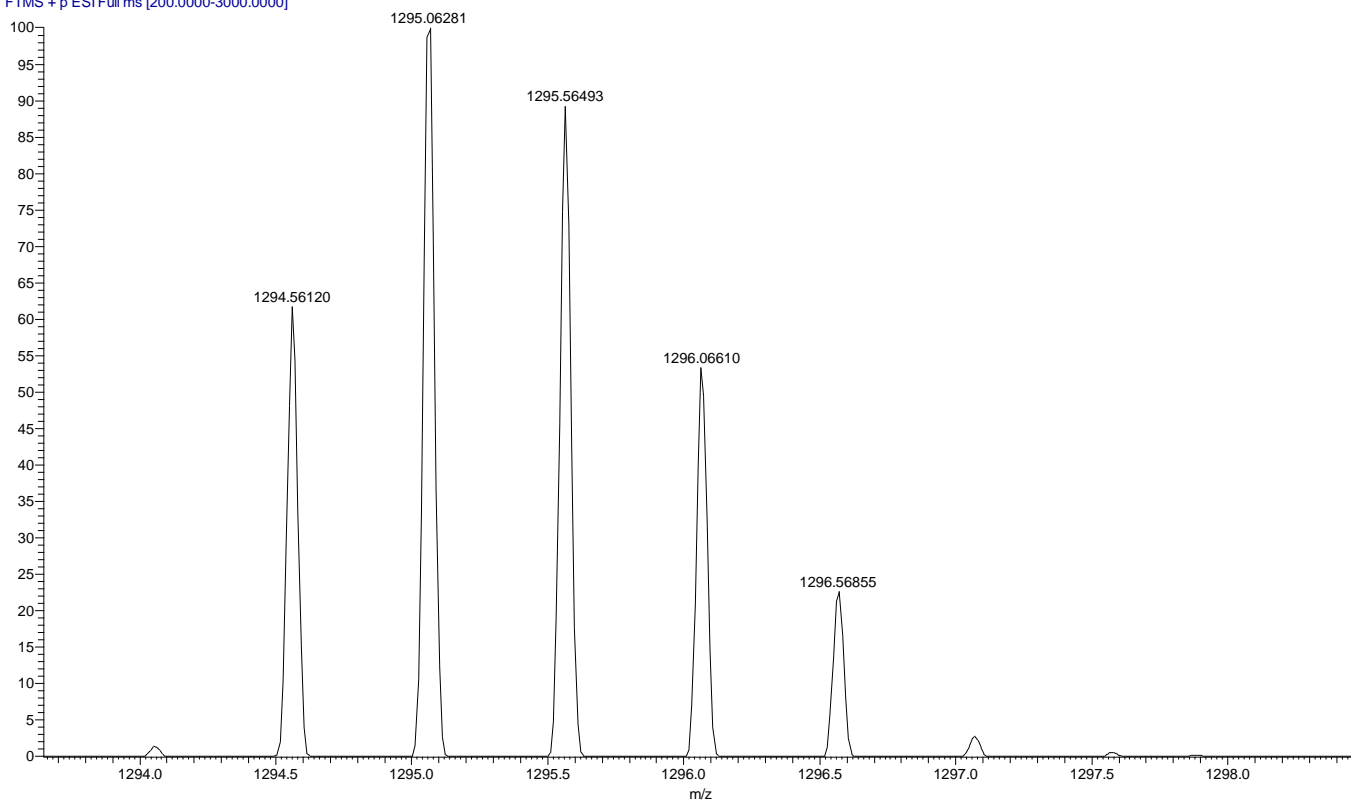

# Thermo QEFMS Analysis Report

## Analysis Info

|               |                                        |                |          |
|---------------|----------------------------------------|----------------|----------|
| Sample Name : | Zk-OAT7                                | Reference No.: | Qhfc070  |
| Instrument :  | Q Exactive Focus Orbitrap              |                |          |
| Source :      | HESI II                                | Polarity :     | Positive |
| Comment :     | ESI pos, 3.2kV, by LC, with sheath gas |                |          |

## Accurate Mass Measurement

|                                                 |                           |
|-------------------------------------------------|---------------------------|
| Molecular formula :                             | $C_{161}H_{278}N_{16}O_9$ |
| Experimental Mass $[M+Na]^+$ , $[M+2Na]^{2+}$ : | 2604.17187, 1313.57975    |
| Theoretical Mass $[M+Na]^+$ , $[M+2Na]^{2+}$ :  | 2604.17120, 1313.58021    |
| Error (ppm) :                                   | 0.2, 0.3                  |

D:\Raw data\qhfc070\_170724191703

07/24/17 19:18:10

zk-OAT7

qhfc070\_170724191703 #2031-2230 RT: 9.08-9.97 AV: 200 SB: 389 €  
T: FTMS + p ESI Full ms [300.0000-3000.0000]

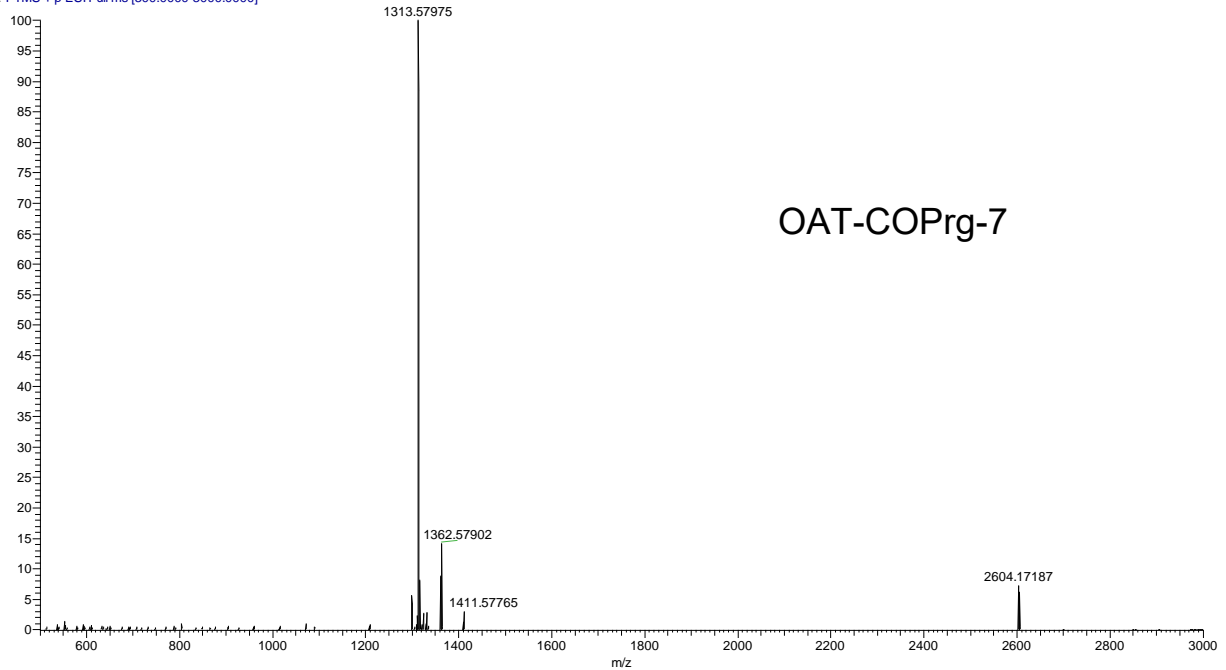

qhfc070\_170724191703 #2031-2230 RT: 9.08-9.97 AV: 200 SB: 389 6.03-7.76 NL: 2.70E4  
T: FTMS + p ESI Full ms [300.0000-3000.0000]

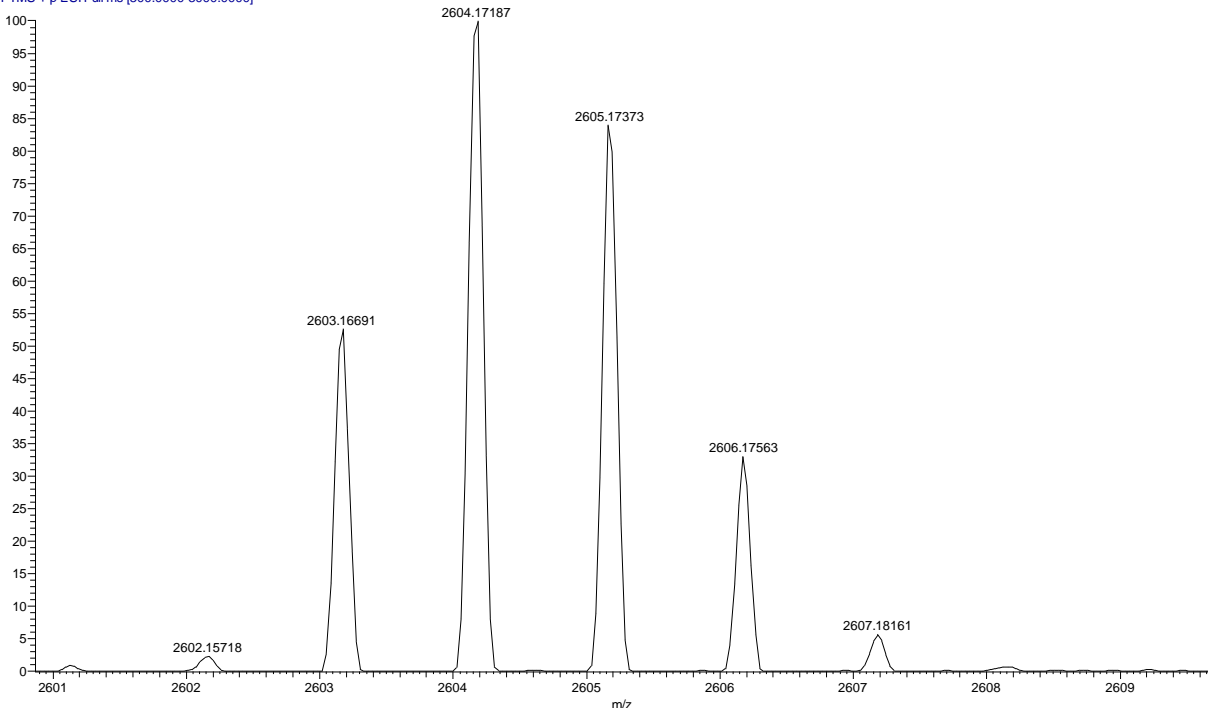

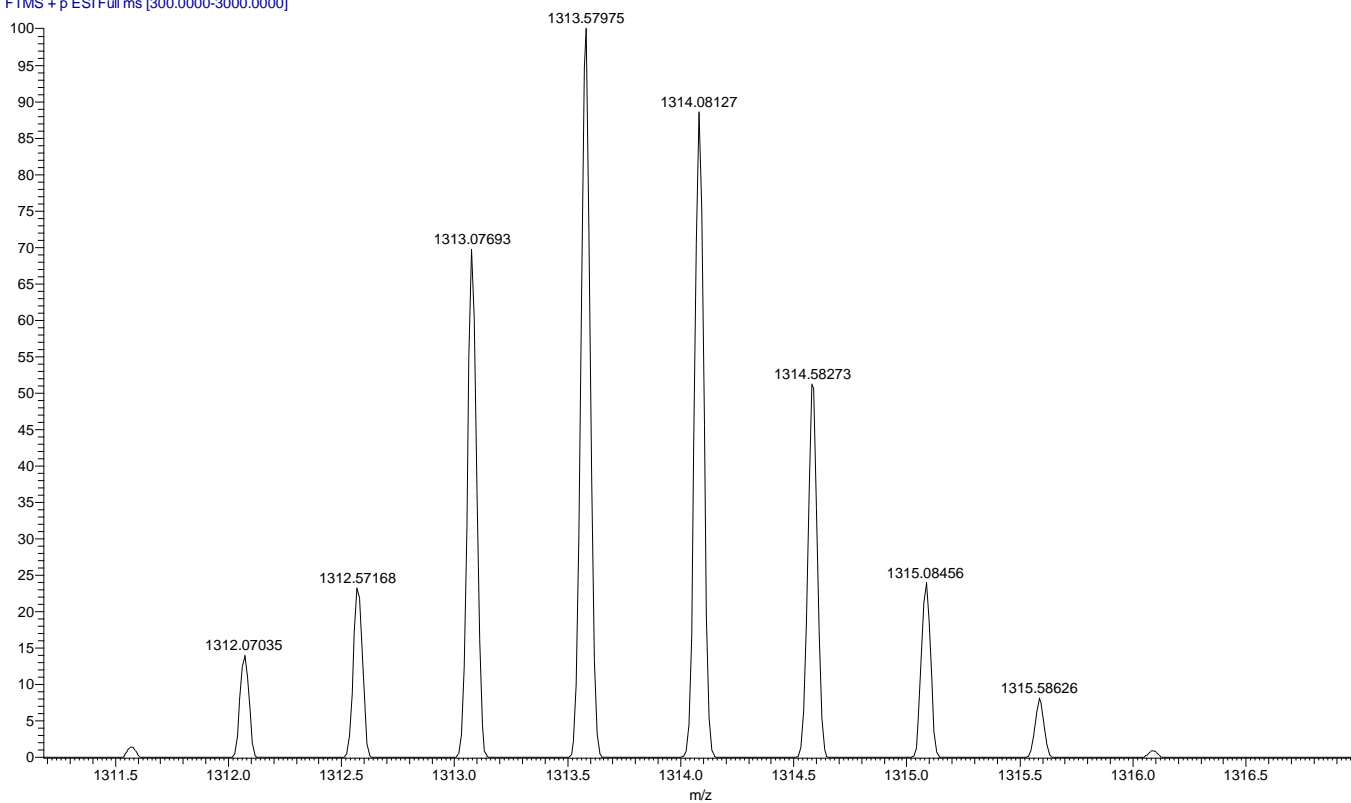

# Thermo QEFMS Analysis Report

## Analysis Info

|               |                                        |                |          |
|---------------|----------------------------------------|----------------|----------|
| Sample Name : | Zk-OAT8                                | Reference No.: | Qhfc071  |
| Instrument :  | Q Exactive Focus Orbitrap              |                |          |
| Source :      | HESI II                                | Polarity :     | Positive |
| Comment :     | ESI pos, 3.2kV, by LC, with sheath gas |                |          |

## Accurate Mass Measurement

|                                                                     |                                                                   |
|---------------------------------------------------------------------|-------------------------------------------------------------------|
| Molecular formula :                                                 | C <sub>200</sub> H <sub>346</sub> N <sub>20</sub> O <sub>12</sub> |
| Experimental Mass [M+2Na] <sup>2+</sup> , [M-H+3Na] <sup>2+</sup> : | 1634.34526, 1645.33678                                            |
| Theoretical Mass [M+2Na] <sup>2+</sup> , [M-H+3Na] <sup>2+</sup> :  | 1634.34637, 1645.33734                                            |
| Error (ppm) :                                                       | 0.6, 0.3                                                          |

D:\Raw data\qhfc071\_170724192813

07/24/17 19:29:18

zk-OAT8

qhfc071\_170724192813 #2135-2231 RT: 9.58-10.01 AV: 97 SB: 380  
T: FTMS + p ESI Full ms [300.0000-3000.0000]

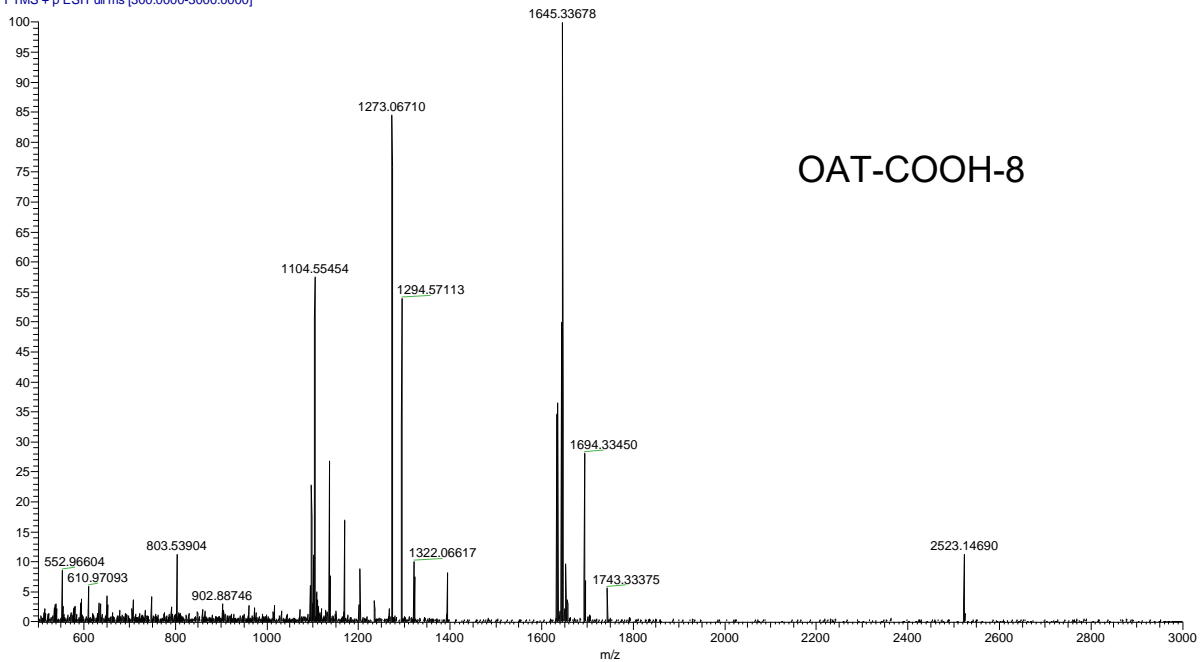

qhfc071\_170724192813 #2135-2231 RT: 9.58-10.01 AV: 97 SB: 380 6.65-8.34 NL: 8.62E4  
T: FTMS + p ESI Full ms [300.0000-3000.0000]

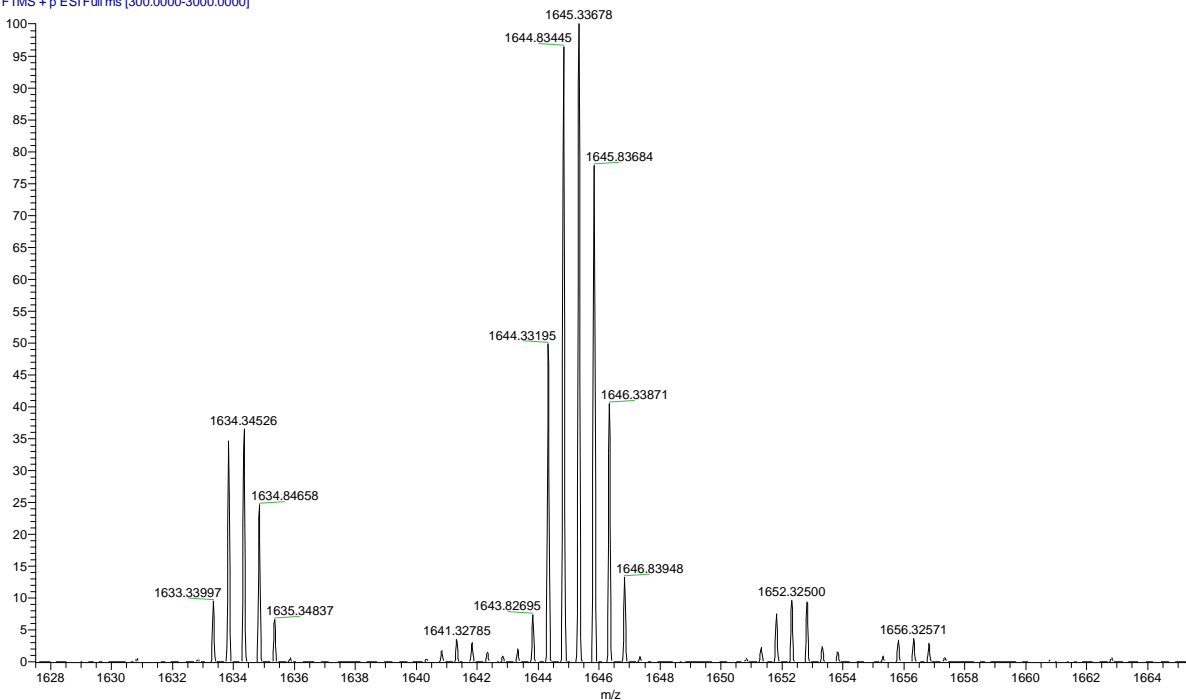

qhfc071\_170724192813 #2135-2231 RT: 9.58-10.01 AV: 97 SB: 380 6.65-8.34 NL: 8.62E4  
T: FTMS + p ESI Full ms [300.0000-3000.0000]

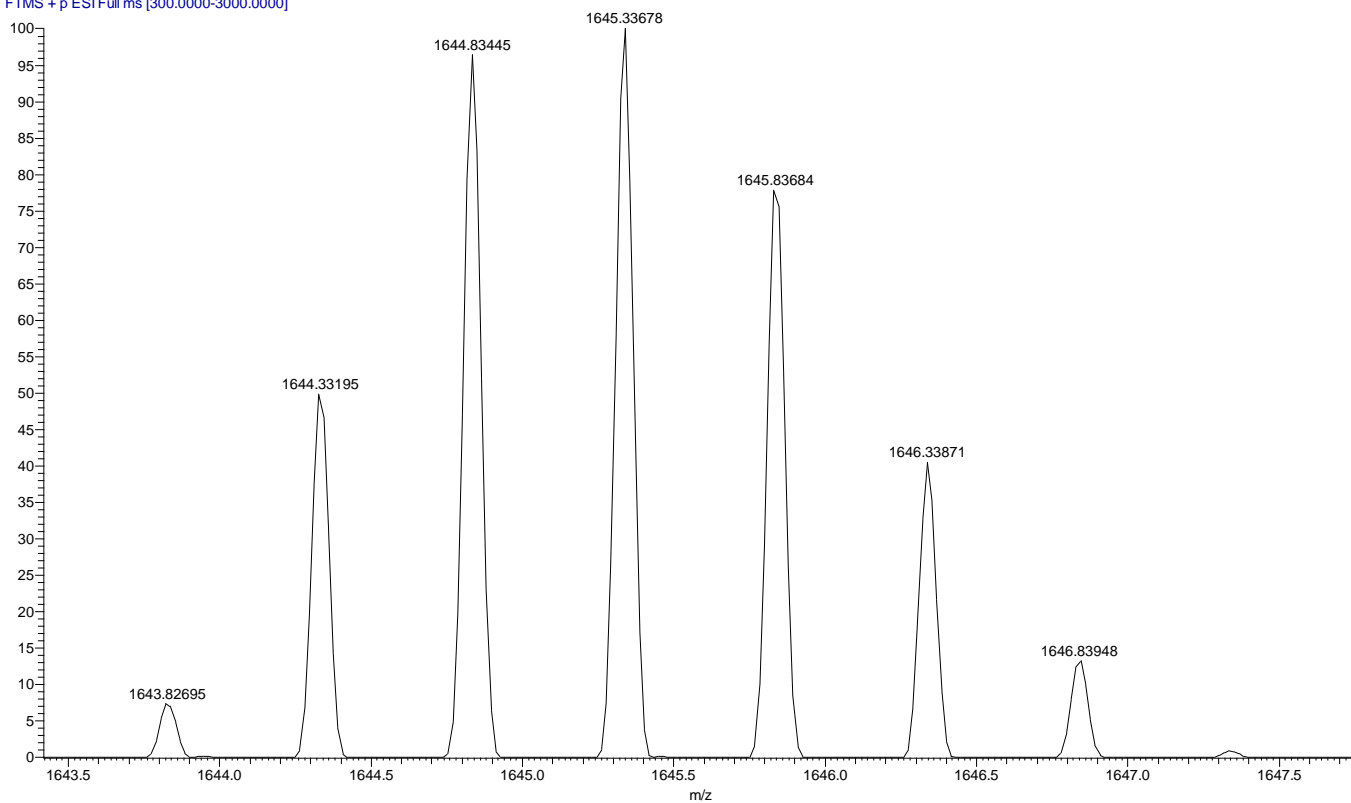

qhfc071\_170724192813 #2135-2231 RT: 9.58-10.01 AV: 97 SB: 380 6.65-8.34 NL: 3.14E4  
T: FTMS + p ESI Full ms [300.0000-3000.0000]

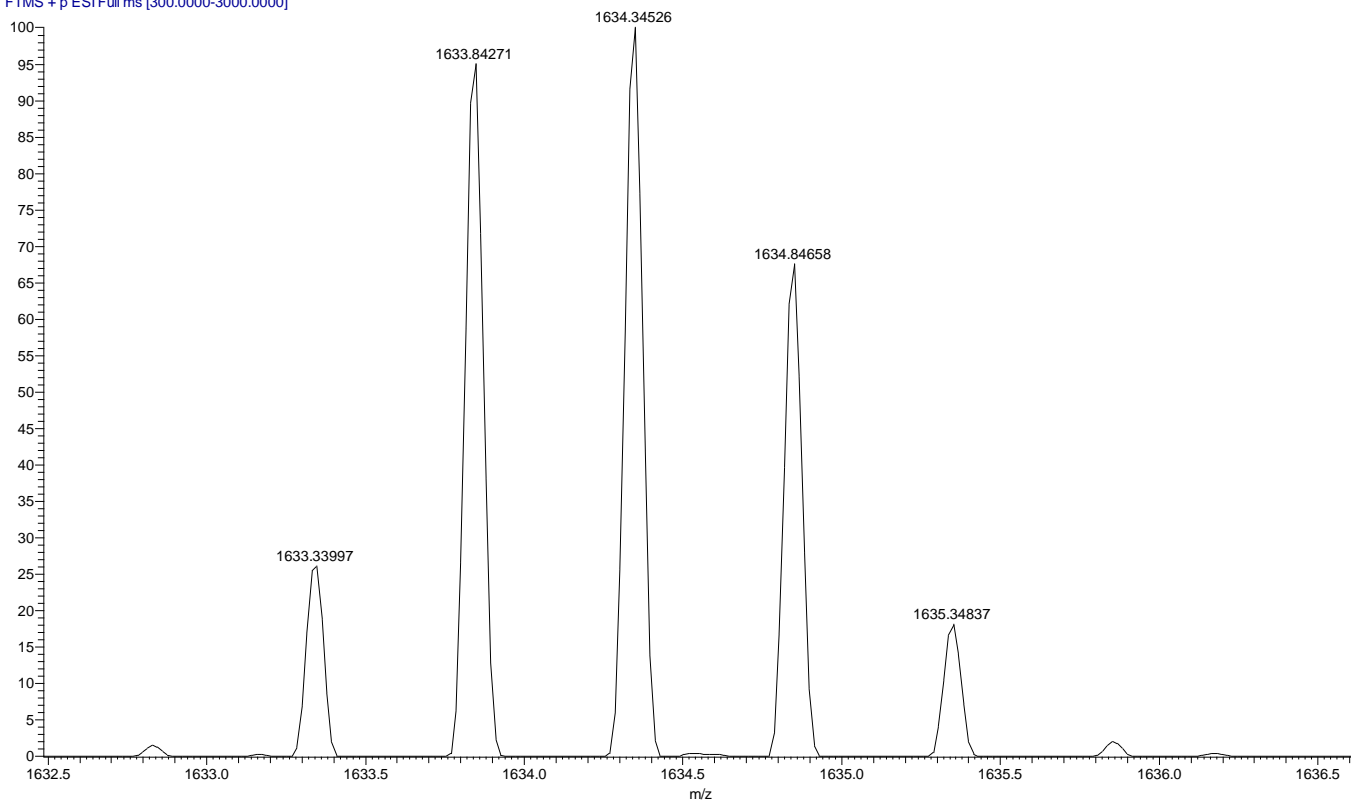

# Bruker Autoflex speed MALDI-TOF MS Analysis Report

Department of Chemistry, The Chinese University of Hong Kong

## Analysis Info

Sample Name: zk-OAT9 Reference No.: wfhfc068\0\_C1\3  
Applicant Name: Zheng Kun Date of Analysis : 2018-02-13T15:16:33.000  
Method: D:\Methods\flexControlMethods\Test\_RP\_1000-4500\_Da.par  
Polarity: POS PIE delay: 150 ns No. of shots: 800  
Comment: Reflector mode, DCTB as matrix, 384 polished stainless steel target plate

## Accurate Mass Measurement

Molecular formula: C<sub>203</sub>H<sub>349</sub>N<sub>21</sub>O<sub>11</sub>  
Abundant Isotopic (theoretical) [M+Na]<sup>+</sup>: 3282.7351  
Experimental [M+Na]<sup>+</sup>: 3282.7380  
Error (ppm): 0.88

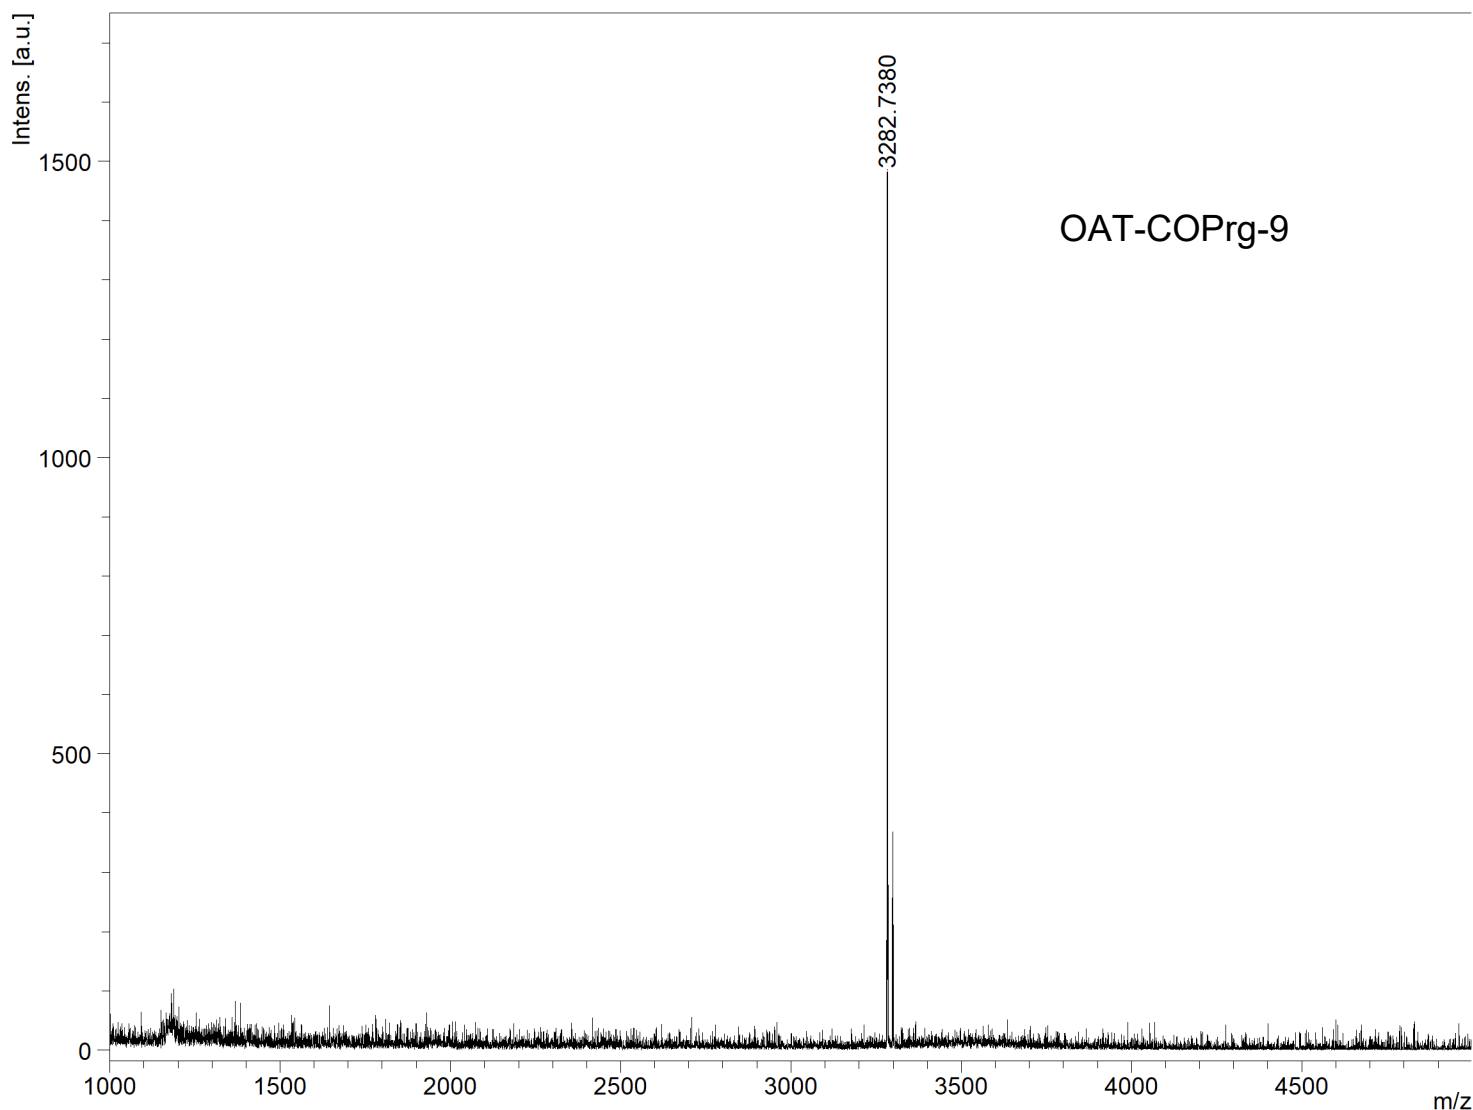

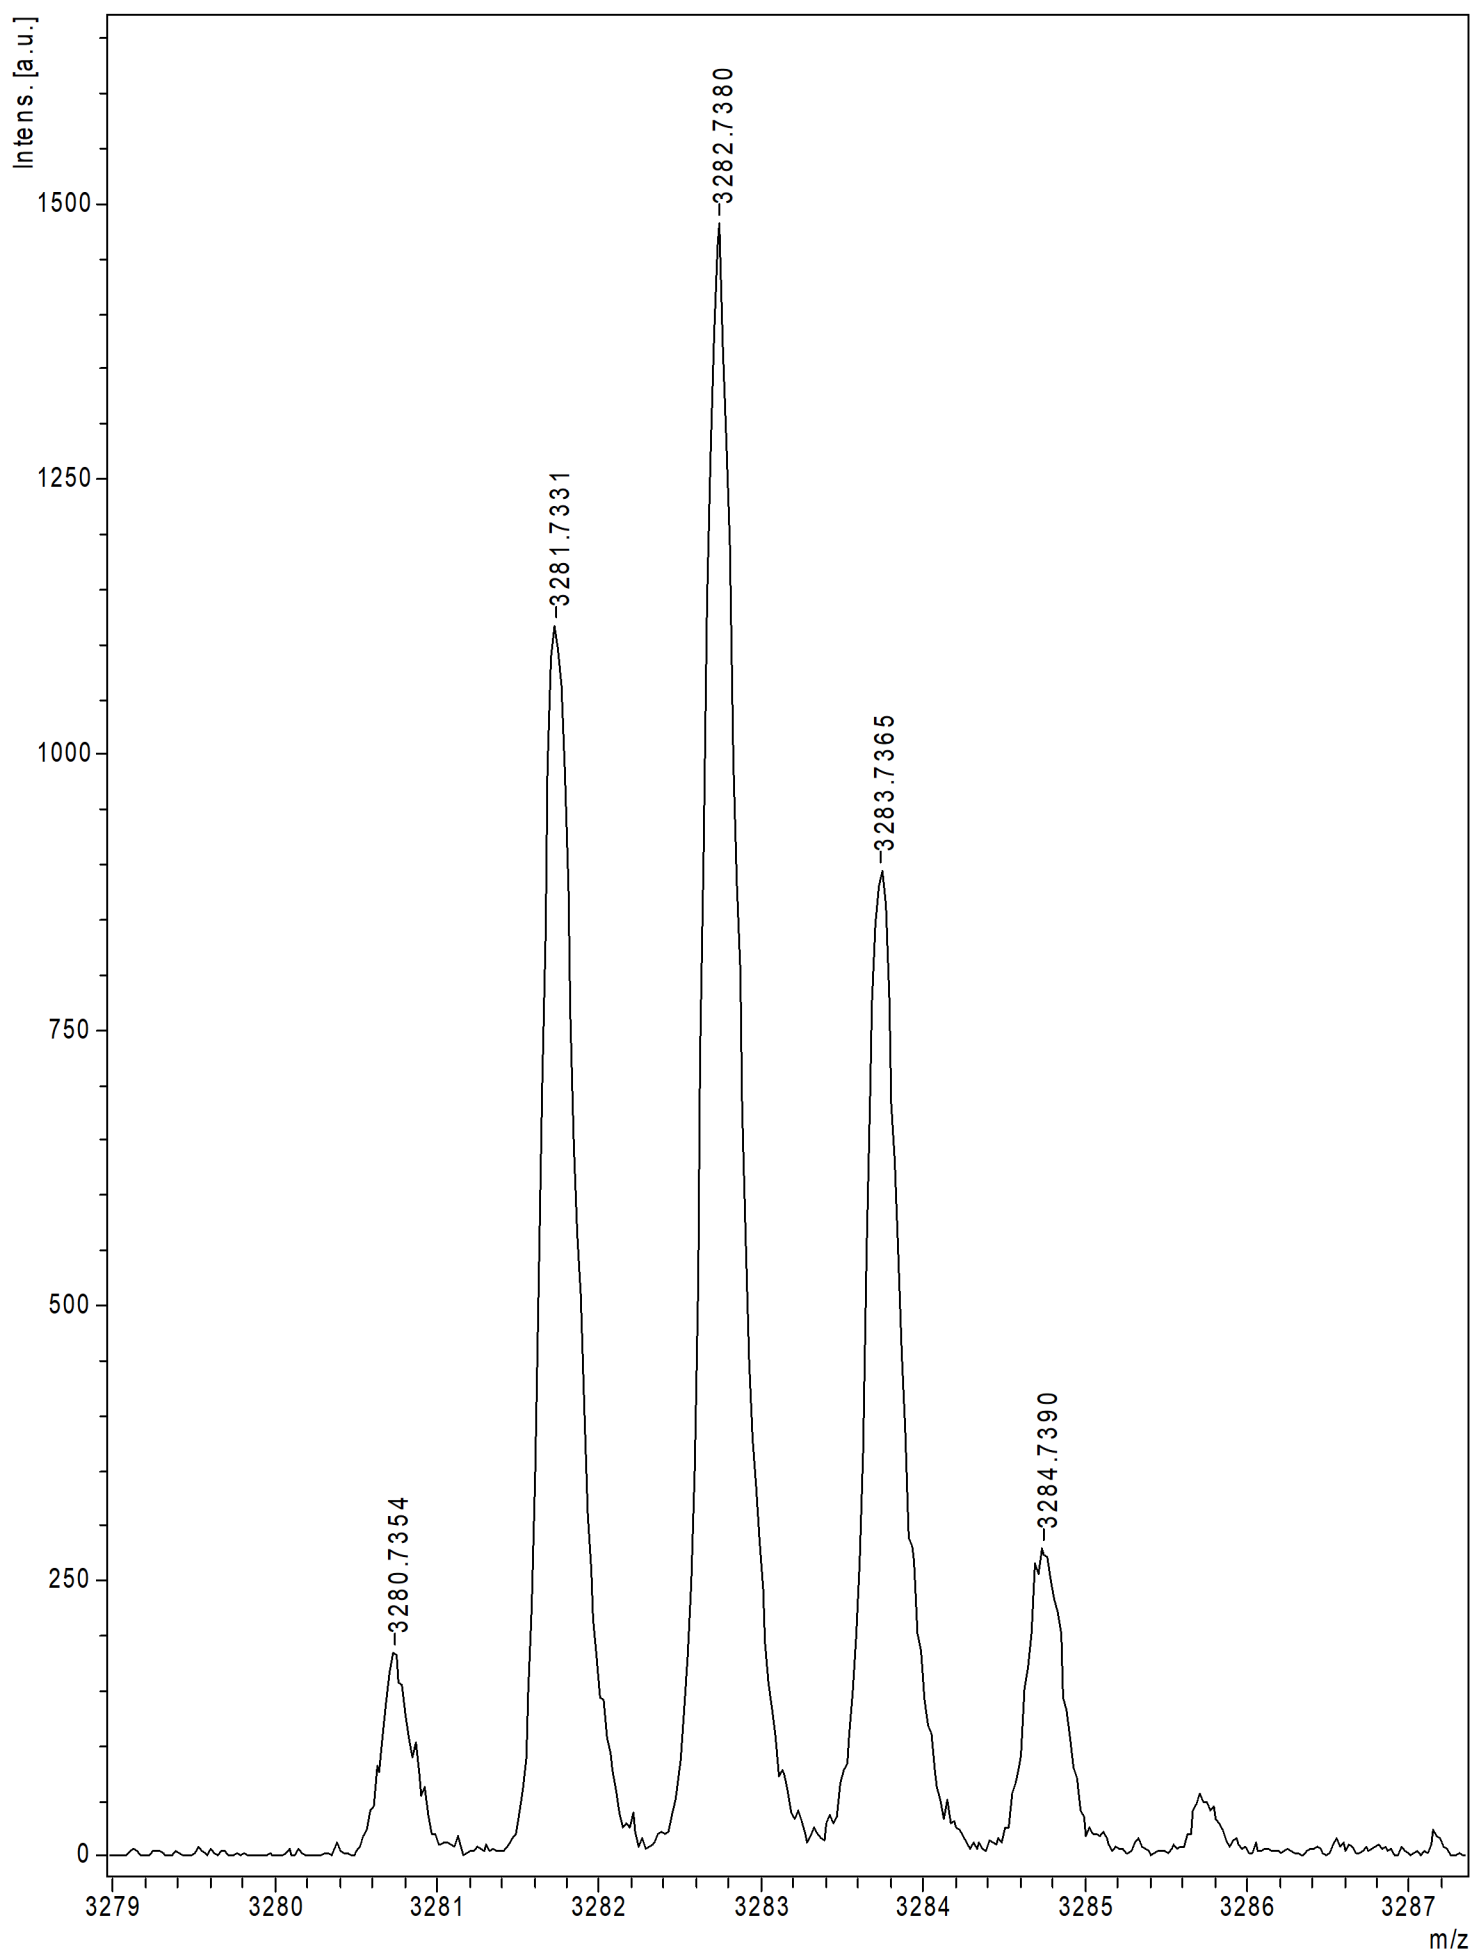



# Thermo QEFMS Analysis Report

## Analysis Info

|               |                                        |                |          |
|---------------|----------------------------------------|----------------|----------|
| Sample Name : | Zk-OAT10                               | Reference No.: | Qhfc073  |
| Instrument :  | Q Exactive Focus Orbitrap              |                |          |
| Source :      | HESI II                                | Polarity :     | Positive |
| Comment :     | ESI pos, 3.2kV, by LC, with sheath gas |                |          |

## Accurate Mass Measurement

|                                           |                                                                   |
|-------------------------------------------|-------------------------------------------------------------------|
| Molecular formula :                       | C <sub>242</sub> H <sub>417</sub> N <sub>25</sub> O <sub>14</sub> |
| Experimental Mass [M+2Na] <sup>2+</sup> : | 1973.12597                                                        |
| Theoretical Mass [M+2Na] <sup>2+</sup> :  | 1973.12675                                                        |
| Error (ppm) :                             | 0.3                                                               |

D:\Raw data\qhfc073\_170725164519

07/25/17 16:46:24

zk-OAT10

qhfc073\_170725164519 #82-129 RT: 0.37-0.58 AV: 48 SB: 257 0.40-0.66  
T: FTMS + p ESI Full ms [300.0000-3000.0000]

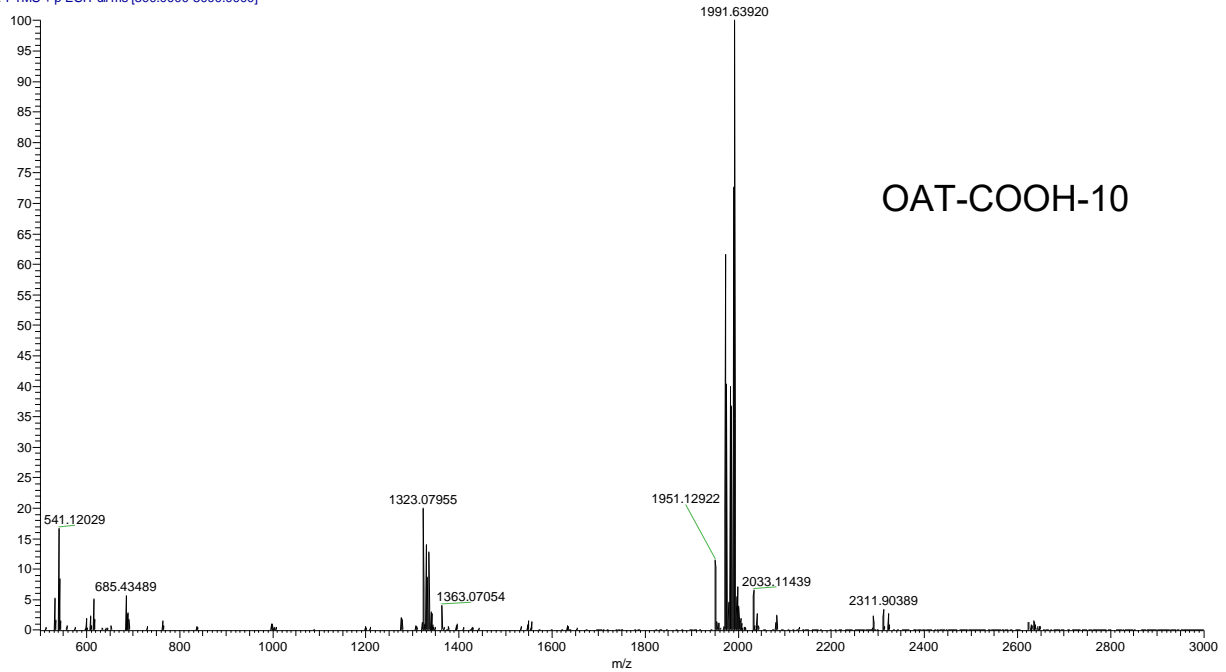

qhfc073\_170725164519 #82-129 RT: 0.37-0.58 AV: 48 SB: 257 0.40-0.66, 1.05-1.93 NL: 2.85E6  
T: FTMS + p ESI Full ms [300.0000-3000.0000]

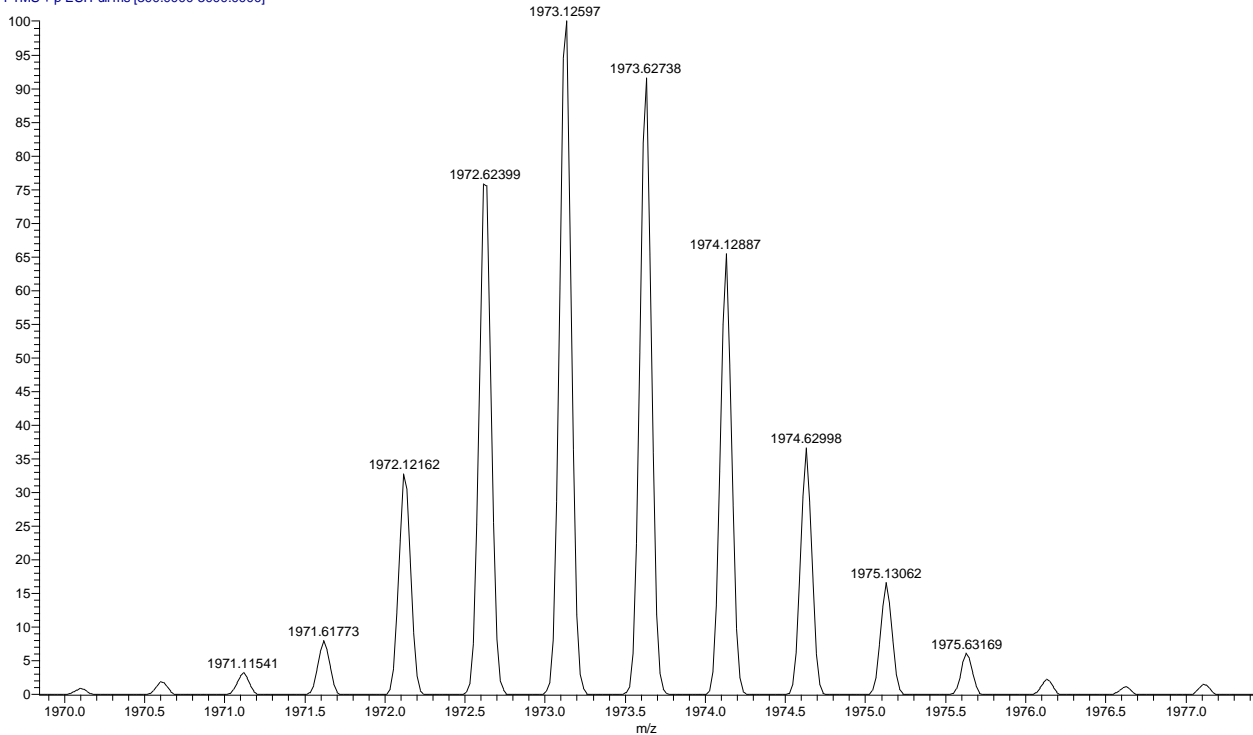

# Thermo QEFMS Analysis Report

## Analysis Info

|               |                                        |                |          |
|---------------|----------------------------------------|----------------|----------|
| Sample Name : | Zk-OAT11                               | Reference No.: | Qhfc074  |
| Instrument :  | Q Exactive Focus Orbitrap              |                |          |
| Source :      | HESI II                                | Polarity :     | Positive |
| Comment :     | ESI pos, 3.2kV, by LC, with sheath gas |                |          |

## Accurate Mass Measurement

|                                    |                              |
|------------------------------------|------------------------------|
| Molecular formula :                | $C_{245}H_{420}N_{26}O_{13}$ |
| Experimental Mass $[M+2Na]^{2+}$ : | 1991.64290                   |
| Theoretical Mass $[M+2Na]^{2+}$ :  | 1991.64257                   |
| Error (ppm) :                      | 0.1                          |

D:\Raw data\qhfc074\_170725170428

07/25/17 17:05:33

zk-OAT11

qhfc074\_170725170428 #105 RT: 0.47 AV: 1 SB: 256 0.40-0.66 , 1.05  
T: FTMS + p ESI Full ms [300.0000-3000.0000]

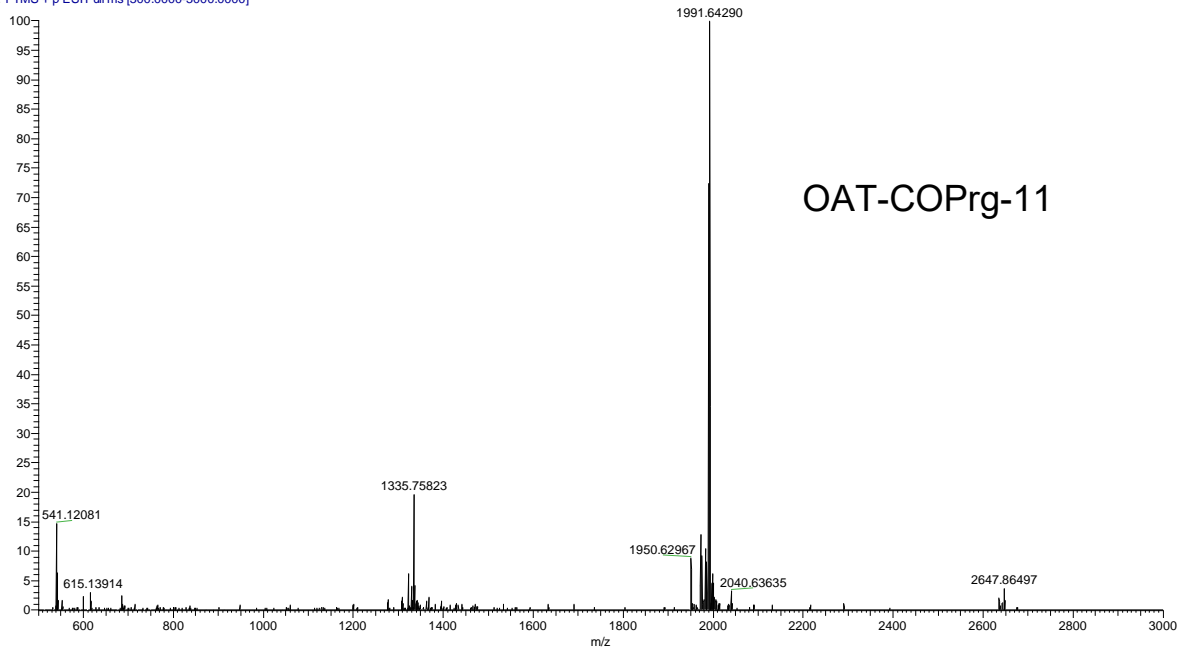

qhfc074\_170725170428 #105 RT: 0.47 AV: 1 SB: 256 0.40-0.66 , 1.05-1.93 NL: 1.10E7  
T: FTMS + p ESI Full ms [300.0000-3000.0000]

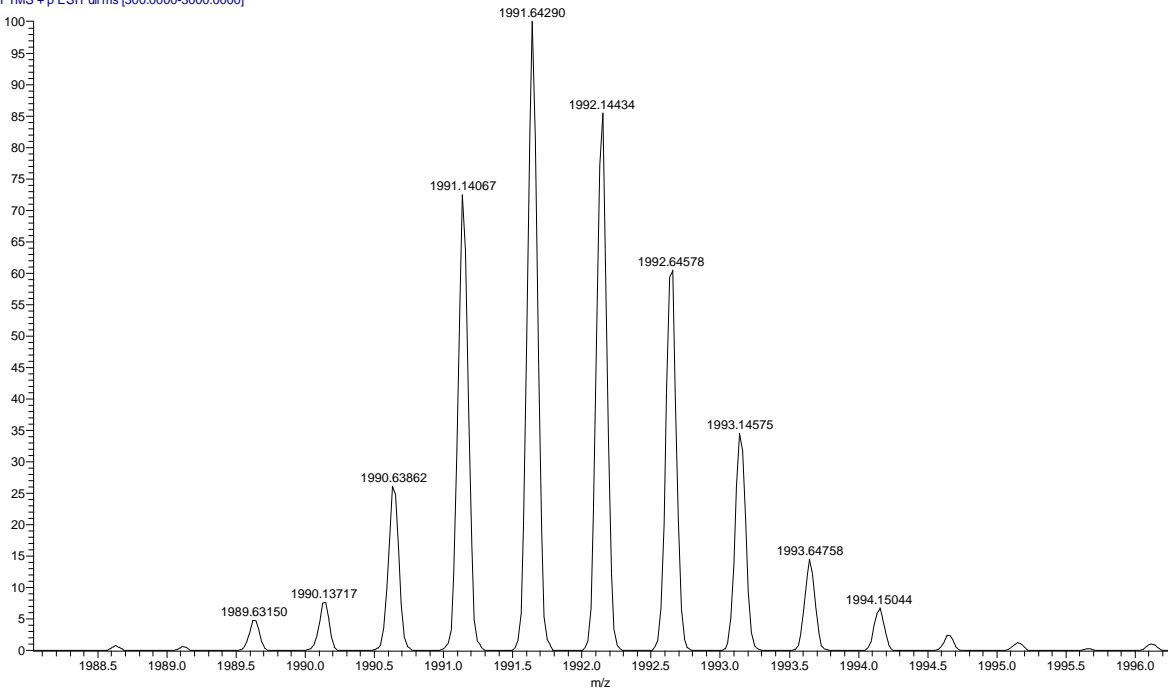

# Thermo QEFMS Analysis Report

## Analysis Info

|               |                                        |                |          |
|---------------|----------------------------------------|----------------|----------|
| Sample Name : | Zk-OAT12                               | Reference No.: | Qhfc075  |
| Instrument :  | Q Exactive Focus Orbitrap              |                |          |
| Source :      | HESI II                                | Polarity :     | Positive |
| Comment :     | ESI pos, 3.2kV, by LC, with sheath gas |                |          |

## Accurate Mass Measurement

|                                                     |                              |
|-----------------------------------------------------|------------------------------|
| Molecular formula :                                 | $C_{284}H_{488}N_{30}O_{16}$ |
| Experimental Mass $[M+2Na]^{2+}$ , $[M+3Na]^{3+}$ : | 2312.40924, 1549.26805       |
| Theoretical Mass $[M+2Na]^{2+}$ , $[M+3Na]^{3+}$ :  | 2312.40872, 1549.26889       |
| Error (ppm) :                                       | 0.2, 0.5                     |

D:\Raw data\qhfc075\_170725155042

07/25/17 15:51:52

zk-OAT12

qhfc075\_170725155042 #89 RT: 0.41 AV: 1 SB: 254 0.41-0.66, 1.05-  
T: FTMS + p ESI Full ms [300.0000-3000.0000]

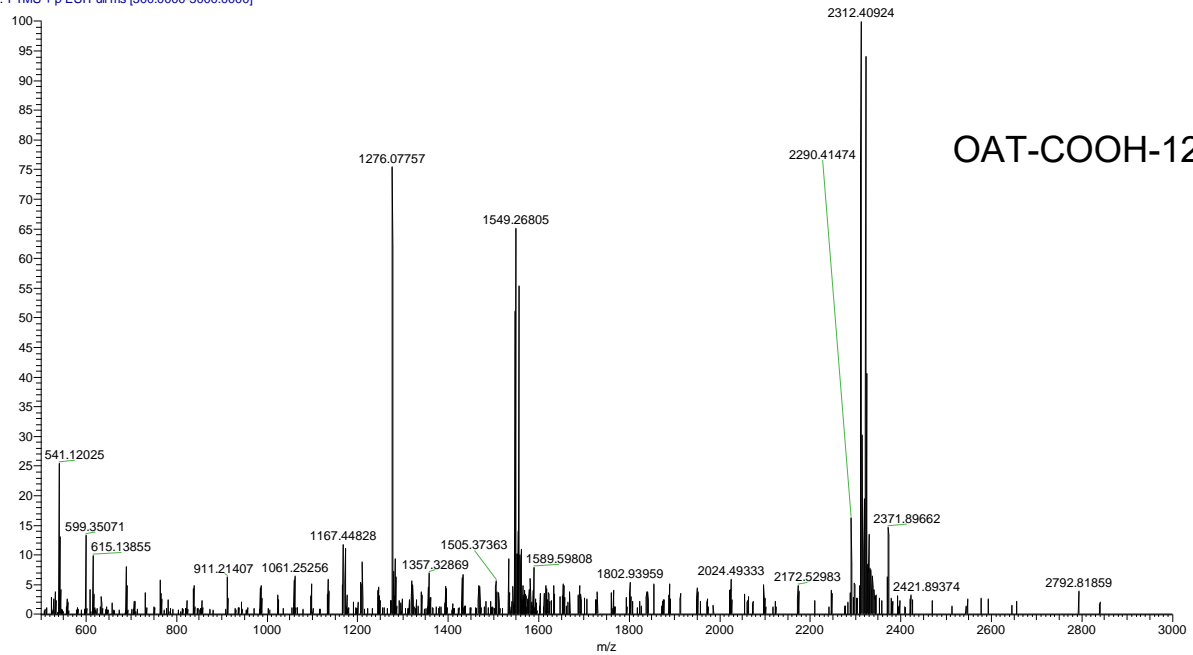

qhfc075\_170725155042 #89 RT: 0.41 AV: 1 SB: 254 0.41-0.66, 1.05-1.93 NL: 3.49E6  
T: FTMS + p ESI Full ms [300.0000-3000.0000]

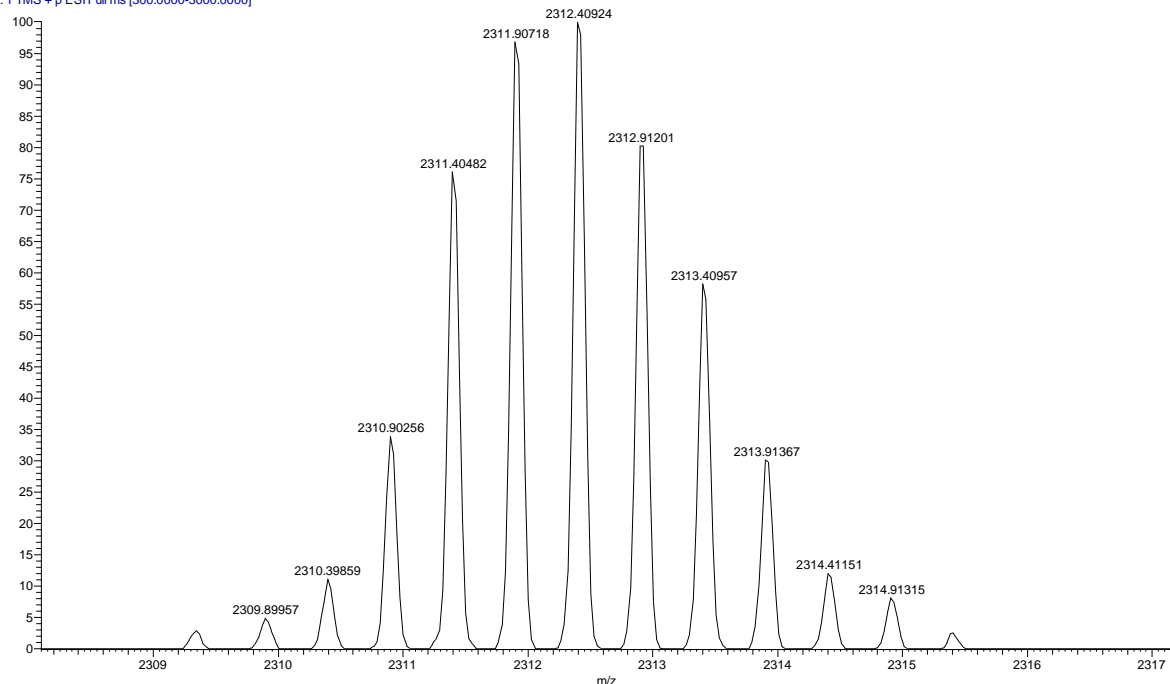

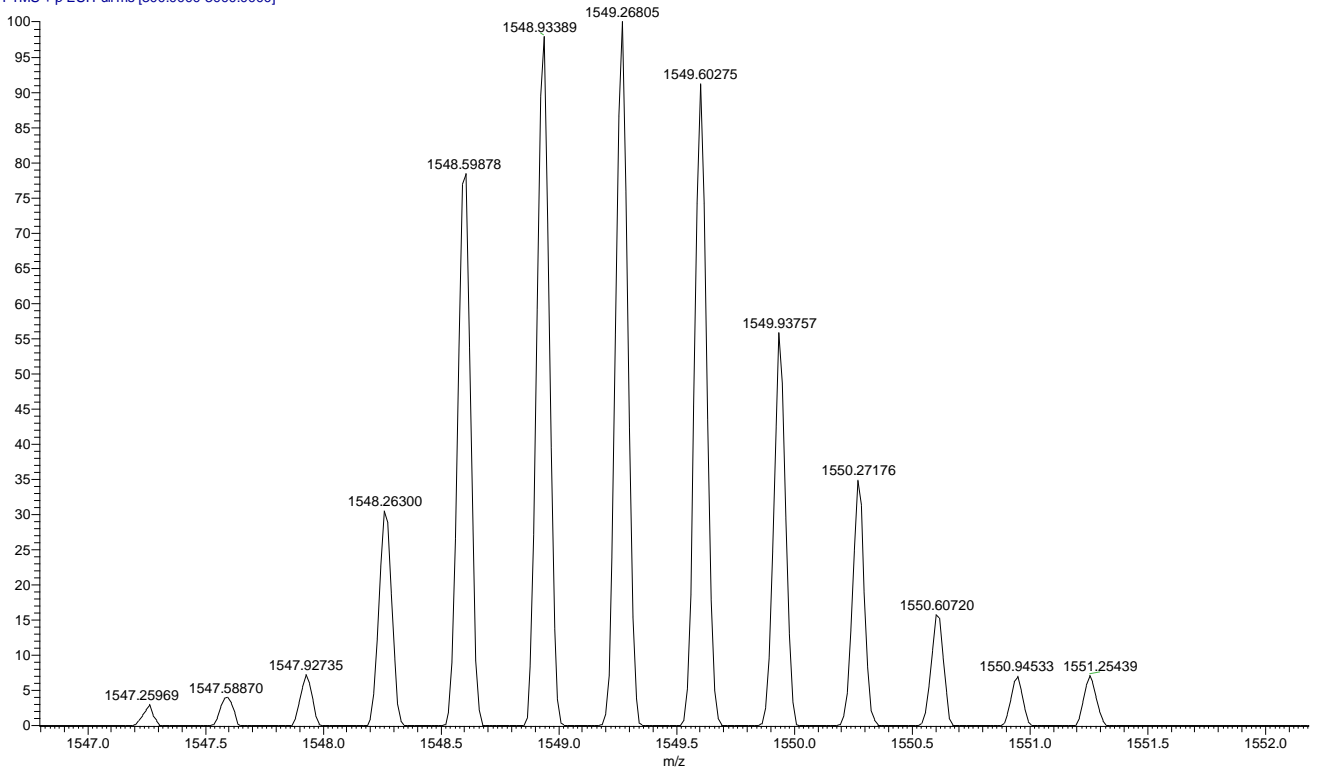

# Bruker Autoflex speed MALDI-TOF MS Analysis Report

Department of Chemistry, The Chinese University of Hong Kong

## Analysis Info

Sample Name: ZK-OAT7-prop Reference No.: wfhfc075\0\_C9\1  
Applicant Name: Zheng Kun Date of Analysis : 2018-04-25T15:17:52.000  
Method: D:\Methods\flexControlMethods\Test\_RP\_1000-4500\_Da.par  
Polarity: POS PIE delay: 150 ns No. of shots: 600  
Comment: Reflector mode, DCTB as matrix, 384 polished stainless steel target plate

## Accurate Mass Measurement

Molecular formula: C<sub>16</sub>H<sub>28</sub>N<sub>16</sub>O<sub>9</sub>  
Abundant Isotopic (theoretical) [M+H]<sup>+</sup>: 2586.2206  
Experimental [M+H]<sup>+</sup>: 2586.2221  
Error (ppm): 0.58

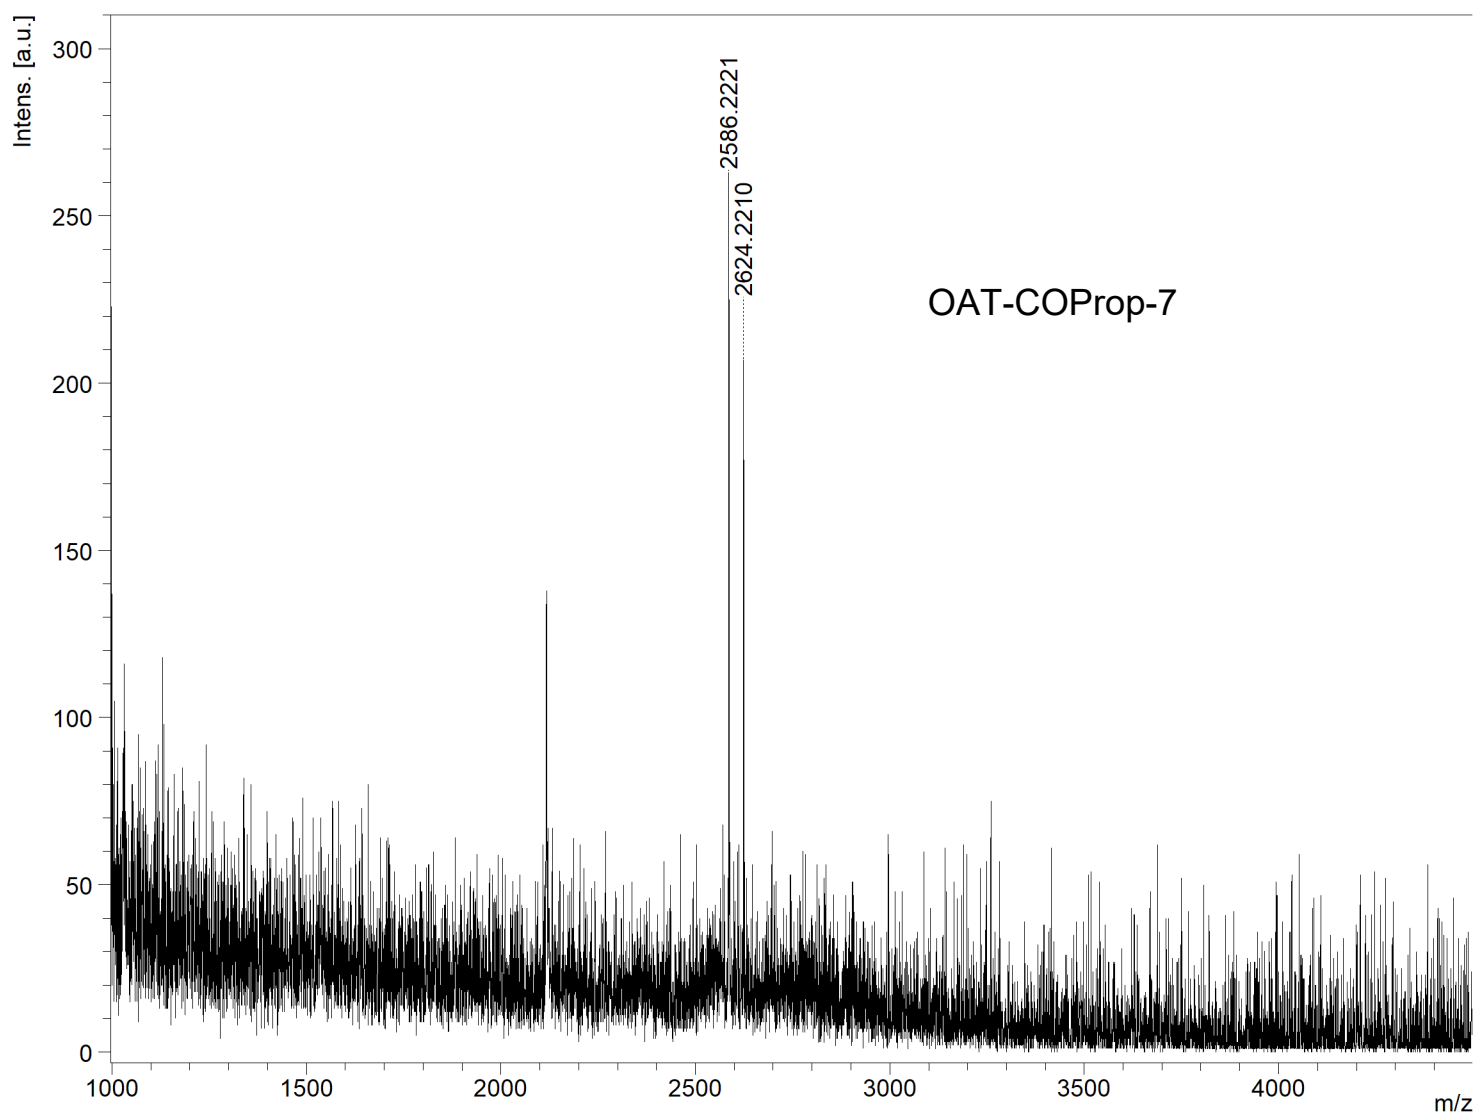

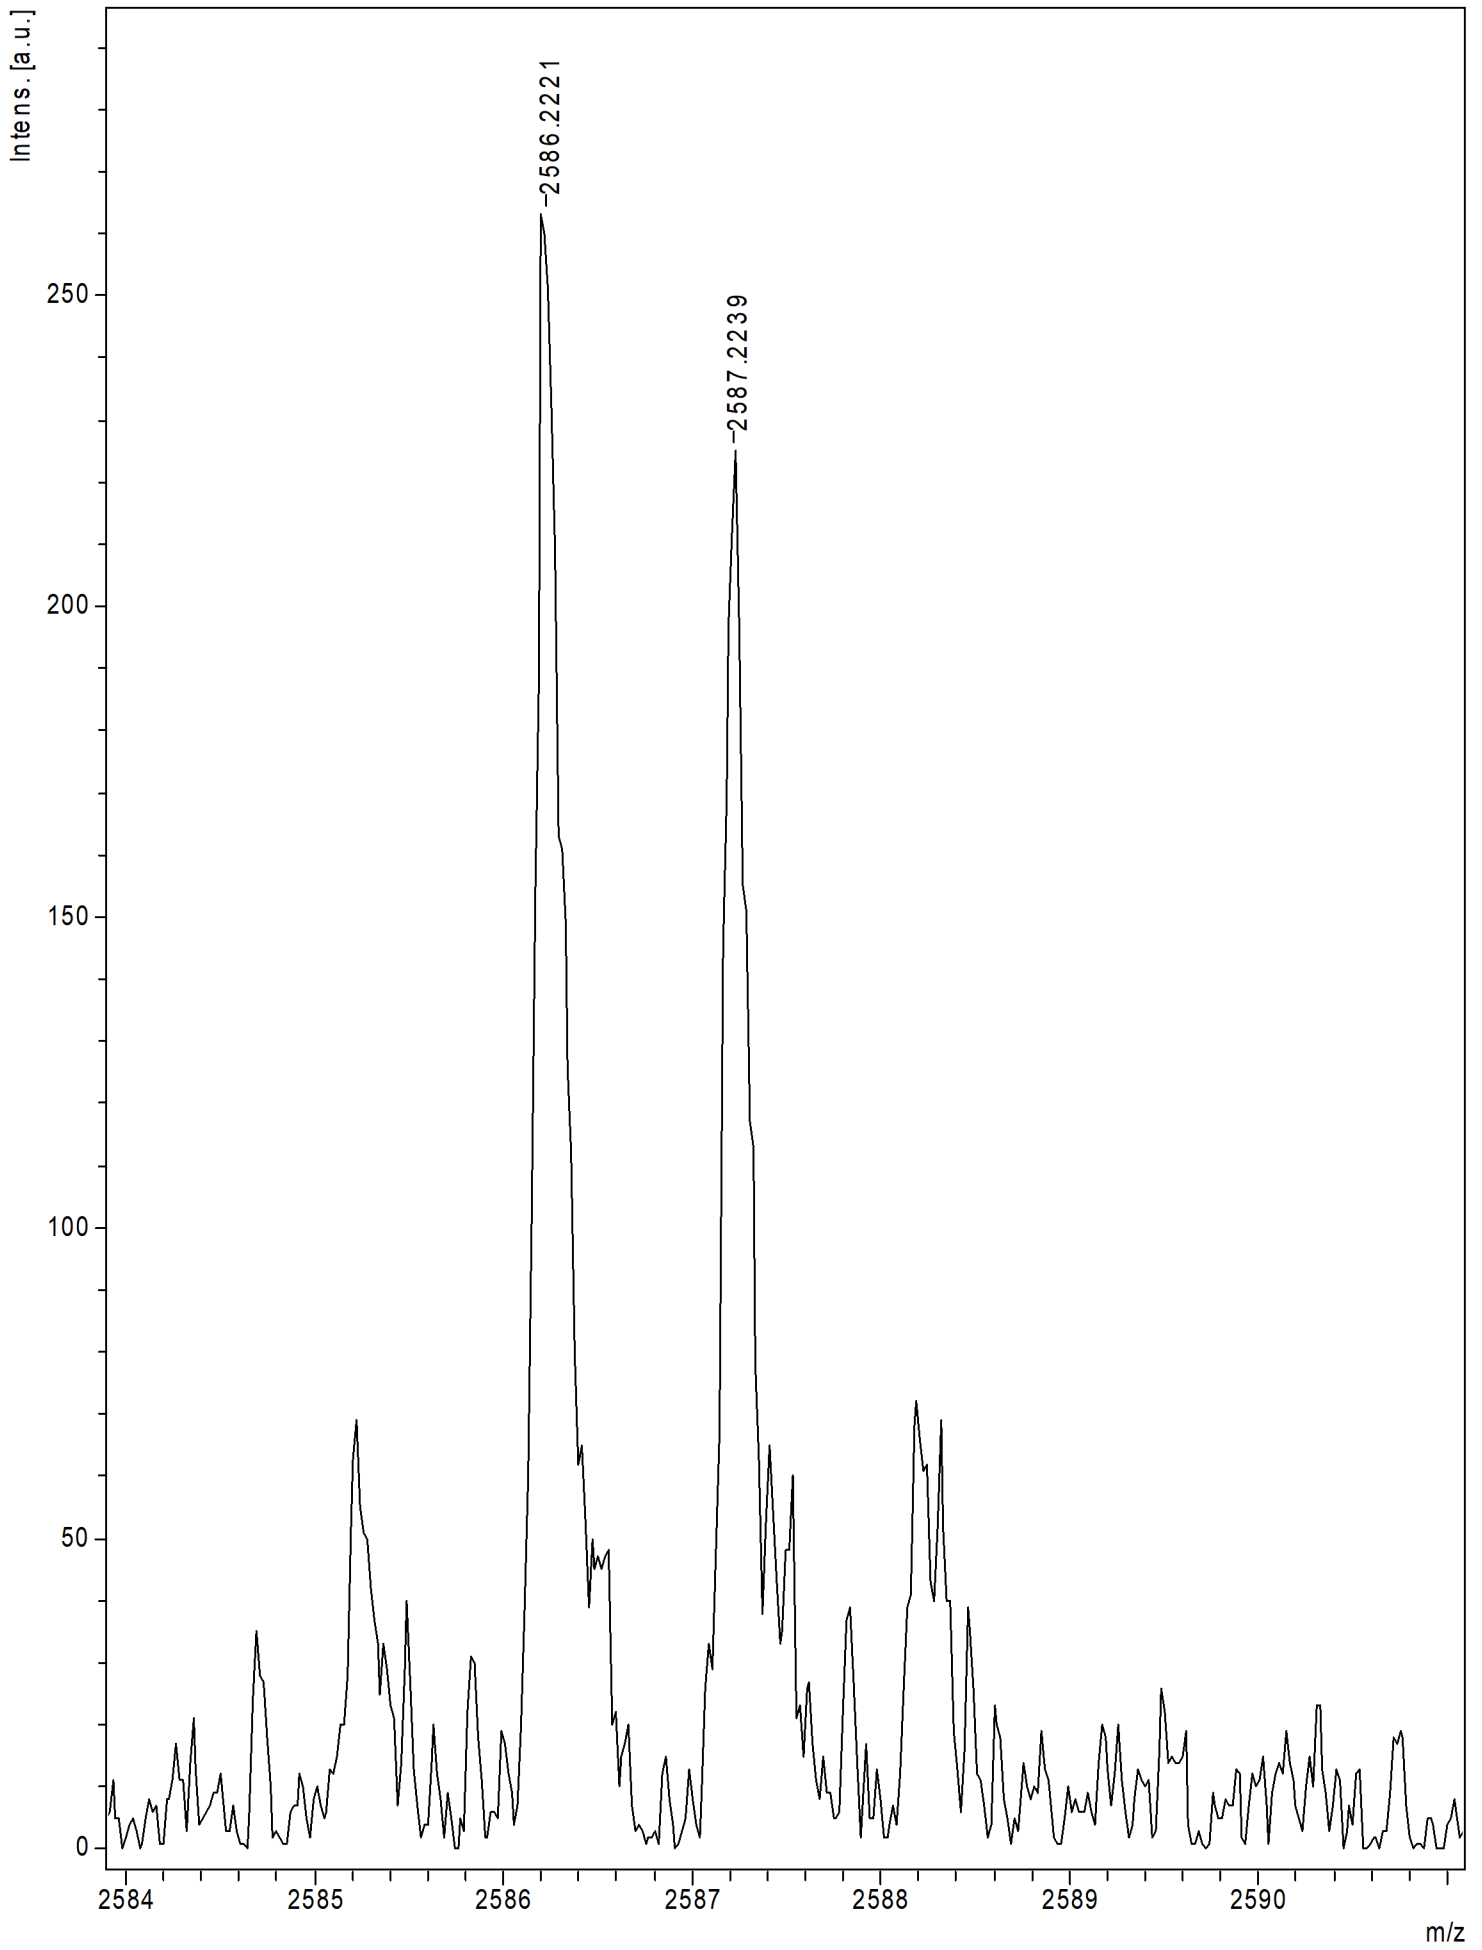

# Bruker Autoflex speed MALDI-TOF MS Analysis Report

Department of Chemistry, The Chinese University of Hong Kong

## Analysis Info

Sample Name: OAT6-a Reference No.: wfhfc065\0\_B2\1  
Applicant Name: Zheng Kun Date of Analysis : 2018-02-13T16:10:04.000  
Method: D:\Methods\flexControlMethods\Test\_RP\_1000-4500\_Da.par  
Polarity: POS PIE delay: 150 ns No. of shots: 400  
Comment: Reflector mode, DCTB as matrix, 384 polished stainless steel target plate

## Accurate Mass Measurement

Molecular formula: C<sub>15</sub>H<sub>27</sub>N<sub>15</sub>O<sub>8</sub>  
Abundant Isotopic (theoretical) [M+Na]<sup>+</sup>: 2523.1497  
Experimental [M+Na]<sup>+</sup>: 2523.1495  
Error (ppm): 0.08

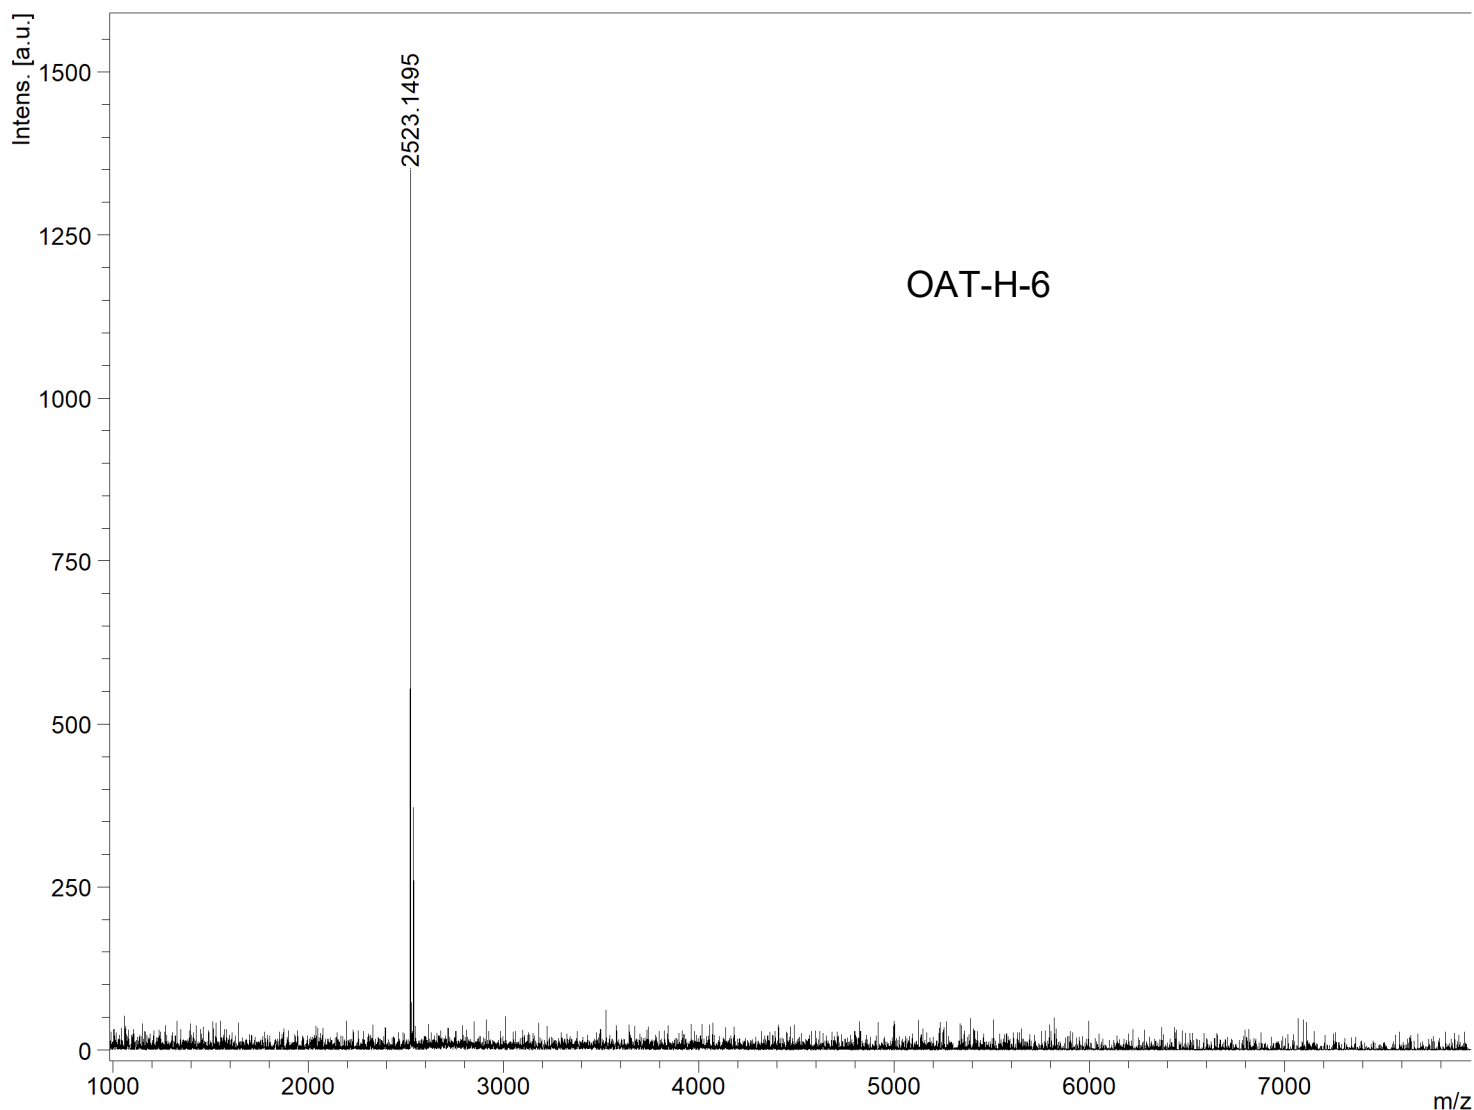

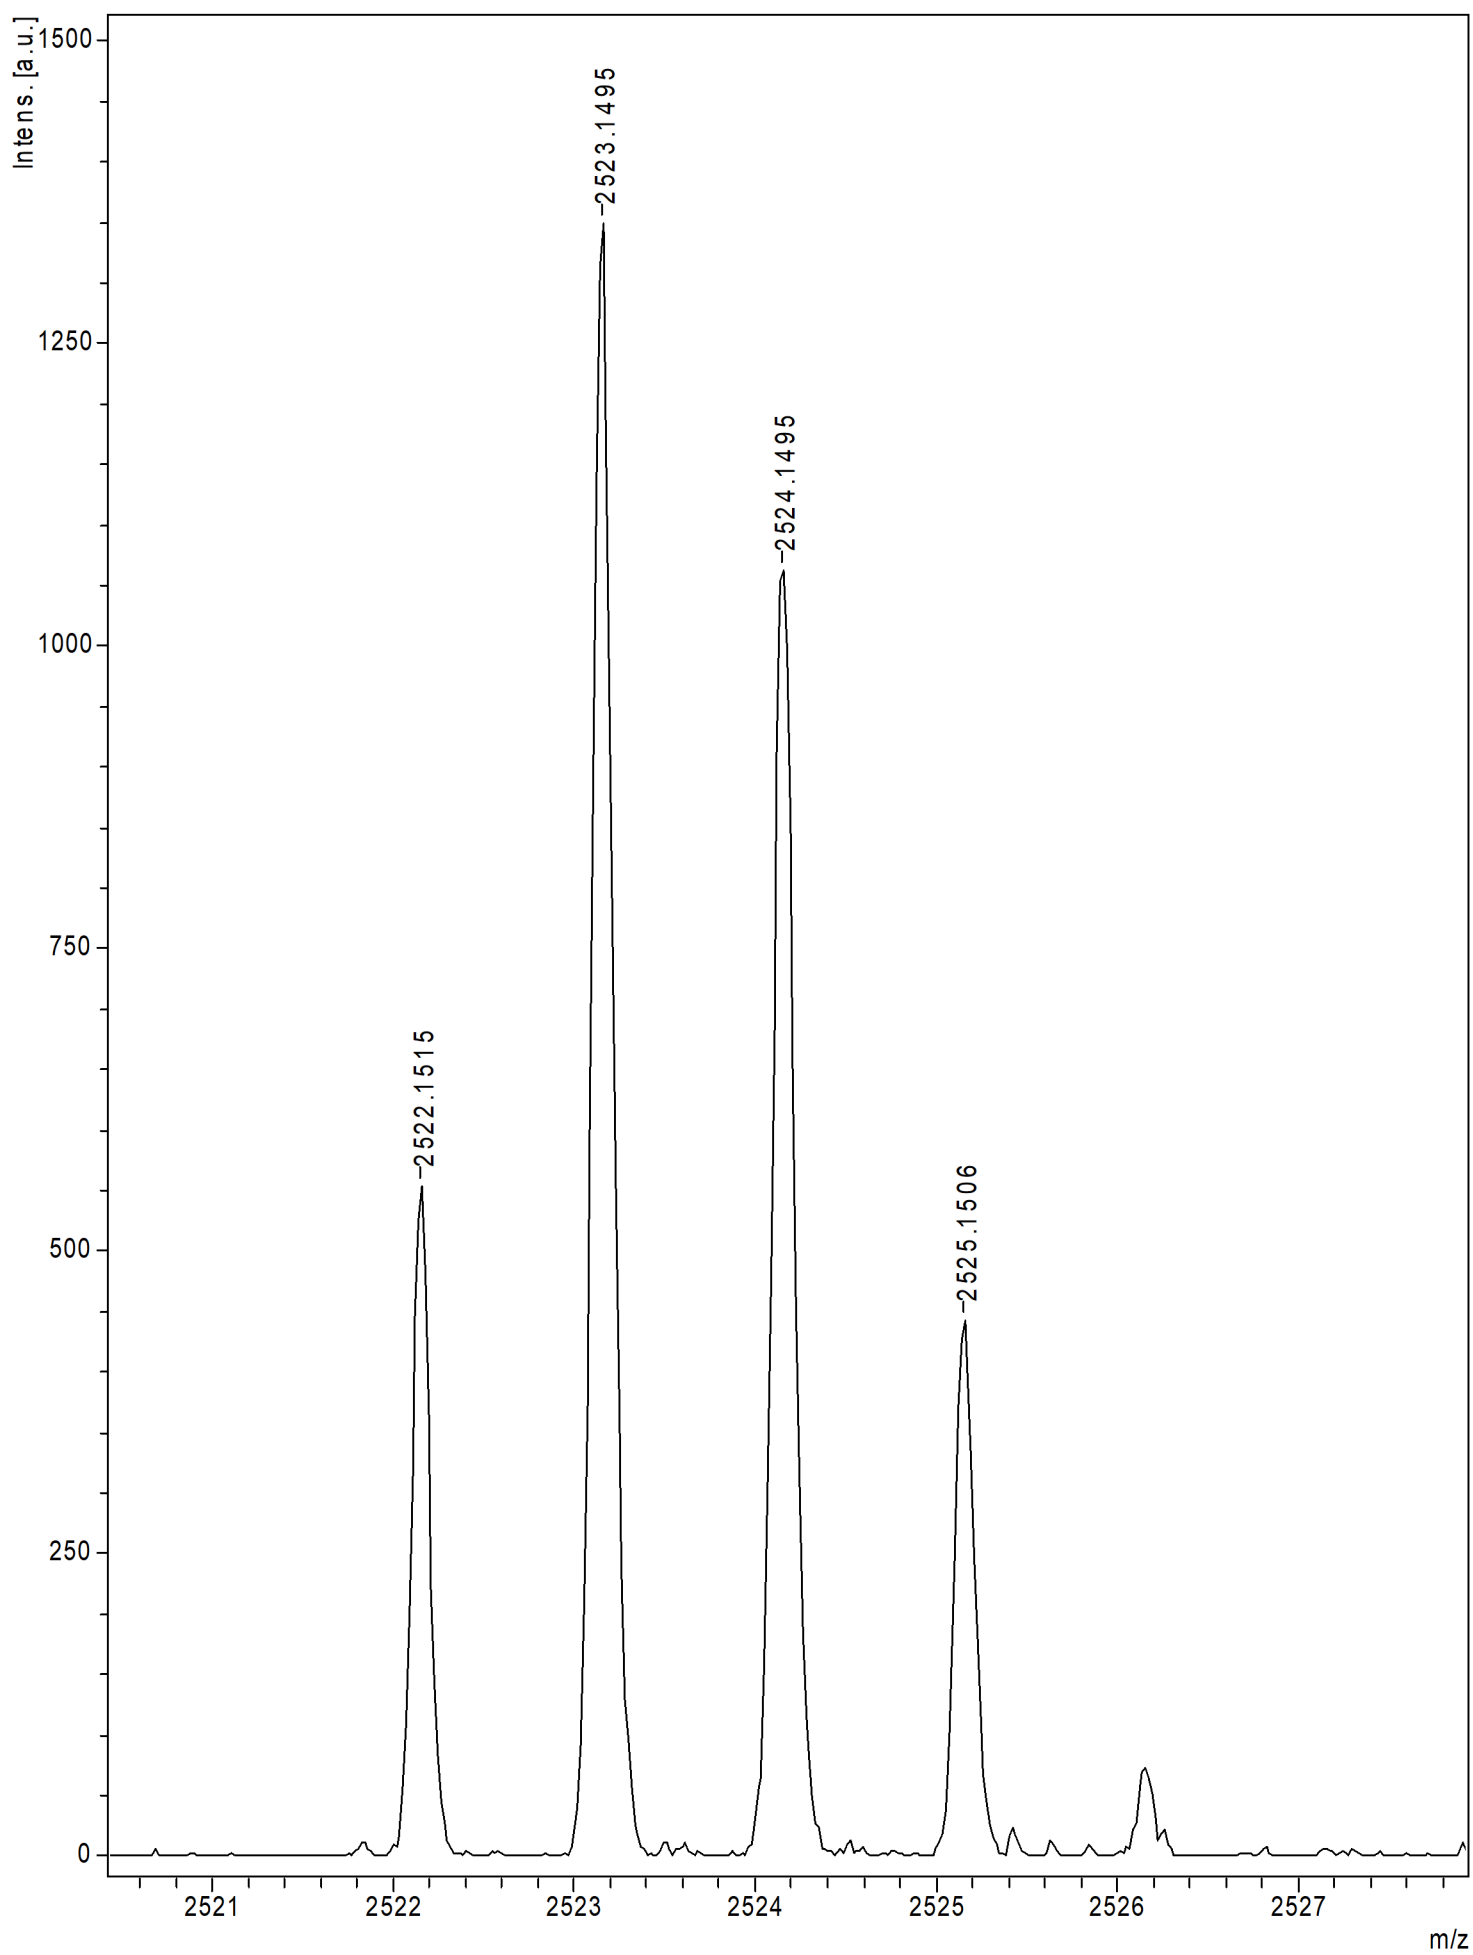



---

# Bruker Autoflex speed MALDI-TOF MS Analysis Report

---

Department of Chemistry, The Chinese University of Hong Kong

---

## Analysis Info

|                 |                                                                           |                    |                         |               |     |
|-----------------|---------------------------------------------------------------------------|--------------------|-------------------------|---------------|-----|
| Sample Name:    | OAT8-a                                                                    | Reference No.:     | wfhfc066\0_B1\2         |               |     |
| Applicant Name: | Zheng Kun                                                                 | Date of Analysis : | 2018-02-13T15:30:47.000 |               |     |
| Method:         | D:\Methods\flexControlMethods\Test_RP_1000-4500_Da.par                    |                    |                         |               |     |
| Polarity:       | POS                                                                       | PIE delay:         | 150 ns                  | No. of shots: | 400 |
| Comment:        | Reflector mode, DCTB as matrix, 384 polished stainless steel target plate |                    |                         |               |     |

---

## Accurate Mass Measurement

|                                                       |                |
|-------------------------------------------------------|----------------|
| Molecular formula:                                    | C199H346N20O10 |
| Abundant Isotopic (theoretical) [M+Na] <sup>+</sup> : | 3201.7137      |
| Experimental [M+Na] <sup>+</sup> :                    | 3201.7151      |
| Error (ppm):                                          | 0.44           |

---

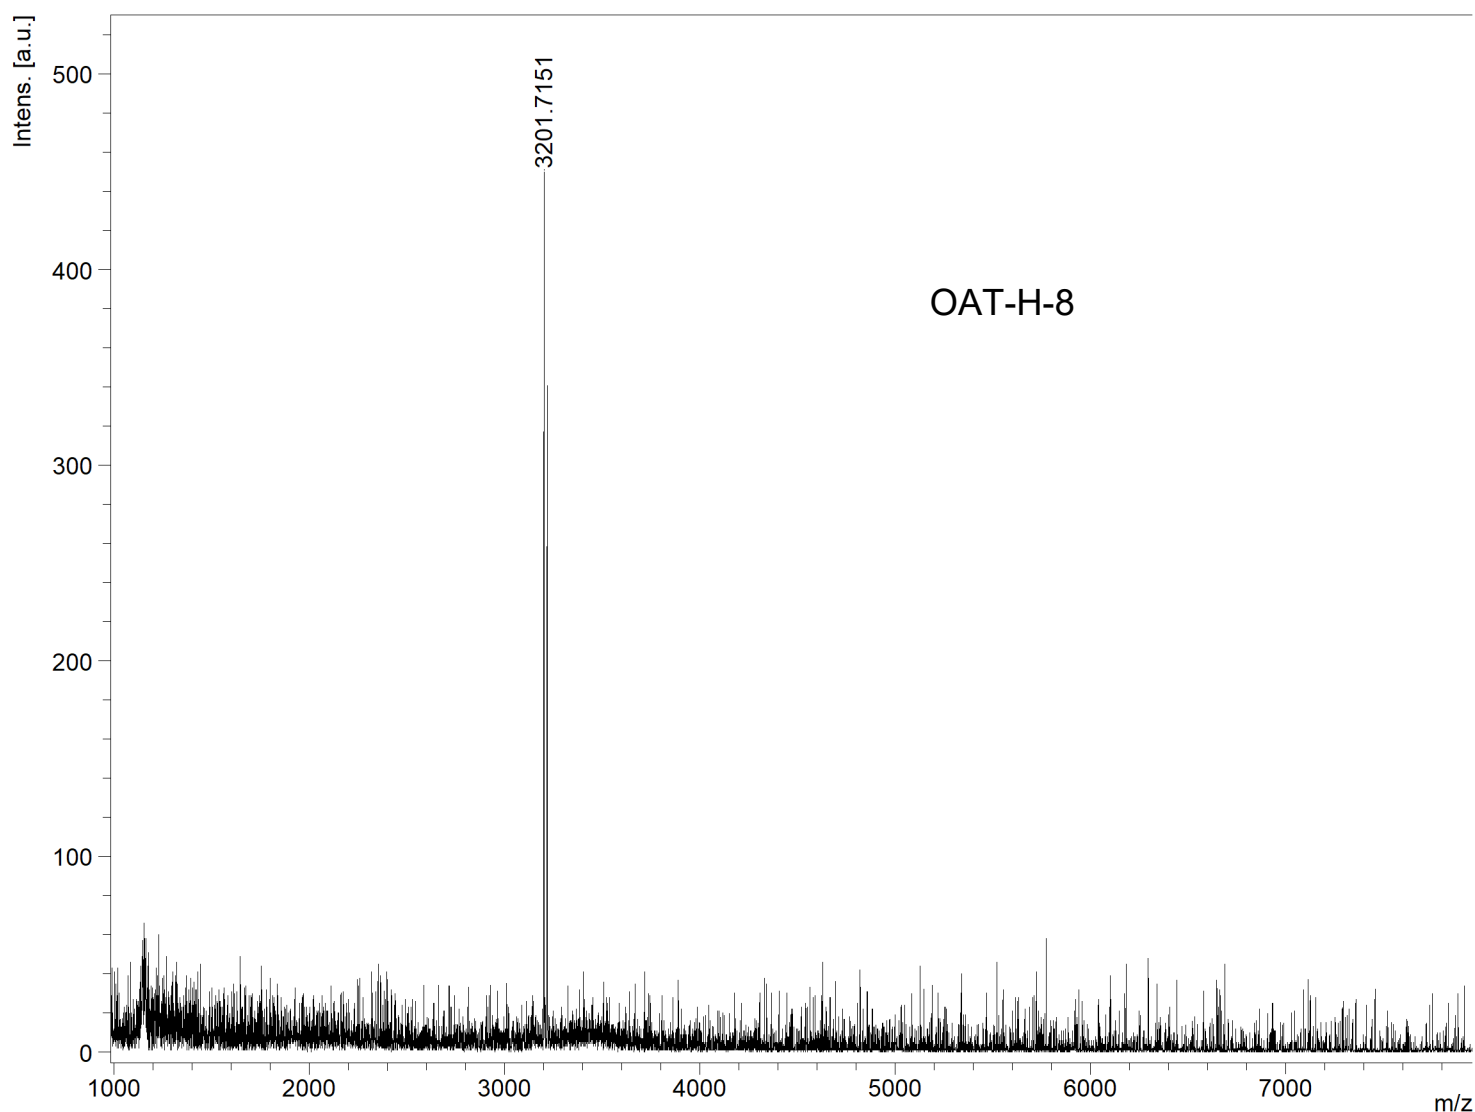

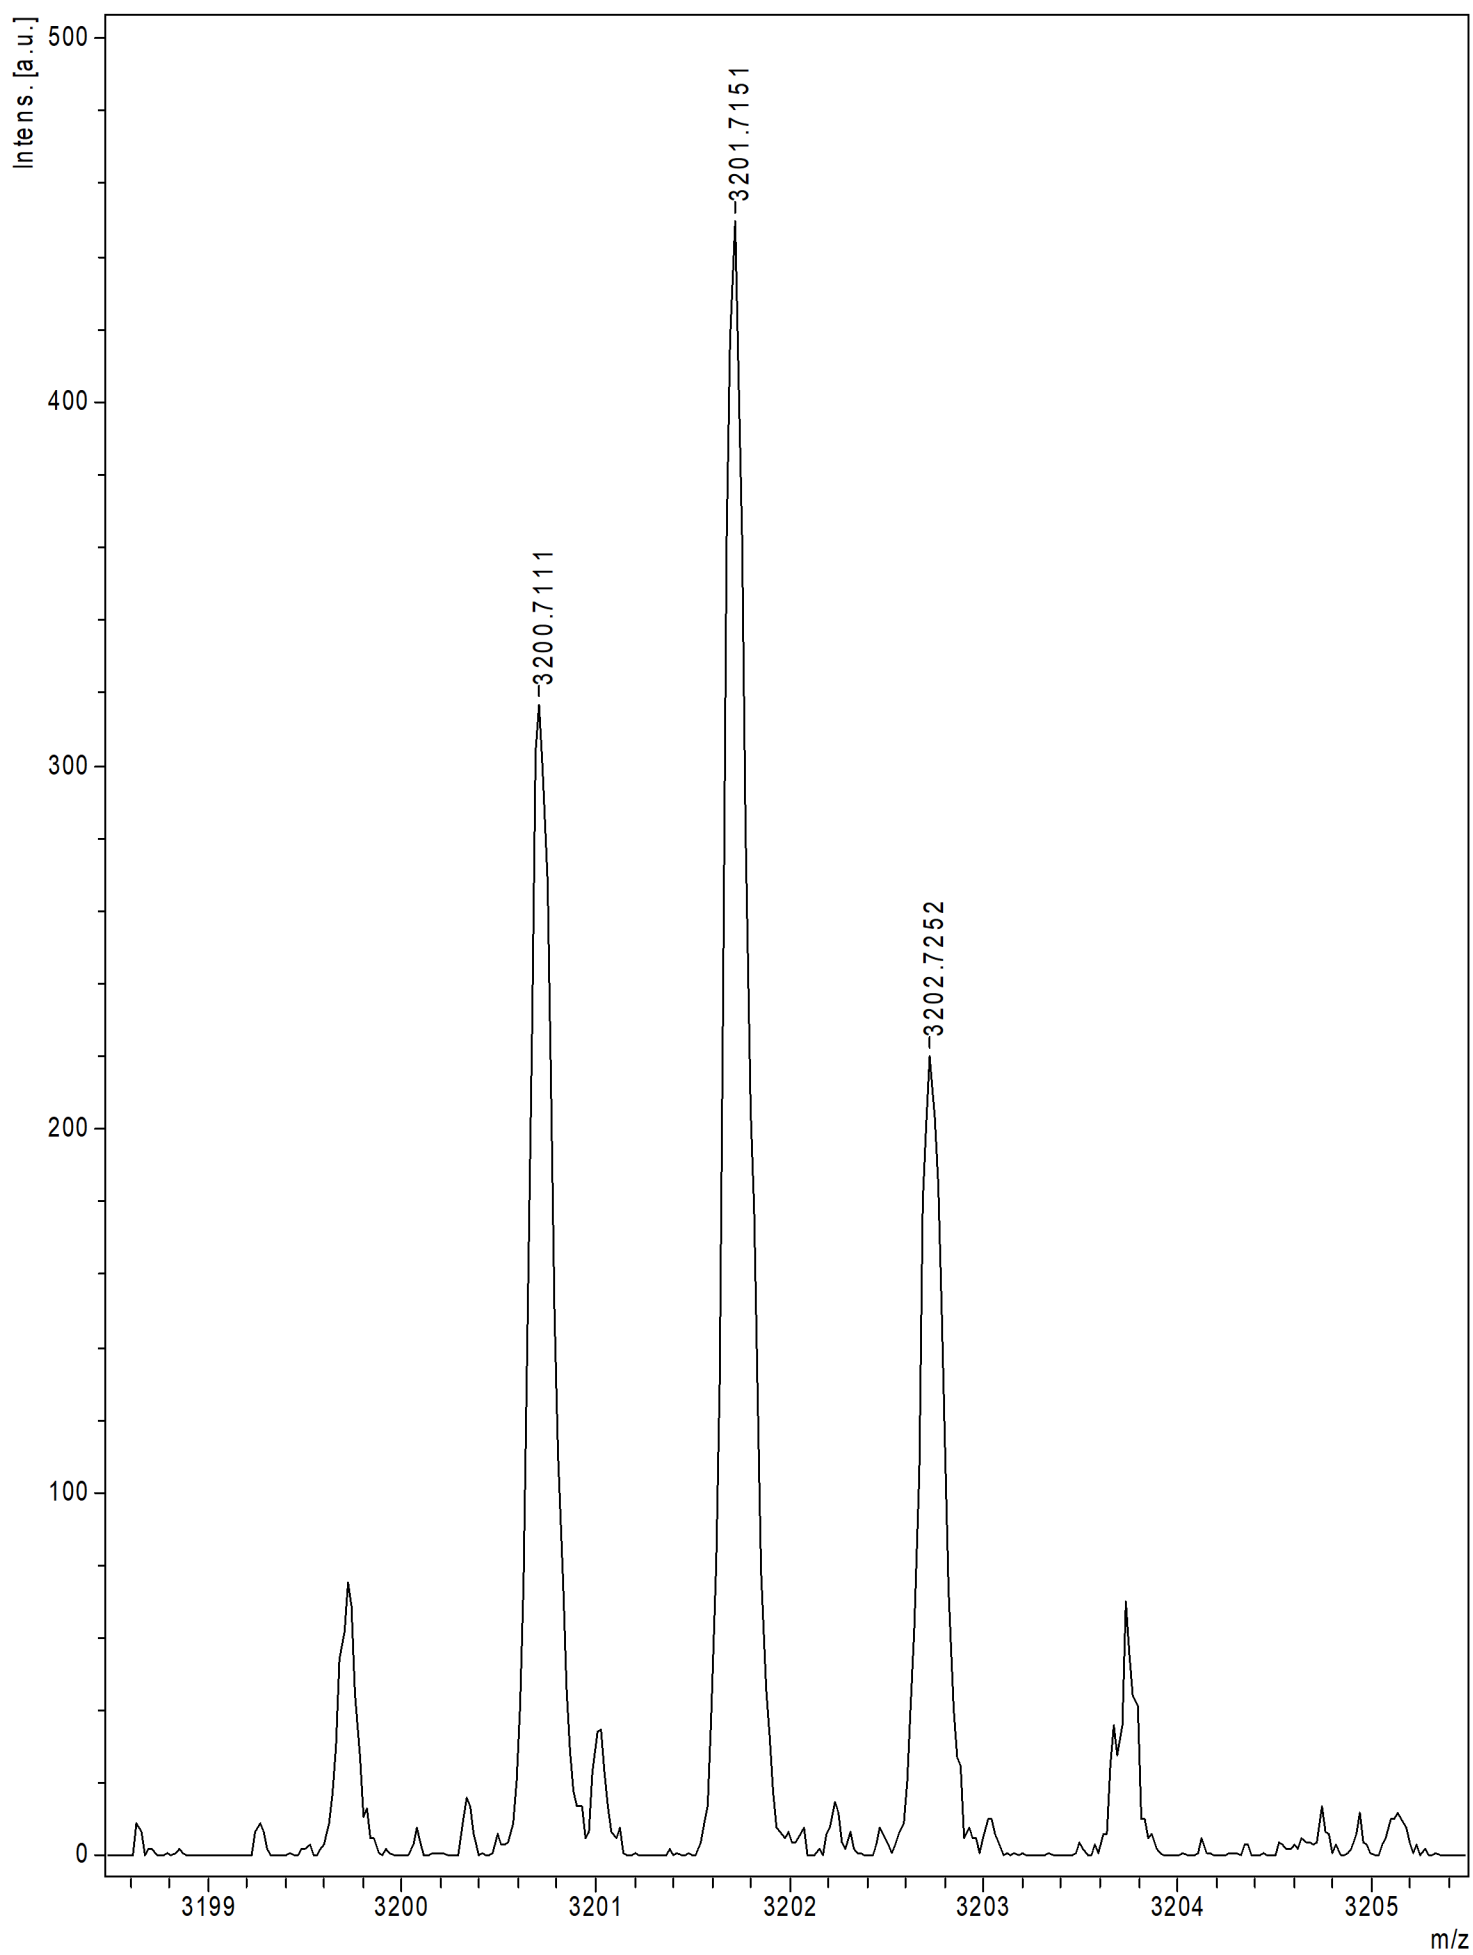

# Bruker Autoflex speed MALDI-TOF MS Analysis Report

Department of Chemistry, The Chinese University of Hong Kong

## Analysis Info

Sample Name: OAT10-a Reference No.: wfhfc067\0\_B3\4  
Applicant Name: Zheng Kun Date of Analysis : 2018-02-13T15:41:18.000  
Method: D:\Methods\flexControlMethods\Test\_RP\_1000-4500\_Da.par  
Polarity: POS PIE delay: 150 ns No. of shots: 2000  
Comment: Reflector mode, DCTB as matrix, 384 polished stainless steel target plate

## Accurate Mass Measurement

Molecular formula: C<sub>24</sub>H<sub>41</sub>N<sub>2</sub>O<sub>12</sub>  
Abundant Isotopic (theoretical) [M+Na]<sup>+</sup>: 3879.2745  
Experimental [M+Na]<sup>+</sup>: 3879.2670  
Error (ppm): 1.93

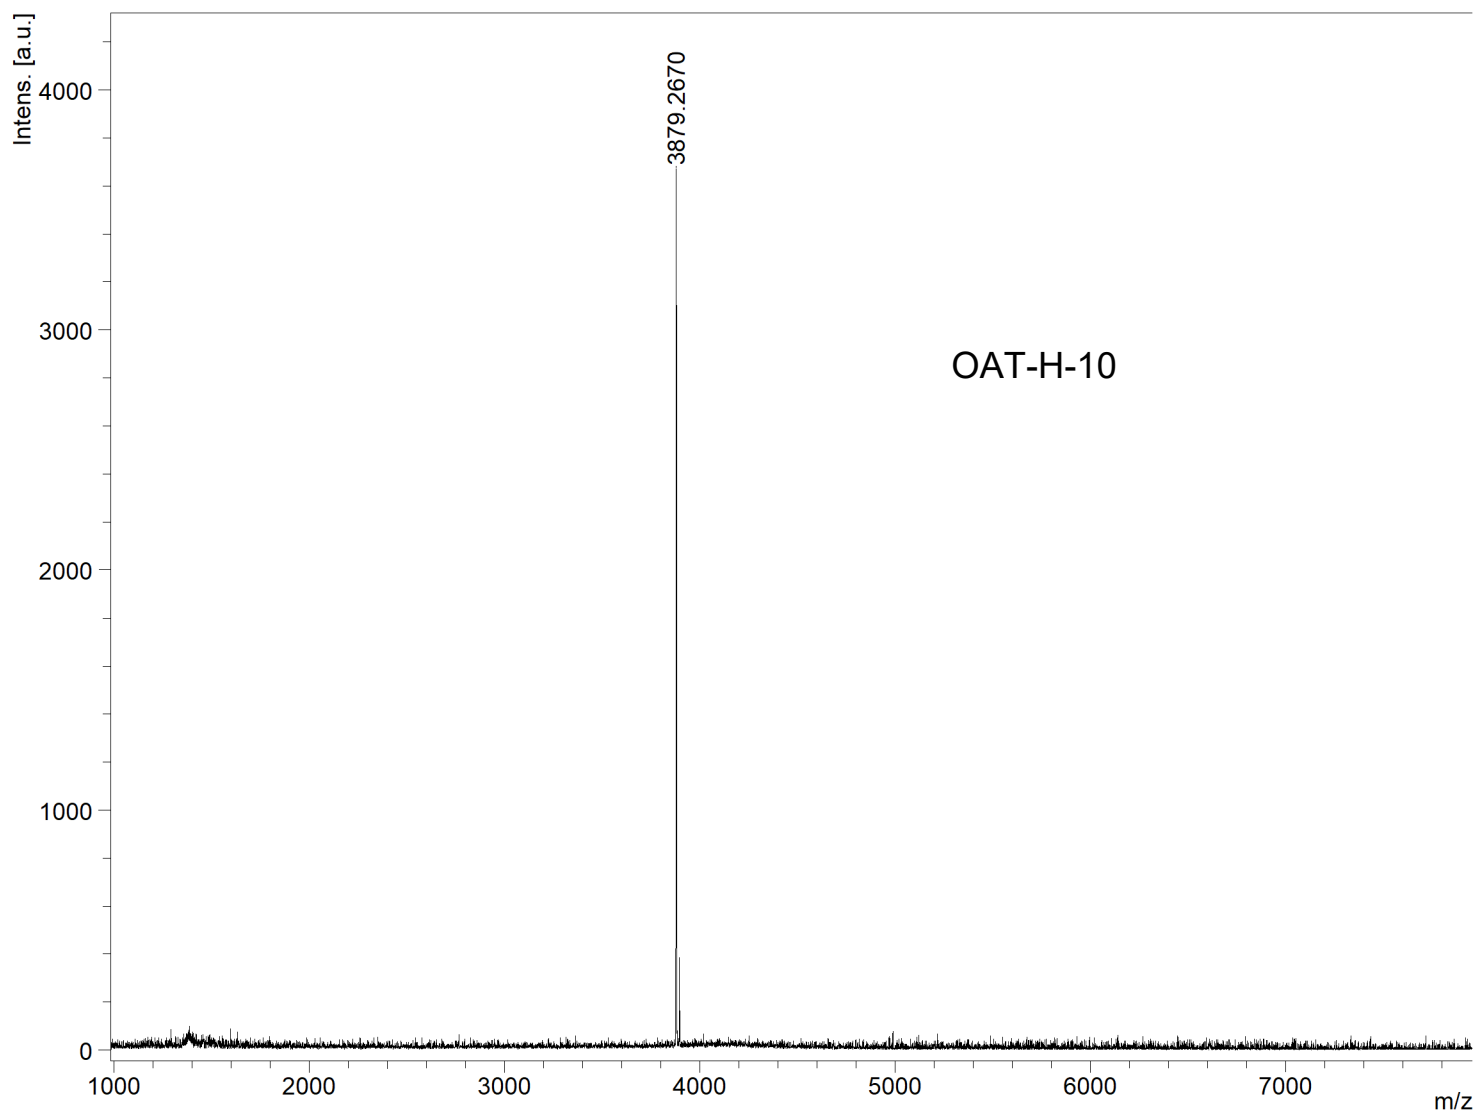

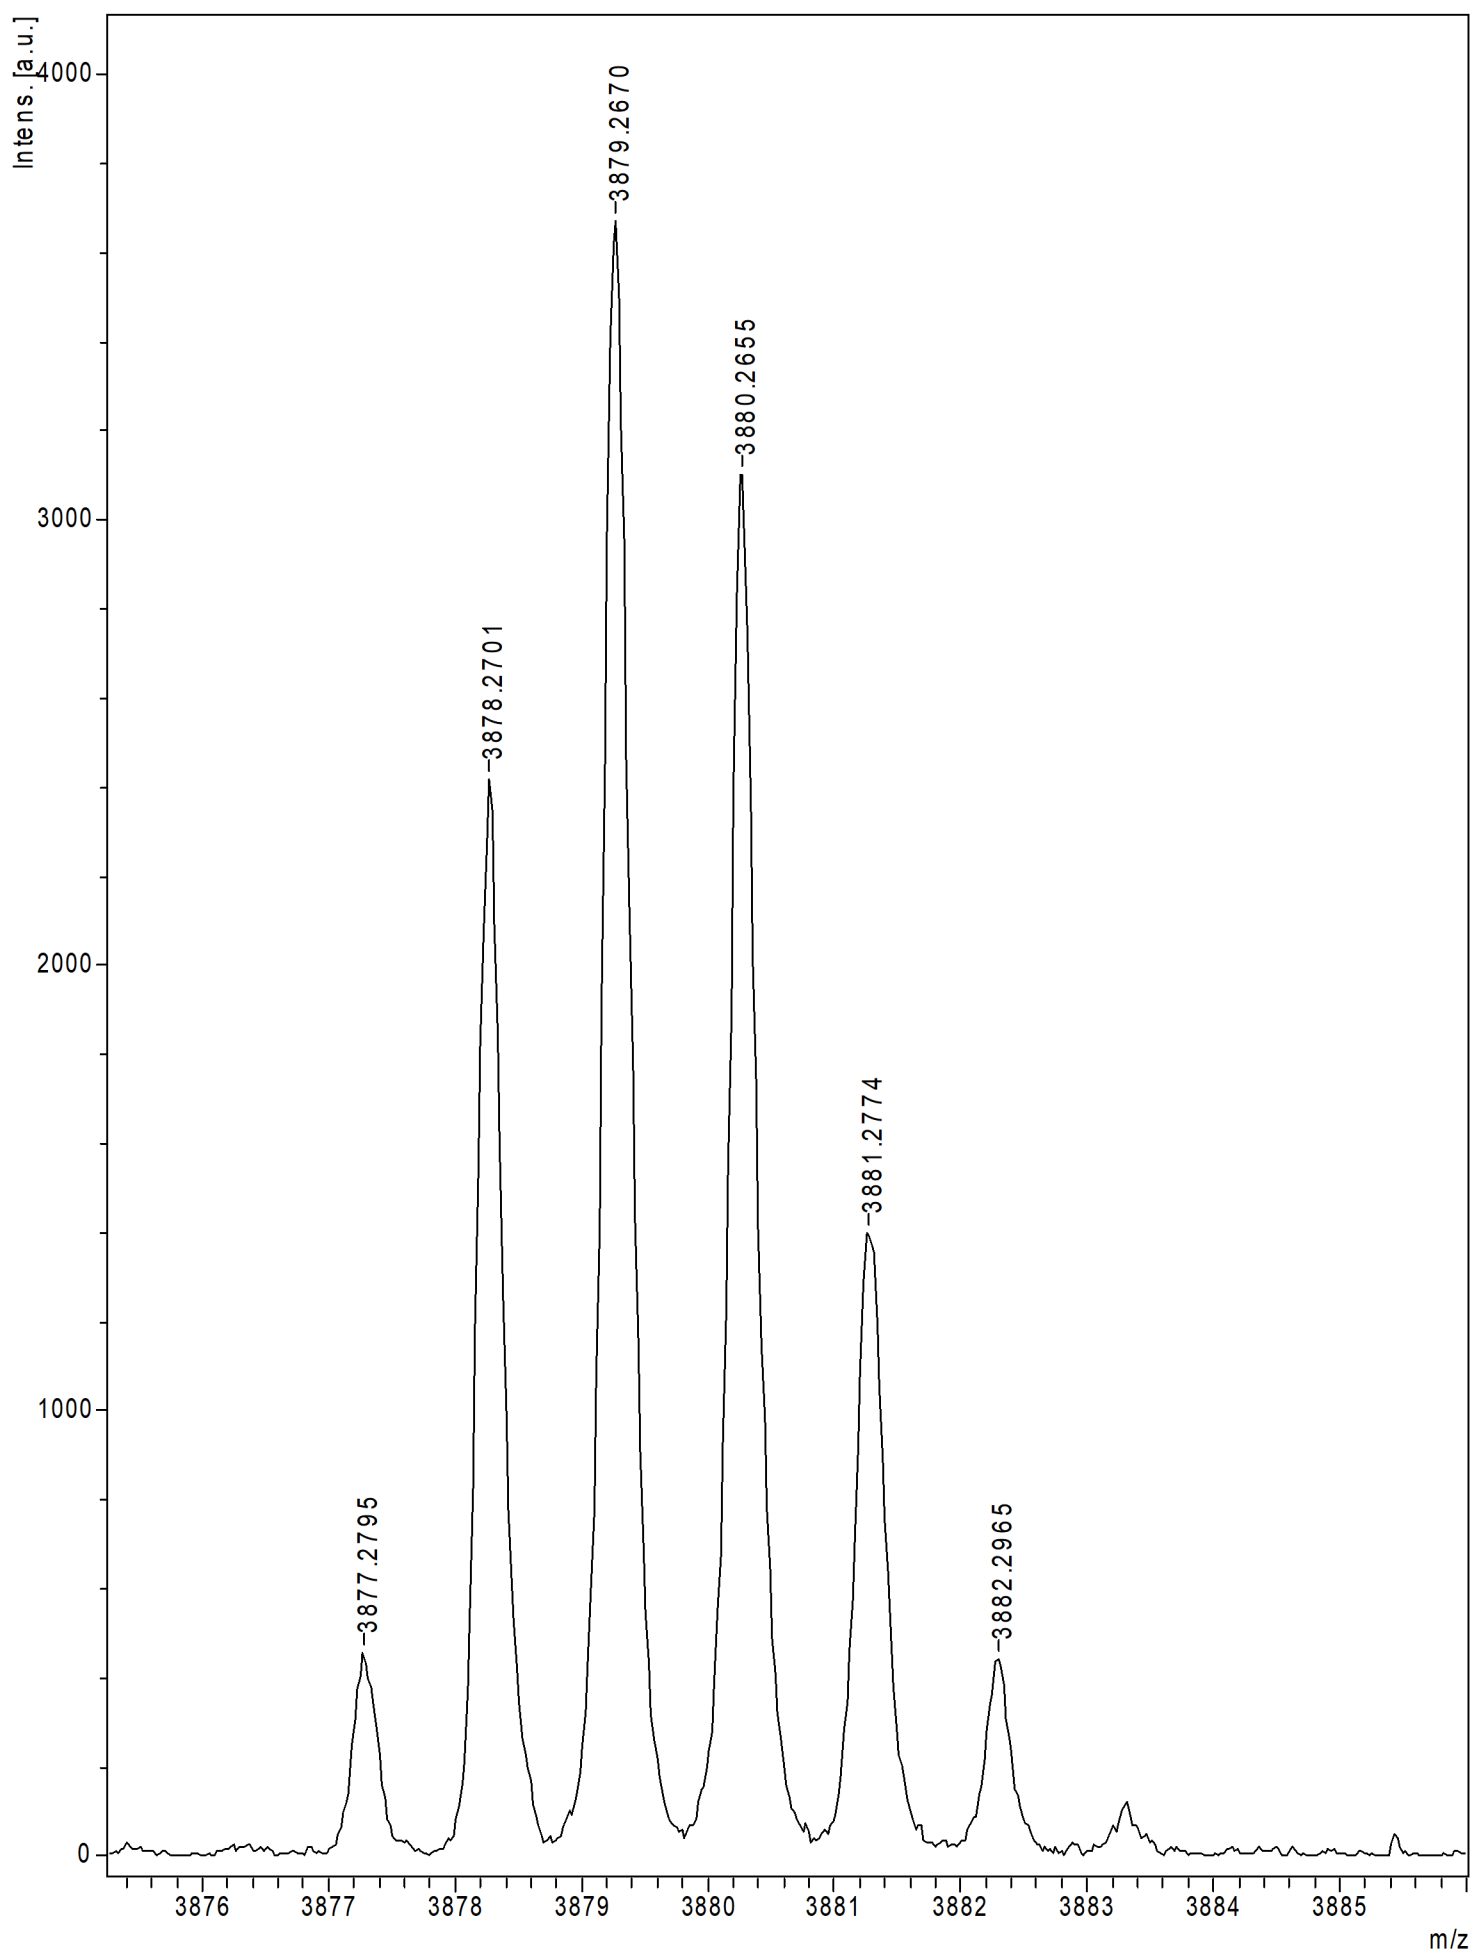

# Thermo QEFMS Analysis Report

## Analysis Info

|               |                                        |                |          |
|---------------|----------------------------------------|----------------|----------|
| Sample Name : | Zk-OATe-2                              | Reference No.: | Qhfc042  |
| Instrument :  | Q Exactive Focus Orbitrap              |                |          |
| Source :      | HESI II                                | Polarity :     | Positive |
| Comment :     | ESI pos, 3.2kV, by LC, with sheath gas |                |          |

## Accurate Mass Measurement

|                                         |                                                                |
|-----------------------------------------|----------------------------------------------------------------|
| Molecular formula :                     | C <sub>76</sub> H <sub>137</sub> N <sub>5</sub> O <sub>6</sub> |
| Experimental Mass [M+Na] <sup>+</sup> : | 1239.04458                                                     |
| Theoretical Mass [M+Na] <sup>+</sup> :  | 1239.04611                                                     |
| Error (ppm) :                           | 1.2                                                            |

D:\Raw data\qhfc042

07/03/17 14:44:29

zk-OATe-2

qhfc042 #132 RT: 0.59 AV: 1 SB: 211 0.08-0.26, 0.67-1.43 NL: 1.06E  
T: FTMS + p ESI Full ms [200.0000-3000.0000]

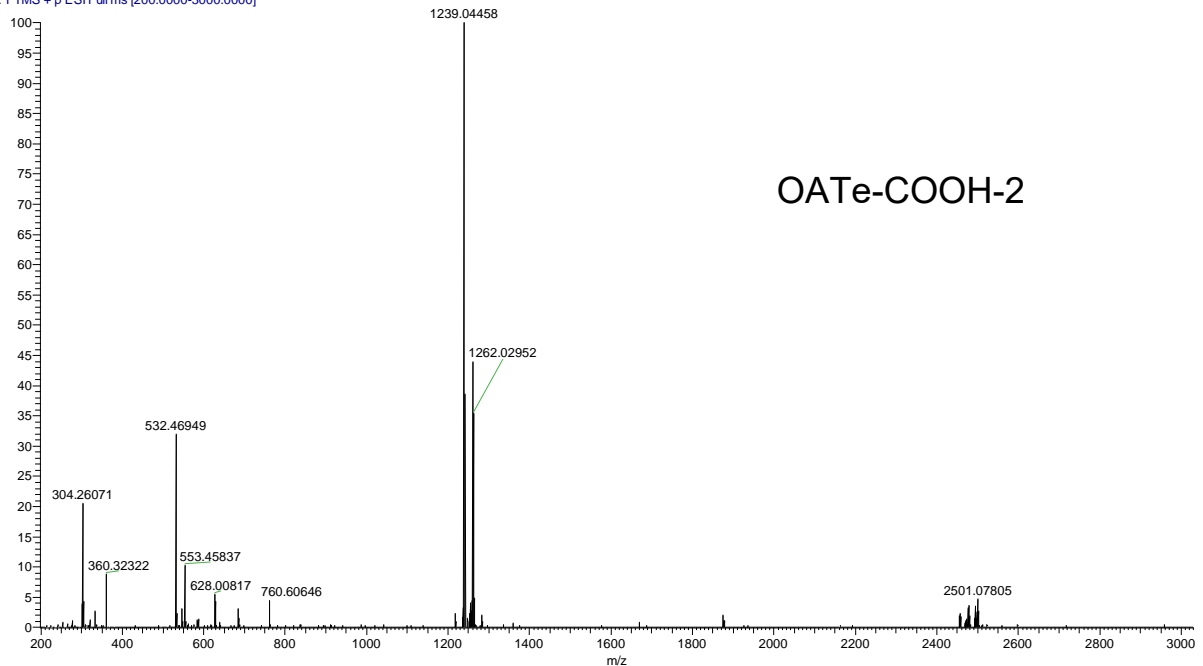

qhfc042 #132 RT: 0.59 AV: 1 SB: 211 0.08-0.26, 0.67-1.43 NL: 1.06E7  
T: FTMS + p ESI Full ms [200.0000-3000.0000]

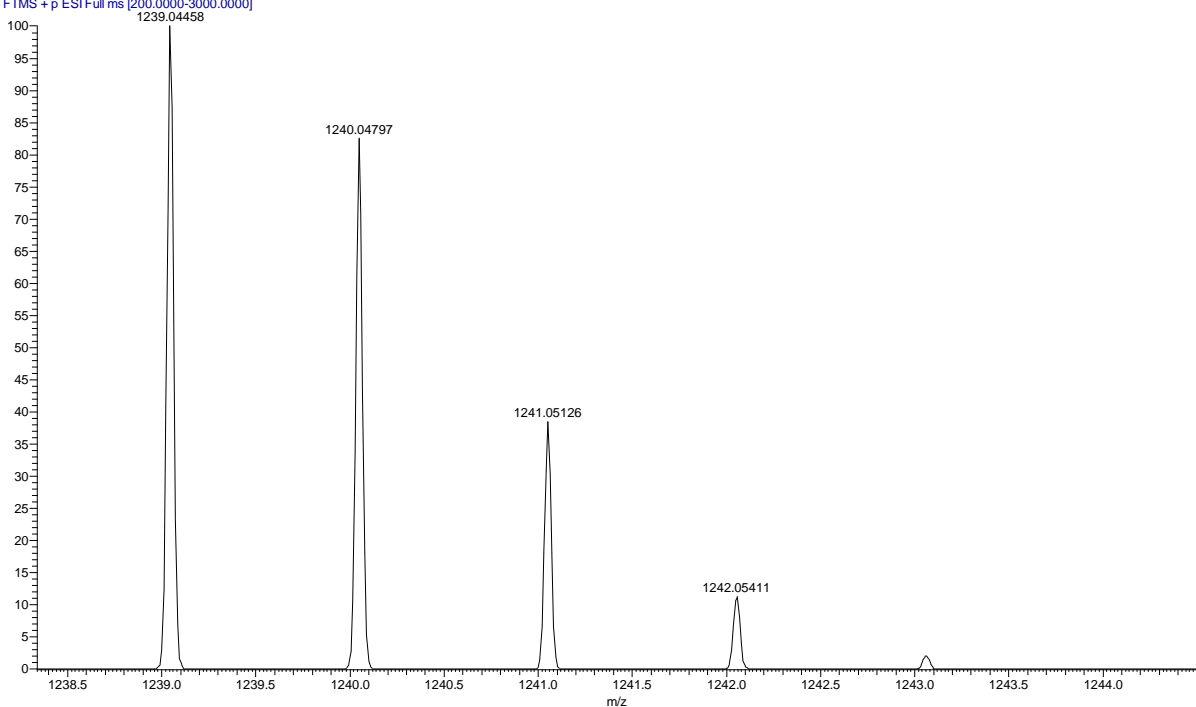

# Thermo QEFMS Analysis Report

## Analysis Info

|               |                                        |                |          |
|---------------|----------------------------------------|----------------|----------|
| Sample Name : | Zk-OATe-3                              | Reference No.: | Qhfc043  |
| Instrument :  | Q Exactive Focus Orbitrap              |                |          |
| Source :      | HESI II                                | Polarity :     | Positive |
| Comment :     | ESI pos, 3.2kV, by LC, with sheath gas |                |          |

## Accurate Mass Measurement

|                                         |                                                                |
|-----------------------------------------|----------------------------------------------------------------|
| Molecular formula :                     | C <sub>79</sub> H <sub>140</sub> N <sub>6</sub> O <sub>5</sub> |
| Experimental Mass [M+Na] <sup>+</sup> : | 1276.07527                                                     |
| Theoretical Mass [M+Na] <sup>+</sup> :  | 1276.07774                                                     |
| Error (ppm) :                           | 1.9                                                            |

D:\Raw data\qhfc043

07/03/17 14:56:47

zk-OATe-3

qhfc043 #225 RT: 1.02 AV: 1 SB: 276 0.65-0.89, 1.49-2.49 NL: 6.48E  
T: FTMS + p ESI Full ms [200.0000-3000.0000]

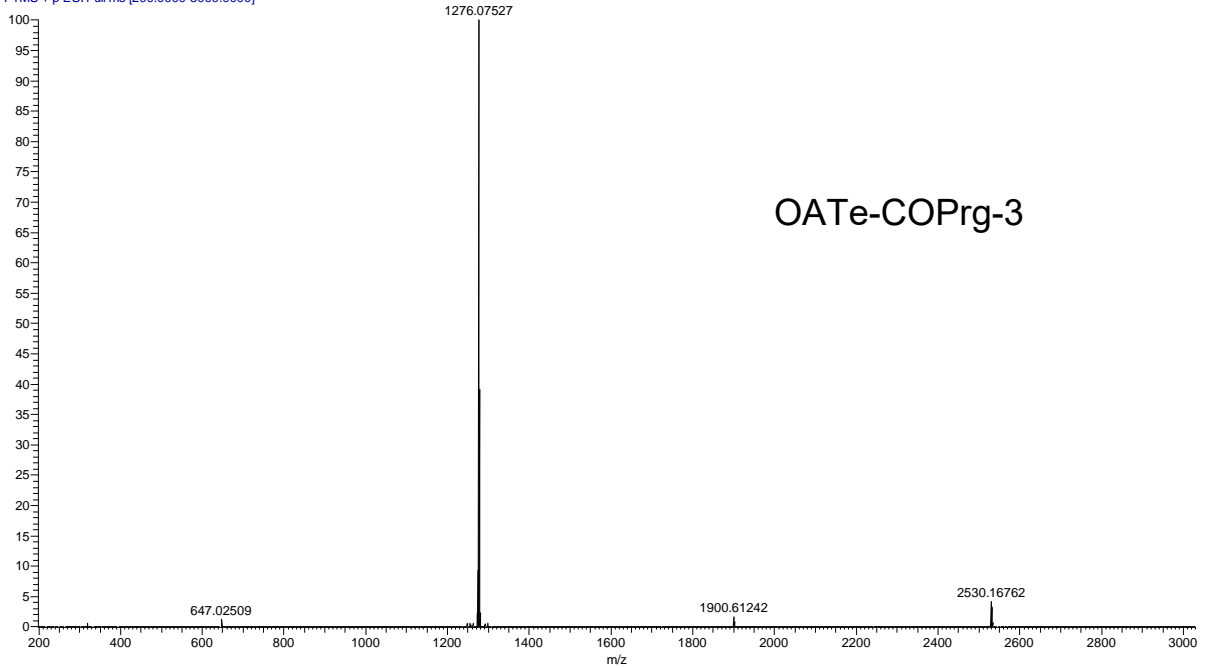

qhfc043 #224 RT: 1.02 AV: 1 SB: 276 0.65-0.89, 1.49-2.49 NL: 5.89E7  
T: FTMS + p ESI Full ms [200.0000-3000.0000]

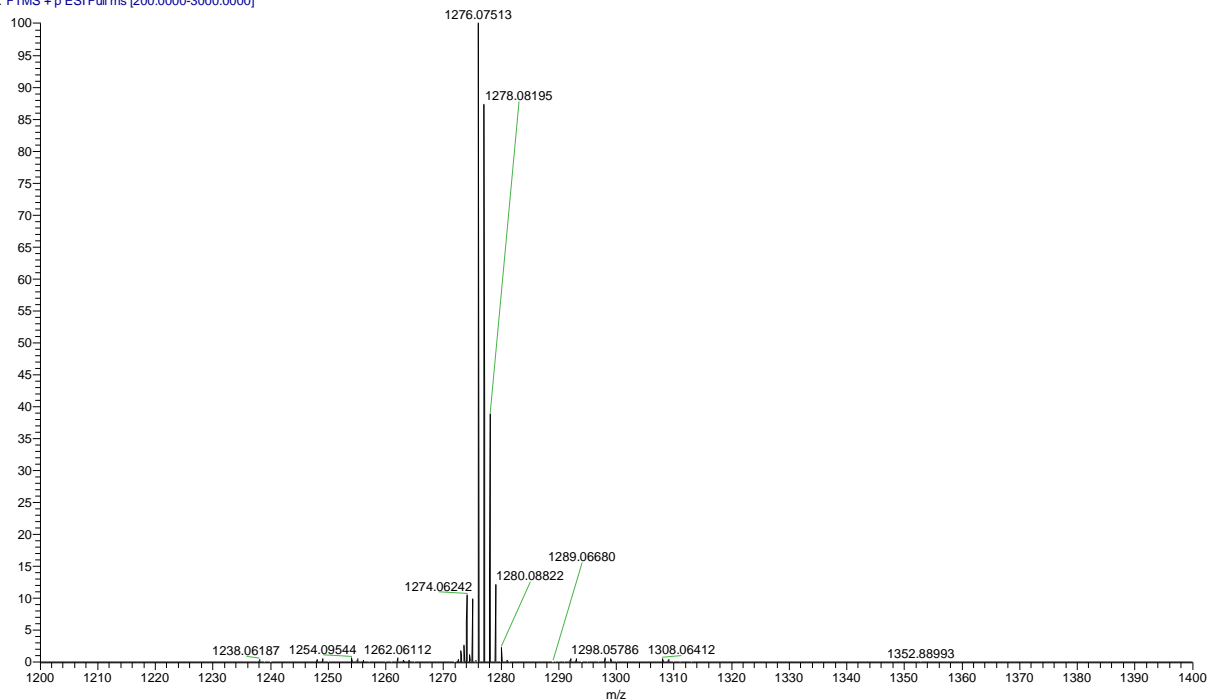

# Thermo QEFMS Analysis Report

## Analysis Info

|               |                                        |                |          |
|---------------|----------------------------------------|----------------|----------|
| Sample Name : | Zk-OATe4                               | Reference No.: | Qhfc190  |
| Instrument :  | Q Exactive Focus Orbitrap              |                |          |
| Source :      | HESI II                                | Polarity :     | Positive |
| Comment :     | ESI pos, 3.2kV, by LC, with sheath gas |                |          |

## Accurate Mass Measurement

|                                         |                           |
|-----------------------------------------|---------------------------|
| Molecular formula :                     | $C_{120}H_{212}N_{10}O_8$ |
| Experimental Mass [M+Na] <sup>+</sup> : | 1945.64348                |
| Theoretical Mass [M+Na] <sup>+</sup> :  | 1945.64142                |
| Error (ppm) :                           | 1.0                       |

D:\Raw data\qhfc190 11/21/17 17:08:00 zk-OATe4

qhfc190 #76 RT: 0.35 AV: 1 SB: 212 0.08-0.26 , 0.67-1.43 NL: 1.71E6  
T: FTMS + p ESI Full ms [300.0000-3000.0000]

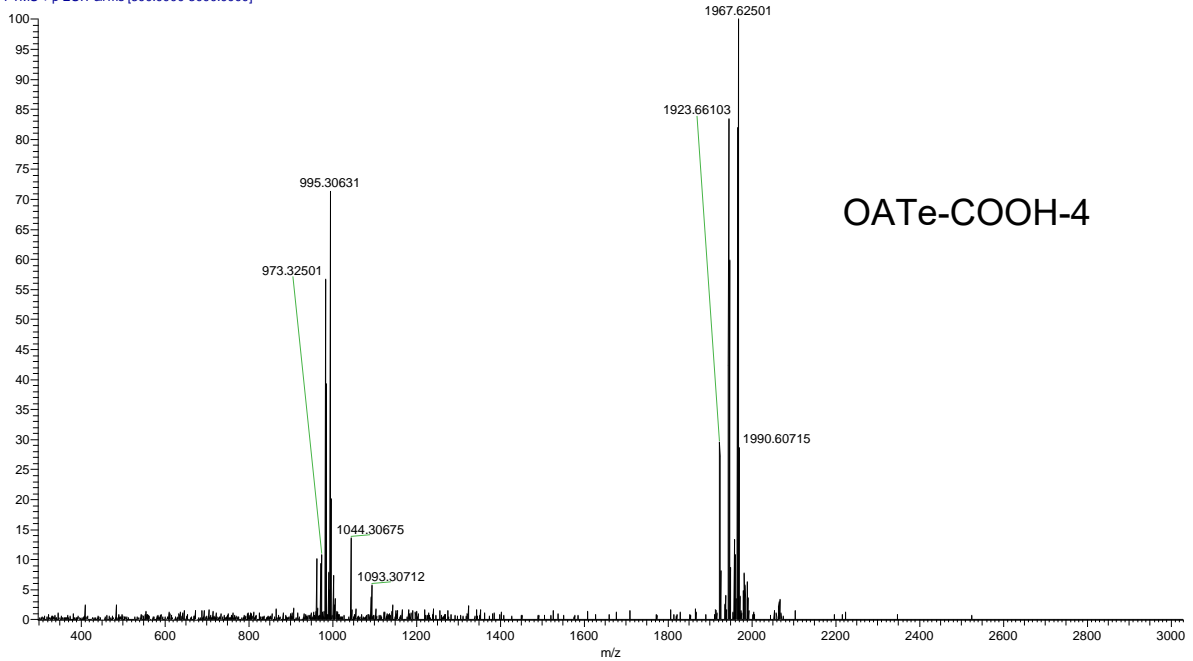

qhfc190 #76 RT: 0.35 AV: 1 SB: 212 0.08-0.26 , 0.67-1.43 NL: 1.43E6  
T: FTMS + p ESI Full ms [300.0000-3000.0000]

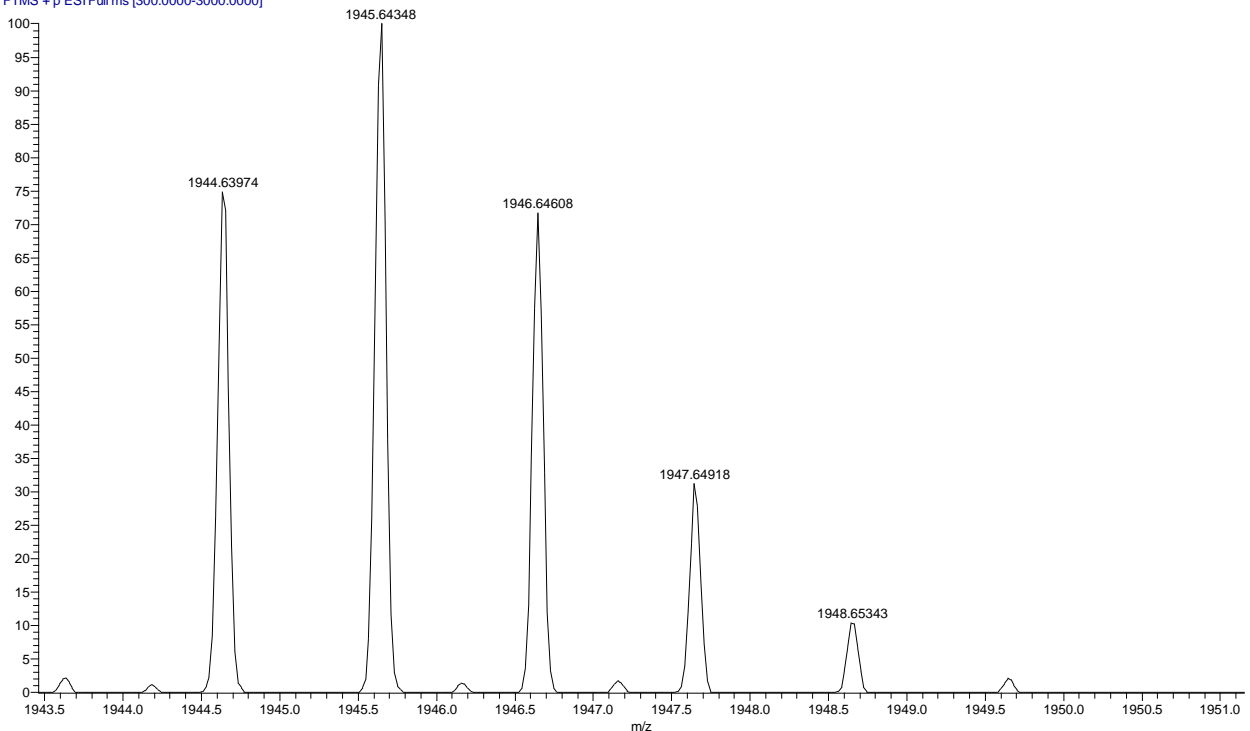

# Thermo QEFMS Analysis Report

## Analysis Info

|               |                                        |                |          |
|---------------|----------------------------------------|----------------|----------|
| Sample Name : | Zk-OATe5                               | Reference No.: | Qhfc191  |
| Instrument :  | Q Exactive Focus Orbitrap              |                |          |
| Source :      | HESI II                                | Polarity :     | Positive |
| Comment :     | ESI pos, 3.2kV, by LC, with sheath gas |                |          |

## Accurate Mass Measurement

|                                                 |                           |
|-------------------------------------------------|---------------------------|
| Molecular formula :                             | $C_{123}H_{215}N_{11}O_7$ |
| Experimental Mass $[M+Na]^+$ , $[M+2Na]^{2+}$ : | 1982.67308, 1002.83098    |
| Theoretical Mass $[M+Na]^+$ , $[M+2Na]^{2+}$ :  | 1982.67304, 1002.83113    |
| Error (ppm) :                                   | 0.0, 0.1                  |

D:\Raw data\qhfc191

11/21/17 17:19:14

zk-OATe5

qhfc191 #683-715 RT: 3.07-3.21 AV: 33 SB: 498 1.08-1.72 , 4.49-6.07  
T: FTMS + p ESI Full ms [300.0000-3000.0000]

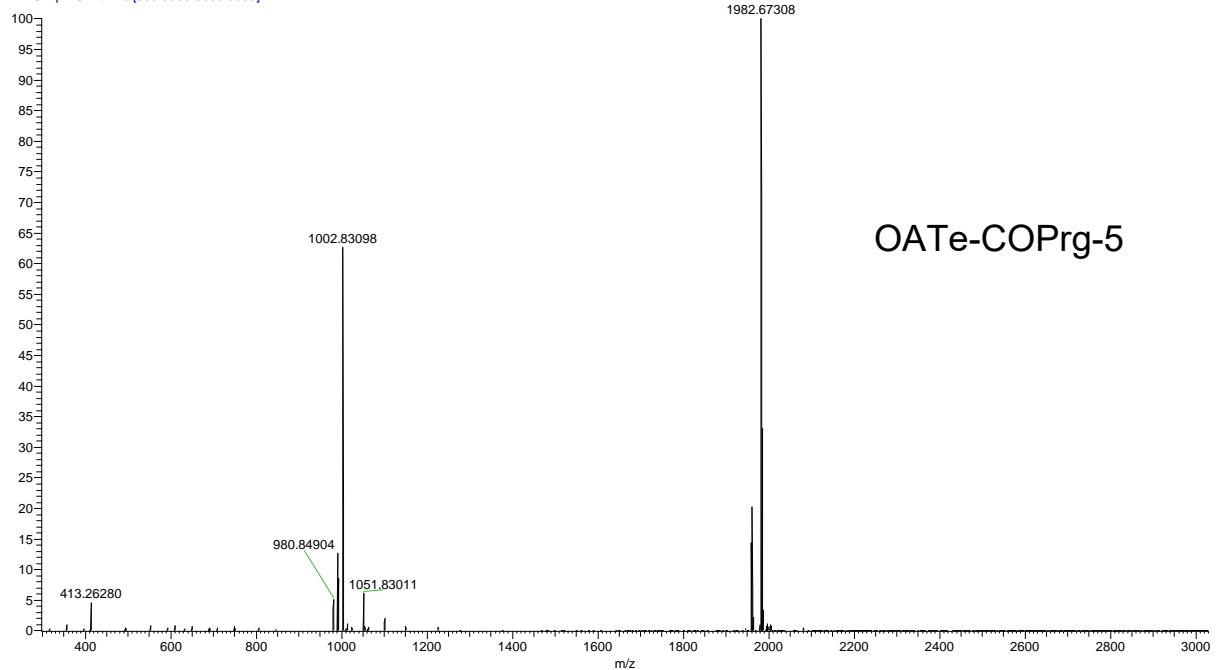

qhfc191 #684-715 RT: 3.07-3.21 AV: 32 SB: 498 1.08-1.72 , 4.49-6.07 NL: 8.23E6  
T: FTMS + p ESI Full ms [300.0000-3000.0000]

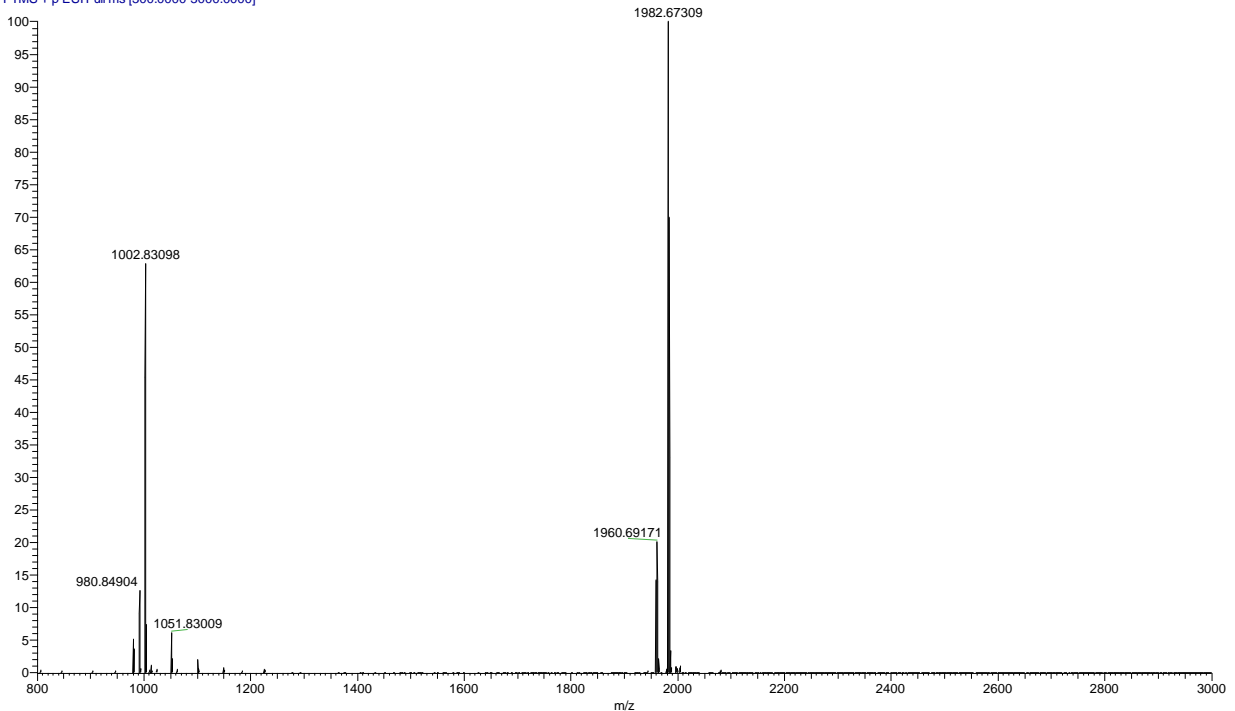



qhfc191 #684-715 RT: 3.07-3.21 AV: 32 SB: 498 1.08-1.72 , 4.49-6.07 NL: 8.23E6  
T: FTMS + p ESI Full ms [300.0000-3000.0000]

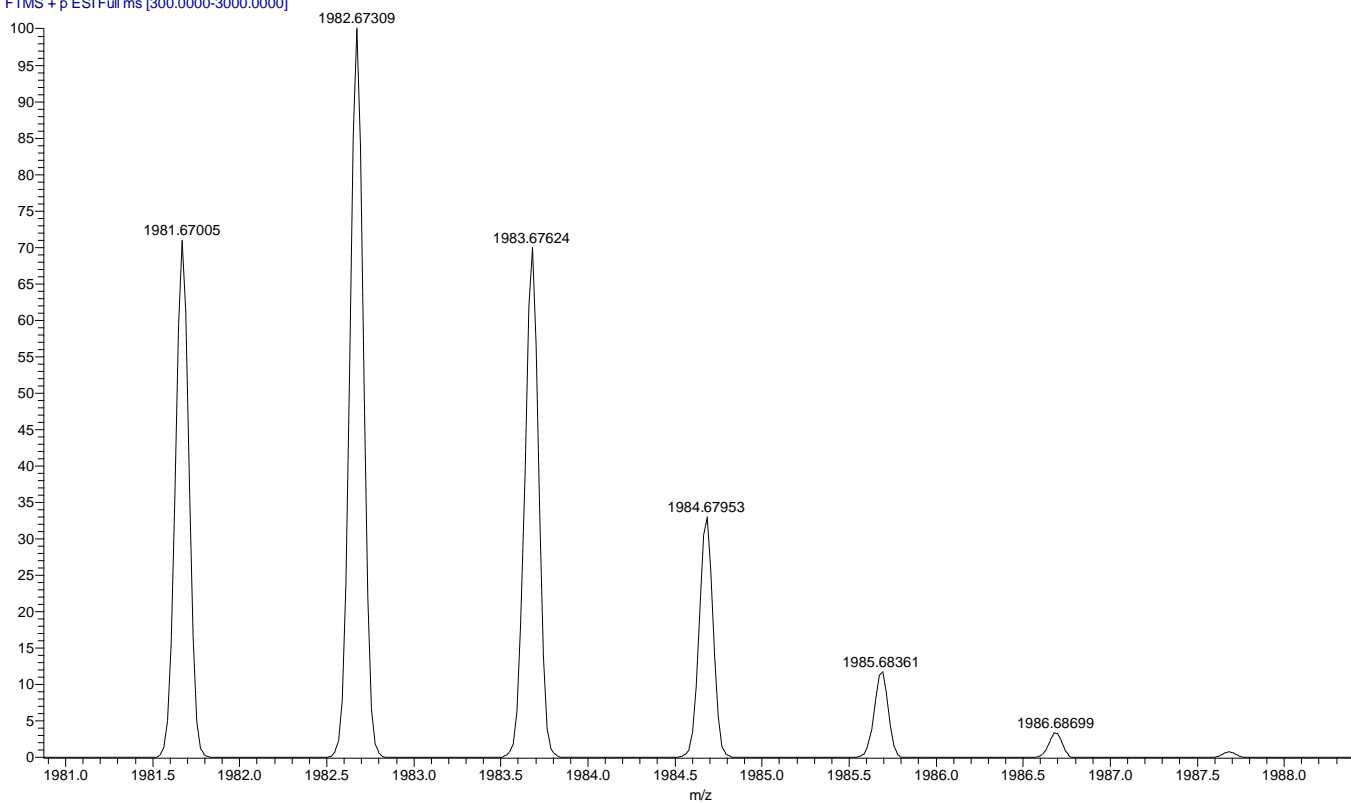

qhfc191 #684-715 RT: 3.07-3.21 AV: 32 SB: 498 1.08-1.72 , 4.49-6.07 NL: 5.18E6  
T: FTMS + p ESI Full ms [300.0000-3000.0000]

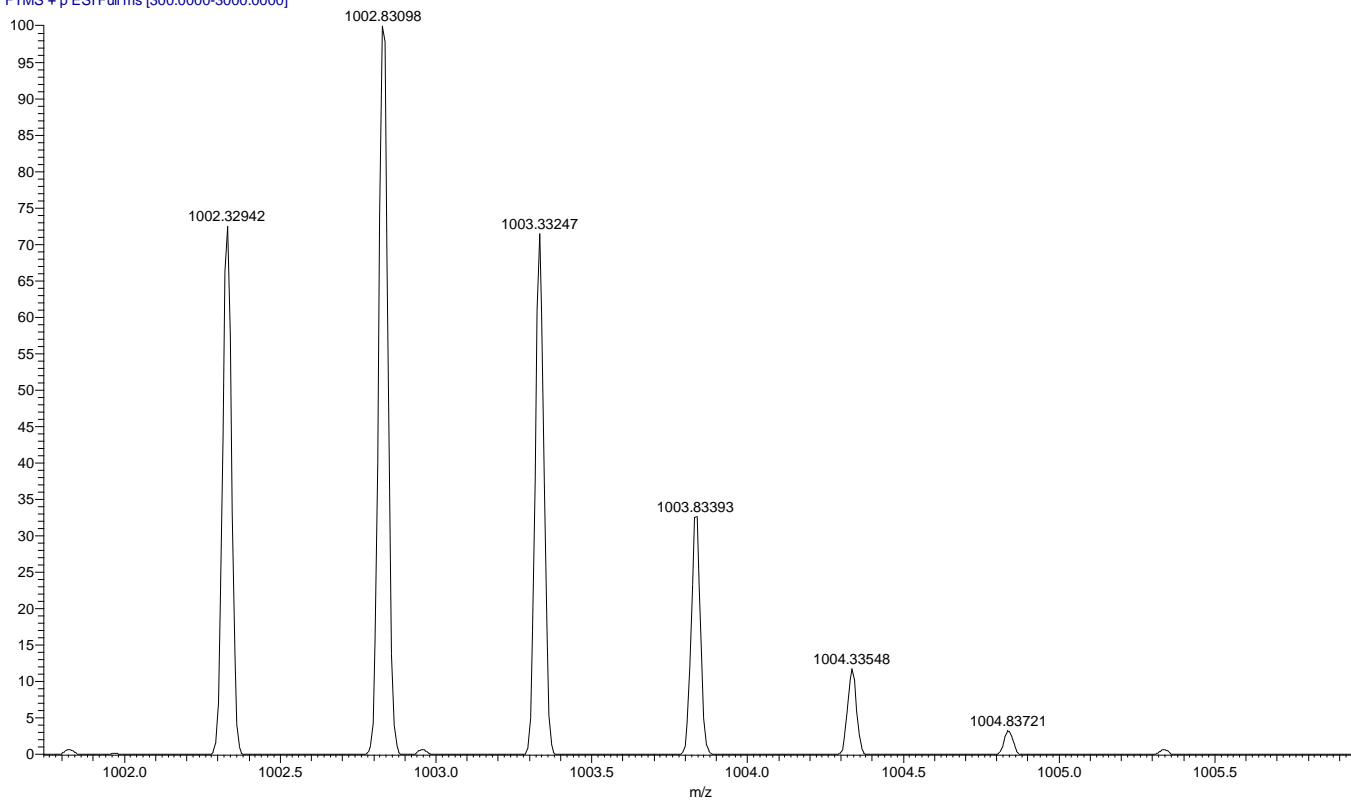

# Thermo QEFMS Analysis Report

## Analysis Info

|               |                                        |                |          |
|---------------|----------------------------------------|----------------|----------|
| Sample Name : | Zk-OATe6                               | Reference No.: | Wqhfc248 |
| Instrument :  | Q Exactive Focus Orbitrap              |                |          |
| Source :      | HESI II                                | Polarity :     | Positive |
| Comment :     | ESI pos, 3.2kV, by LC, with sheath gas |                |          |

## Accurate Mass Measurement

|                                                                 |                                                                   |
|-----------------------------------------------------------------|-------------------------------------------------------------------|
| Molecular formula :                                             | C <sub>164</sub> H <sub>287</sub> N <sub>15</sub> O <sub>10</sub> |
| Experimental Mass [M+Na] <sup>+</sup> , [M+2Na] <sup>2+</sup> : | 2651.23414, 1326.12014                                            |
| Theoretical Mass [M+Na] <sup>+</sup> , [M+2Na] <sup>2+</sup> :  | 2651.23348, 1326.12038                                            |
| Error (ppm) :                                                   | 0.2, 0.1                                                          |

D:\Raw data\wqhfc248 01/16/18 19:45:40 zk-OATe6

wqhfc248 #350-422 RT: 1.58-1.90 AV: 73 SB: 634 0.32-1.16, 2.30-4.3  
T: FTMS + p ESI Full ms [200.0000-3000.0000]

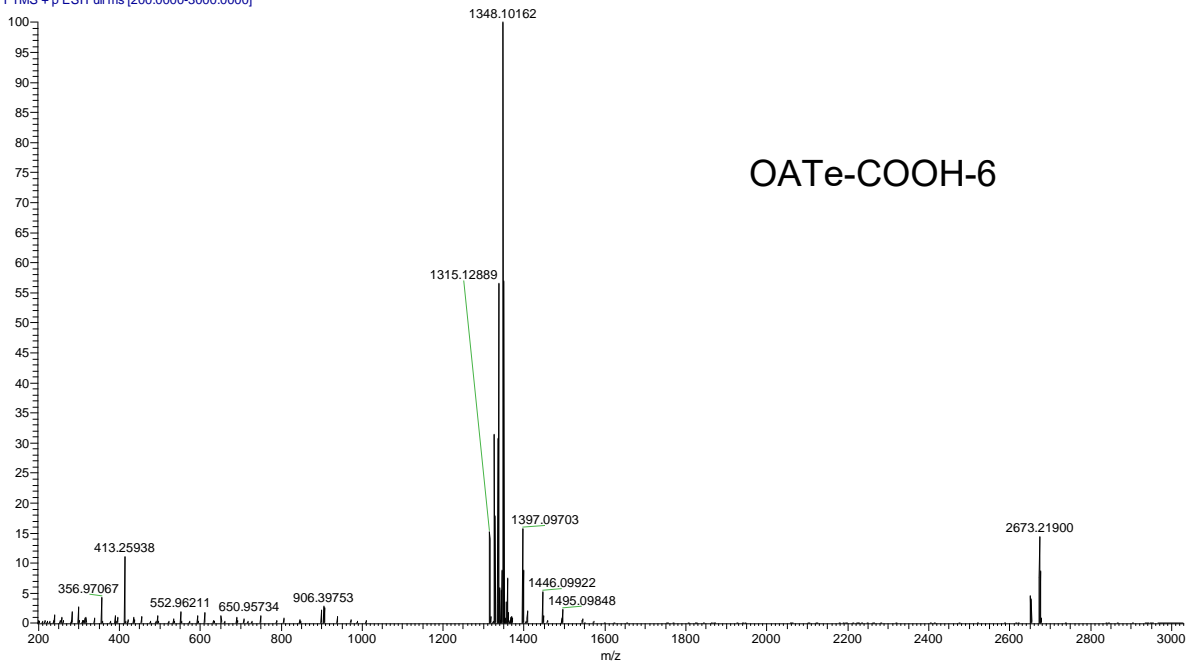

wqhfc248 #350-422 RT: 1.58-1.90 AV: 73 SB: 634 0.32-1.16, 2.30-4.31 NL: 1.13E5  
T: FTMS + p ESI Full ms [200.0000-3000.0000]

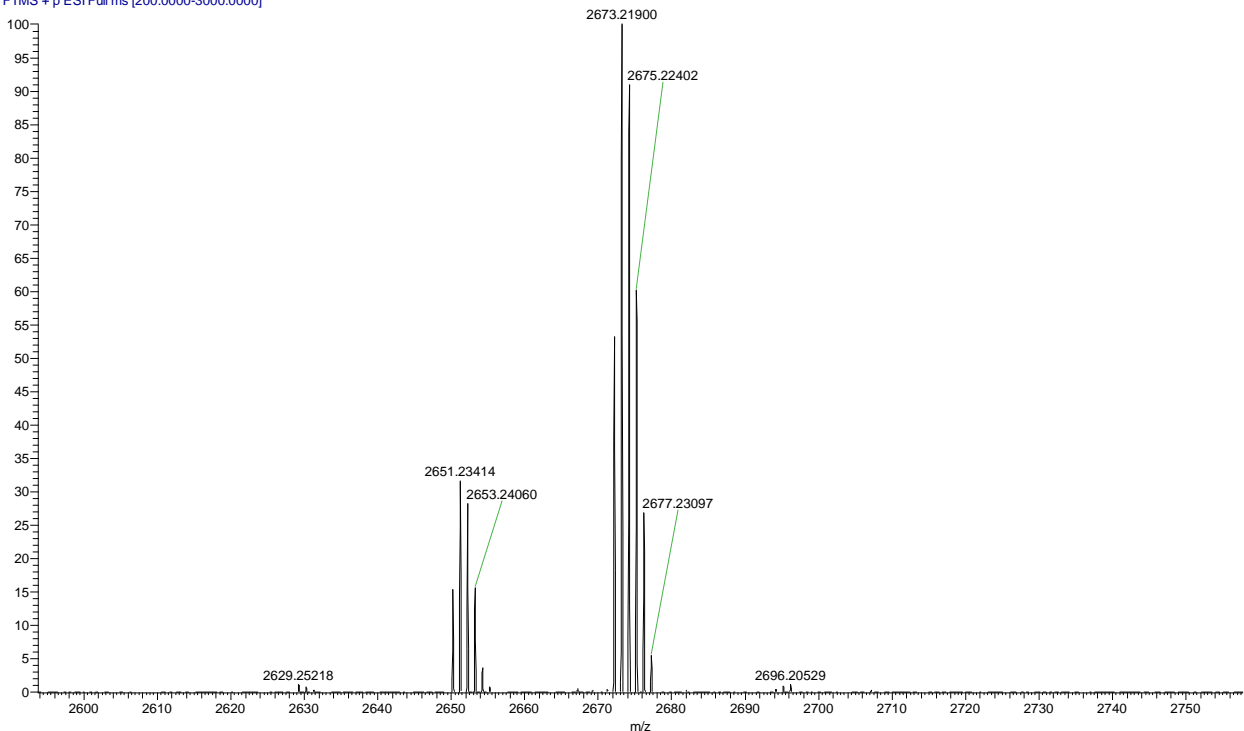

wqhtc248 #350-422 RT: 1.58-1.90 AV: 73 SB: 634 0.32-1.16, 2.30-4.31 NL: 3.55E4  
T: FTMS + p ESI Full ms [200.0000-3000.0000]

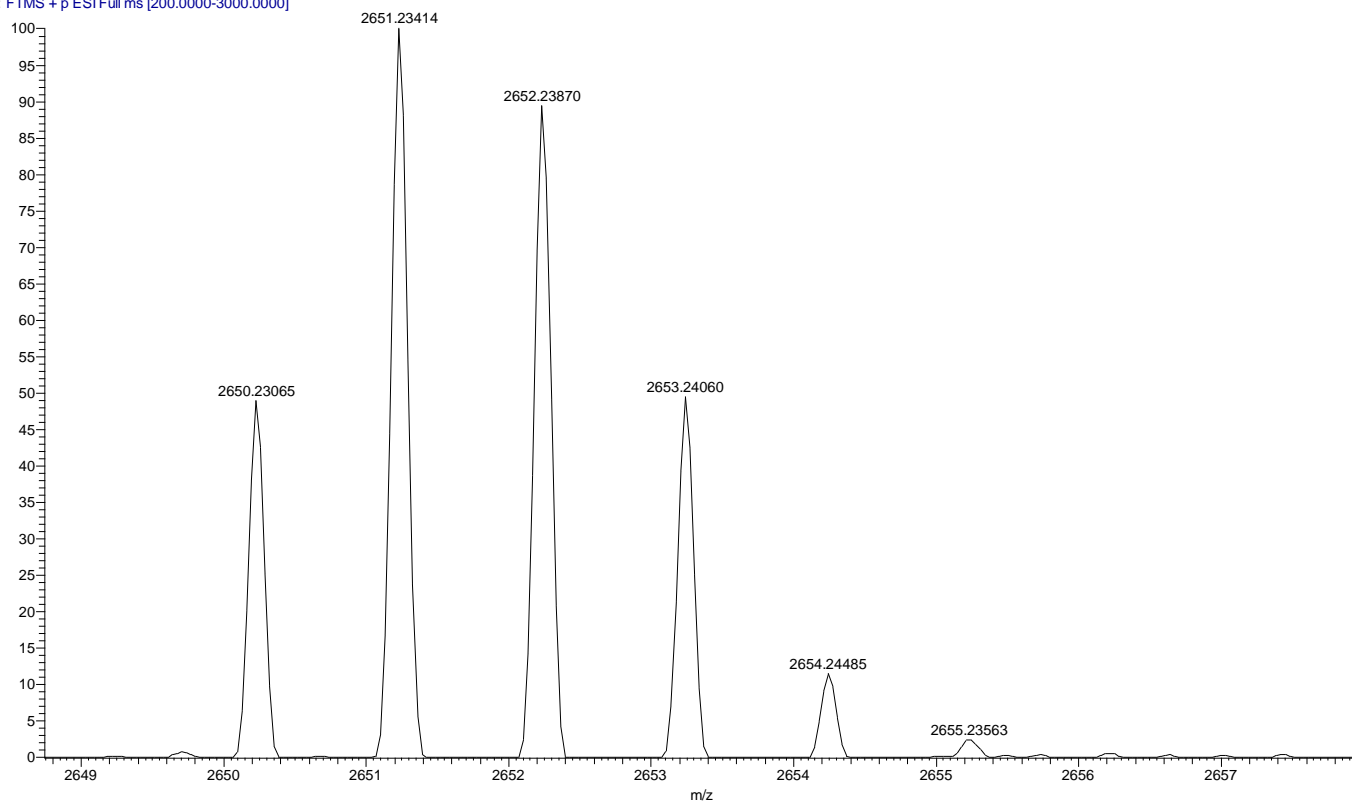

wqhtc248 #350-422 RT: 1.58-1.90 AV: 73 SB: 634 0.32-1.16, 2.30-4.31 NL: 2.45E5  
T: FTMS + p ESI Full ms [200.0000-3000.0000]

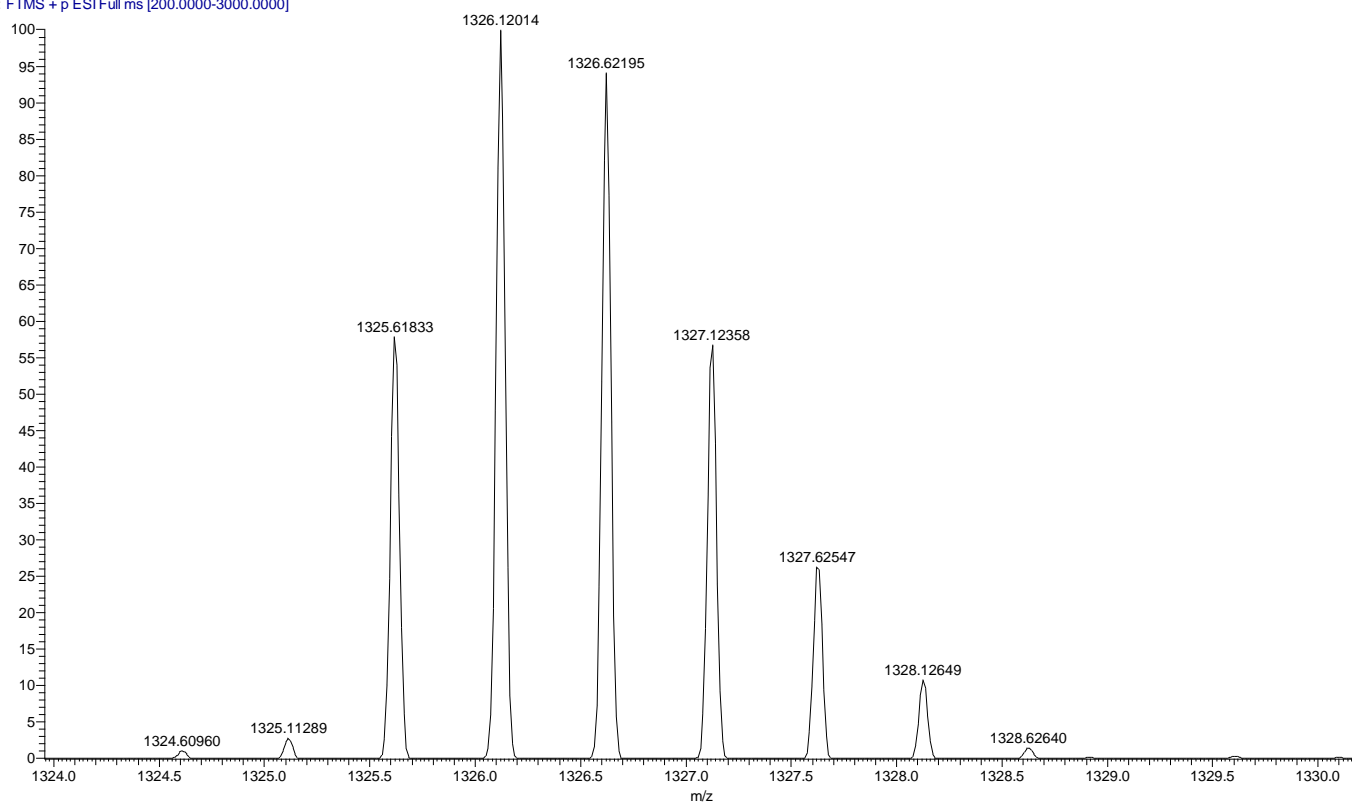

# Bruker Autoflex speed MALDI-TOF MS Analysis Report

Department of Chemistry, The Chinese University of Hong Kong

## Analysis Info

Sample Name: ZK-OATe7 Reference No.: wfhfc073\0\_C7\2  
Applicant Name: Zheng Kun Date of Analysis : 2018-04-25T15:01:56.000  
Method: D:\Methods\flexControlMethods\Test\_RP\_1000-4500\_Da.par  
Polarity: POS PIE delay: 150 ns No. of shots: 2400  
Comment: Reflector mode, DCTB as matrix, 384 polished stainless steel target plate

## Accurate Mass Measurement

Molecular formula: C<sub>16</sub>H<sub>29</sub>O<sub>9</sub>N  
Abundant Isotopic (theoretical) [M+Na]<sup>+</sup>: 2688.2651  
Experimental [M+Na]<sup>+</sup>: 2688.2665  
Error (ppm): 0.52

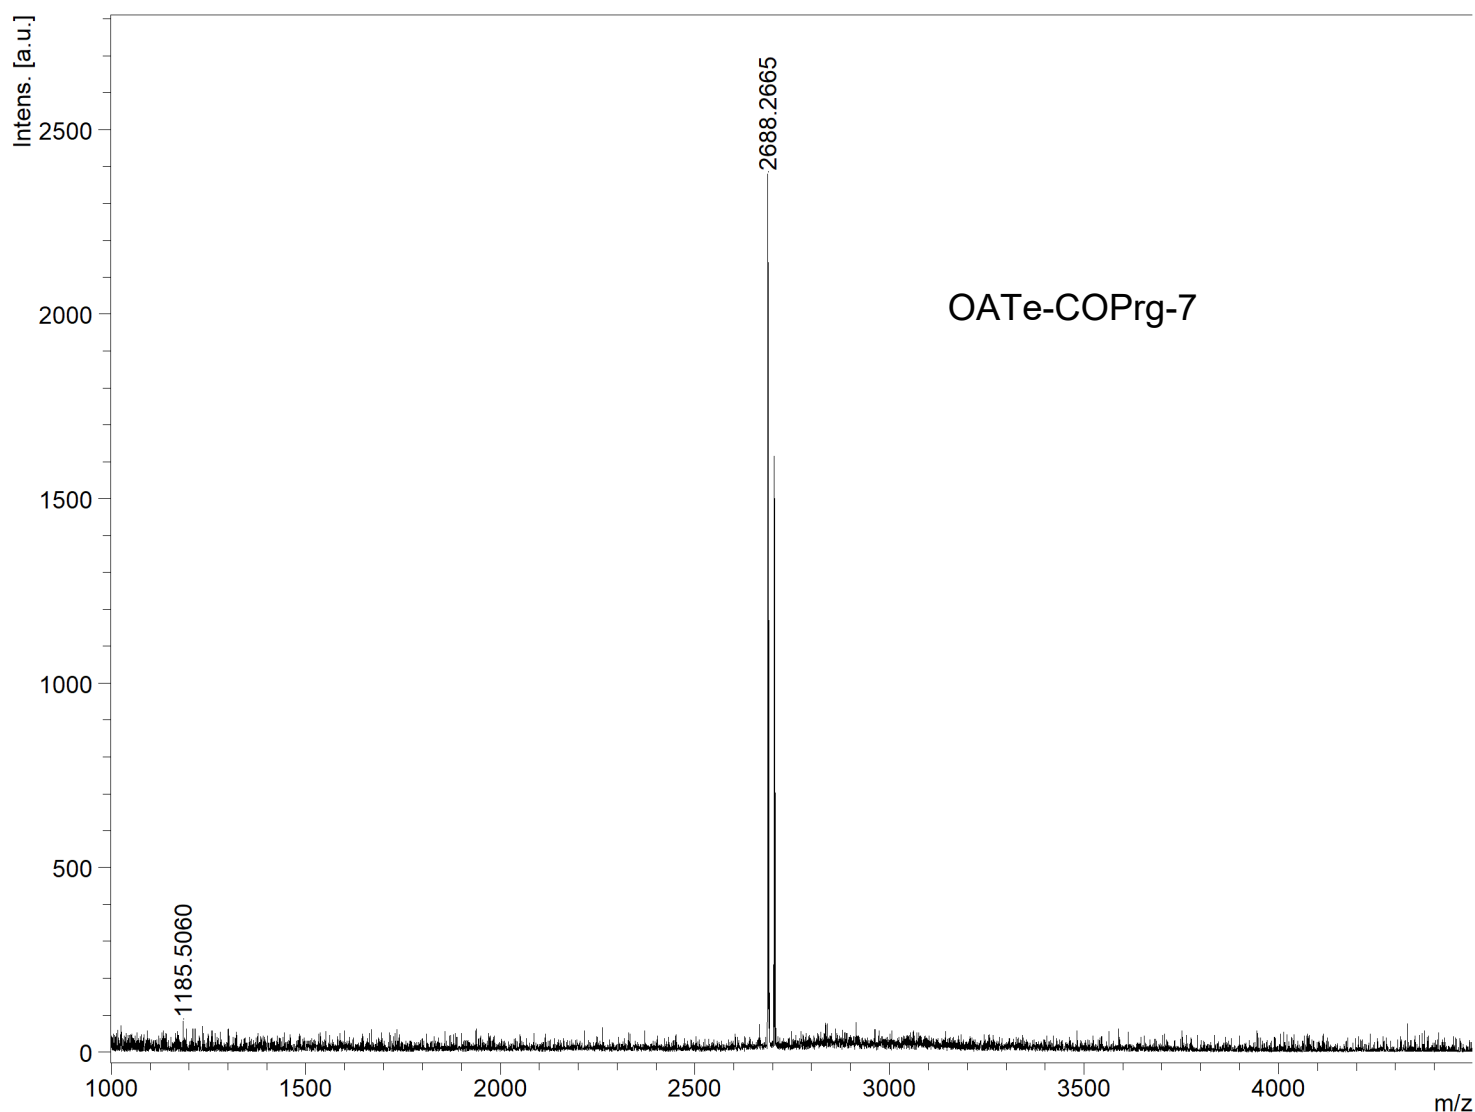

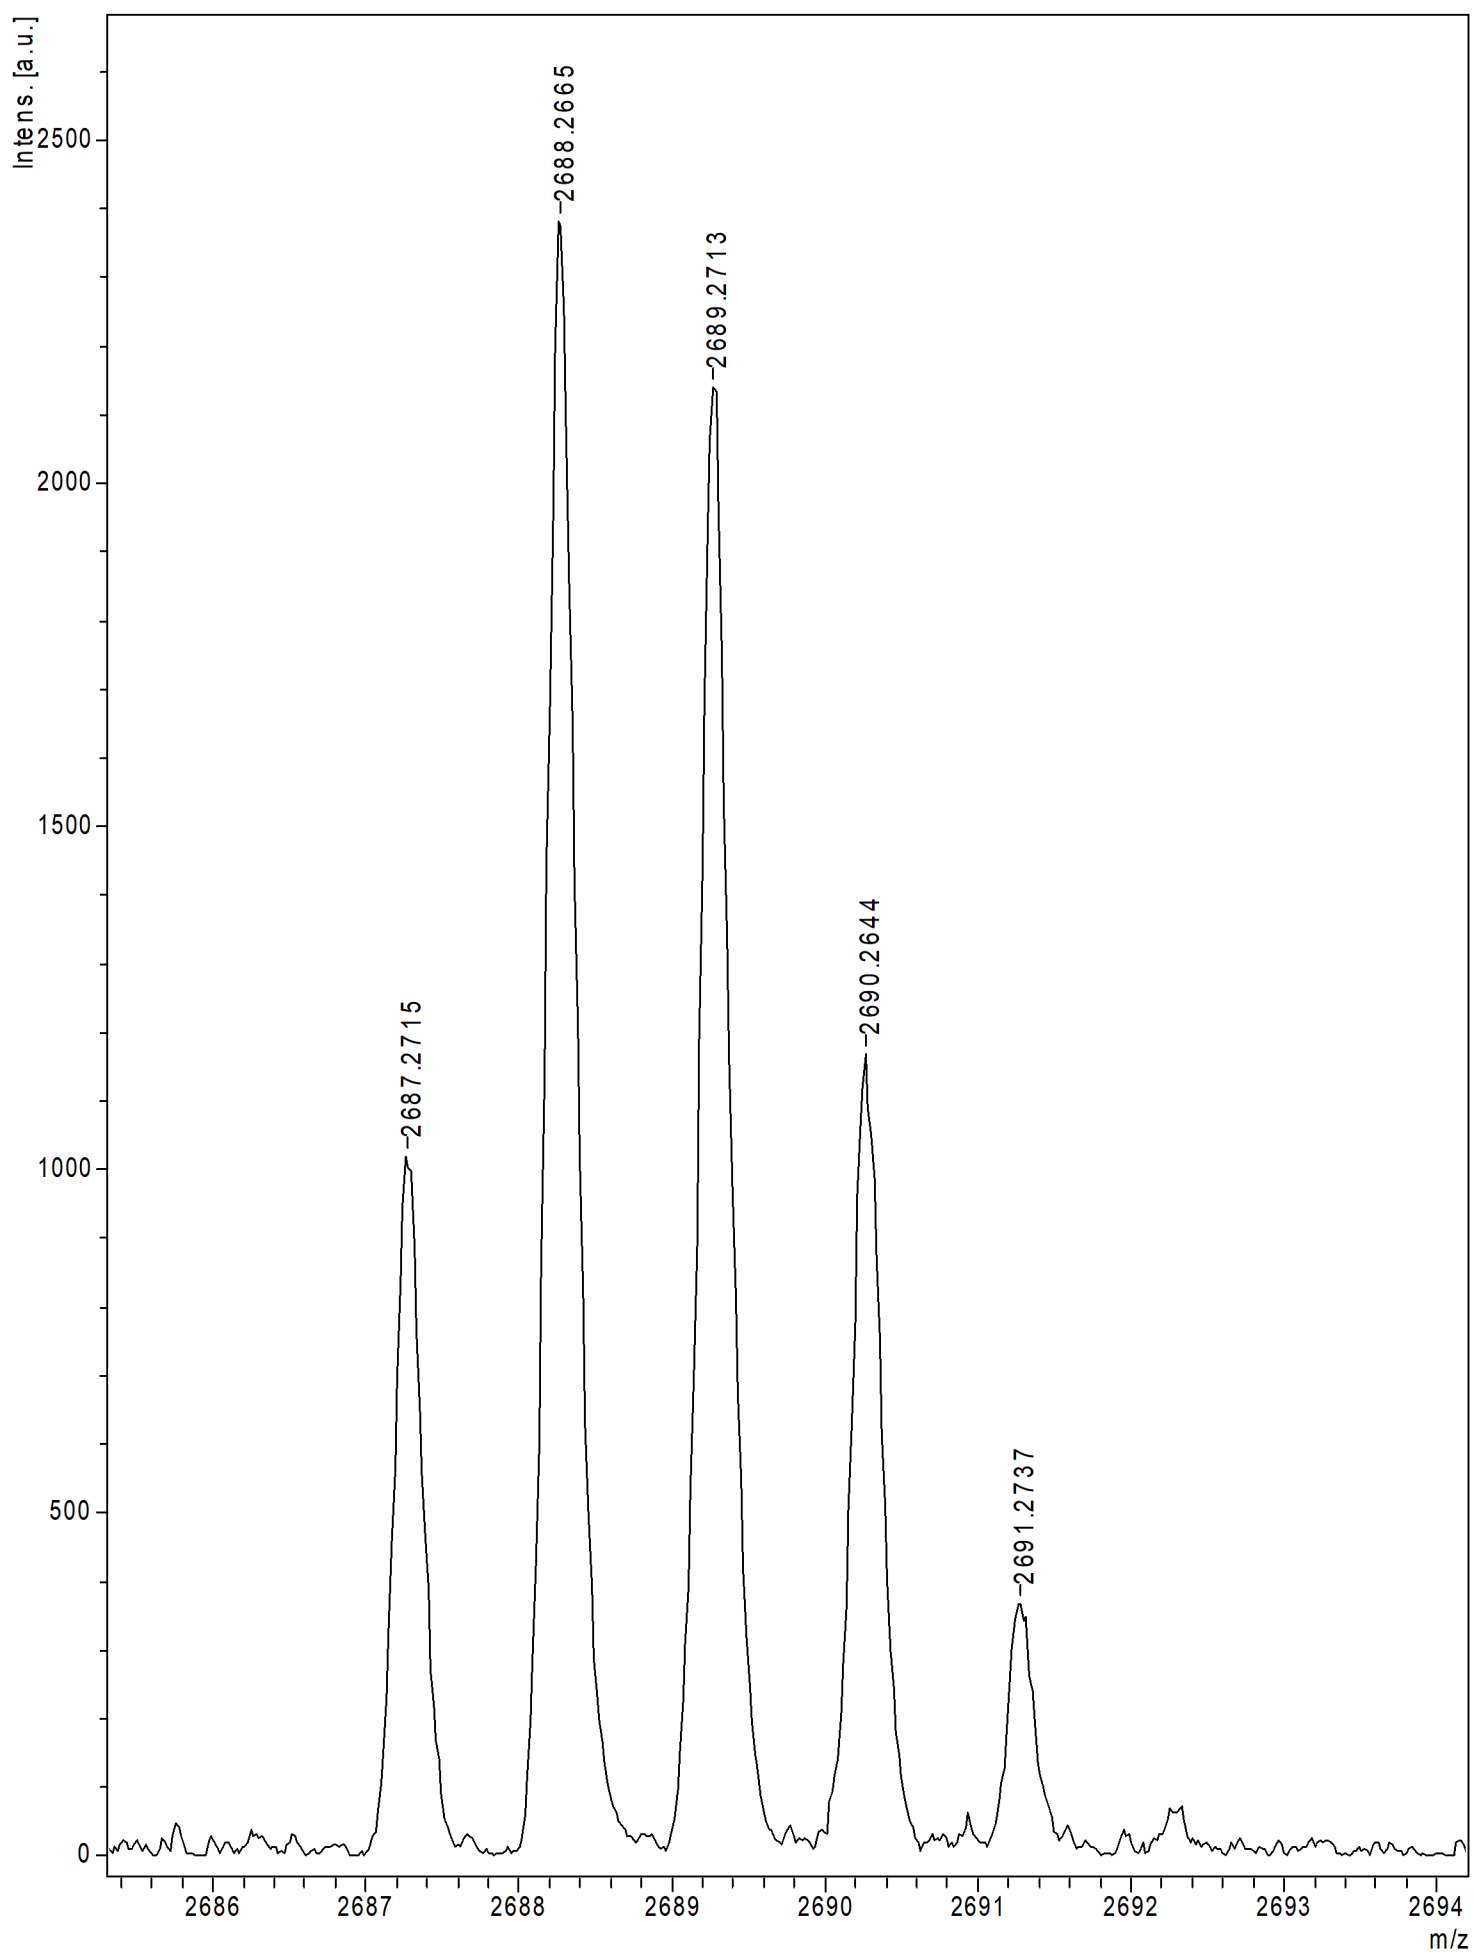

# Thermo QEFMS Analysis Report

## Analysis Info

|               |                                        |                |          |
|---------------|----------------------------------------|----------------|----------|
| Sample Name : | Zk-OATe8                               | Reference No.: | Qhfc192  |
| Instrument :  | Q Exactive Focus Orbitrap              |                |          |
| Source :      | HESI II                                | Polarity :     | Positive |
| Comment :     | ESI pos, 3.2kV, by LC, with sheath gas |                |          |

## Accurate Mass Measurement

|                                                     |                              |
|-----------------------------------------------------|------------------------------|
| Molecular formula :                                 | $C_{208}H_{362}N_{20}O_{12}$ |
| Experimental Mass $[M+2Na]^{2+}$ , $[M+3Na]^{3+}$ : | 1690.40909, 1134.60229       |
| Theoretical Mass $[M+2Na]^{2+}$ , $[M+3Na]^{3+}$ :  | 1690.40898, 1134.60239       |
| Error (ppm) :                                       | 0.0, 0.0                     |

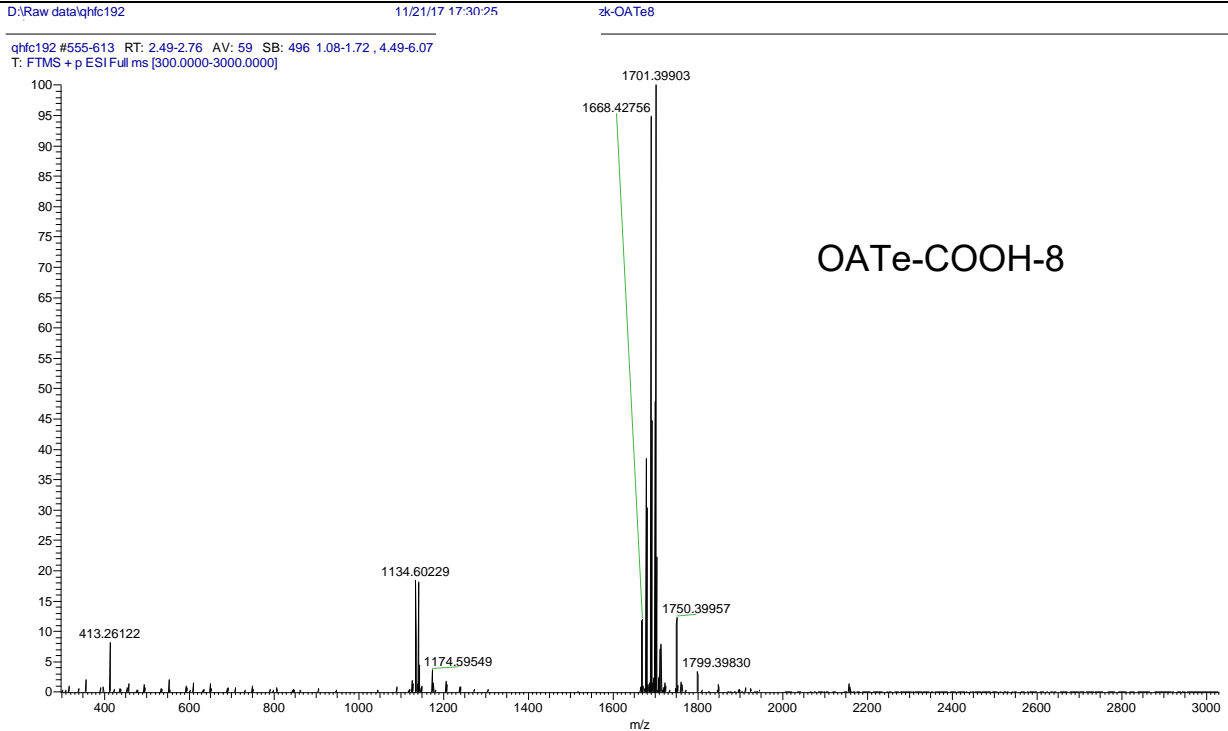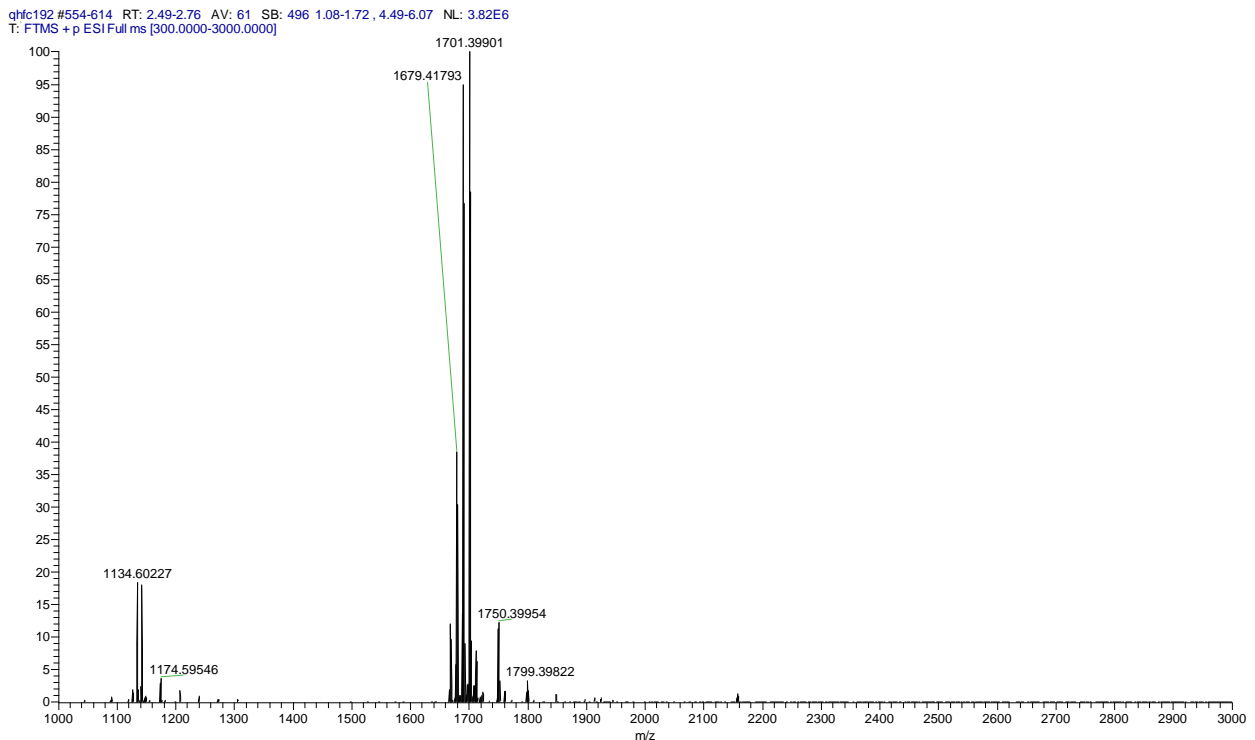

qhfc192 #554-614 RT: 2.49-2.76 AV: 61 SB: 496 1.08-1.72, 4.49-6.07 NL: 3.82E6  
T: FTMS + p ESI Full ms [300.0000-3000.0000]

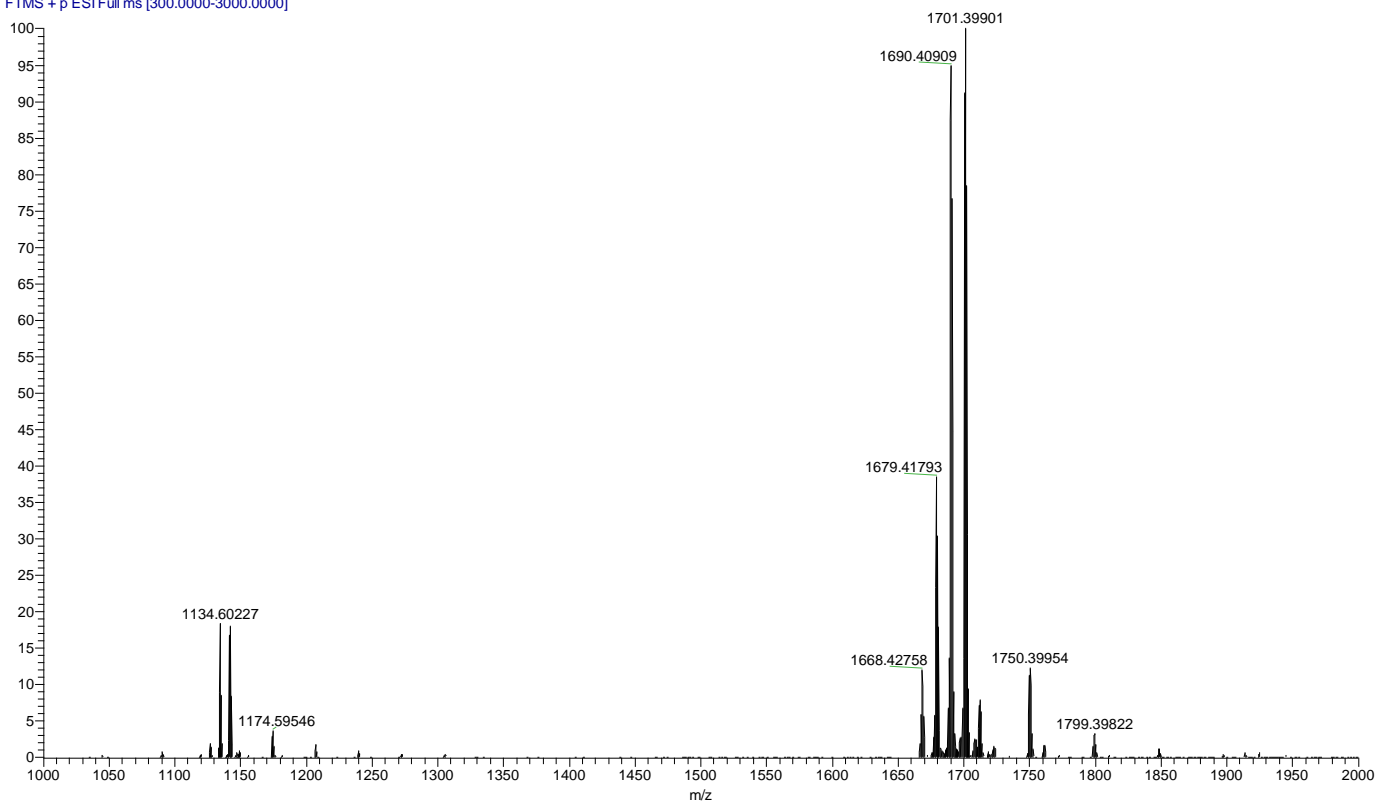

qhfc192 #554-614 RT: 2.49-2.76 AV: 61 SB: 496 1.08-1.72, 4.49-6.07 NL: 3.63E6  
T: FTMS + p ESI Full ms [300.0000-3000.0000]

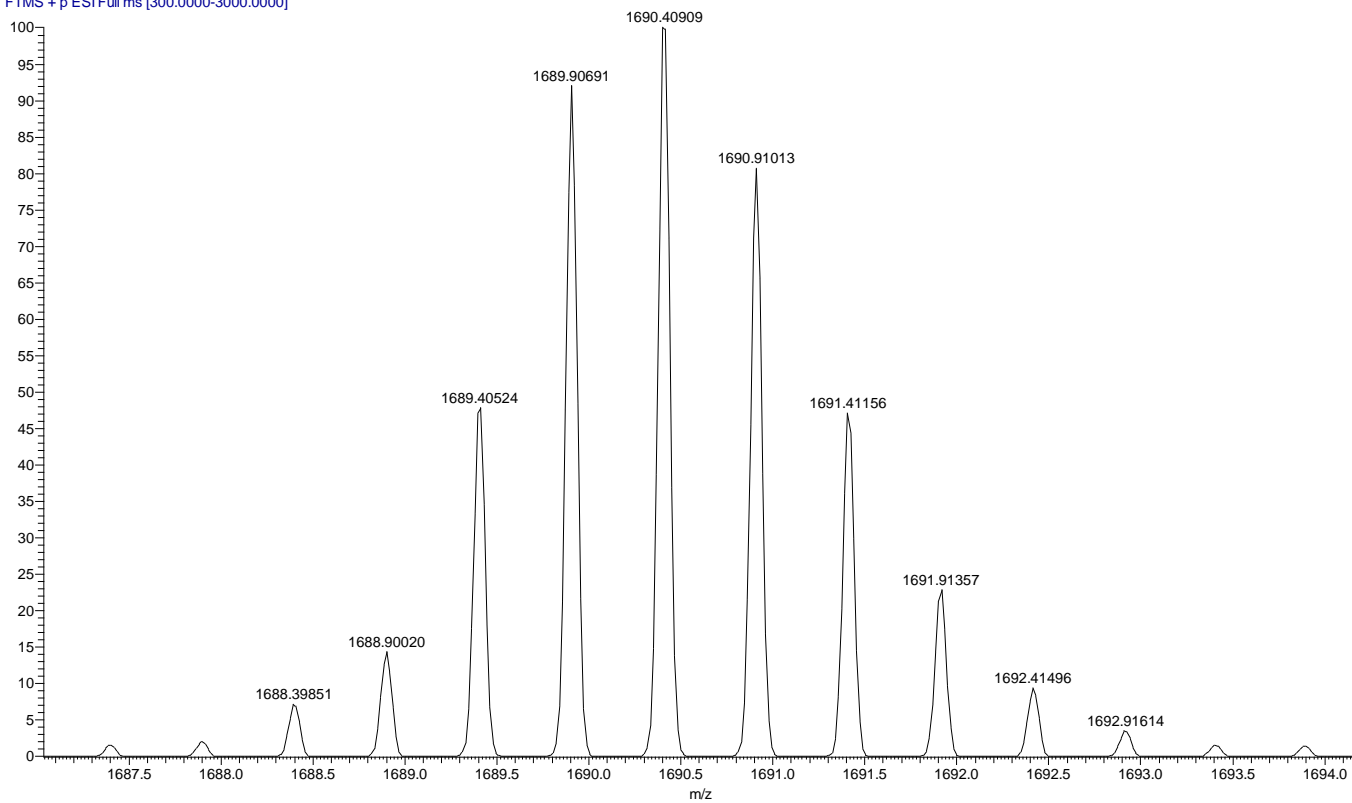

# Bruker Autoflex speed MALDI-TOF MS Analysis Report

Department of Chemistry, The Chinese University of Hong Kong

## Analysis Info

Sample Name: zk-OATe-9 Reference No.: wfhfc069\0\_C2\2  
Applicant Name: Zheng Kun Date of Analysis : 2018-02-13T15:26:23.000  
Method: D:\Methods\flexControlMethods\Test\_RP\_1000-4500\_Da.par  
Polarity: POS PIE delay: 150 ns No. of shots: 600  
Comment: Reflector mode, DCTB as matrix, 384 polished stainless steel target plate

## Accurate Mass Measurement

Molecular formula: C<sub>211</sub>H<sub>365</sub>N<sub>21</sub>O<sub>11</sub>  
Abundant Isotopic (theoretical) [M+Na]<sup>+</sup>: 3394.8604  
Experimental [M+Na]<sup>+</sup>: 3394.8627  
Error (ppm): 0.68

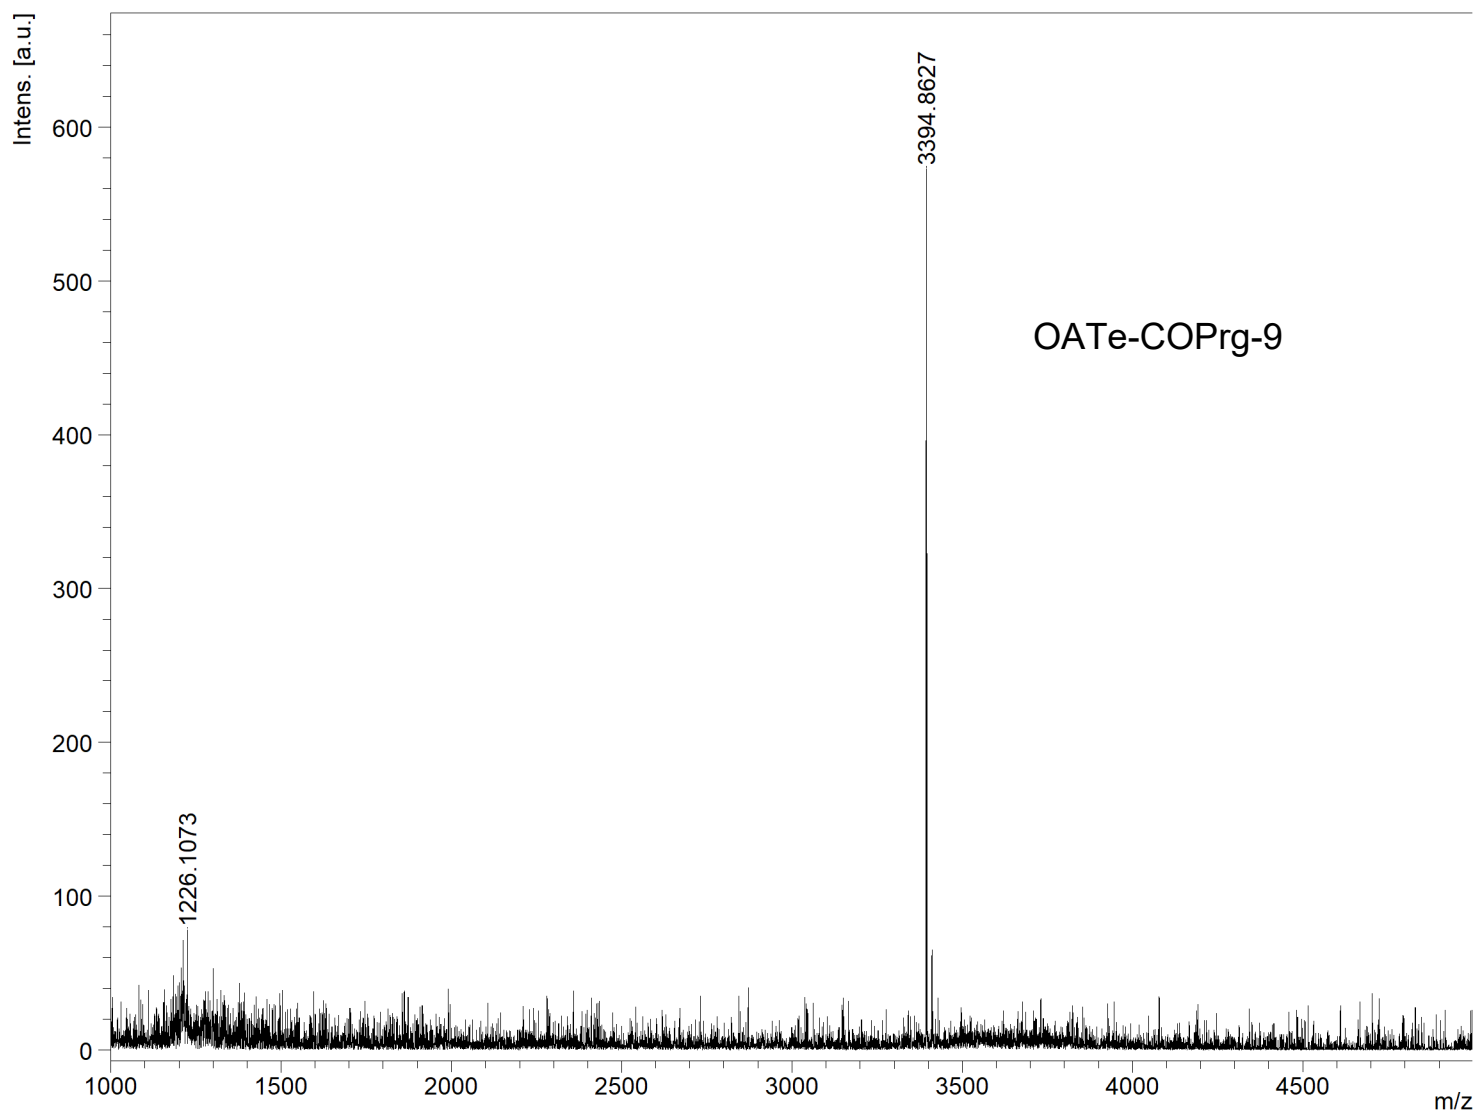



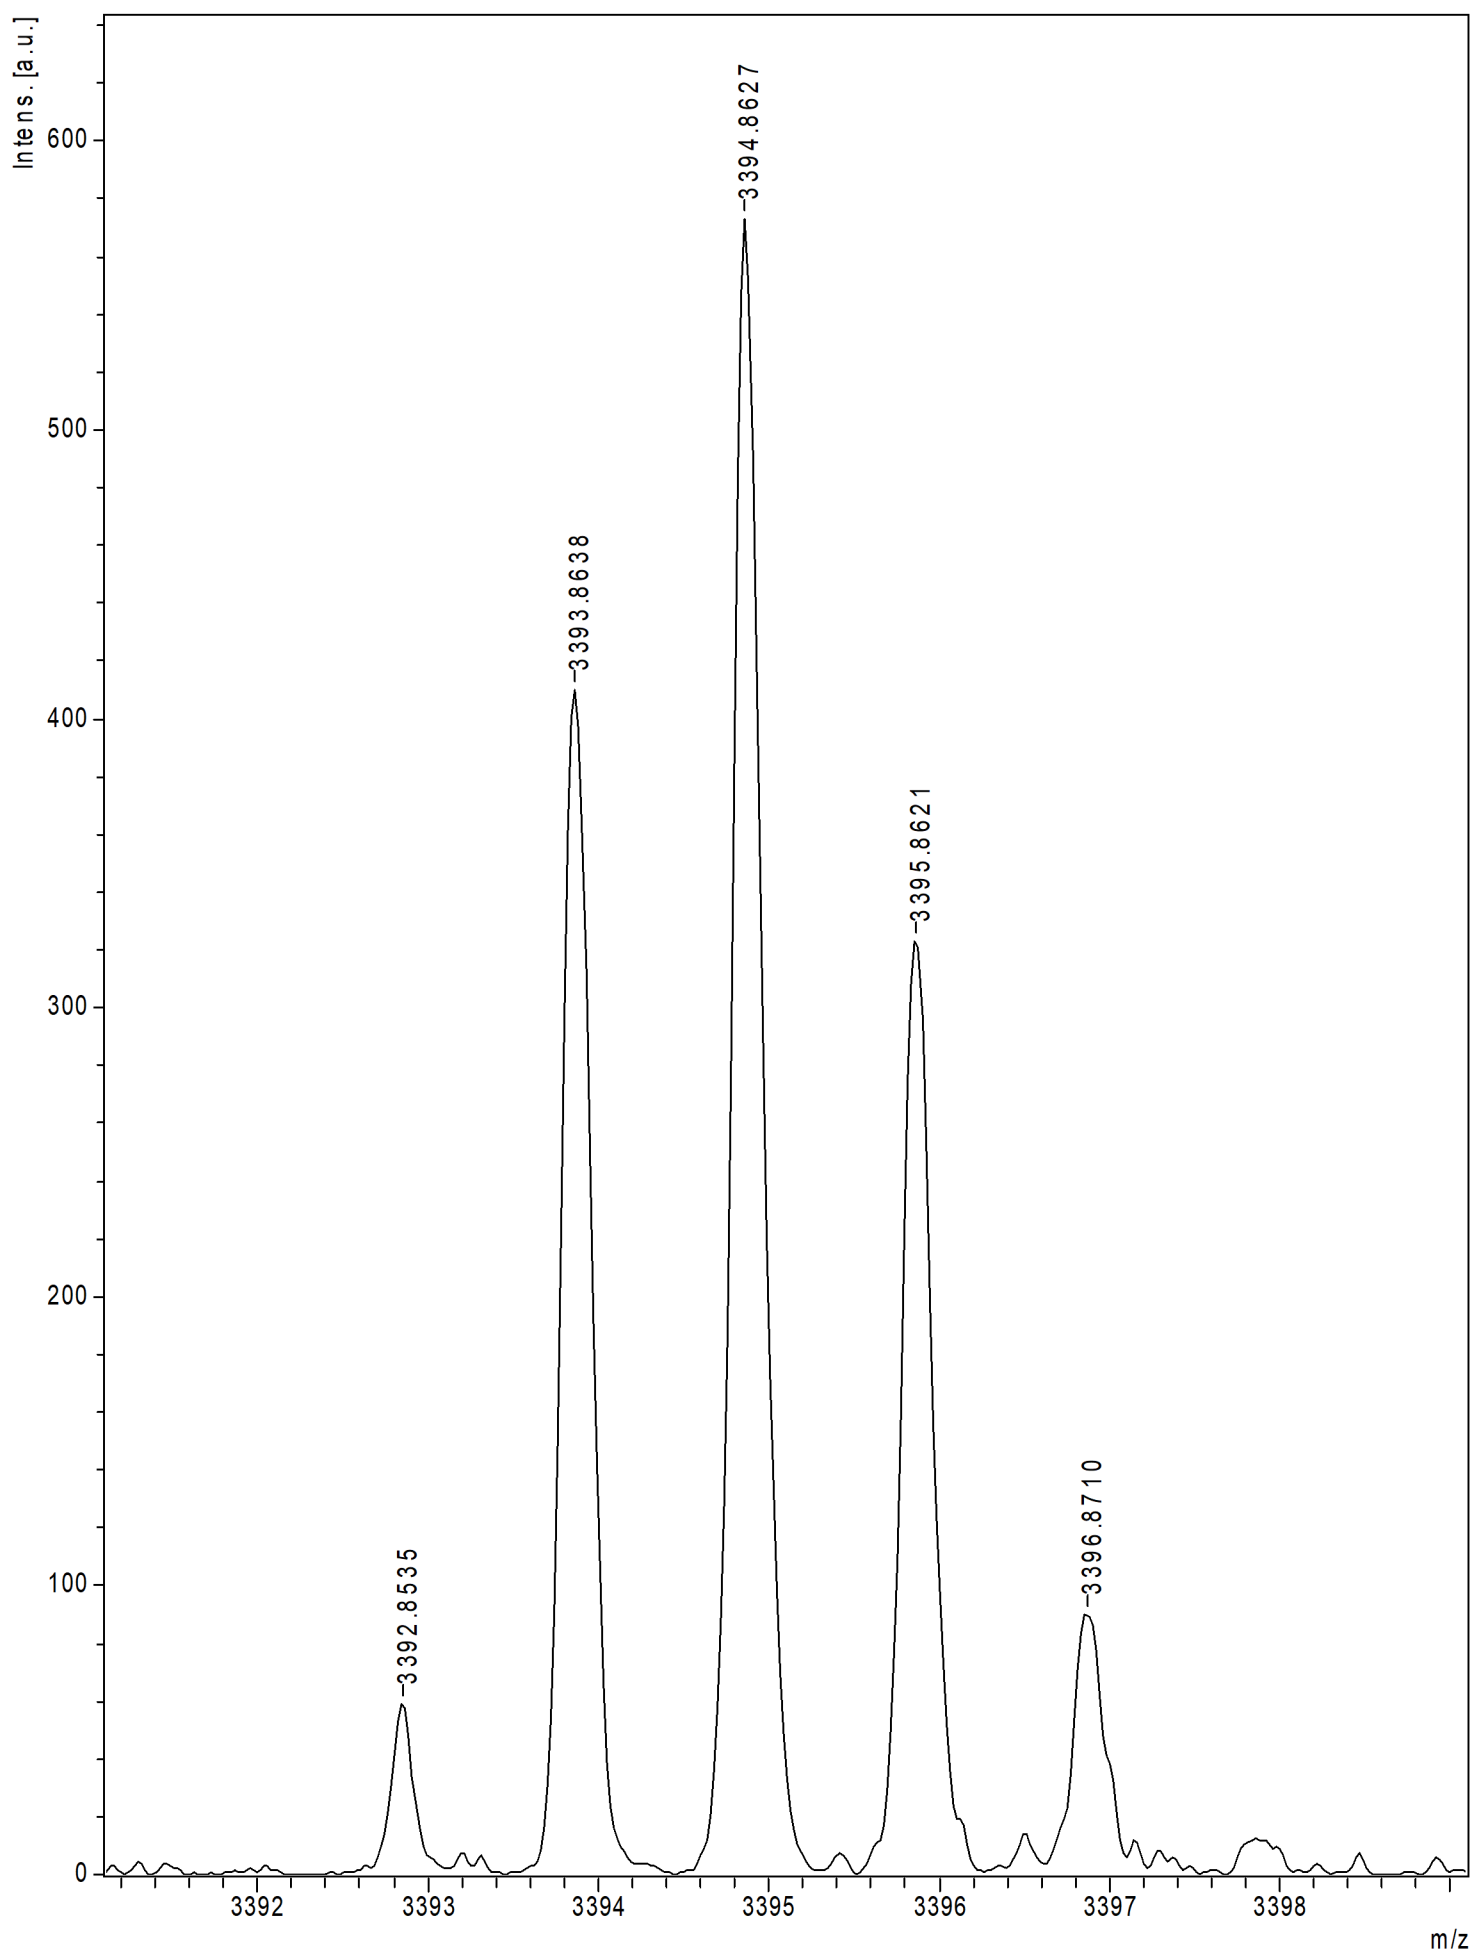

# Thermo QEFMS Analysis Report

## Analysis Info

|               |                                              |                |          |
|---------------|----------------------------------------------|----------------|----------|
| Sample Name : | Zk-OATe10-1                                  | Reference No.: | Wqhfc285 |
| Instrument :  | Q Exactive Focus Orbitrap                    |                |          |
| Source :      | HESI II                                      | Polarity :     | positive |
| Comment :     | ESI pos, 3.5kV, by infusion, with sheath gas |                |          |

## Accurate Mass Measurement

|                                                                  |                                                                   |
|------------------------------------------------------------------|-------------------------------------------------------------------|
| Molecular formula :                                              | C <sub>252</sub> H <sub>437</sub> N <sub>25</sub> O <sub>14</sub> |
| Experimental Mass [M+2Na] <sup>2+</sup> , [M+2H] <sup>2+</sup> : | 2043.20976, 2021.22244                                            |
| Theoretical Mass [M+2Na] <sup>2+</sup> , [M+2H] <sup>2+</sup> :  | 2043.20501, 2021.22307                                            |
| Error (ppm) :                                                    | 2.3, 0.3                                                          |

D:\Raw data\wqhfc285 05/07/18 16:46:17 zk-OATe10-1

wqhfc285 #514-611 RT: 2.31-2.74 AV: 98 SB: 48 0.01-0.22 NL: 3.27E  
T: FTMS + p ESI Full ms [200.0000-3000.0000]

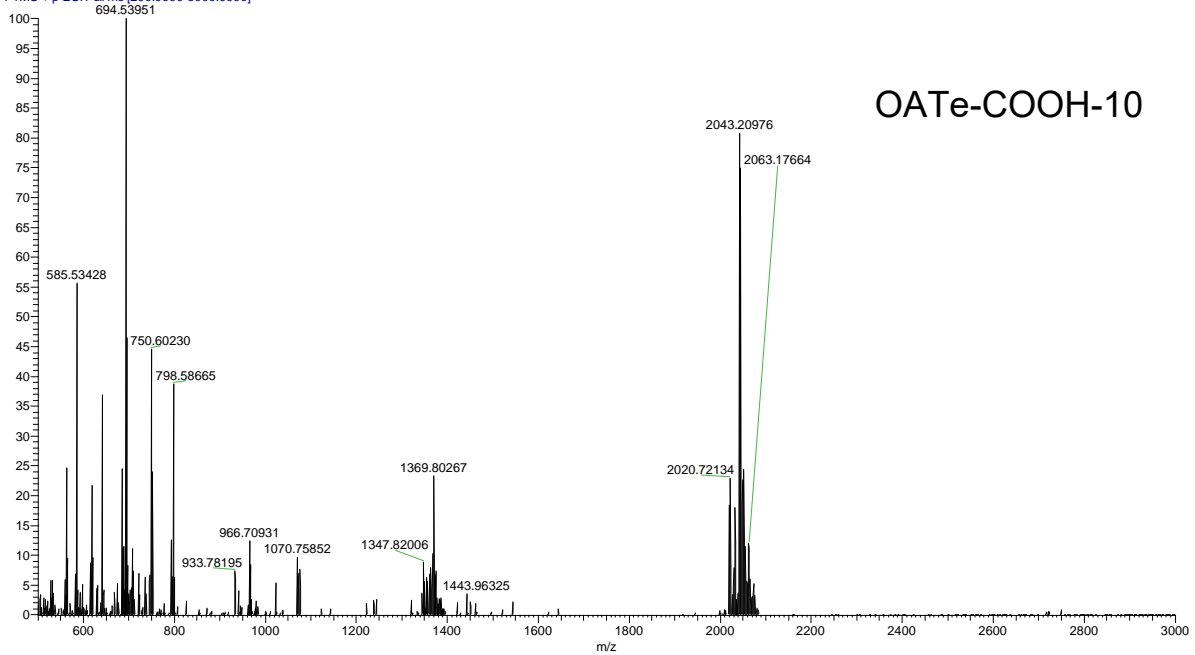

wqhfc285 #514-611 RT: 2.31-2.74 AV: 98 SB: 48 0.01-0.22 NL: 2.64E6  
T: FTMS + p ESI Full ms [200.0000-3000.0000]

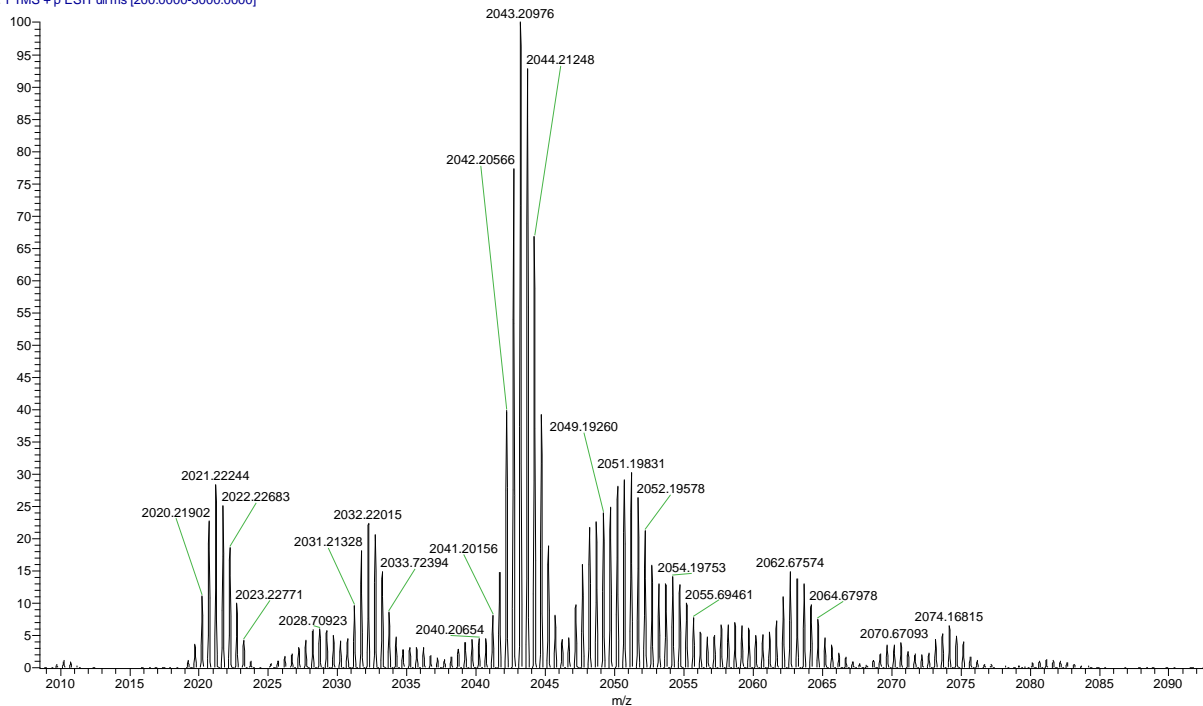

wqhtc285 #514-611 RT: 2.31-2.74 AV: 98 SB: 48 0.01-0.22 NL: 2.64E6  
T: FTMS + p ESI Full ms [200.0000-3000.0000]

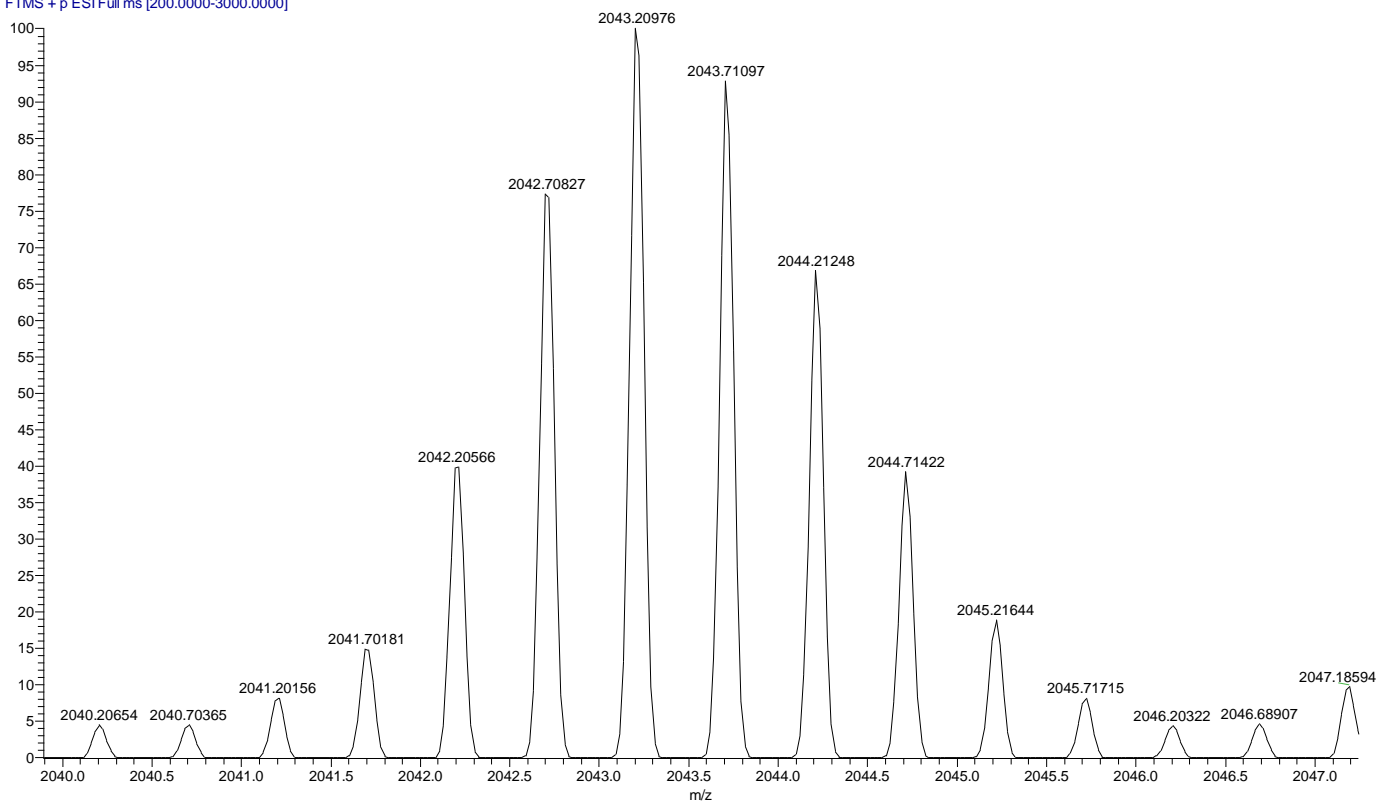

wqhtc285 #514-611 RT: 2.31-2.74 AV: 98 SB: 48 0.01-0.22 NL: 7.52E5  
T: FTMS + p ESI Full ms [200.0000-3000.0000]

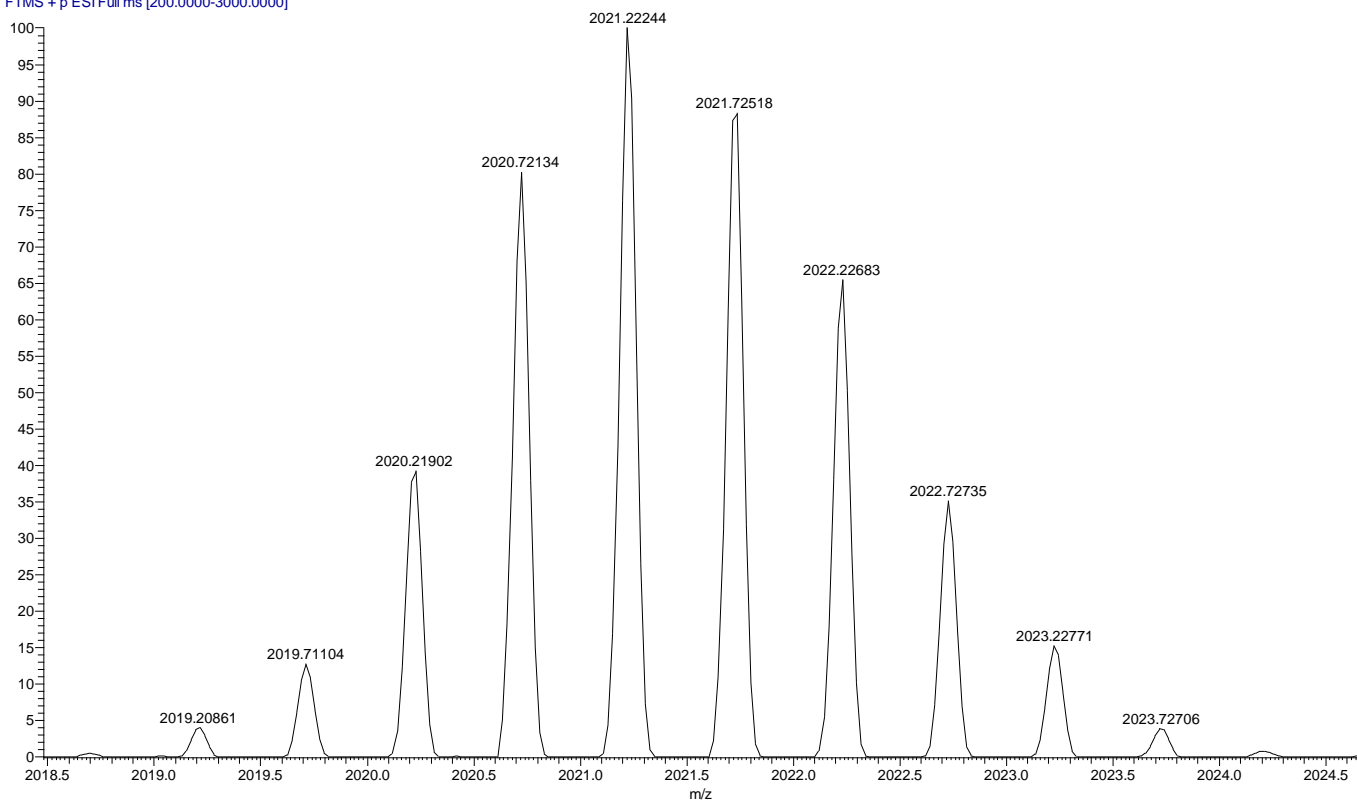

Supplement: c9sc00861f1.pdf [file c9sc00861f1.pdf]
